# Supplementary material
Source: publisher figshare collection journal article supplement (https://acs.figshare.com/ndownloader/files/6005307)
Supplement: Supplementary file 1 [file 6005307]

## Sheet: Protein IDs OVCAR-5 IEF
Protein IDs	Number of proteinsa	Number of peptides identified	Number of unique peptides	Sequence coverage [%]	Mol. weight [kDa]	Fraction 1	Fraction 2	Fraction 3	Fraction 4	Fraction 5	Fraction 6	Fraction 7	Fraction 8	Fraction 9	Fraction 10	Fraction 11	Fraction 12	Fraction 13	Fraction 14	Fraction 15	Fraction 16	Fraction 17	Fraction 18	Fraction 19	Fraction 20	Q-value	Scoreb	MS/MS Count	Protein Evidence Level according to neXtProt 2016-02
sp|A0AV96|RBM47_HUMAN	1	4	4	12.6	64.098					1	2			1			1					1	1			0	25.873	10	1
sp|A0AVT1|UBA6_HUMAN	1	6	6	7.4	117.97							1	1				1	2		1	1					0	20.255	10	1
sp|A0FGR8|ESYT2_HUMAN	1	6	6	12.2	102.36								1	2		1	2	1								0	8.4177	8	1
sp|A0MZ66|SHOT1_HUMAN	1	4	4	9.5	71.639							1	1	1	1							1		1		0	8.3587	5	1
sp|A1L0T0|ILVBL_HUMAN	1	6	6	19.5	67.867												1	1	1		1	1	1	1	1	0	28.216	15	1
sp|A2RRP1|NBAS_HUMAN	1	8	8	4.8	268.57							1		1		1	1	1	2	1		1				0	18.834	9	1
sp|A3KMH1|VWA8_HUMAN	1	5	5	3.7	214.82											1	2	1						1		0	11.382	5	1
sp|A3KN83|SBNO1_HUMAN;sp|Q9Y2G9|SBNO2_HUMAN	2	5;2	5;2	5	154.31													3	1			1				0	5.8144	5	1
sp|A4D1E9|GTPBA_HUMAN	1	5	5	14.7	42.932									1			1		1			1	1	1		0	5.9476	11	1
sp|A5D8V6|VP37C_HUMAN	1	1	1	5.6	38.658									1												0.0040993	1.9163	1	1
sp|A5PLN9|TPC13_HUMAN	1	2	2	9.6	46.523								1	1									1			0	7.8332	3	1
sp|A5YKK6|CNOT1_HUMAN	1	20	20	11.8	266.94					2		2	1	3	1	3	5	3	1		1	2				0	47.852	29	1
sp|A6NDG6|PGP_HUMAN	1	3	3	15	34.006								1			1	2									0	7.7827	4	1
sp|A6NHR9|SMHD1_HUMAN	1	8	8	5.4	226.37						1	1	1	1	1	1			1				2	2		0	13.802	10	1
sp|A6NJ78|MET15_HUMAN;sp|P0C7V9|ME15P_HUMAN	2	4;1	4;1	8.6	46.121												1				1	1				0	5.3477	4	1
sp|A6NKT7|RGPD3_HUMAN;sp|Q7Z3J3|RGPD4_HUMAN	2	8;7	1;1	5.6	197.48	1				1	1	1														0	3.1295	8	1
sp|A8MXV4|NUD19_HUMAN	1	2	2	5.9	42.233															1	1	1	1			0	6.0192	10	1
sp|C4AMC7|WASH3_HUMAN;sp|Q6VEQ5|WASH2_HUMAN;sp|Q9NQA3|WASH6_HUMAN;sp|A8K0Z3|WASH1_HUMAN;sp|A8MWX3|WASH4_HUMAN	5	4;4;3;3;2	4;4;3;3;2	13.2	49.994								1			1	1	2	1							0	26.521	8	1
sp|C9JLW8|F195B_HUMAN	1	4	4	57.7	10.92									1	2	1	1									0	5.1666	7	1
sp|E9PAV3|NACAM_HUMAN;sp|Q13765|NACA_HUMAN	2	6;5	6;5	5.1	205.42	2	4	3	3	4	7	8	7	1			1	1								0	195.83	84	1
sp|O00115|DNS2A_HUMAN	1	2	2	3.9	39.58																	2	2			0	10.303	11	1
sp|O00116|ADAS_HUMAN	1	12	12	28.3	72.911	2	3		1	2	4	4	5	3	1	5	3	3	2			1	1	1	1	0	180.46	102	1
sp|O00139|KIF2A_HUMAN	1	3	3	4.7	79.954								1		1	1										0	5.712	2	1
sp|O00148|DX39A_HUMAN	1	8	1	17.8	49.129												1	1								0	15.317	4	1
sp|O00151|PDLI1_HUMAN	1	13	13	56.5	36.071		2	1		2	2	2	4	5	3	2	1	1	2		3	1	1	1	1	0	150.37	57	1
sp|O00154|BACH_HUMAN	1	7	7	26.1	41.796		1			1				1	2	2	1		1	3			1	1		0	24.841	43	1
sp|O00159|MYO1C_HUMAN	1	13	13	14.1	121.68	1			1	1	1	1	1	1	1		2	3	2		3	3	3	1		0	71.057	32	1
sp|O00160|MYO1F_HUMAN;sp|Q12965|MYO1E_HUMAN	2	1;1	1;1	1.5	124.84								1													0.0013196	2.8703	1	1
sp|O00161|SNP23_HUMAN	1	7	7	41.2	23.354						1	3	2	2							1	1	1	1		0	74.642	21	1
sp|O00165|HAX1_HUMAN	1	2	2	6.5	31.62							1		1												0	4.8185	2	1
sp|O00170|AIP_HUMAN	1	5	5	12.1	37.636	1				1			1	1			2									0	19.221	10	1
sp|O00182|LEG9_HUMAN	1	1	1	3.9	39.518																	1				0	4.8207	1	1
sp|O00193|SMAP_HUMAN	1	2	2	21.3	20.332						2	3														0	15.139	7	1
sp|O00203|AP3B1_HUMAN;sp|Q13367|AP3B2_HUMAN	2	12;1	12;1	16.6	121.32	1					1	1	1	2	1	1			1	4	2	2	1	3	2	0	45.651	49	1
sp|O00214|LEG8_HUMAN	1	2	2	7.3	35.808											1			1							0.00053562	2.9929	2	1
sp|O00217|NDUS8_HUMAN	1	3	3	13.8	23.705			1			1	3	1	2												0	26.892	11	1
sp|O00221|IKBE_HUMAN	1	2	2	7	52.863						1	1												1		0	3.5849	3	1
sp|O00231|PSD11_HUMAN	1	15	15	33.4	47.463	5	3	2	2	3	4	3	6	7	2	4	5	1	3	2	1					0	220.76	119	1
sp|O00232|PSD12_HUMAN	1	13	13	37.9	52.904	2	1		2	4	5	8	9	10			1				1	1				0	314.65	85	1
sp|O00233|PSMD9_HUMAN	1	2	2	12.6	24.682							1	1									1	1	1	1	0	22.896	14	1
sp|O00244|ATOX1_HUMAN	1	1	1	26.5	7.4016									1												0	9.7557	1	1
sp|O00255|MEN1_HUMAN	1	2	2	3.9	68.023													2								0.0094231	1.414	2	1
sp|O00264|PGRC1_HUMAN	1	4	4	30.8	21.671		1			1	2	4	2			1		1	1							0	54.699	79	1
sp|O00267|SPT5H_HUMAN	1	13	13	15.5	121		1			1	1	3	2	1		3	4	3	1			1	1	1		0	102.26	29	1
sp|O00268|TAF4_HUMAN	1	5	5	9.7	110.11							1	1				1	1				2				0	28.719	6	1
sp|O00273|DFFA_HUMAN	1	6	6	23.6	36.521	1	2		2	1		1	1	1					1	2						0	37.942	16	1
sp|O00287|RFXAP_HUMAN	1	1	1	4.8	28.232												2									0.0041112	1.9539	2	1
sp|O00291|HIP1_HUMAN	1	3	3	3.9	116.22									1			1					1	1		1	0	4.4606	5	1
sp|O00299|CLIC1_HUMAN	1	10	10	58.1	26.922	6	5	5	3	7	9	9	5	4		3	3		2							0	309.37	117	1
sp|O00303|EIF3F_HUMAN	1	7	7	24.9	37.563	3	3		2		1			1	2	6	5	4	1		2	3	5	3	1	0	89.184	112	1
sp|O00330|ODPX_HUMAN	1	4	4	7.2	54.122											2	1	1	1					1	1	0	19.987	20	1
sp|O00399|DCTN6_HUMAN	1	1	1	7.4	20.747									1	1											0	3.5074	2	1
sp|O00401|WASL_HUMAN	1	2	2	6.1	54.826							1			1											0	23.713	6	1
sp|O00410|IPO5_HUMAN	1	26	24	32.2	123.63	2	3		1	3	4	5	10	5	3	7	9	8	2	3	1	2	3	2		0	323.31	170	1
sp|O00411|RPOM_HUMAN	1	3	3	4.7	138.62							1					1						1	1		0	4.8391	5	1
sp|O00423|EMAL1_HUMAN	1	1	1	2.1	89.86							1														0.0052707	1.8274	2	1
sp|O00425|IF2B3_HUMAN	1	9	8	19	63.704	2	1					1	2	5				1				2	4	3	2	0	88.587	53	1
sp|O00429|DNM1L_HUMAN	1	18	18	37.2	81.876	1				1	4	8	8	4		3	2	2	2	3	1	1	1	1	1	0	309.97	75	1
sp|O00442|RTCA_HUMAN	1	2	2	5.5	39.336												1							1	1	0.003655	2.0417	3	1
sp|O00443|P3C2A_HUMAN	1	3	3	2.1	190.68													1				2				0	4.3395	3	1
sp|O00461|GOLI4_HUMAN	1	5	5	9.3	81.879	2	2			1	1		1	2	2			1								0	50.433	17	1
sp|O00468|AGRIN_HUMAN	1	14	14	10.6	217.23						1		3	1	3		2		4			1				0	47.761	19	1
sp|O00469|PLOD2_HUMAN	1	5	5	8	84.685									1		2	1					2				0	10.571	7	1
sp|O00471|EXOC5_HUMAN	1	6	6	11.3	81.852					1	1		1		1	1	2	1		1						0	29.436	17	1
sp|O00483|NDUA4_HUMAN	1	2	2	27.2	9.3697						1			1		1	1									0	5.8626	5	1
sp|O00487|PSDE_HUMAN	1	5	5	28.1	34.577	1	1				1	4	3	1	1	2	1	1	2	3						0	47.921	55	1
sp|O00505|IMA4_HUMAN	1	8	5	22.3	57.81	1					1	2	3	3								1		1	1	0	53.805	32	1
sp|O00515|LAD1_HUMAN	1	1	1	3.3	57.13														1							0.0012943	2.6909	1	1
sp|O00541|PESC_HUMAN	1	7	7	14.5	68.002								1			2	1	3	1							0	19.684	10	1
sp|O00560|SDCB1_HUMAN	1	6	6	42.6	32.444					1	1	2	2	1	2	3	4	1								0	110.52	32	1
sp|O00566|MPP10_HUMAN	1	6	6	14.1	78.863						1		2	2		1	1	1		1						0	19.218	11	1
sp|O00567|NOP56_HUMAN	1	15	15	37.4	66.049		1		2	5	4	6	6	8	4	2	5	4	1	2			1	1		0	219.26	98	1
sp|O00571|DDX3X_HUMAN;sp|O15523|DDX3Y_HUMAN	2	12;9	11;8	17.5	73.243	1	1			1	3	2	3	1	1	1	2	2	1		3	2	2	2	1	0	114.17	78	1
sp|O00584|RNT2_HUMAN	1	2	2	10.2	29.48								1									1				0	12.31	3	1
sp|O00592|PODXL_HUMAN	1	4	4	12.7	58.635	2	1					1	3									2	2	2	1	0	17.683	31	1
sp|O00622|CYR61_HUMAN	1	2	2	7.9	42.026												1		1			1	1			0	4.9444	7	1
sp|O00625|PIR_HUMAN	1	1	1	5.5	32.113								1													0	4.9672	1	1
sp|O00629|IMA3_HUMAN	1	11	8	29.4	57.886		1			1	2	1	2	1		2	1	1	1			1				0	50.52	36	1
sp|O00743|PPP6_HUMAN	1	5	5	17	35.144									2							1	1	1			0	17.198	7	1
sp|O00754|MA2B1_HUMAN	1	8	8	11.9	113.74								3	1		1	2	2	3	2		1	1	1		0	55.141	22	1
sp|O00762|UBE2C_HUMAN	1	1	1	7.3	19.652									1												0	3.1405	2	1
sp|O00764|PDXK_HUMAN	1	7	7	29.2	35.102					2	2	1	5	1				1	1							0	34.487	32	1
sp|O00767|ACOD_HUMAN	1	2	2	10.6	41.522	1				1						1	1									0	9.8617	4	1
sp|O14493|CLD4_HUMAN;sp|O95484|CLD9_HUMAN;sp|P56747|CLD6_HUMAN;sp|O15551|CLD3_HUMAN	4	1;1;1;1	1;1;1;1	7.7	22.077		2			2	2	1	1													0	7.4618	10	1
sp|O14497|ARI1A_HUMAN;sp|Q8NFD5|ARI1B_HUMAN	2	11;2	11;2	9.2	242.04							2		3				2	1	1		4	2	1	1	0	37.414	32	1
sp|O14544|SOCS6_HUMAN	1	1	1	3.2	59.527																				1	0.0036487	2.0236	1	1
sp|O14548|COX7R_HUMAN	1	3	3	36.8	12.615											1	1	2	3							0	10.136	13	1
sp|O14558|HSPB6_HUMAN	1	1	1	8.1	17.135																		1	1	1	0	3.1997	7	1
sp|O14561|ACPM_HUMAN	1	2	2	9.6	17.417							1	1	2	1											0	6.1059	5	1
sp|O14562|UBFD1_HUMAN	1	3	3	20.1	33.382								1				1	1						1		0	10.073	3	1
sp|O14579|COPE_HUMAN	1	6	6	30.2	34.482					1	1		4			2	1				1	1	1	1	1	0	110.76	19	1
sp|O14617|AP3D1_HUMAN	1	12	12	15	130.16	1					1	4		1				1	1	1	1	1	2	2		0	41.862	26	1
sp|O14618|CCS_HUMAN	1	1	1	4.7	29.04						1	1														0.0022472	2.2922	2	1
sp|O14657|TOR1B_HUMAN	1	4	4	10.4	37.978					1	1		2				1		1							0	21.83	10	1
sp|O14662|STX16_HUMAN	1	4	4	20.3	37.031					1		1		3						1						0	13.075	6	1
sp|O14672|ADA10_HUMAN	1	8	8	9.9	84.141						1	1	2		2	2	2	3			1	1	1	1		0	75.063	27	1
sp|O14734|ACOT8_HUMAN	1	3	3	17.2	35.914								2						1			1	1			0	13.264	8	1
sp|O14737|PDCD5_HUMAN	1	6	6	36.8	14.285		1			1	1			1	1	2	2	1	3							0	48.199	22	1
sp|O14744|ANM5_HUMAN	1	4	4	9.3	72.683					1	1	2				1	1	1					1	1	1	0	24.052	36	1
sp|O14745|NHRF1_HUMAN	1	8	8	31.3	38.868	2	4	2	2	2	3	4	2		3	2										0	125.38	77	1
sp|O14763|TR10B_HUMAN	1	2	2	5.5	47.878								1					1								0	3.6827	2	1
sp|O14773|TPP1_HUMAN	1	3	3	8.2	61.247	1	1			1	1	2	1						1	2	1	1	2		1	0	32.381	35	1
sp|O14776|TCRG1_HUMAN	1	9	9	11.5	123.9	1						2	1	1	1	1	2		1							0	18.645	17	1
sp|O14777|NDC80_HUMAN	1	5	5	10.7	73.912							1	2				1	1								0	7.2577	5	1
sp|O14787|TNPO2_HUMAN	1	7	5	13.9	101.39	1	1			2	1	3	3						2	3						0	44.917	42	1
sp|O14802|RPC1_HUMAN	1	1	1	1.3	155.64															1						0.0068509	1.6736	1	1
sp|O14818|PSA7_HUMAN;sp|Q8TAA3|PSA7L_HUMAN	2	7;3	7;3	33.5	27.887	1	2	2	2	5	6	7	5							1						0	323.31	54	1
sp|O14828|SCAM3_HUMAN	1	7	7	30.8	38.287	2								3		2	1		2		1					0	36.419	15	1
sp|O14841|OPLA_HUMAN	1	3	3	4.3	137.46							1							1	1						0	8.5135	3	1
sp|O14867|BACH1_HUMAN	1	3	3	5.4	81.957						1			1	1				1							0	7.89	4	1
sp|O14874|BCKD_HUMAN	1	2	2	7.8	46.36												1	1								0	4.7879	2	1
sp|O14879|IFIT3_HUMAN	1	1	1	4.1	55.984															1						0	6.5477	1	1
sp|O14908|GIPC1_HUMAN;sp|Q8TF64|GIPC3_HUMAN	2	7;1	7;1	22.2	36.049					1		3	2	1	1							1	1			0	36.297	14	1
sp|O14925|TIM23_HUMAN;sp|Q5SRD1|TI23B_HUMAN	2	2;2	2;2	17.7	21.943					1	1	3	1													0	54.16	8	1
sp|O14929|HAT1_HUMAN	1	7	7	21.5	49.512						1	4	1		2	1			1							0	24.385	14	1
sp|O14933|UB2L6_HUMAN	1	1	1	9.8	17.769							2														0	4.4008	2	1
sp|O14936|CSKP_HUMAN	1	10	10	13.1	105.12									4		1	3	1		2						0	24.117	17	1
sp|O14949|QCR8_HUMAN	1	2	2	15.9	9.9062													1	2							0	4.3295	4	1
sp|O14964|HGS_HUMAN	1	2	2	6.3	86.191	1						1											1	2	1	0	43.045	14	1
sp|O14965|AURKA_HUMAN	1	2	2	8.4	45.809										1					1						0	3.7976	2	1
sp|O14966|RAB7L_HUMAN;sp|P57729|RAB38_HUMAN;sp|Q13637|RAB32_HUMAN	3	1;1;1	1;1;1	5.4	23.155									1												0.0013021	2.743	1	1
sp|O14974|MYPT1_HUMAN	1	7	7	8.7	115.28						1		2	1		1		1				1	1	1		0	12.987	19	1
sp|O14976|GAK_HUMAN	1	10	10	10.1	143.19						3	1	2	3					3							0	27.871	11	1
sp|O14979|HNRDL_HUMAN	1	3	3	9.3	46.437		1	1		1	1	1	2		1											0	17.821	15	1
sp|O14980|XPO1_HUMAN	1	29	29	32.6	123.38	3	4		1	4	4	6	10	10	4	6	8	6	1		2	5	7	5	3	0	323.31	182	1
sp|O14981|BTAF1_HUMAN	1	1	1	0.6	206.89													1								0.0096154	1.3766	1	1
sp|O15020|SPTN2_HUMAN	1	14	10	8.4	271.32					1		2	2	1	1		1	1		2						0	41.949	14	1
sp|O15027|SC16A_HUMAN	1	3	3	3	233.51							1								1		1	1			0	20.612	6	1
sp|O15031|PLXB2_HUMAN	1	22	22	15.3	205.12	1	1			2	3	3	7	4		4	8	4	4	1	2	3	3	3	3	0	125.77	113	1
sp|O15042|SR140_HUMAN	1	6	6	8.4	118.29					2	1	2			1	2		2								0	29.046	10	1
sp|O15061|SYNEM_HUMAN	1	2	2	2	172.77										1				1							0	5.1722	3	1
sp|O15067|PUR4_HUMAN	1	9	9	10.5	144.73							2	3	1		2	2	1				2	2	2	2	0	21.325	25	1
sp|O15084|ANR28_HUMAN	1	5	5	6.9	112.96									2	2	1	3				1	1			1	0	24.61	16	1
sp|O15091|MRRP3_HUMAN	1	2	2	5.1	67.315								1					1								0	8.7423	2	1
sp|O15116|LSM1_HUMAN	1	1	1	12	15.179											1	1									0	3.753	2	1
sp|O15118|NPC1_HUMAN	1	2	2	2	142.17											1	2	1								0	4.7188	5	1
sp|O15126|SCAM1_HUMAN	1	2	2	14.5	37.92															1	1	1		1	1	0	38.581	21	1
sp|O15127|SCAM2_HUMAN	1	2	2	9.7	36.648	1	1						1	2												0	16.499	10	1
sp|O15143|ARC1B_HUMAN	1	4	3	15.3	40.949												1		2							0	24.408	10	1
sp|O15144|ARPC2_HUMAN	1	4	4	16	34.333	1	1	1				2	2	2	1				1	2						0	10.695	23	1
sp|O15145|ARPC3_HUMAN	1	2	2	13.5	20.546					1	2	1										1	1	1	1	0	8.7806	13	1
sp|O15155|BET1_HUMAN	1	1	1	15.3	13.289							2														0	10.153	4	1
sp|O15156|ZBT7B_HUMAN	1	1	1	2	58.026														1							0.0036702	2.0781	1	1
sp|O15160|RPAC1_HUMAN	1	7	7	28.6	39.249						4	2		1			2	1		1						0	29.959	17	1
sp|O15164|TIF1A_HUMAN	1	3	3	3.6	116.83						1							1		1						0	8.9219	3	1
sp|O15173|PGRC2_HUMAN	1	5	5	32.3	23.818	3	2		1	1	3	4	3		1				1		1	1	1			0	44.154	44	1
sp|O15212|PFD6_HUMAN	1	2	2	15.5	14.582	2					2	2	2	2								1	1	1	1	0	21.532	21	1
sp|O15213|WDR46_HUMAN	1	1	1	2.5	68.07										1											0.0013028	2.7458	1	1
sp|O15230|LAMA5_HUMAN	1	8	8	3.5	399.73								1		1		1	1	2	1			2	1		0	12.874	11	1
sp|O15231|ZN185_HUMAN	1	3	3	7.3	73.525									1								1		1		0	5.1215	4	1
sp|O15234|CASC3_HUMAN	1	1	1	2.4	76.277																	1		1		0	7.6093	13	1
sp|O15258|RER1_HUMAN	1	2	2	14.8	22.958						1	1					1									0	9.097	2	1
sp|O15260|SURF4_HUMAN	1	3	3	15.2	30.394						1	3		2							1	1			1	0	46.469	19	1
sp|O15269|SPTC1_HUMAN	1	2	2	6.6	52.743	1					1		2							2	2					0	30.614	16	1
sp|O15270|SPTC2_HUMAN	1	8	8	17.8	62.924						2					1	2		1			1	1		1	0	13.103	12	1
sp|O15294|OGT1_HUMAN	1	12	12	17	116.92						1	1	2			3	4	4	2	1	2		1	1	1	0	51.448	40	1
sp|O15305|PMM2_HUMAN	1	3	3	12.6	28.082						2	1									2					0	15.377	12	1
sp|O15320|CTGE5_HUMAN	1	4	4	4	90.995										1				1							0	28.681	3	1
sp|O15321|TM9S1_HUMAN	1	4	4	10.4	68.86						1		1			1			2							0	13.81	4	1
sp|O15327|INP4B_HUMAN	1	11	11	17.6	104.74						1	1	1			3	3	1	1	1		1				0	40.974	15	1
sp|O15344|TRI18_HUMAN	1	1	1	1.6	75.25												1									0	3.3923	1	1
sp|O15347|HMGB3_HUMAN	1	3	3	13.5	22.98	2								1			1	1								0	4.7066	8	1
sp|O15355|PPM1G_HUMAN	1	8	8	17.6	59.271	1	2			3	3	5	5	2			1						1			0	71.384	41	1
sp|O15357|SHIP2_HUMAN	1	6	6	6.9	138.6								1	2		1	1	1								0	8.4208	6	1
sp|O15371|EIF3D_HUMAN	1	8	8	25.7	63.972	1	1			2	2	2	1	2	2	3	5		2		1					0	131.38	48	1
sp|O15372|EIF3H_HUMAN	1	6	6	17.3	39.93							1	1			2	2	2		2						0	26.989	19	1
sp|O15382|BCAT2_HUMAN	1	9	9	27.6	44.287									3		2	2	2	1	2	1					0	126.81	50	1
sp|O15397|IPO8_HUMAN	1	4	4	4.8	119.94												1		1			1	1			0	7.032	4	1
sp|O15400|STX7_HUMAN	1	4	4	27.2	29.815						1	2	1	2					1							0	16.304	10	1
sp|O15427|MOT4_HUMAN	1	1	1	1.7	49.469											1	1	1								0.0024863	2.2552	7	1
sp|O15438|MRP3_HUMAN	1	3	3	2.8	169.34													1	1				1			0	4.2428	3	1
sp|O15439|MRP4_HUMAN	1	2	2	1.8	149.52										1		1									0.0057238	1.791	2	1
sp|O15446|RPA34_HUMAN	1	8	8	31.6	54.985							2	1	3	2							2		2		0	49.143	27	1
sp|O15479|MAGB2_HUMAN	1	2	2	6.9	35.277										1											0	4.4537	3	1
sp|O15498|YKT6_HUMAN	1	3	3	17.2	22.417						1	1						1			1					0	8.9282	5	1
sp|O15511|ARPC5_HUMAN	1	4	4	31.8	16.32												2	2			1	2	1	1	1	0	21.568	15	1
sp|O15514|RPB4_HUMAN	1	2	2	17.6	16.311							1							1							0	9.5945	4	1
sp|O15525|MAFG_HUMAN	1	2	2	15.4	17.849																		1	1	1	0	4.8709	3	1
sp|O15533|TPSN_HUMAN	1	1	1	2.2	47.625																		1		1	0.0013154	2.8431	2	1
sp|O15541|R113A_HUMAN	1	1	1	4.7	38.787											2										0.0029725	2.212	2	1
sp|O43143|DHX15_HUMAN	1	9	9	14.1	90.932		1			1	1	1			1	2	5	3			1	1	2	2	2	0	31.358	48	1
sp|O43148|MCES_HUMAN	1	8	8	25.2	54.843					1	2	2	2		1	1	1	2	2							0	42.867	18	1
sp|O43150|ASAP2_HUMAN	1	3	2	4.6	111.65							1					1									0	12.4	2	1
sp|O43156|TTI1_HUMAN	1	1	1	1.3	122.07																	1	1	1		0	3.4771	2	1
sp|O43157|PLXB1_HUMAN	1	3	3	3	232.3										1					1	1					0	6.7092	3	1
sp|O43169|CYB5B_HUMAN	1	4	4	52.1	16.332		1				1	2			1	2	1									0	20.581	11	1
sp|O43172|PRP4_HUMAN	1	6	6	13.2	58.449							1		1		1	1			1	2	2				0	33.516	22	1
sp|O43175|SERA_HUMAN	1	16	16	36.2	56.65	6	3	2	3	6	6	6	9	7		1	2	3	4	3	8	5	5	5	5	0	323.31	291	1
sp|O43181|NDUS4_HUMAN	1	1	1	8.6	20.108	1								1	1											0	4.494	3	1
sp|O43237|DC1L2_HUMAN	1	7	7	20.5	54.099	1						3	2	4					1							0	99.08	15	1
sp|O43242|PSMD3_HUMAN	1	9	9	19.5	60.977	1	1				2	5	2	5	1											0	42.269	21	1
sp|O43251|RFOX2_HUMAN	1	1	1	6.7	41.373											1										0	19.079	1	1
sp|O43252|PAPS1_HUMAN;sp|O95340|PAPS2_HUMAN	2	4;1	4;1	8.8	70.832						2	2										1	1	1	1	0	24.799	10	1
sp|O43264|ZW10_HUMAN	1	14	14	26.3	88.828	1						6	3	4	1	1	2	2	2							0	101.31	33	1
sp|O43278|SPIT1_HUMAN	1	1	1	1.7	58.397													1								0.0022613	2.3517	1	1
sp|O43286|B4GT5_HUMAN	1	1	1	3.1	45.118												1									0.0094015	1.3977	1	1
sp|O43290|SNUT1_HUMAN	1	11	11	16.4	90.254					1	3	3	3				1	1					1	1	1	0	51.677	22	1
sp|O43292|GPAA1_HUMAN	1	1	1	1.8	67.622												1									0.009795	1.3361	1	1
sp|O43293|DAPK3_HUMAN	1	2	2	5.7	52.535							3	2													0	9.6656	4	1
sp|O43324|MCA3_HUMAN	1	3	3	26.4	19.81							1							1		1	1			1	0	41.293	9	1
sp|O43390|HNRPR_HUMAN	1	8	5	13.1	70.942				1	1	3	3	3	2			1	1								0	41.472	18	1
sp|O43395|PRPF3_HUMAN	1	6	6	14.8	77.528	1						2	1	1			1	1	2		1					0	14.664	10	1
sp|O43396|TXNL1_HUMAN	1	4	4	21.8	32.251						2	2	1	1	1								1		1	0	23.961	7	1
sp|O43399|TPD54_HUMAN	1	9	9	52.4	22.237	3	2	3	1	4	3	6	3	2	1	1	1	1	1		1	2	2	1	1	0	88.188	85	1
sp|O43402|EMC8_HUMAN	1	2	2	14.3	23.773								1						1	1						0	9.802	4	1
sp|O43414|ERI3_HUMAN	1	1	1	3.3	37.238																		1			0.0075117	1.6089	1	1
sp|O43427|FIBP_HUMAN	1	2	2	9.6	41.878									2												0	3.251	2	1
sp|O43432|IF4G3_HUMAN	1	4	1	2.3	176.65						1	1														0	7.5485	2	1
sp|O43447|PPIH_HUMAN	1	4	4	47.5	19.208					1	3	2	1									1				0	32.385	7	1
sp|O43464|HTRA2_HUMAN;sp|P83110|HTRA3_HUMAN	2	6;1	6;1	19	48.84				1	1	1	2		2				1	4							0	32.908	13	1
sp|O43474|KLF4_HUMAN	1	2	2	7.8	54.67														1	1						0.0036937	2.1369	2	1
sp|O43488|ARK72_HUMAN;sp|Q8NHP1|ARK74_HUMAN	2	4;1	4;1	18.1	39.589													1			2	4	4	2		0	20.857	24	1
sp|O43491|E41L2_HUMAN;sp|Q9Y2J2|E41L3_HUMAN	2	16;1	16;1	17.1	112.59	1				2	3	4	2	2	1							1	1	2		0	153.12	33	1
sp|O43504|LTOR5_HUMAN	1	4	4	85.7	9.6138	1	1					2				2	2									0	63.012	6	1
sp|O43505|B4GA1_HUMAN	1	1	1	3.9	47.119								1													0	9.0889	1	1
sp|O43570|CAH12_HUMAN	1	1	1	4.2	39.45															1						0	3.3683	1	1
sp|O43583|DENR_HUMAN	1	2	2	19.7	22.092						1		2													0	7.1319	5	1
sp|O43592|XPOT_HUMAN	1	15	15	20.8	109.96					2	4	2	4	4	1	2	3	5	2	2		3	1	1	1	0	149.74	55	1
sp|O43598|DNPH1_HUMAN	1	2	2	20.1	19.108						1					1	1									0	13.222	3	1
sp|O43615|TIM44_HUMAN	1	9	9	17.3	51.355	2	2		1	3	5	6	1	2	1	2										0	137.09	41	1
sp|O43617|TPPC3_HUMAN	1	4	4	20	20.274		1			1	2		1	4	1											0	18.43	15	1
sp|O43653|PSCA_HUMAN	1	2	2	22	12.912						1	1											1	1		0	11.214	11	1
sp|O43660|PLRG1_HUMAN	1	4	4	14	57.193									1		2	1	3								0	41.973	8	1
sp|O43670|ZN207_HUMAN	1	3	3	8.8	50.75	2	2	1		1	4	2	3	2									1	1		0	32.441	28	1
sp|O43674|NDUB5_HUMAN	1	1	1	7.9	21.75										1											0.0018023	2.6383	1	1
sp|O43678|NDUA2_HUMAN	1	2	2	31.3	10.921						1		1	1	1		1	1								0	22.141	6	1
sp|O43681|ASNA_HUMAN	1	5	5	20.4	38.792						1		1	1			1	2				1				0	11.758	9	1
sp|O43684|BUB3_HUMAN	1	6	6	12.8	37.154		1				1		2	2	3	1		1								0	30.598	21	1
sp|O43707|ACTN4_HUMAN;sp|Q08043|ACTN3_HUMAN	2	41;5	29;0	52.3	104.85	14	19	14	15	34	30	37	35	28	16	7	10	3	2	4	8	5	6	6	5	0	323.31	826	1
sp|O43708|MAAI_HUMAN	1	2	2	15.7	24.212										2	3	1	2	1							0	14.644	14	1
sp|O43719|HTSF1_HUMAN	1	4	4	8.3	85.852					3	1		2	1												0	74.788	6	1
sp|O43739|CYH3_HUMAN	1	2	1	5.2	46.348								1				1		1							0.0036801	2.0957	4	1
sp|O43747|AP1G1_HUMAN	1	8	8	14.8	91.35						1		1			1				1	1	3	2	1		0	49.498	33	1
sp|O43752|STX6_HUMAN	1	2	2	12.5	29.176							1	2													0	21.113	3	1
sp|O43760|SNG2_HUMAN	1	1	1	4.5	24.81	1															1	1	1			0	10.317	11	1
sp|O43766|LIAS_HUMAN	1	1	1	4.6	41.911															1						0	6.9139	2	1
sp|O43768|ENSA_HUMAN	1	2	2	14.9	13.389											1			1							0.0097928	1.3261	1	1
sp|O43772|MCAT_HUMAN	1	3	3	15	32.943									1		1	2	1	1							0	6.0395	11	1
sp|O43776|SYNC_HUMAN	1	6	6	15.7	62.942						1	2	2	1	1					1						0	32.592	7	1
sp|O43795|MYO1B_HUMAN;sp|Q9UBC5|MYO1A_HUMAN	2	4;1	4;1	5.5	131.98									1				1		1			1			0	8.5872	3	1
sp|O43805|SSNA1_HUMAN	1	1	1	10.9	13.596												1	1	1							0.0018027	2.6386	3	1
sp|O43809|CPSF5_HUMAN	1	6	6	22	26.227	2			1		2	1	2	1			2	3	1		2	2	2			0	183.3	62	1
sp|O43813|LANC1_HUMAN	1	2	2	8.8	45.283												2									0	21.869	2	1
sp|O43815|STRN_HUMAN	1	12	12	25.9	86.131					1	1	1	4	4	1	1	1		4							0	66.214	30	1
sp|O43818|U3IP2_HUMAN	1	2	2	5.5	51.84											1	1				3					0	3.9915	5	1
sp|O43823|AKAP8_HUMAN	1	3	3	8.8	76.107						1			1		1	1									0	3.1546	3	1
sp|O43824|GTPB6_HUMAN	1	2	2	5.6	56.883												1						1			0.0017857	2.5529	2	1
sp|O43837|IDH3B_HUMAN	1	5	5	21.8	42.183					1		1	2	2						1	2	2		1	2	0	32.734	26	1
sp|O43847|NRDC_HUMAN	1	8	8	7.7	131.57								1			2	2				1		1	2		0	22.356	10	1
sp|O43852|CALU_HUMAN	1	8	8	36.2	37.106					4	3	5	3													0	53.393	22	1
sp|O43865|SAHH2_HUMAN	1	3	1	6.6	58.951											1	1	1								0	9.074	5	1
sp|O43916|CHST1_HUMAN	1	1	1	3.6	46.714																		1	1		0.0092166	1.4438	2	1
sp|O43920|NDUS5_HUMAN	1	3	3	22.6	12.517							1	1			1										0	6.4007	4	1
sp|O43924|PDE6D_HUMAN	1	1	1	8	17.42							1														0	7.3499	1	1
sp|O60216|RAD21_HUMAN	1	12	12	25.2	71.689	1	1		1	1	3	4	2	6	1		1				1	1	2	1	1	0	106.87	34	1
sp|O60218|AK1BA_HUMAN	1	2	2	7.6	36.019															1		1				0.00080235	2.9778	2	1
sp|O60220|TIM8A_HUMAN	1	2	2	11.3	10.998									1		1	2									0	159.07	7	1
sp|O60232|SSA27_HUMAN	1	5	5	51.8	21.474						1	3	2			2		1	1							0	76.079	18	1
sp|O60245|PCDH7_HUMAN	1	1	1	1.5	116.07								1													0	7.2039	1	1
sp|O60256|KPRB_HUMAN	1	2	2	8.1	40.925														1			1				0	5.6241	2	1
sp|O60262|GBG7_HUMAN	1	1	1	23.5	7.5217								1													0	7.174	1	1
sp|O60264|SMCA5_HUMAN	1	14	11	13.9	121.9					1	2	3	2	1	2	1	1		2			2	1	1		0	43.537	23	1
sp|O60271|JIP4_HUMAN	1	6	6	8.5	146.2							1	3	1				1				1	1	1		0	23.857	10	1
sp|O60306|AQR_HUMAN	1	8	8	7.2	171.29							1	2		1		2	2	5	1						0	35.772	18	1
sp|O60313|OPA1_HUMAN	1	22	22	31.4	111.63	5	2	1	1	6	6	7	8	6	4	5	4			1	2	2	2	1		0	209.43	87	1
sp|O60341|KDM1A_HUMAN	1	11	11	22.1	92.902						1	1	2	2		1	1	1	2	1	1	1	4	3	2	0	25.167	38	1
sp|O60344|ECE2_HUMAN	1	1	1	1.4	99.772								1	1												0.0008	2.9564	2	1
sp|O60353|FZD6_HUMAN	1	3	3	6.9	79.291													1		1				1		0	5.1437	3	1
sp|O60437|PEPL_HUMAN	1	30	30	19.5	204.74	3	2			3	7	7	17	13					2			1	1	1	1	0	190.28	80	1
sp|O60449|LY75_HUMAN	1	4	4	3.9	198.31						1			1					1	1						0	4.6049	4	1
sp|O60476|MA1A2_HUMAN	1	1	1	1.7	73.003							1														0.0036568	2.0419	1	1
sp|O60488|ACSL4_HUMAN	1	5	3	8	79.187										1	1	1	2	2							0	5.197	8	1
sp|O60493|SNX3_HUMAN	1	1	1	8.6	18.762					1																0.0010585	2.908	1	1
sp|O60499|STX10_HUMAN	1	1	1	4	28.114					1	1	1														0.0010576	2.8914	3	1
sp|O60502|OGA_HUMAN	1	5	5	10.9	102.91	1					1	2		1				2								0	17.157	11	1
sp|O60506|HNRPQ_HUMAN	1	12	9	23.8	69.602		2		1	2	3	5	3	3		1	1	2	2	2			2			0	100.54	60	1
sp|O60508|PRP17_HUMAN	1	3	3	7.4	65.521								1					1	1							0	6.1931	3	1
sp|O60512|B4GT3_HUMAN	1	1	1	6.1	43.927										1											0	4.9926	1	1
sp|O60518|RNBP6_HUMAN	1	6	4	7.5	124.71						1		2			1	1									0	5.753	4	1
sp|O60547|GMDS_HUMAN	1	2	2	9.1	41.949											1				1						0	5.8212	4	1
sp|O60568|PLOD3_HUMAN	1	11	11	20.1	84.784	1	1	1		3	3		6	5	1	1	1		2	1						0	62.011	41	1
sp|O60573|IF4E2_HUMAN	1	1	1	5.3	28.362												1	1								0.0017885	2.563	2	1
sp|O60610|DIAP1_HUMAN	1	19	19	20.6	141.35	1	1			4	7	7	9	7		3	6	4	3	1	1					0	125.62	78	1
sp|O60613|SEP15_HUMAN	1	3	3	23.5	17.79					1	2	1	1										1			0	9.0469	8	1
sp|O60645|EXOC3_HUMAN	1	7	7	9.7	86.844									1	1		2		1							0	12.024	8	1
sp|O60664|PLIN3_HUMAN	1	15	15	54.1	47.074	8	9	7	8	4	7	7	8	5		5	6	6	8	1	2	14	4	3	4	0	323.31	378	1
sp|O60678|ANM3_HUMAN	1	2	2	4.7	59.875								1							1						0	6.0588	5	1
sp|O60684|IMA7_HUMAN;sp|O15131|IMA6_HUMAN	2	10;6	5;2	25.2	60.029		1			1	1	2	2	1	1	3	4	5	3		2	1	2	1	2	0	101.79	67	1
sp|O60701|UGDH_HUMAN	1	4	4	14.4	55.023							2		1		1	3	3	2							0	8.8041	15	1
sp|O60716|CTND1_HUMAN	1	19	19	27.8	108.17	2					4	4	5	8	2	2	2	2	3	8	4	5	4	2		0	203.57	124	1
sp|O60725|ICMT_HUMAN	1	2	2	9.5	31.938															1			1		1	0	7.7179	6	1
sp|O60749|SNX2_HUMAN	1	10	8	13.1	58.47	2					1	2	2		1				2			1	2	1	1	0	65.459	32	1
sp|O60762|DPM1_HUMAN	1	4	4	16.5	29.634											1		1	1			1	1			0	7.9555	7	1
sp|O60763|USO1_HUMAN	1	17	17	24.4	107.89	1	1			2	4	5	5	3	1	1	1		4	1		2				0	125.15	43	1
sp|O60783|RT14_HUMAN	1	1	1	11.7	15.139							1	1													0.0020248	2.4509	2	1
sp|O60784|TOM1_HUMAN	1	8	8	31.9	53.818		1			1	3	6	2	1			1		2							0	65.347	26	1
sp|O60826|CCD22_HUMAN	1	8	8	16.9	70.755								2		1	1	1	1		1		1				0	13.246	7	1
sp|O60828|PQBP1_HUMAN	1	1	1	9.8	30.472													1								0.0020377	2.5275	1	1
sp|O60830|TI17B_HUMAN	1	1	1	12.8	18.273														1	1						0.002033	2.496	3	1
sp|O60832|DKC1_HUMAN	1	3	3	7.4	57.673					1	1												1	2	1	0	5.5555	7	1
sp|O60841|IF2P_HUMAN	1	10	10	12.7	138.83	1					2	1	1	1	1					4	2		1			0	48.146	30	1
sp|O60869|EDF1_HUMAN	1	1	1	8.1	16.368				1	1	1															0	19.582	3	1
sp|O60879|DIAP2_HUMAN	1	2	2	2.2	125.57								1										1			0	4.2249	2	1
sp|O60884|DNJA2_HUMAN	1	7	7	26.9	45.745		1	1	1	1	2	2	6	3	1											0	51.507	20	1
sp|O60885|BRD4_HUMAN	1	3	3	2.7	152.22																1	1	2	1	1	0	8.6257	11	1
sp|O60888|CUTA_HUMAN	1	3	3	25.7	19.116							1				2	4	1	2							0	26.972	36	1
sp|O60925|PFD1_HUMAN	1	2	2	17.2	14.21	1	1		1		2	2	3	2												0	20.21	15	1
sp|O60934|NBN_HUMAN	1	1	1	1.9	84.958									1												0.002275	2.4327	1	1
sp|O60936|NOL3_HUMAN	1	2	2	21.6	22.629							1	1			1										0	3.6405	4	1
sp|O60941|DTNB_HUMAN;sp|Q9Y4J8|DTNA_HUMAN	2	1;1	1;1	3	71.355								1													0.0061655	1.7185	1	1
sp|O75044|SRGP2_HUMAN;sp|P0DMP2|SRG2B_HUMAN;sp|P0DJJ0|SRG2C_HUMAN	3	4;2;2	4;2;2	7.3	120.88							1				1		1		1						0	15.807	5	1
sp|O75054|IGSF3_HUMAN	1	4	4	3.9	135.19								1						2		1					0	8.1482	4	1
sp|O75063|XYLK_HUMAN	1	2	2	8.1	46.432									1								1				0.0027322	2.238	2	1
sp|O75071|EFC14_HUMAN	1	2	2	5.3	55.031								1									1				0.00080085	2.9593	2	1
sp|O75083|WDR1_HUMAN	1	11	11	28.4	66.193	1					3	3	2	1	1	4	4	4	1		1	1	1	1		0	138.37	42	1
sp|O75116|ROCK2_HUMAN	1	8	5	6.8	160.9						1	3		1	1	1	2	1	1							0	105.73	14	1
sp|O75122|CLAP2_HUMAN	1	4	3	5	141.13														1	1			1			0	5.4854	3	1
sp|O75131|CPNE3_HUMAN	1	4	4	10.8	60.13							1					1	2	1		1	1	1			0	36.185	11	1
sp|O75146|HIP1R_HUMAN	1	5	5	7.3	119.39						1		2	2			1		2							0	8.55	8	1
sp|O75150|BRE1B_HUMAN	1	6	5	8.9	113.65							1	1	1	1											0	3.9487	4	1
sp|O75152|ZC11A_HUMAN	1	4	4	8.3	89.13									1	2				1	1		1			1	0	4.4804	6	1
sp|O75153|CLU_HUMAN;sp|Q9Y5I4|PCDC2_HUMAN	2	12;1	12;1	13.2	146.67						1	3		2	2	3	5	3	2							0	25.648	22	1
sp|O75157|T22D2_HUMAN	1	1	1	6.4	79.227																1					0.0070621	1.6355	1	1
sp|O75164|KDM4A_HUMAN	1	2	2	2.3	120.66							1		1												0	4.2474	2	1
sp|O75165|DJC13_HUMAN	1	10	10	5.5	254.41						1	1	2	1			1	2	1				2	1		0	28.977	15	1
sp|O75175|CNOT3_HUMAN	1	3	3	4.2	81.871							2							1							0	24.524	5	1
sp|O75179|ANR17_HUMAN	1	11	5	6.6	274.25					1		1	2			1	1			1	1				1	0	26.483	12	1
sp|O75190|DNJB6_HUMAN;sp|Q8WWF6|DNJB3_HUMAN	2	4;1	4;1	17.2	36.087						1	2	3	1		1	1	1	2							0	33.692	17	1
sp|O75208|COQ9_HUMAN	1	2	2	5.7	35.509											2	2	1								0	8.7765	7	1
sp|O75223|GGCT_HUMAN	1	2	2	11.2	21.007						1	1									1					0	13.532	8	1
sp|O75251|NDUS7_HUMAN	1	2	2	10.8	23.563							1	1		1	1		1								0	12.552	8	1
sp|O75298|RTN2_HUMAN	1	1	1	3.3	59.263																	1	2	1		0	4.0048	4	1
sp|O75306|NDUS2_HUMAN	1	10	10	31.1	52.545	2	1		1	1	3	3	3	4	1		1			1	1	1				0	103.31	33	1
sp|O75312|ZPR1_HUMAN	1	3	3	7.6	50.925								1			1	2	1	1							0	9.1222	9	1
sp|O75323|NIPS2_HUMAN	1	1	1	5.6	33.742															1						0	7.3316	6	1
sp|O75340|PDCD6_HUMAN	1	5	5	36.1	21.868	1	1		1			3	2	3	1	3	4	3	1							0	107.62	42	1
sp|O75347|TBCA_HUMAN	1	2	2	16.7	12.855								2	1												0	4.537	4	1
sp|O75348|VATG1_HUMAN;sp|O95670|VATG2_HUMAN	2	3;1	3;1	20.3	13.757								1									1				0	21.899	3	1
sp|O75351|VPS4B_HUMAN	1	5	4	15.5	49.301								1	2			1			1		1	2	2	1	0	29.9	18	1
sp|O75356|ENTP5_HUMAN	1	1	1	4.2	47.517										1											0.0098174	1.3509	1	1
sp|O75367|H2AY_HUMAN	1	4	4	19.6	39.617							1							1	1	1	1	1	1		0	34.361	18	1
sp|O75368|SH3L1_HUMAN	1	1	1	15.8	12.774													1								0.0043363	1.9074	1	1
sp|O75369|FLNB_HUMAN	1	90	84	52.8	278.16	23	24	20	30	44	49	42	50	44	29	33	26	21	20	12	4	13	15	10	7	0	323.31	1430	1
sp|O75376|NCOR1_HUMAN;sp|Q9H4R4|CT191_HUMAN	2	3;1	3;1	1.4	270.21											1	1			1						0	8.6105	7	1
sp|O75381|PEX14_HUMAN	1	4	4	14.6	41.236									3									1	1	5	0	13.773	43	1
sp|O75390|CISY_HUMAN	1	7	7	15.7	51.712	2	3	2	3	5	4	2	4		1	2	4	3	1				1	1	1	0	77.677	96	1
sp|O75394|RM33_HUMAN	1	2	2	38.5	7.6191											1	1			2						0	8.8672	7	1
sp|O75396|SC22B_HUMAN	1	4	4	21.4	24.593	1	1			1	3	4	3	4			1									0	40.755	28	1
sp|O75400|PR40A_HUMAN	1	9	9	15.3	108.8	1	1		1	1	3	4	2	1	2	1	3	3	1							0	55.164	30	1
sp|O75410|TACC1_HUMAN	1	1	1	1.9	87.793						1															0	3.2436	2	1
sp|O75431|MTX2_HUMAN	1	6	6	23.2	29.763				1	1	1	2								1	1	2	1	1		0	87.996	25	1
sp|O75436|VP26A_HUMAN	1	6	6	29.1	38.169						2		3	2			1	1								0	20.965	11	1
sp|O75439|MPPB_HUMAN	1	8	8	19.8	54.366	1					1	1	1	1	1	1	3	1								0	108.74	22	1
sp|O75448|MED24_HUMAN	1	1	1	1.4	110.3														1							0	3.6339	1	1
sp|O75449|KTNA1_HUMAN	1	1	1	2.9	55.964																	1				0.0022511	2.3106	1	1
sp|O75475|PSIP1_HUMAN	1	3	3	5.5	60.103									1		1		1								0	4.8602	4	1
sp|O75477|ERLN1_HUMAN	1	5	4	15.9	38.925									2	1	1	1	4								0	58.463	15	1
sp|O75487|GPC4_HUMAN	1	3	3	8.5	62.411										1		1						1	1	1	0	11.458	14	1
sp|O75489|NDUS3_HUMAN	1	8	8	31.4	30.241	1	4	1	4	5	5	4	5	4	2	1	2									0	146.34	53	1
sp|O75506|HSBP1_HUMAN	1	1	1	32.9	8.5435								1	1												0	4.124	3	1
sp|O75521|ECI2_HUMAN	1	8	8	29.9	43.585					1			2	3			1	1	1	1						0	21.363	13	1
sp|O75531|BAF_HUMAN	1	2	2	34.8	10.058				1	2	3	1	2													0	31.104	11	1
sp|O75533|SF3B1_HUMAN	1	25	25	27.1	145.83	2	2		1	2	5	9	6	2	1	1	6	4	6	9		1	2	3		0	323.31	134	1
sp|O75534|CSDE1_HUMAN	1	14	14	21.6	88.884					1	4	2		2	1	1			3	1	1	2	1			0	119.66	35	1
sp|O75554|WBP4_HUMAN	1	1	1	4.5	42.506											1	1									0	6.9929	2	1
sp|O75569|PRKRA_HUMAN	1	4	4	14.1	34.404									1			1		1							0	13.056	3	1
sp|O75607|NPM3_HUMAN	1	4	4	27	19.343	1	1	1	1	2	2	2	1				1									0	179.21	34	1
sp|O75608|LYPA1_HUMAN	1	4	4	20.9	24.669	1	1														1	3	3	2	2	0	51.634	53	1
sp|O75616|ERAL1_HUMAN	1	2	2	7.6	48.349									1			1									0	7.6046	2	1
sp|O75643|U520_HUMAN	1	29	29	17.6	244.5	1	1		1	3	10	10	12	11	1	1	4	5		2		1		1		0	180.95	93	1
sp|O75674|TM1L1_HUMAN	1	7	7	25	52.988							2	2	2	2	2	3									0	29.427	15	1
sp|O75676|KS6A4_HUMAN	1	4	3	5.3	85.605									1		1	1	2								0	3.6528	9	1
sp|O75688|PPM1B_HUMAN	1	1	1	3.8	52.642							1	2													0	8.8279	4	1
sp|O75691|UTP20_HUMAN	1	3	3	1.6	318.38										1				2							0	4.1545	3	1
sp|O75694|NU155_HUMAN	1	18	18	16.5	155.2						2	1	4	7		1	1	4		3		3	3	3	3	0	107.83	42	1
sp|O75695|XRP2_HUMAN	1	1	1	2.9	39.641														1							0.0013099	2.8013	1	1
sp|O75718|CRTAP_HUMAN	1	5	5	15	46.561								1	4			1						1			0	57.224	14	1
sp|O75746|CMC1_HUMAN	1	10	7	18.3	74.761								2	2		2	2	3				1				0	37.344	22	1
sp|O75787|RENR_HUMAN	1	2	2	5.1	39.008													1	1							0	4.1668	3	1
sp|O75792|RNH2A_HUMAN	1	2	2	11	33.395							1			1				1							0	7.049	4	1
sp|O75794|CD123_HUMAN	1	2	2	6.5	39.134									1										1		0.0094166	1.4114	2	1
sp|O75815|BCAR3_HUMAN	1	1	1	1.9	92.565													1								0.0022596	2.3516	1	1
sp|O75821|EIF3G_HUMAN	1	8	8	33.1	35.611		1			1	1	4	4	3												0	105.37	18	1
sp|O75822|EIF3J_HUMAN	1	4	4	17.8	29.062					1	2		2													0	34.984	6	1
sp|O75832|PSD10_HUMAN	1	4	4	18.1	24.428						1	1	2				1	1								0	26.888	9	1
sp|O75843|AP1G2_HUMAN	1	2	2	2.3	87.116								1	1												0	3.1748	2	1
sp|O75844|FACE1_HUMAN	1	2	2	4.2	54.812									1												0.0013004	2.7343	2	1
sp|O75874|IDHC_HUMAN	1	11	10	31.4	46.659						1	3	2			2	3		2			1	2	1		0	47.804	27	1
sp|O75879|GATB_HUMAN	1	4	4	11	61.863								1	1					2				1			0	16.721	17	1
sp|O75880|SCO1_HUMAN	1	1	1	5.3	33.814									1	1											0.0066257	1.6934	2	1
sp|O75882|ATRN_HUMAN	1	5	5	5.7	158.54														2		1		1			0	4.044	5	1
sp|O75886|STAM2_HUMAN	1	4	4	11.8	58.164								2	1		1	2	3	1							0	10.939	12	1
sp|O75891|AL1L1_HUMAN	1	4	3	5.3	98.828							1					1		1				1			0	5.8872	2	1
sp|O75907|DGAT1_HUMAN	1	1	1	3.9	55.278															1						0.009421	1.4139	1	1
sp|O75909|CCNK_HUMAN	1	3	3	9.7	64.239		1				1		1	1							1					0	9.4384	6	1
sp|O75911|DHRS3_HUMAN	1	2	2	9.9	33.548												1			1						0	6.8592	4	1
sp|O75915|PRAF3_HUMAN	1	2	2	14.9	21.614						1	1	1													0	4.5612	3	1
sp|O75934|SPF27_HUMAN	1	5	5	32.4	26.131				1	1	1	2	2	1												0	42.906	37	1
sp|O75935|DCTN3_HUMAN	1	1	1	10.8	21.119								1	1												0	10.276	3	1
sp|O75937|DNJC8_HUMAN	1	1	1	6.3	29.841	1					1	1	1													0	7.542	6	1
sp|O75940|SPF30_HUMAN	1	3	3	29	26.711								1	1			1	1								0	8.5561	4	1
sp|O75947|ATP5H_HUMAN	1	4	4	44.1	18.491		1			1	5	4	4	3		1	1									0	40.883	47	1
sp|O75955|FLOT1_HUMAN	1	9	9	22.2	47.355								1	3	2	1	2		2			4	3	2	2	0	47.781	47	1
sp|O75962|TRIO_HUMAN;sp|O60229|KALRN_HUMAN	2	13;2	13;2	5.8	346.9					1		1	2	3			1			1		1	2	1		0	31.274	22	1
sp|O75964|ATP5L_HUMAN	1	2	2	19.4	11.428	1	1				1	1		1												0	4.4323	5	1
sp|O75976|CBPD_HUMAN	1	15	15	10.9	152.93	1	1			1	2	3	4	4	1		2	2	1		1	1	1			0	73.081	44	1
sp|O76003|GLRX3_HUMAN	1	9	9	22.1	37.432	2	1			1	2	3	2	1	2	2	1	2	1			2	2			0	73.349	60	1
sp|O76021|RL1D1_HUMAN	1	4	4	9.2	54.972								1								1	1	1	2	1	0	8.4025	9	1
sp|O76027|ANXA9_HUMAN	1	2	2	6.1	38.363								2						1							0.0036828	2.104	3	1
sp|O76031|CLPX_HUMAN	1	10	10	19.6	69.223								1		1	2	4		1	1	1	2	1	1		0	32.601	23	1
sp|O76054|S14L2_HUMAN;sp|Q9UDX4|S14L3_HUMAN	2	2;1	2;1	10.7	46.145							1		1												0	6.6215	3	1
sp|O76070|SYUG_HUMAN	1	5	5	41.7	13.331	5	3	2		2	2	2	4	6		1	1	2								0	159.39	50	1
sp|O76071|CIAO1_HUMAN	1	2	2	10.3	37.84						1										1	1		1	1	0	6.6943	7	1
sp|O76094|SRP72_HUMAN	1	12	12	25.2	74.605		1			2	2	1	2	2	1	1	2	2	1	3	1		1			0	74.539	31	1
sp|O94760|DDAH1_HUMAN	1	3	2	13.3	31.121										1		1		2							0	5.9107	5	1
sp|O94763|RMP_HUMAN	1	5	5	14.8	59.832	1							1	1		1				1						0	5.5581	5	1
sp|O94766|B3GA3_HUMAN	1	4	4	24.2	37.121								1					1				1	1		1	0	11.642	5	1
sp|O94776|MTA2_HUMAN	1	2	2	3.9	75.022						1	1														0.0022642	2.3568	4	1
sp|O94804|STK10_HUMAN	1	2	2	1.2	112.13														1							0	3.1729	3	1
sp|O94826|TOM70_HUMAN	1	16	16	34.7	67.454		1		2	3	5	6	6	8	4	6	3		1		5	3	5	2	1	0	323.31	180	1
sp|O94830|DDHD2_HUMAN	1	1	1	1.4	81.031												1									0.0057075	1.7525	1	1
sp|O94832|MYO1D_HUMAN	1	1	1	1.3	116.2												1									0.0059354	1.7266	1	1
sp|O94842|TOX4_HUMAN	1	5	5	18.2	66.194						1	1										4	2	3	2	0	27.459	19	1
sp|O94854|K0754_HUMAN	1	6	6	6.8	135.15	1					2	2					1	1								0	18.595	6	1
sp|O94855|SC24D_HUMAN	1	3	3	4.6	113.01										1	1		1	1							0	19.598	5	1
sp|O94864|ST65G_HUMAN	1	1	1	1.9	46.192											1										0.0096066	1.3747	2	1
sp|O94874|UFL1_HUMAN	1	16	16	20.9	89.594					1	1	2	3	3	1	3	3	1	3		1	1		1	1	0	61.776	38	1
sp|O94880|PHF14_HUMAN	1	2	2	3.3	100.05								1								1	1				0.00079787	2.9356	3	1
sp|O94886|CSCL1_HUMAN	1	1	1	1.4	92.125																1	1				0.0040984	1.9126	2	1
sp|O94887|FARP2_HUMAN	1	2	2	3.3	119.89							1							1							0.0098017	1.3407	2	1
sp|O94888|UBXN7_HUMAN	1	6	6	16.2	54.862						1	2	1			2	4	1	2							0	40.115	16	1
sp|O94901|SUN1_HUMAN	1	11	11	16.9	90.063							2	4	3	1	1	2	1	2	2						0	63.438	30	1
sp|O94903|PROSC_HUMAN	1	2	2	9.5	30.344									1			1	1								0.0034525	2.1515	3	1
sp|O94905|ERLN2_HUMAN	1	10	9	22.7	37.839	1	1	1	1	1	3	5	5	3	1	1	1	3	2							0	71.932	46	1
sp|O94906|PRP6_HUMAN	1	8	8	9.6	106.92		2			1	3	4	2	1	1	2	1		1							0	30.711	33	1
sp|O94925|GLSK_HUMAN	1	10	10	18.4	73.46	1	1							4	2	2	2	1	1		3	1			1	0	69.997	28	1
sp|O94927|HAUS5_HUMAN	1	3	3	6.2	71.682													1	1				1			0	4.221	3	1
sp|O94966|UBP19_HUMAN	1	2	2	1.8	145.65													1				1				0	3.8735	2	1
sp|O94973|AP2A2_HUMAN	1	13	9	15.8	103.96						1			3	1	3	3	2	3		2	2	2	1		0	110.87	48	1
sp|O94979|SC31A_HUMAN	1	13	13	13.7	133.01		1				2	3	3	2	2	4	3	2	3	2	1					0	154.66	47	1
sp|O94992|HEXI1_HUMAN	1	2	2	10.9	40.623								1		1											0	11.224	3	1
sp|O95049|ZO3_HUMAN	1	1	1	2.3	101.4									1												0	11.548	1	1
sp|O95070|YIF1A_HUMAN	1	1	1	5.1	32.011											1	1									0	4.4901	2	1
sp|O95071|UBR5_HUMAN	1	18	18	9.6	309.35					1		1	1	1		1	5	2	3	1	1	3	3			0	41.836	26	1
sp|O95104|SFR15_HUMAN	1	4	3	7.7	125.87								1				1	1	1							0	9.8185	3	1
sp|O95159|ZFPL1_HUMAN	1	2	2	5.8	34.114									1												0.0083701	1.5298	2	1
sp|O95163|ELP1_HUMAN	1	2	2	1.6	150.25													2								0	5.1427	2	1
sp|O95168|NDUB4_HUMAN	1	2	2	21.7	15.208	1						1				1	1	1	1							0	11.745	8	1
sp|O95169|NDUB8_HUMAN	1	3	3	21	21.766							1			1	2	1	1								0	4.903	7	1
sp|O95171|SCEL_HUMAN	1	2	2	6.2	77.551								1										1		1	0.0041093	1.9517	3	1
sp|O95182|NDUA7_HUMAN	1	2	2	11.5	12.551													1								0	3.5395	2	1
sp|O95197|RTN3_HUMAN	1	1	1	3.8	112.61									1	1											0	30.862	3	1
sp|O95202|LETM1_HUMAN	1	17	17	29.5	83.353	2	1		1	2	4	5	11	6	5	1		2								0	147.93	69	1
sp|O95208|EPN2_HUMAN	1	2	2	4.2	68.481													1				1				0	6.1374	2	1
sp|O95218|ZRAB2_HUMAN	1	1	1	3.3	37.404											1	1	1								0	5.0512	3	1
sp|O95219|SNX4_HUMAN	1	3	3	6.9	51.908								1	1			1									0.00027078	3.1022	2	1
sp|O95249|GOSR1_HUMAN	1	5	5	23.6	28.612									2					1	1		1				0	12.396	5	1
sp|O95251|KAT7_HUMAN	1	2	2	2.5	70.642								1													0	5.7027	2	1
sp|O95292|VAPB_HUMAN	1	6	5	34.2	27.228	1				1	1		1	1	4	1	2	1	2	1	2	2	1	2	2	0	56.158	64	1
sp|O95295|SNAPN_HUMAN	1	2	2	17.6	14.874						1						1	1	1							0	4.6301	4	1
sp|O95297|MPZL1_HUMAN	1	2	2	10.4	29.082							1	1						1							0	7.4571	10	1
sp|O95299|NDUAA_HUMAN	1	2	2	6.5	40.75					1	1		1	1												0	6.5718	4	1
sp|O95302|FKBP9_HUMAN	1	4	4	9.1	63.083		1							1		2	3	1								0	15.595	12	1
sp|O95336|6PGL_HUMAN	1	8	8	41.5	27.547							1	1	1	1	1	2	2	1				7	1		0	41.351	22	1
sp|O95347|SMC2_HUMAN	1	12	12	14.6	135.65						1		4	2	2		3	1	1			1	1	1	1	0	28.633	23	1
sp|O95352|ATG7_HUMAN	1	3	3	6.1	77.959								1							1		1	1	1		0	4.0198	5	1
sp|O95361|TRI16_HUMAN	1	3	3	9.2	63.954							1		1					1							0	13.153	3	1
sp|O95365|ZBT7A_HUMAN	1	3	3	10.3	61.438						1		1										1			0	4.125	3	1
sp|O95372|LYPA2_HUMAN	1	1	1	7.8	24.737														1							0	5.808	4	1
sp|O95373|IPO7_HUMAN	1	18	18	21.8	119.52	4	1		2	5	7	9	9	7		2	4	3				1	3	2	1	0	221.32	123	1
sp|O95376|ARI2_HUMAN	1	1	1	3.2	57.818							2														0.0018004	2.6291	2	1
sp|O95389|WISP3_HUMAN	1	1	1	3.1	39.293	1																				0.0022539	2.3275	1	1
sp|O95394|AGM1_HUMAN	1	3	3	6.8	59.851									1	1											0	6.9689	3	1
sp|O95407|TNF6B_HUMAN	1	1	1	5.3	32.679									1												0	3.2927	1	1
sp|O95425|SVIL_HUMAN	1	5	5	3.9	247.74							1			2		1		1							0	13.434	4	1
sp|O95433|AHSA1_HUMAN	1	4	4	23.4	38.274		1			1	1	1	2	2												0	12.073	9	1
sp|O95453|PARN_HUMAN	1	5	5	10.5	73.45						2	1	2			1		1								0	6.2787	9	1
sp|O95456|PSMG1_HUMAN	1	2	2	8.3	32.854						1	1				1	1									0	7.6425	6	1
sp|O95470|SGPL1_HUMAN	1	4	4	11.6	63.523											1	1		3							0	12.326	10	1
sp|O95471|CLD7_HUMAN	1	2	2	15.6	22.418											1	1		2							0	34.183	5	1
sp|O95479|G6PE_HUMAN	1	9	9	12.6	88.892								1	2	1		1				1	1	2		1	0	29.406	17	1
sp|O95486|SC24A_HUMAN	1	7	6	8.4	119.75							2	1			1	2		1		1					0	11.666	9	1
sp|O95487|SC24B_HUMAN	1	6	5	7.1	137.42										1		1	1		1	1					0	9.1639	6	1
sp|O95490|AGRL2_HUMAN	1	4	4	2.9	163.35	1						1				1										0	5.5906	4	1
sp|O95551|TYDP2_HUMAN	1	1	1	2.5	40.929									1												0.0087983	1.4951	1	1
sp|O95571|ETHE1_HUMAN	1	6	6	36.2	27.873	3	2	2	2	2	2	3	5	4	1						4	2	3	1	2	0	40.628	66	1
sp|O95573|ACSL3_HUMAN	1	14	12	23.2	80.419	1	1			2	1	2	4		1	2	2	2		2		3	3			0	68.069	48	1
sp|O95602|RPA1_HUMAN	1	2	2	1.8	194.81						1								1							0.0036612	2.0537	2	1
sp|O95613|PCNT_HUMAN	1	4	4	1.6	378.03								1	1	1			1								0	4.2355	4	1
sp|O95630|STABP_HUMAN	1	2	2	8.3	48.076											1		1				1	2			0	8.4622	4	1
sp|O95639|CPSF4_HUMAN	1	3	3	16.7	30.255								1	1			1									0	23.514	3	1
sp|O95671|ASML_HUMAN	1	4	4	6.3	68.856							1		1	1							1	1	1		0	14.5	8	1
sp|O95716|RAB3D_HUMAN	1	1	1	5	24.267																	1	1	1	1	0	3.5898	9	1
sp|O95721|SNP29_HUMAN	1	4	4	8.1	28.97								1													0	18.869	6	1
sp|O95747|OXSR1_HUMAN	1	5	5	12.1	58.022	1					2			1	1		1						1	1	1	0	26.403	15	1
sp|O95757|HS74L_HUMAN	1	10	7	18	94.511						1	3				2	3	1				1				0	20.73	11	1
sp|O95758|PTBP3_HUMAN	1	6	5	22.3	59.689						1				1	5	4		2							0	40.388	13	1
sp|O95777|LSM8_HUMAN	1	2	2	35.4	10.403					1	1	1	1													0	11.677	5	1
sp|O95782|AP2A1_HUMAN	1	21	17	32	107.54	1					1	1	9	8	1	1	3	1	2	1		1	2	2	2	0	95.325	73	1
sp|O95793|STAU1_HUMAN	1	8	8	20.3	63.182	1							1	1			2	1	1						2	0	25.365	19	1
sp|O95807|TM50A_HUMAN	1	1	1	5.1	17.4							1														0.00053662	3.0103	3	1
sp|O95810|SDPR_HUMAN	1	8	8	25.2	47.173	2	2		1	2	3	6	6	1	2	1	4									0	130.05	67	1
sp|O95816|BAG2_HUMAN	1	4	4	22.7	23.772	1	1		1		1	1	1	1	1			3	2							0	37.677	16	1
sp|O95817|BAG3_HUMAN	1	5	5	15.8	61.594	1	1			1	1	1	1		1					1			1	1	1	0	19.697	14	1
sp|O95831|AIFM1_HUMAN	1	10	10	22.3	66.9	1				2	1	5	1	5									1	1	2	0	51.538	32	1
sp|O95832|CLD1_HUMAN	1	2	2	14.7	22.744								2	2		1	1	1	1							0	11.529	9	1
sp|O95834|EMAL2_HUMAN	1	3	3	9.2	70.678														1	1		1	1			0	32.25	6	1
sp|O95857|TSN13_HUMAN	1	1	1	10.3	22.147										1											0	4.2176	3	1
sp|O95858|TSN15_HUMAN	1	2	2	10.5	33.165											1			1							0	9.2714	4	1
sp|O95861|BPNT1_HUMAN	1	1	1	3.9	33.392					1			1													0.0036639	2.0584	1	1
sp|O95865|DDAH2_HUMAN	1	3	2	15.8	29.644						1				1	1				1						0	9.517	6	1
sp|O95881|TXD12_HUMAN	1	4	4	22.1	19.206	1	1	1	1	1					1		1	1		7						0	23.263	19	1
sp|O95900|TRUB2_HUMAN	1	1	1	3.9	36.694								1													0.0070555	1.6301	1	1
sp|O95983|MBD3_HUMAN	1	3	3	13.4	32.844							2	3	2							1		1	1	1	0	25.577	17	1
sp|O95994|AGR2_HUMAN;sp|Q8TD06|AGR3_HUMAN	2	5;1	5;1	26.3	19.979					1	2	4	3	1		1	1	2								0	40	23	1
sp|O96000|NDUBA_HUMAN	1	5	5	32.6	20.776						2	2	1					1	1			1	1	1		0	11.913	18	1
sp|O96005|CLPT1_HUMAN	1	3	3	6.6	76.096							1	1	1				1								0	11.24	42	1
sp|O96008|TOM40_HUMAN	1	9	9	40.4	37.893					3	3	6	9	9	1	1										0	202.14	59	1
sp|O96011|PX11B_HUMAN	1	2	2	8.5	28.431								1							1						0	3.8142	2	1
sp|O96013|PAK4_HUMAN;sp|Q9P286|PAK7_HUMAN	2	5;1	5;1	20.3	64.071										1	1		1	1	2	1	1				0	13.055	17	1
sp|O96018|APBA3_HUMAN	1	2	2	6.6	61.453															1			1			0.001059	2.9125	4	1
sp|O96019|ACL6A_HUMAN;sp|O94805|ACL6B_HUMAN	2	8;2	8;2	22.1	47.46	1					1		3	1	1	2	4	4	1			1				0	52.31	23	1
sp|P00167|CYB5_HUMAN	1	1	1	9.7	15.33	1					1	1	1	2												0	4.542	7	1
sp|P00338|LDHA_HUMAN	1	10	10	31.6	36.688	2	8	4	5	5	5	7	2	4		3	2	1	1		1				1	0	191.01	207	1
sp|P00367|DHE3_HUMAN;sp|P49448|DHE4_HUMAN	2	14;7	14;7	31	61.397	1	2			1	7	6	4	3	3	5	4				1	1		1		0	141.74	62	1
sp|P00387|NB5R3_HUMAN	1	6	6	24.3	34.234	1					1	1	4	1			2	1			1	2		1		0	33.324	20	1
sp|P00390|GSHR_HUMAN	1	7	7	23.4	56.256							1	1	1	2		2				1	2	2		1	0	65.679	30	1
sp|P00403|COX2_HUMAN	1	4	4	24.7	25.565		2	1			1	4	2		1	1	1	2	3	2						0	35.661	41	1
sp|P00441|SODC_HUMAN	1	2	2	15.6	15.936	2	2	1	2	3	2	1	3	3	1		1									0	56.716	29	1
sp|P00450|CERU_HUMAN	1	9	9	21.9	122.2							2	3	4	2	2	2	2	5	4	1	3	1	3	6	0	29.897	58	1
sp|P00491|PNPH_HUMAN	1	8	8	37	32.118								3	2					1	1		2	1	1		0	57.057	19	1
sp|P00492|HPRT_HUMAN	1	3	3	15.6	24.579					1		1	1			1	1			1						0	6.1863	9	1
sp|P00505|AATM_HUMAN	1	13	13	28.6	47.517	5	5	4	5	4	4	4	5	4	2	2	1	2	3		2	5	4	2	2	0	323.31	182	1
sp|P00533|EGFR_HUMAN	1	20	19	23.7	134.28	4	4			2	5	5	3	1	1	4	10	6	4		2	2	2	1		0	161.93	102	1
sp|P00558|PGK1_HUMAN;sp|P07205|PGK2_HUMAN	2	16;2	16;2	44.8	44.614	2	3	3	3		6	5	9	8	4	8	10	7	6	1	1			1		0	323.31	165	1
sp|P00568|KAD1_HUMAN	1	2	2	13.4	21.635									1										1		0	3.4198	3	1
sp|P00738|HPT_HUMAN;sp|P00739|HPTR_HUMAN	2	6;1	6;1	30.3	45.205		1	2	2	2	1	2	2	2	2	2	3	2	1	2	2	2	4	3	3	0	81.855	183	1
sp|P00750|TPA_HUMAN	1	1	1	2.8	62.916																	1	1			0.0022704	2.4005	2	1
sp|P00751|CFAB_HUMAN	1	2	2	4.2	85.532							1	1	1					1	1		1				0	3.8618	6	1
sp|P00846|ATP6_HUMAN	1	1	1	4.4	24.817																			1	1	0.0013144	2.8388	5	1
sp|P00966|ASSY_HUMAN	1	1	1	3.2	46.53											1	1	1								0	9.0983	3	1
sp|P01009|A1AT_HUMAN	1	11	11	39.2	46.736		3	5	4	1	1	6	3	6	8	5	4	5	8	7	6	3	6	7	8	0	98.396	313	1
sp|P01011|AACT_HUMAN	1	8	8	24.3	47.65				1		1	3	2	2	1	1	1			1	1	2	2	1	2	0	28.328	25	1
sp|P01023|A2MG_HUMAN;sp|P20742|PZP_HUMAN	2	21;4	20;3	27.7	163.29		1	3	2	1		3	4	3	2	4	2	4	6	9	5	7	15	8	10	0	82.391	244	1
sp|P01024|CO3_HUMAN	1	23	22	24.6	187.15		3	5	1	1		7	7	6	7	4	5	4	8	6	7	6	9	9	10	0	123.05	201	1
sp|P01031|CO5_HUMAN	1	1	1	2.2	188.3																1			1	2	0.0097861	1.3182	11	1
sp|P01034|CYTC_HUMAN	1	1	1	11.6	15.799									1												0.0022681	2.3788	3	1
sp|P01111|RASN_HUMAN	1	6	2	47.1	21.229							1	1	2		1	3	1								0	25.091	13	1
sp|P01112|RASH_HUMAN	1	5	1	42.3	21.298											1	1	1								0	6.6787	3	1
sp|P01130|LDLR_HUMAN	1	3	3	5.9	95.375											1	2				1	1				0	8.1657	5	1
sp|P01833|PIGR_HUMAN	1	1	1	2.5	83.283							1														0	6.8648	1	1
sp|P01834|IGKC_HUMAN	1	5	5	80.2	11.609		3	2	1	2	1	4	3	5	2	7	4	5	4	6	3	6	5	6	5	0	28.052	171	1
sp|P01857|IGHG1_HUMAN;sp|P01860|IGHG3_HUMAN	2	10;3	6;1	52.4	36.105	1	2	3	3	4	1	2	7	6	5	9	8	8	10	9	11	7	8	7	10	0	230.21	252	1
sp|P01859|IGHG2_HUMAN	1	5	3	30.4	35.9	1	2	1	2	2	1	1	1	2		4	1	2	2	2	2	2	3	2	3	0	91.658	78	1
sp|P01876|IGHA1_HUMAN;sp|P01877|IGHA2_HUMAN	2	3;2	3;2	21.5	37.654		1	1	1	1		1	1	1	2	1	2	2		1	2	2	3	1	2	0	33.551	129	1
sp|P01892|1A02_HUMAN;sp|P30456|1A43_HUMAN;sp|P16189|1A31_HUMAN;sp|Q95604|1C17_HUMAN	4	7;3;3;3	0;0;0;0	30.1	40.921						1	1				1	1	1								0	13.359	9	1
sp|P02545|LMNA_HUMAN	1	20	20	31.5	74.139	12	7	8	11	9	9	10	11	8	9	3	5	3	3	2	2	3	3	3	2	0	323.31	440	1
sp|P02647|APOA1_HUMAN	1	13	13	40.4	30.777		1	1	1			3	1	3		4	1	2	5	8	4	5	7	5	5	0	59.347	74	1
sp|P02649|APOE_HUMAN	1	2	2	4.7	36.154							1														0	7.5127	2	1
sp|P02652|APOA2_HUMAN	1	3	3	48	11.175		3	3	2	3	2	2	2	3	3	3	3	2	4	4	5	4	4	5	4	0	116.45	348	1
sp|P02656|APOC3_HUMAN	1	1	1	16.2	10.852						1		2													0	7.3145	3	1
sp|P02671|FIBA_HUMAN	1	2	2	3.8	94.972							1					1			1			1			0.0068558	1.6817	4	1
sp|P02675|FIBB_HUMAN	1	4	4	19.8	55.928							1	1	2		1		2	1	2	2		3	2	2	0	5.3446	19	1
sp|P02679|FIBG_HUMAN	1	6	6	23	51.511		1	1	1			2	2	2		3			2	2	2	3	1	2	3	0	29.416	26	1
sp|P02763|A1AG1_HUMAN	1	4	3	26.4	23.511		1	1	2	1		1	2		1	1			1	3	2	2	1	1	2	0	9.2131	25	1
sp|P02765|FETUA_HUMAN	1	2	2	16.6	39.324								2	1	1							1	1	2	2	0	7.0504	37	1
sp|P02766|TTHY_HUMAN	1	2	2	34.7	15.887		1																	1	2	0	5.2058	3	1
sp|P02774|VTDB_HUMAN	1	2	1	10.3	52.963								1			1	1					1	1			0.0017839	2.5301	6	1
sp|P02786|TFR1_HUMAN	1	22	22	32.8	84.87	2	4	3	2	3	5	7	4	4	2	6	11	10	8	4	3	3	3	4	2	0	323.31	235	1
sp|P02787|TRFE_HUMAN	1	15	15	31.1	77.063	1	3	7	1	2	2	7	6	4	5	11	7	9	13	15	15	12	13	13	11	0	128.57	532	1
sp|P02790|HEMO_HUMAN	1	8	8	35.9	51.676		2	2	2	1		2	2	2	1	3	5	4	4	6	4	5	5	5	5	0	71.404	135	1
sp|P02792|FRIL_HUMAN	1	2	2	17.1	20.019								2	2						2	1					0	13.674	12	1
sp|P03886|NU1M_HUMAN	1	1	1	6	35.66														2							0.0024938	2.2805	3	1
sp|P03905|NU4M_HUMAN	1	1	1	2.2	51.58																		1	1		0.0020238	2.4441	2	1
sp|P03923|NU6M_HUMAN	1	1	1	8	18.622					1		1														0	5.6518	4	1
sp|P04040|CATA_HUMAN	1	13	13	24.3	59.755	1	1					1			3	2	2	2	1	1		2	1			0	51.116	41	1
sp|P04062|GLCM_HUMAN	1	4	4	12.1	59.716	1					1		1	2	1				2							0	26.124	22	1
sp|P04066|FUCO_HUMAN	1	2	2	4.7	53.688	2				1	2	2	1													0	6.2592	11	1
sp|P04075|ALDOA_HUMAN	1	14	12	47.8	39.42	5	5	3	6	7	7	8	6	7	3	10	10			2	1				1	0	323.31	156	1
sp|P04080|CYTB_HUMAN	1	5	5	70.4	11.139		2	1				1	1			1	2				1	3	4	3		0	107.1	83	1
sp|P04083|ANXA1_HUMAN	1	20	20	57.5	38.714	10	11	6	11	14	15	10	18	9	2	6	4	4	5	2	4	3	1	2	7	0	323.31	359	1
sp|P04150|GCR_HUMAN	1	3	3	5.7	85.658									1			1					1				0	9.2299	3	1
sp|P04156|PRIO_HUMAN	1	1	1	4.7	27.661										1											0	4.5564	2	1
sp|P04179|SODM_HUMAN	1	1	1	6.3	24.722										1	1			1							0	54.546	4	1
sp|P04181|OAT_HUMAN	1	11	11	36.7	48.534	3				3	2	7	7	5	3	1			4	3		1	1	2	1	0	73.463	94	1
sp|P04217|A1BG_HUMAN	1	1	1	3.8	54.253																	1				0.0095956	1.3613	1	1
sp|P04220|MUCB_HUMAN;sp|P01871|IGHM_HUMAN	2	4;3	4;3	23.3	43.057		3	3	2			4	4	1	1	3	2	3	3	3	1	1	4	4	1	0	75.506	64	1
sp|P04233|HG2A_HUMAN	1	1	1	4.7	33.515												1	2	1							0	4.1041	7	1
sp|P04350|TBB4A_HUMAN	1	13	1	43.5	49.585													1								0	6.6087	1	1
sp|P04406|G3P_HUMAN	1	15	15	61.2	36.053	4	4	6	6	6	9	13	7	8	2	7	16	9	7	7	2	3	4	4	4	0	323.31	480	1
sp|P04424|ARLY_HUMAN	1	3	3	9.3	51.657									1				2	1	1						0	9.1436	5	1
sp|P04626|ERBB2_HUMAN;sp|Q15303|ERBB4_HUMAN	2	5;2	4;1	4.9	137.91							1					2			2						0	12.446	13	1
sp|P04632|CPNS1_HUMAN;sp|Q96L46|CPNS2_HUMAN	2	6;1	6;1	47	28.315							3	3	3	3	1					1	2	1	1	1	0	116.02	52	1
sp|P04792|HSPB1_HUMAN	1	8	8	62	22.782	6	5	4	4	3	4	6	6	9	2	3	2	1	3	1	1	1	1	1	1	0	323.31	134	1
sp|P04843|RPN1_HUMAN	1	15	15	26.9	68.569	4	6	1	2	2	4	4	7	2	1	6	5	4	5	3		1	2	2	1	0	190.07	135	1
sp|P04844|RPN2_HUMAN	1	13	13	37.4	69.283	3	4	2	2	4	3	3	9	4		3	7				1	2	2	2	2	0	323.31	123	1
sp|P04899|GNAI2_HUMAN	1	10	7	39.4	40.45	2	3	3	4	3	5	3	5				1	1	3	4	1		2	2		0	285.93	94	1
sp|P05023|AT1A1_HUMAN;sp|P50993|AT1A2_HUMAN;sp|Q13733|AT1A4_HUMAN;sp|P54707|AT12A_HUMAN;sp|P20648|ATP4A_HUMAN	5	23;9;6;3;2	11;0;0;0;0	24	112.89	8	8	5	3	8	5	11	10	2	3	6	7	6	3	2	6	4	3	4	3	0	323.31	278	1
sp|P05026|AT1B1_HUMAN	1	5	5	26.1	35.061		1			2	1					1	1	1	1		2	3	4	4	2	0	130.95	153	1
sp|P05067|A4_HUMAN	1	4	4	9.1	86.942								2	2									1	1		0	34.457	5	1
sp|P05091|ALDH2_HUMAN	1	15	15	35.6	56.381		1			1	2	2	5	5		2	2	2	2			1	5	5	2	0	87.403	76	1
sp|P05107|ITB2_HUMAN	1	1	1	1.8	84.781									1												0.0052745	1.8438	1	1
sp|P05141|ADT2_HUMAN;sp|Q9H0C2|ADT4_HUMAN	2	9;1	6;0	23.2	32.852	2	3	1	2	2	2	6	4	2	1	3	4	5	3	1	1	2	1	1	1	0	112.75	120	1
sp|P05161|ISG15_HUMAN	1	2	2	20	17.887							1				1	2	1	2							0	16.181	10	1
sp|P05165|PCCA_HUMAN	1	6	6	10.4	80.058												1	2		1		1				0	11.054	9	1
sp|P05166|PCCB_HUMAN	1	5	5	7.2	58.215							1	2													0	13.975	4	1
sp|P05198|IF2A_HUMAN	1	6	6	16.5	36.112					1	2	2		1		1	4	3								0	36.891	24	1
sp|P05362|ICAM1_HUMAN	1	13	13	22	57.825	7	8	6	8	6	6	6	9	7	3	1	3	3	4	4	2	1	2	2	2	0	323.31	246	1
sp|P05386|RLA1_HUMAN	1	2	2	51.8	11.514				2	2	1	1	3	2		2	3	2	1	1						0	82.402	83	1
sp|P05387|RLA2_HUMAN	1	8	8	73.9	11.665	6	8	5	4	8	8	8	7	7	4	3	2	2	2	1	2	2	2			0	323.31	282	1
sp|P05388|RLA0_HUMAN;sp|Q8NHW5|RLA0L_HUMAN	2	9;5	9;5	45.1	34.273	4	6	3	4	4	5	4	6	9	3	5	2	2	3	3	2	2	3	1		0	229.18	194	1
sp|P05455|LA_HUMAN	1	6	6	11.8	46.836	1	1				1	3	3	2	1	1		1	1							0	15.275	29	1
sp|P05534|1A24_HUMAN;sp|P30447|1A23_HUMAN;sp|Q29960|1C16_HUMAN;sp|Q9TNN7|1C05_HUMAN	4	7;6;3;2	0;0;0;0	29	40.688								1													0	8.7929	2	1
sp|P05556|ITB1_HUMAN	1	12	12	22.4	88.414	3	3	2	3	1	5	3	4	5	2	5	5	4	2	3	2	1	2	1		0	323.31	249	1
sp|P05783|K1C18_HUMAN;CON__H-INV:HIT000015463	2	16;1	11;1	49.1	48.057	2	10	7	11	15	16	19	18	9	8	6	9	9	13	1		1		1	2	0	323.31	449	1
sp|P05976|MYL1_HUMAN;sp|P08590|MYL3_HUMAN	2	1;1	1;1	8.2	21.145						1	2	1	3	3											0	38.453	46	1
sp|P06132|DCUP_HUMAN	1	6	6	21	40.786							1	2	2		1		2				1	1			0	31.287	12	1
sp|P06276|CHLE_HUMAN	1	4	4	8.8	68.417						1	2				1	2	2	1							0	24.081	16	1
sp|P06280|AGAL_HUMAN	1	6	6	21.7	48.766							2	1	1							1	2	3	1	1	0	28.422	18	1
sp|P06400|RB_HUMAN	1	2	2	3.9	106.16								1										1			0.0013137	2.8331	2	1
sp|P06454|PTMA_HUMAN	1	2	2	15.3	12.203	1			1			2														0	114.4	28	1
sp|P06493|CDK1_HUMAN	1	6	6	20.2	34.095					1	1	1	2	2												0	20.921	10	1
sp|P06576|ATPB_HUMAN	1	18	18	49.7	56.559	6	14	11	12	11	14	13	23	22	11	9	16	16	11	5	4	1			1	0	323.31	562	1
sp|P06702|S10A9_HUMAN	1	1	1	13.2	13.242							1	2	1		1		2		1				1		0	4.1601	9	1
sp|P06730|IF4E_HUMAN	1	1	1	3.2	25.097																	1	1	1		0.0057116	1.7616	9	1
sp|P06733|ENOA_HUMAN	1	20	17	62.7	47.168	5	9	11	12	13	10	17	15	14	6	8	6	5	6	4	2	1	2	3	4	0	323.31	550	1
sp|P06737|PYGL_HUMAN	1	13	11	19	97.147	2	4				3	3	4	2			3	4	1							0	41.903	42	1
sp|P06744|G6PI_HUMAN	1	10	6	26.9	63.146	1	1					2		1	2	1	1	1	2	4	2	2	2	4	3	0	93.471	86	1
sp|P06746|DPOLB_HUMAN	1	2	2	7.2	38.177							1								1						0.0036846	2.11	2	1
sp|P06748|NPM_HUMAN	1	6	6	40.1	32.575			1	1	2	4	7	5	5		3	4	2	2	1						0	323.31	114	1
sp|P06753|TPM3_HUMAN	1	6	4	14.4	32.95	2	2	2	2	2	3	4	5	5	3	1	1	1		1						0	245.77	83	1
sp|P06756|ITAV_HUMAN	1	12	12	16.4	116.04		1				1	4	5	1	1	3	6	3	1			2	1			0	117.3	39	1
sp|P06865|HEXA_HUMAN	1	8	8	19.1	60.702		1			1			1	3		2		1	2	2	1	1	1	1		0	42.007	49	1
sp|P07099|HYEP_HUMAN	1	4	4	5.7	52.948							1			1	1	2	1								0	5.6258	11	1
sp|P07108|ACBP_HUMAN	1	2	2	32.2	10.044								2	1												0	6.1202	4	1
sp|P07199|CENPB_HUMAN	1	3	3	8.8	65.171						1	2	2					2								0	7.2769	7	1
sp|P07203|GPX1_HUMAN	1	3	3	18.7	22.088							1				1							1	1		0	8.0181	9	1
sp|P07225|PROS_HUMAN	1	2	2	4.3	75.122									1								1				0	8.3151	2	1
sp|P07237|PDIA1_HUMAN	1	20	20	51.8	57.116	7	7	7	9	4	12	10	10	8	3	6	5	4	2	1		1	1	1		0	323.31	362	1
sp|P07305|H10_HUMAN	1	1	1	6.7	20.863							1		2												0	3.2421	3	1
sp|P07339|CATD_HUMAN	1	11	11	33.7	44.552	2	1		3	4	6	6	3	5		4	4	4	3			1			1	0	148.67	157	1
sp|P07355|ANXA2_HUMAN;sp|A6NMY6|AXA2L_HUMAN	2	22;16	22;16	50.4	38.604	8	18	15	17	15	20	21	13	10	3	6	9	4	2	1						0	323.31	580	1
sp|P07384|CAN1_HUMAN	1	15	15	24.4	81.889		1				3	4	3	3	2	4	3	3	1	1	3	2	3			0	108.25	61	1
sp|P07437|TBB5_HUMAN	1	16	4	52.5	49.67	2	5	2	2	4	5	4	4	3			1	1				1				0	97.051	87	1
sp|P07602|SAP_HUMAN	1	16	16	33.8	58.112	2	1	2	4	9	8	6	4	4	2	2	1	3	2				1	1	1	0	248.68	211	1
sp|P07686|HEXB_HUMAN	1	9	9	18.7	63.111		2					2	1		3	2	7	2	2	2						0	36.757	42	1
sp|P07737|PROF1_HUMAN;CON__P02584	2	8;3	8;3	75	15.054	3	3	6	7	7	5	7	2	3		3	4	3	2	1	4	3	2	3	2	0	323.31	219	1
sp|P07741|APT_HUMAN	1	8	8	65	19.608	1	1	1	1		3	4	5	1	1	2	3	3	2							0	131.35	65	1
sp|P07814|SYEP_HUMAN	1	22	22	22.3	170.59		1			6	6	5	6	10	4	3	2		1		4	5	5	2	1	0	224.56	127	1
sp|P07858|CATB_HUMAN	1	6	6	23.9	37.821					1	2	4	1	4	2					2						0	73.339	40	1
sp|P07900|HS90A_HUMAN;sp|Q14568|HS902_HUMAN;sp|Q58FG0|HS905_HUMAN;sp|Q58FG1|HS904_HUMAN	4	30;7;3;1	18;2;1;0	41.8	84.659	5	6	4	5	4	8	8	9	8	1	6	8	6	9	2	3	1	1	1		0	323.31	258	1
sp|P07902|GALT_HUMAN	1	2	2	6.9	43.363														1			1				0.0013038	2.7508	2	1
sp|P07910|HNRPC_HUMAN;sp|P0DMR1|HNRC4_HUMAN;sp|O60812|HNRC1_HUMAN;sp|B7ZW38|HNRC3_HUMAN;sp|B2RXH8|HNRC2_HUMAN	5	7;3;3;3;3	7;3;3;3;3	21.9	33.67	4	6	3	3	4	6	4	3	6	2				1	1	1	1	1	2	2	0	122.21	111	1
sp|P07919|QCR6_HUMAN	1	2	2	48.4	10.739									1				2	2	1						0	26.946	12	1
sp|P07942|LAMB1_HUMAN	1	11	11	10	198.04					2	3	1				2			1		1		1	2	1	0	52.399	28	1
sp|P07947|YES_HUMAN;sp|P12931|SRC_HUMAN;sp|P08631|HCK_HUMAN;sp|P06241|FYN_HUMAN	4	8;4;2;2	6;2;0;1	23.8	60.801							1	2				4	3	3							0	28.481	20	1
sp|P07948|LYN_HUMAN	1	5	3	8.8	58.573								1					1				1				0	6.1493	3	1
sp|P07954|FUMH_HUMAN	1	10	10	24.9	54.636	1	1			2	3	3	5	5	1	3	2	2	2			2	2	2	1	0	165.5	80	1
sp|P08047|SP1_HUMAN	1	2	2	7.5	80.692									1	1	1	2	2	1							0	37.291	17	1
sp|P08069|IGF1R_HUMAN	1	1	1	0.9	154.79																		1	1		0.00080021	2.9569	3	1
sp|P08133|ANXA6_HUMAN	1	19	19	36	75.872	3	3			5	8	10	10	4	3	2	1		1				1			0	105.83	80	1
sp|P08134|RHOC_HUMAN	1	5	1	22.3	22.006													1								0.0018018	2.6345	2	1
sp|P08174|DAF_HUMAN	1	2	2	8.1	41.4							1		1												0.002031	2.4872	2	1
sp|P08195|4F2_HUMAN	1	22	22	35.1	67.993	9	8	6	8	10	11	13	11	7	2	1	1	3	3	9	2	2	2	1	1	0	323.31	229	1
sp|P08236|BGLR_HUMAN	1	2	2	4.5	74.731											2	1		1							0	3.8441	4	1
sp|P08237|PFKAM_HUMAN	1	9	8	15.8	85.182									1	1	2	2	2	1		1	1				0	15.63	13	1
sp|P08238|HS90B_HUMAN;sp|Q58FF7|H90B3_HUMAN	2	31;11	16;5	41.4	83.263	10	14	13	13	16	18	15	13	16	16	14	16	12	4	2	1	1	1	1	2	0	323.31	630	1
sp|P08240|SRPR_HUMAN	1	8	8	15.8	69.81					1	1	1	1	1	2	2	3	2				1	1			0	51.687	24	1
sp|P08243|ASNS_HUMAN	1	9	9	26.7	64.369	1	1			1	2	2	3	4	2	4	6	4	4	1						0	88.429	83	1
sp|P08473|NEP_HUMAN	1	5	5	9.5	85.513							1	2	1		1	1				1					0	14.089	7	1
sp|P08559|ODPA_HUMAN	1	7	7	21.3	43.295	1	1			1	1	3	3		2	1	3	1	4	1	2	1	2	1		0	96.731	54	1
sp|P08574|CY1_HUMAN	1	3	3	8.6	35.422	1										2	1	2	5		1					0	13.847	25	1
sp|P08581|MET_HUMAN	1	13	13	14.2	155.54							1	6	2		1	1	2			1	1	2	1	1	0	43.531	26	1
sp|P08582|TRFM_HUMAN	1	11	11	24.5	80.214		1			2	2	3	7	6	2	4	4	4	1							0	157.16	48	1
sp|P08621|RU17_HUMAN	1	6	6	16.5	51.556					1		1	3			1										0	13.767	8	1
sp|P08648|ITA5_HUMAN	1	7	7	9.8	114.54					2	2	1	1			2	1	1			2	1	2	1		0	94.268	25	1
sp|P08670|VIME_HUMAN;sp|P41219|PERI_HUMAN;sp|Q16352|AINX_HUMAN;sp|P07197|NFM_HUMAN;sp|P07196|NFL_HUMAN;sp|P12036|NFH_HUMAN	6	29;2;2;2;1;1	25;2;0;0;0;0	57.1	53.651	7	9	11	9	12	18	31	24	30	10	4	5	5	6	1	7	6	3	2	2	0	323.31	605	1
sp|P08754|GNAI3_HUMAN	1	6	3	22	40.532		2					1	1	1	2	2	1	2	1							0	26.974	21	1
sp|P08758|ANXA5_HUMAN	1	14	14	55.6	35.936	4	5	2	4	6	11	10	7	6	2	1			2		2	2	2		1	0	323.31	152	1
sp|P08842|STS_HUMAN	1	3	3	8.4	65.492								1	1				2	1							0	5.9026	5	1
sp|P08865|RSSA_HUMAN	1	11	11	47.5	32.854	6	7	5	6	4	9	8	6	3	4	3	4	1	1		2	1	3	2	2	0	323.31	245	1
sp|P09001|RM03_HUMAN	1	2	2	4.3	38.632															1						0	3.9833	2	1
sp|P09012|SNRPA_HUMAN;sp|P08579|RU2B_HUMAN	2	4;1	4;1	24.5	31.279	1										1						2	1	1	1	0	57.414	20	1
sp|P09104|ENOG_HUMAN;sp|P13929|ENOB_HUMAN	2	9;3	6;0	35.7	47.268		1			2		2		1			1	2	1	1						0	26.077	14	1
sp|P09110|THIK_HUMAN	1	12	12	46.7	44.292		1		1			3	3	4	2	1	3				2	3	1	2	2	0	70.807	62	1
sp|P09132|SRP19_HUMAN	1	4	4	43.8	16.156						1	2	3				1				1	2	2			0	24.675	23	1
sp|P09211|GSTP1_HUMAN	1	9	9	52.9	23.356	1	8	4	8	8	8	8	1	2		3	2	2	2	1	1	3	4	6	3	0	323.31	219	1
sp|P09234|RU1C_HUMAN	1	2	2	18.9	17.394					1	1	1	1	1												0	20.768	5	1
sp|P09382|LEG1_HUMAN	1	6	6	70.4	14.716	1	1		3	7	4	6	5	2		2	2	2	2	5	3	3	4	3	2	0	305.42	181	1
sp|P09417|DHPR_HUMAN	1	5	5	34.4	25.789							2				1			2		1					0	24.685	8	1
sp|P09429|HMGB1_HUMAN;sp|B2RPK0|HGB1A_HUMAN;sp|P26583|HMGB2_HUMAN	3	4;3;1	4;3;1	20.9	24.893	1						1	2	2						2	2		1			0	87.88	36	1
sp|P09496|CLCA_HUMAN	1	2	2	3.6	27.076							1														0.0057293	1.7981	3	1
sp|P09525|ANXA4_HUMAN	1	7	7	24.5	35.882				1	1	2	5	3	1												0	48.891	20	1
sp|P09601|HMOX1_HUMAN	1	3	3	17.4	32.818									1			1	1								0	4.1931	2	1
sp|P09622|DLDH_HUMAN	1	5	5	14.3	54.177	1						2	3	1	2	1	1			6	2	2	2	2	2	0	60.43	72	1
sp|P09651|ROA1_HUMAN;sp|Q32P51|RA1L2_HUMAN	2	3;2	3;2	17.2	38.746								2			1										0	10.028	4	1
sp|P09661|RU2A_HUMAN	1	6	6	28.2	28.415	1				1	1	1	2	3	2			1			1	1				0	46.706	18	1
sp|P09668|CATH_HUMAN	1	3	3	7.5	37.393											1					1					0	3.861	9	1
sp|P09758|TACD2_HUMAN	1	3	3	18	35.709					2	2	3	2			1		2	6							0	173.43	32	1
sp|P09874|PARP1_HUMAN	1	18	18	23.7	113.08		1			1	1		8	3	3	2	3	2	2		1	2				0	59.259	46	1
sp|P09913|IFIT2_HUMAN	1	1	1	3	54.632												1									0.0013151	2.843	1	1
sp|P09958|FURIN_HUMAN	1	2	2	4.2	86.677							1					1									0.0036684	2.0745	2	1
sp|P09960|LKHA4_HUMAN	1	12	12	25	69.284		2		1	3	4	3	5	1	3	2	3	3	1							0	82.952	47	1
sp|P09972|ALDOC_HUMAN	1	11	9	38.5	39.455		1		1	1	2	4	5	5		1	2	1						1		0	109.94	39	1
sp|P0C0L5|CO4B_HUMAN;sp|P0C0L4|CO4A_HUMAN	2	10;10	10;10	12.8	192.75							2	3	1	1	1	2	2	4	3	1		4	6	1	0	38.883	51	1
sp|P0CG06|LAC3_HUMAN;sp|P0CG05|LAC2_HUMAN;sp|P0CG04|LAC1_HUMAN;sp|B9A064|IGLL5_HUMAN;sp|P0CF74|LAC6_HUMAN;sp|A0M8Q6|LAC7_HUMAN	6	2;2;2;2;1;1	2;2;2;2;1;1	33	11.237	1	1	1	3	2	2	1	2	3	2	1	2	1	2	3	2	2	2	2	3	0	37.595	267	1
sp|P0CW22|RS17L_HUMAN;sp|P08708|RS17_HUMAN	2	7;7	7;7	45.2	15.55				2	2	3	4	3	4		2	2	2	5	1						0	123.46	67	1
sp|P0DMN0|ST1A4_HUMAN;sp|P0DMM9|ST1A3_HUMAN	2	2;2	1;1	10.8	34.196														1							0.0088024	1.4967	1	1
sp|P0DMV9|HS71B_HUMAN;sp|P0DMV8|HS71A_HUMAN	2	20;20	11;11	41.5	70.051	8	10	6	9	9	8	13	10	7	1	4	7	3	3	8	1					0	323.31	252	1
sp|P10074|ZBT48_HUMAN	1	1	1	3.2	77.053										1											0.0052796	1.8522	1	1
sp|P10109|ADX_HUMAN	1	2	2	11.4	19.393						1	1	2		1											0	18.83	12	1
sp|P10155|RO60_HUMAN	1	5	5	14.3	60.67		1				1	1	2	1			1		2			1	1			0	16.955	14	1
sp|P10253|LYAG_HUMAN	1	10	10	16.3	105.32		2						1	3		7	6	3	3		3	3		1	1	0	140.06	64	1
sp|P10301|RRAS_HUMAN	1	4	3	22.9	23.48					1	2	4	2					1	1			1	1			0	16.526	18	1
sp|P10316|1A69_HUMAN;sp|P01891|1A68_HUMAN;sp|P30457|1A66_HUMAN;sp|P30453|1A34_HUMAN;sp|P30450|1A26_HUMAN;sp|P18462|1A25_HUMAN;sp|P16190|1A33_HUMAN	7	7;6;4;4;4;4;4	0;0;0;0;0;0;0	29.3	40.976								1													0	3.5876	1	1
sp|P10398|ARAF_HUMAN;sp|P04049|RAF1_HUMAN	2	4;2	3;1	11.1	67.585											1	1		2						1	0	3.9387	5	1
sp|P10412|H14_HUMAN;sp|P16402|H13_HUMAN;sp|P22492|H1T_HUMAN;sp|Q02539|H11_HUMAN	4	3;2;1;1	1;0;0;0	12.8	21.865	1	1	1		1		2							1							0	13.385	9	1
sp|P10515|ODP2_HUMAN	1	9	9	19.6	68.996	2	1		1	4	3	3	6	6		4	3	4	1			1	2	3	2	0	75.82	74	1
sp|P10586|PTPRF_HUMAN	1	5	5	5	212.88								1			2	2			1						0	9.7291	7	1
sp|P10599|THIO_HUMAN	1	4	4	31.4	11.737	2	3	2	1	1	1	1	2							1	6	1	1	1	1	0	49.548	84	1
sp|P10606|COX5B_HUMAN	1	4	4	34.1	13.696	2	2	1	2	1		1	3	1		1	1	1	1		1	2	2	1		0	38.363	71	1
sp|P10619|PPGB_HUMAN	1	2	2	5.4	54.465			1		1	2	1	1	1												0	44.056	7	1
sp|P10620|MGST1_HUMAN	1	3	3	19.4	17.598						1			1			1	2				1	1			0	14.664	12	1
sp|P10636|TAU_HUMAN	1	2	2	5.1	78.927							1								2						0	9.5289	10	1
sp|P10644|KAP0_HUMAN	1	6	6	17.6	42.981	2	1		1	3	3	4	4	1		2	1									0	107.08	33	1
sp|P10646|TFPI1_HUMAN	1	1	1	6.9	35.015								1													0.0013161	2.8431	1	1
sp|P10746|HEM4_HUMAN	1	2	2	5.7	28.627																	1				0	3.998	3	1
sp|P10768|ESTD_HUMAN	1	5	5	25.2	31.462							1	2					2	2		1	3	3	3	2	0	132.6	47	1
sp|P10809|CH60_HUMAN	1	34	34	70.9	61.054	8	14	21	24	26	32	39	46	25	4	3	4	2	4	13	7	5	2	4	3	0	323.31	960	1
sp|P10909|CLUS_HUMAN	1	1	1	5.1	52.494									1												0.0036855	2.1183	1	1
sp|P11021|GRP78_HUMAN	1	27	26	44.5	72.332	13	18	19	19	25	21	19	23	13	16	14	14	11	7	4	5	3	2	1	2	0	323.31	686	1
sp|P11047|LAMC1_HUMAN	1	9	9	5	177.6						1	2	2			1		1	1							0	49.473	10	1
sp|P11117|PPAL_HUMAN	1	2	2	4.5	48.344											1						1	1			0	5.284	5	1
sp|P11142|HSP7C_HUMAN	1	25	18	40.6	70.897	7	10	11	9	11	10	20	12	13	9	12	21	11	10	11	7	2	1	1	1	0	323.31	602	1
sp|P11171|41_HUMAN	1	2	2	3	97.016												1	1								0	6.0153	3	1
sp|P11172|UMPS_HUMAN	1	7	7	22.1	52.221						1		1			1			3	3	2					0	44.33	26	1
sp|P11177|ODPB_HUMAN	1	11	11	42.9	39.233	2	1	1	1	1	3	3	3	8	1	3	1	4	1		2	2	2	1		0	66.021	96	1
sp|P11182|ODB2_HUMAN	1	5	5	18.5	53.486							1		3		1	1					1	1			0	45.371	19	1
sp|P11216|PYGB_HUMAN;sp|P11217|PYGM_HUMAN	2	12;3	10;1	21.7	96.695	1	1				1	2	2	3		2	2			2						0	32.474	23	1
sp|P11233|RALA_HUMAN	1	3	2	14.1	23.567	1	1					2	2		1											0	10.455	9	1
sp|P11234|RALB_HUMAN	1	3	2	14.6	23.408								1					1								0	4.2053	2	1
sp|P11245|ARY2_HUMAN	1	1	1	3.4	33.542									1		1	2	1								0.002974	2.2222	7	1
sp|P11279|LAMP1_HUMAN	1	4	4	13.9	44.882									2	2	2	3						1	1	1	0	52.875	33	1
sp|P11310|ACADM_HUMAN	1	9	9	21.4	46.588		3	1		2	4	2	3	2	2	2	2	2	2							0	120.52	48	1
sp|P11387|TOP1_HUMAN;sp|Q969P6|TOP1M_HUMAN	2	12;2	12;2	14	90.725	2				1	1		1	1	2	2	2		2		1	2	2	1		0	58.849	44	1
sp|P11388|TOP2A_HUMAN	1	10	7	9.3	174.38							2	3	2		1	1	1	1	1	1	3	2			0	43.28	22	1
sp|P11413|G6PD_HUMAN	1	16	16	33.8	59.256		1	1		1	2	5	6	2	1	2	2	5	5			1	1	1	1	0	80.765	74	1
sp|P11441|UBL4A_HUMAN	1	1	1	9.6	17.776											1		1	1							0	4.0941	5	1
sp|P11498|PYC_HUMAN	1	12	12	15.2	129.63						1	2	4			4	3	2	2			1				0	60.635	26	1
sp|P11586|C1TC_HUMAN	1	18	18	26.2	101.56	3	2		2	4	4	10	3	2	1	1	1	1	1	1	3	4	2	4	2	0	241.42	141	1
sp|P11717|MPRI_HUMAN	1	26	26	13.6	274.37	2	1			3	4	7	4	3	1	4	5	5	4	1			1	1	1	0	175.14	99	1
sp|P11766|ADHX_HUMAN	1	6	6	34.2	39.724	2	1			1	3	4	4	4								2	2	2		0	67.594	51	1
sp|P11802|CDK4_HUMAN	1	1	1	5.3	33.729												1									0.0088004	1.4967	1	1
sp|P11908|PRPS2_HUMAN	1	5	2	22	34.769								1								1					0	5.3648	5	1
sp|P11940|PABP1_HUMAN;sp|Q9H361|PABP3_HUMAN;sp|Q4VXU2|PAP1L_HUMAN;sp|Q5JQF8|PAP1M_HUMAN;sp|Q96DU9|PABP5_HUMAN	5	18;7;3;1;1	13;6;2;1;1	37.6	70.67	2	4	3	3	2	3	3	4	4	5	3	3	3	7	3	3	5	6	3	3	0	178.99	168	1
sp|P12004|PCNA_HUMAN	1	7	7	40.2	28.768	1	1		3	3	5	4	3	3	2	2	1			1	5	2	1	1	1	0	155.58	90	1
sp|P12081|SYHC_HUMAN	1	11	7	20	57.41	1			1	1			3	3	3	2	1	3	1							0	54.198	28	1
sp|P12109|CO6A1_HUMAN	1	8	8	8.9	108.53	2	1				1		1	5	2	2	2	2	2	2	1	1	1	1		0	78.934	46	1
sp|P12110|CO6A2_HUMAN	1	1	1	1.1	108.58																	1	1	1	1	0	4.8618	8	1
sp|P12111|CO6A3_HUMAN	1	2	2	1	343.67							2	1													0.0024876	2.2556	4	1
sp|P12236|ADT3_HUMAN;sp|P12235|ADT1_HUMAN	2	8;4	5;2	30.9	32.866	1	1		2	2	2	1	2		1	2	1	1	1							0	49.039	44	1
sp|P12268|IMDH2_HUMAN	1	10	10	26.3	55.804	4	4	1	1	1	2	2	6	1	2	2	3	4	3	3	1	2	2			0	108.54	96	1
sp|P12270|TPR_HUMAN	1	43	43	21.7	267.29	6	2	1	1	5	6	7	12	11	5	3	4	1	3	3	3	13	2	2	2	0	323.31	192	1
sp|P12277|KCRB_HUMAN	1	9	9	42	42.644	1	1		2	3	4	4	2	2	2	1	1	1								0	54.544	34	1
sp|P12429|ANXA3_HUMAN	1	7	7	28.2	36.375	2	1		1	5	6	3	4	1	1	1	1	1								0	53.609	38	1
sp|P12532|KCRU_HUMAN;sp|P17540|KCRS_HUMAN	2	7;1	7;1	28.5	47.036	2					1	2	2	3		2	2	2			1	2	2	1		0	66.799	63	1
sp|P12694|ODBA_HUMAN	1	5	5	8.8	50.47											1	1					1	1	1		0	19.029	13	1
sp|P12814|ACTN1_HUMAN;sp|P35609|ACTN2_HUMAN	2	33;7	22;2	50.9	103.06	2	2	1	2	6	13	15	13	5			1		1	5	2	2	1	2	2	0	323.31	151	1
sp|P12830|CADH1_HUMAN	1	5	5	9.1	97.455						2			2	1	2	2									0	31.557	12	1
sp|P12955|PEPD_HUMAN	1	6	6	13.4	54.548		1					1	2		2	1	1	2					1	1	1	0	65.12	31	1
sp|P12956|XRCC6_HUMAN	1	18	18	36.6	69.842	4	6		1	3	6	10	12	7	2	4	6	4	1		1	2	2	2	1	0	305.15	144	1
sp|P13010|XRCC5_HUMAN	1	19	19	36.1	82.704	5	3	1	2	4	4	7	6	3	2	5	5	1	3	2	2	3	4	4	2	0	220.77	211	1
sp|P13073|COX41_HUMAN	1	3	3	14.8	19.576			1	1	2		2	1					1	1							0	20.817	14	1
sp|P13284|GILT_HUMAN	1	1	1	10.4	27.963								1													0.0022659	2.3624	1	1
sp|P13473|LAMP2_HUMAN	1	3	3	9.3	44.96	1	1		1			1	2	1			1	1	1							0	11.563	18	1
sp|P13489|RINI_HUMAN	1	15	15	56	49.973	3	3	1	3	6	7	5	7	3	2	2	6	6	1		2	3	3	1	2	0	323.31	154	1
sp|P13639|EF2_HUMAN	1	26	26	32.9	95.337	2	2	1	2	6	9	13	11	6	1	4	6	3		2	3	3	2	3	1	0	323.31	235	1
sp|P13667|PDIA4_HUMAN	1	19	19	32.2	72.932	3	6	5	5	10	12	12	8	3	1	4	3	7	3							0	323.31	175	1
sp|P13674|P4HA1_HUMAN	1	7	7	13.7	61.049					1	1	1	2			1	3									0	15.773	13	1
sp|P13688|CEAM1_HUMAN	1	1	1	4	57.56																1	1				0.001311	2.8121	2	1
sp|P13693|TCTP_HUMAN	1	3	3	15.7	19.595				1	1	1	2	2													0	124.31	13	1
sp|P13726|TF_HUMAN	1	2	2	6.8	33.067						2	2														0	6.8423	3	1
sp|P13747|HLAE_HUMAN	1	4	2	14.5	40.156							1		1												0	3.7991	1	1
sp|P13760|2B14_HUMAN	1	1	1	4.1	30.112													1								0.0094275	1.4208	1	1
sp|P13797|PLST_HUMAN;sp|P13796|PLSL_HUMAN	2	10;2	7;1	23.7	70.81	1						1	5	1	2	1	2					1	3			0	53.546	26	1
sp|P13798|ACPH_HUMAN	1	11	11	28.3	81.224	1				1		2	2	3	1	4	4	3								0	56.433	28	1
sp|P13804|ETFA_HUMAN	1	9	9	39.6	35.079	3	2	2	2	4	6	6	7	8	2	2	3	1	2	1	1	3	1			0	149.31	132	1
sp|P13807|GYS1_HUMAN	1	6	6	9	83.785						1	1	2	3	1			1				1	1			0	16.734	15	1
sp|P13861|KAP2_HUMAN;sp|P31323|KAP3_HUMAN	2	10;1	10;1	27.7	45.518							1	4	4			1	5	3							0	45.29	29	1
sp|P13984|T2FB_HUMAN	1	1	1	8	28.38															2						0.0088208	1.5117	4	1
sp|P13995|MTDC_HUMAN	1	7	7	33.4	37.895	2	1	2	2	3	2	3	3	1	2	1	2						1			0	184.58	40	1
sp|P14061|DHB1_HUMAN	1	1	1	5.2	34.95														1							0.00053923	3.0555	2	1
sp|P14174|MIF_HUMAN	1	3	3	35.7	12.476								1				1	1	1			1		2	2	0	29.789	50	1
sp|P14314|GLU2B_HUMAN	1	12	12	29	59.425	1	1	1	2	6	4	8	5	2		2	3	1		1						0	323.31	69	1
sp|P14317|HCLS1_HUMAN	1	4	4	14.4	54.013									1	2				1	2						0	19.547	11	1
sp|P14324|FPPS_HUMAN	1	3	3	10	48.275							1	1					1			1					0	13.348	6	1
sp|P14373|TRI27_HUMAN	1	2	2	4.1	58.489						2					1										0.00053591	3.0008	3	1
sp|P14406|CX7A2_HUMAN	1	2	2	27.7	9.3959		1	1	1	1	1	1	2	1	1	1	1	1	1							0	50.522	31	1
sp|P14550|AK1A1_HUMAN	1	4	4	12	36.573									1								2	3	2	1	0	8.4993	12	1
sp|P14618|KPYM_HUMAN;sp|P30613|KPYR_HUMAN	2	22;1	22;1	47.3	57.936	9	9	9	11	14	18	19	14	6	3	1	2	3	1	2	3	4	7	5	3	0	323.31	451	1
sp|P14625|ENPL_HUMAN;sp|Q58FF3|ENPLL_HUMAN	2	27;1	25;1	36.2	92.468	9	11	8	10	11	12	15	8	12	1	2	5	2	8		3	3	1		1	0	323.31	447	1
sp|P14735|IDE_HUMAN	1	4	4	4.4	117.97							1				1							2	2		0	8.9286	15	1
sp|P14854|CX6B1_HUMAN	1	4	4	57	10.192					1			1	3					1	1						0	21.477	9	1
sp|P14859|PO2F1_HUMAN;sp|Q9UKI9|PO2F3_HUMAN;sp|P09086|PO2F2_HUMAN	3	5;3;3	5;3;3	11.3	76.471						1	1		1	1	1	2	1	1		1	2	1	1	1	0	27.89	18	1
sp|P14866|HNRPL_HUMAN	1	10	10	23.8	64.132	1					4	2	3	4	2	3	1	2	2				3	2	2	0	292.19	70	1
sp|P14868|SYDC_HUMAN	1	15	15	29.7	57.136	4	1		2	1	2	4	2	1			3	1	3	1	3	3	2	1	1	0	110.68	89	1
sp|P14923|PLAK_HUMAN	1	16	13	37.4	81.744		1			2	1	4	4	6	2	3	4	1				1	4	2	2	0	123.23	53	1
sp|P14927|QCR7_HUMAN	1	2	2	25.2	13.53		1	1	1	3	1	2	2													0	139.05	26	1
sp|P15121|ALDR_HUMAN	1	4	4	14.9	35.853							1			2				1							0	11.005	9	1
sp|P15151|PVR_HUMAN	1	1	1	2.9	45.302											1	3	3	1							0	7.6437	25	1
sp|P15153|RAC2_HUMAN	1	3	1	7.3	21.429																	2	2	2		0	9.9045	20	1
sp|P15170|ERF3A_HUMAN;sp|Q8IYD1|ERF3B_HUMAN	2	4;1	4;1	10.2	55.755								2				1			2						0	15.895	6	1
sp|P15291|B4GT1_HUMAN	1	1	1	7.3	43.92												1	1	1							0	28.872	4	1
sp|P15311|EZRI_HUMAN	1	16	9	28.3	69.412	3	6	3	3	7	10	17	13	5	2	3	4	3	2	2		2	3	2	1	0	323.31	218	1
sp|P15374|UCHL3_HUMAN	1	5	5	25.7	26.182									1		1	1					1			1	0	17.818	7	1
sp|P15407|FOSL1_HUMAN	1	1	1	11.4	29.413								1													0.0098039	1.3422	1	1
sp|P15529|MCP_HUMAN	1	1	1	3.8	43.747																	1	1	1	1	0	4.6067	13	1
sp|P15531|NDKA_HUMAN	1	6	3	42.1	17.149	2	2				1	3	2		1	2	1	2	3		2	4	4	4	3	0	46.675	225	1
sp|P15559|NQO1_HUMAN	1	3	3	9.5	30.867											1	1	2	2							0	20.688	11	1
sp|P15586|GNS_HUMAN	1	6	6	10.5	62.081	1	1			1	2	2	3	2	1	3	1	2	2		1	2	1			0	42.654	43	1
sp|P15735|PHKG2_HUMAN	1	2	2	5.9	46.442			1									1									0	4.1446	2	1
sp|P15880|RS2_HUMAN	1	7	7	23.2	31.324								2	2	2		3			2						0	49.297	31	1
sp|P15924|DESP_HUMAN	1	27	27	13.7	331.77	1	1			3		3	5	11	1	2	6	2	2	2						0	110.31	51	1
sp|P15927|RFA2_HUMAN	1	3	3	27	29.247						1	1				1	2	1	2	2						0	19.203	21	1
sp|P16070|CD44_HUMAN	1	5	5	7	81.537					2	2	2							1	2						0	89.332	23	1
sp|P16144|ITB4_HUMAN	1	28	28	19.1	202.16	2	2			2	5	11	10	2		7	4	7	5	1			3	2	2	0	276.22	105	1
sp|P16152|CBR1_HUMAN;sp|O75828|CBR3_HUMAN	2	11;2	11;2	61.4	30.375	1					1	2	4	1	2	5	5	3	3		1	2	4	3	3	0	115.14	72	1
sp|P16219|ACADS_HUMAN	1	3	3	15.5	44.297								2	1	1											0	6.0317	6	1
sp|P16220|CREB1_HUMAN	1	2	2	16.7	36.688							1		1	1											0	34.996	4	1
sp|P16278|BGAL_HUMAN;sp|Q6UWU2|GLB1L_HUMAN	2	10;1	10;1	20.5	76.074		1						3	4	1	3	4	1			1	2	2			0	47.671	42	1
sp|P16333|NCK1_HUMAN	1	4	4	17.2	42.864									1			2									0	3.1618	4	1
sp|P16401|H15_HUMAN	1	4	4	12.4	22.58	2	1	1	1	1	2	1					1									0	15.798	54	1
sp|P16403|H12_HUMAN	1	3	1	13.1	21.364	1																				0	5.1879	3	1
sp|P16422|EPCAM_HUMAN	1	4	4	13.1	34.932					1	1	1	1													0	63.339	11	1
sp|P16435|NCPR_HUMAN	1	12	12	23.3	76.689	1					1	2	4	4		1	5	3	1		1	1	1	2	1	0	69.567	65	1
sp|P16455|MGMT_HUMAN	1	1	1	8.7	21.646																		1			0	8.1176	1	1
sp|P16591|FER_HUMAN;sp|P07332|FES_HUMAN	2	1;1	1;1	1.3	94.637												1	1								0	3.2112	2	1
sp|P16615|AT2A2_HUMAN;sp|O14983|AT2A1_HUMAN;sp|Q93084|AT2A3_HUMAN	3	16;5;4	16;5;4	22.5	114.76	1				3	1	7	5	6		1	2	2	2		2			1		0	95.256	59	1
sp|P16949|STMN1_HUMAN;sp|Q93045|STMN2_HUMAN	2	4;1	4;1	24.2	17.302	1	2	1	1	1	1	1	2			2	4	2	1							0	24.627	44	1
sp|P16989|YBOX3_HUMAN	1	7	4	25	40.089	1	1			4	3	1	1		2	1										0	53.036	52	1
sp|P17050|NAGAB_HUMAN	1	2	2	7.1	46.564									1		1										0	4.1153	3	1
sp|P17066|HSP76_HUMAN;sp|P48741|HSP77_HUMAN	2	7;4	2;1	12.8	71.027							1	2													0	3.2023	9	1
sp|P17096|HMGA1_HUMAN	1	2	2	14	11.676	1																				0	18.33	13	1
sp|P17152|TMM11_HUMAN	1	1	1	8.3	21.541																		1	1		0	3.4541	2	1
sp|P17174|AATC_HUMAN	1	8	8	33.2	46.247	2					1	2	3	4	2	5	4		3	2						0	79.404	46	1
sp|P17252|KPCA_HUMAN;sp|P05771|KPCB_HUMAN;sp|P05129|KPCG_HUMAN	3	3;2;1	3;2;1	7.3	76.749									1			1	1				1				0	6.4308	5	1
sp|P17301|ITA2_HUMAN	1	18	18	20.4	129.29				1	2	5	3	2	3	1	2	4	5	1		2	2	3	3		0	196.45	68	1
sp|P17480|UBF1_HUMAN	1	4	4	5.8	89.405	1					1	2	2	1												0	11.535	9	1
sp|P17535|JUND_HUMAN	1	3	3	16.1	35.173												1			1		1	1			0	23.125	9	1
sp|P17544|ATF7_HUMAN	1	1	1	3	52.967							1	1													0	5.8072	4	1
sp|P17655|CAN2_HUMAN	1	8	8	17.6	79.994					1		1	4	1			1	1	1	1	1					0	124.5	19	1
sp|P17661|DESM_HUMAN	1	10	6	27.9	53.535							6	1	2		2	1			2		1	1	1	1	0	40.529	24	1
sp|P17693|HLAG_HUMAN	1	2	1	6.8	38.224				1	1	1															0	4.7525	5	1
sp|P17706|PTN2_HUMAN	1	2	2	8	48.473											1	1		2							0	7.8066	15	1
sp|P17812|PYRG1_HUMAN	1	8	8	18.1	66.69					1	2	2	1			2	1	2	1			1	1	2	2	0	38.222	27	1
sp|P17813|EGLN_HUMAN	1	4	4	9.3	70.577		1					1	5	5	1	1	1	1	1							0	47.486	28	1
sp|P17844|DDX5_HUMAN	1	18	13	37.3	69.147	5	5	2	3	6	8	4	10	10	3	5	5	6	6	2	5	4	4	2	1	0	323.31	234	1
sp|P17858|PFKAL_HUMAN	1	7	5	12.9	85.018							1				1	2	2	3							0	21.724	11	1
sp|P17931|LEG3_HUMAN	1	5	5	22	26.152	2	2		1	1	1	2	1	1	1	2	2	1			1	1	2	1		0	21.726	48	1
sp|P17980|PRS6A_HUMAN	1	13	13	38.3	49.203	1	1		1	2	5	8	7	5	1	3	2	2	2				1			0	148.51	92	1
sp|P17987|TCPA_HUMAN	1	21	21	46.4	60.343	3	4	1		2	7	6	8	7	3	4	5	3	1		2	4	3	4	2	0	318.87	154	1
sp|P18031|PTN1_HUMAN	1	11	11	37.9	49.966	1	1			1	1	2	8	3	2	3	3	1	2							0	93.952	52	1
sp|P18074|ERCC2_HUMAN	1	3	3	7.4	86.908								1						1	1						0	27.771	6	1
sp|P18084|ITB5_HUMAN	1	3	3	6.1	88.053						1	1					1		1			1				0	23.028	6	1
sp|P18085|ARF4_HUMAN	1	6	3	47.2	20.511		1	2	1	1	1	5	4	1	1	2	1	2								0	32.362	37	1
sp|P18124|RL7_HUMAN	1	6	6	17.7	29.225	3									1	2	2	2	3							0	32.561	23	1
sp|P18206|VINC_HUMAN	1	33	33	36.2	123.8	7	2		2	3	6	16	17	11	6	5	4	6	6	1		1	3	1	1	0	323.31	279	1
sp|P18433|PTPRA_HUMAN	1	3	3	5.5	90.599												2	1				1	1	1		0	9.2612	9	1
sp|P18583|SON_HUMAN	1	19	19	14	263.83	4	1		1	4	3	7	5	4	1	3	1	5	5					1		0	105.52	82	1
sp|P18615|NELFE_HUMAN	1	6	6	24.5	43.239						1	4	4								1	1	1	1	1	0	17.562	14	1
sp|P18621|RL17_HUMAN	1	2	2	9.8	21.397												1									0	4.4529	3	1
sp|P18669|PGAM1_HUMAN;sp|Q8N0Y7|PGAM4_HUMAN;sp|P15259|PGAM2_HUMAN	3	5;2;1	5;2;1	29.1	28.804					2	1	4	5	3	1		1	1								0	59.304	29	1
sp|P18754|RCC1_HUMAN	1	5	5	16.6	44.969							2	1	1		1	2						2	2		0	30.528	22	1
sp|P18858|DNLI1_HUMAN	1	3	3	3.6	101.73							1					2									0	6.8082	3	1
sp|P18859|ATP5J_HUMAN	1	3	3	44.4	12.587	1	2	1	1	2	3	3	4	1		1	1	1								0	190.05	35	1
sp|P18887|XRCC1_HUMAN	1	2	2	4.3	69.476														2	4						0	7.0455	7	1
sp|P19105|ML12A_HUMAN;sp|O14950|ML12B_HUMAN;sp|P24844|MYL9_HUMAN	3	7;7;4	7;7;4	51.5	19.794	1	2	3	2	4	7	7	7	4			1	1	1							0	323.31	107	1
sp|P19338|NUCL_HUMAN	1	15	15	22	76.613	2	3	3	5	5	6	9	9	4		1	2	1								0	317.24	129	1
sp|P19367|HXK1_HUMAN;sp|P52790|HXK3_HUMAN	2	16;2	12;0	19.1	102.48	2				1	2	3	2	2		2	3	1	3		1	2	2	2	1	0	93.218	54	1
sp|P19387|RPB3_HUMAN	1	5	5	32.7	31.441						1	3	3	2												0	14.813	11	1
sp|P19388|RPAB1_HUMAN	1	3	3	19	24.551						1	3	1										2	1	1	0	28.605	24	1
sp|P19404|NDUV2_HUMAN	1	8	8	41.8	27.391	1	1		1	5	4	3	1	1		2	1	2	3		1	1		1	1	0	50.539	43	1
sp|P19440|GGT1_HUMAN;sp|P36268|GGT2_HUMAN;sp|A6NGU5|GGT3_HUMAN;sp|Q14390|GGTL2_HUMAN;sp|B5MD39|GGTL3_HUMAN	5	6;5;4;1;1	6;5;4;1;1	17.6	61.409	1	1			2		4	2	2			2	1	1				1		1	0	22.587	27	1
sp|P19474|RO52_HUMAN	1	1	1	1.9	54.169													1								0.0010624	2.9309	1	1
sp|P19525|E2AK2_HUMAN	1	6	6	14.9	62.094								1	1	1			2	2							0	9.9551	7	1
sp|P19623|SPEE_HUMAN	1	3	3	15.6	33.824											1	1	2	1							0	13.222	8	1
sp|P19634|SL9A1_HUMAN	1	1	1	2	90.762																				1	0.0017935	2.6035	4	1
sp|P19784|CSK22_HUMAN	1	2	2	7.4	41.213										2		1									0	3.5569	3	1
sp|P19823|ITIH2_HUMAN	1	3	2	6.6	106.46							1	1	1		1	1	1		1	2	1		1	1	0	7.8764	30	1
sp|P19827|ITIH1_HUMAN;CON__Q0VCM5	2	4;1	4;1	7.2	101.39							1	1		1			1						1		0	12.608	6	1
sp|P19838|NFKB1_HUMAN	1	2	2	3	105.35									1	1				1							0	6.9017	3	1
sp|P19971|TYPH_HUMAN	1	4	4	12	49.955							1	1	1	1								1	1	1	0	6.8481	7	1
sp|P20020|AT2B1_HUMAN;sp|Q16720|AT2B3_HUMAN;sp|Q01814|AT2B2_HUMAN	3	10;3;2	5;0;0	10.7	138.75	1				2	3	2	2	4	1	1										0	63.834	26	1
sp|P20042|IF2B_HUMAN	1	6	6	20.7	38.388	2		1	2	3	4	3		1		2	1	1								0	93.892	41	1
sp|P20073|ANXA7_HUMAN	1	8	8	24.2	52.739	3	3	1	2	4	4	5	3	1	1		1	1			1				1	0	125.04	47	1
sp|P20138|CD33_HUMAN	1	1	1	3.6	39.825															1						0.0020269	2.4654	1	1
sp|P20290|BTF3_HUMAN	1	4	4	47.6	22.168	1								1			2	1		2	1					0	141.68	20	1
sp|P20336|RAB3A_HUMAN	1	1	1	6.8	24.984												1									0	4.6401	1	1
sp|P20337|RAB3B_HUMAN	1	1	1	7.3	24.758							1														0	4.6401	1	1
sp|P20338|RAB4A_HUMAN	1	1	1	6.4	24.389							1														0	3.6005	1	1
sp|P20339|RAB5A_HUMAN	1	5	3	34.4	23.658						1						1				1	1		1	1	0	6.679	6	1
sp|P20340|RAB6A_HUMAN;sp|Q9NRW1|RAB6B_HUMAN;sp|Q14964|RB39A_HUMAN	3	7;4;1	7;4;1	26.9	23.593	1		1	1	2	4	3	3	4		1	1	1	1		1	1	1			0	108.53	68	1
sp|P20591|MX1_HUMAN	1	7	4	17.8	75.519					1	1	2	1		1	2	1	1								0	48.075	10	1
sp|P20592|MX2_HUMAN	1	4	1	8.5	82.088									1	1											0.00053836	3.0297	2	1
sp|P20618|PSB1_HUMAN	1	6	6	27	26.489		1							1	1	4	3	2	6	2						0	106.76	45	1
sp|P20645|MPRD_HUMAN	1	1	1	5.1	30.993	1	1	1	1	1		1			2											0	55.237	13	1
sp|P20674|COX5A_HUMAN	1	3	3	16.7	16.762		1						1	3				2								0	10.542	8	1
sp|P20700|LMNB1_HUMAN	1	19	19	31.9	66.408	2	4		3	8	8	10	10	6	2	3	2	5	3							0	323.31	127	1
sp|P20810|ICAL_HUMAN	1	7	7	23	76.572					1	3	4			1	1	2	3	1							0	98.927	27	1
sp|P20839|IMDH1_HUMAN	1	2	2	7.2	55.405															1			1			0.007517	1.6138	3	1
sp|P20936|RASA1_HUMAN	1	5	5	5	116.4							1		1				1	1							0	5.9155	6	1
sp|P21266|GSTM3_HUMAN	1	1	1	5.3	26.559														1							0.0022756	2.4379	1	1
sp|P21281|VATB2_HUMAN;sp|P15313|VATB1_HUMAN	2	7;3	7;3	23.5	56.5	1						1	1	1				1	3	1		1	1			0	37.805	20	1
sp|P21283|VATC1_HUMAN;sp|Q8NEY4|VATC2_HUMAN	2	7;1	7;1	17.3	43.941								3			1	1	1				1				0	18.808	10	1
sp|P21291|CSRP1_HUMAN	1	5	5	41.5	20.567	1					1	1	2	1	3	1	2	1	1		1					0	33.824	23	1
sp|P21333|FLNA_HUMAN	1	81	76	46.1	280.74	22	21	16	23	25	29	49	39	26	15	12	12	9	10	6	7	12	12	12	5	0	323.31	1015	1
sp|P21399|ACOC_HUMAN	1	1	1	1.6	98.398																	1				0	3.1556	1	1
sp|P21589|5NTD_HUMAN	1	16	16	37.6	63.367	1	3			3	5	5	9	2		1	2	1	1	5	3	3	3	3	1	0	181.37	132	1
sp|P21675|TAF1_HUMAN	1	1	1	0.8	212.67															1						0.0022716	2.4102	2	1
sp|P21741|MK_HUMAN	1	1	1	7	15.585							1														0.0087719	1.4667	1	1
sp|P21796|VDAC1_HUMAN	1	17	17	71.7	30.772	3	5	6	7	7	9	9	8	6	3	5	5	3	3	1	2	4	4	2	4	0	323.31	296	1
sp|P21912|SDHB_HUMAN	1	7	7	28.2	31.629	1	2		1	2	1	3			1	4	2	2	2		1	6				0	77.92	45	1
sp|P21953|ODBB_HUMAN	1	3	3	10.5	43.122						1			1	1	2	2									0	13.519	10	1
sp|P21964|COMT_HUMAN	1	9	9	46.9	30.037		1			2	2	4	3	4		2	2	2	2	1						0	139.28	43	1
sp|P21980|TGM2_HUMAN	1	22	22	38.6	77.328	3	9	5	9	10	12	11	16	9	2	6	7	6	3	1						0	323.31	270	1
sp|P22033|MUTA_HUMAN	1	11	11	21.3	83.134						1	3	2	4	3		1	1			1					0	49.607	21	1
sp|P22059|OSBP1_HUMAN;sp|Q969R2|OSBP2_HUMAN	2	5;1	5;1	8.3	89.42					1						1	1	1	1			1	1	1		0	35.679	8	1
sp|P22061|PIMT_HUMAN	1	4	4	33.9	24.636									4		2	1	1	1							0	15.53	11	1
sp|P22087|FBRL_HUMAN	1	4	4	18.1	33.784						1		2	2	2							1		1		0	25.05	12	1
sp|P22102|PUR2_HUMAN	1	19	19	28.9	107.77	1				1	3	6	8	5	3	1	3	3	1	3		1				0	260.06	56	1
sp|P22234|PUR6_HUMAN	1	16	16	47.1	47.079	3	3	1	4	6	7	4	7	5	3	3	8	3	3			1	1	2	1	0	209.1	155	1
sp|P22307|NLTP_HUMAN	1	7	7	12.4	58.993						2	2					1					3	2	2	1	0	95.798	40	1
sp|P22314|UBA1_HUMAN	1	24	24	34.9	117.85	5	5		4	8	11	8	14	8	1	1	4	1	6		1	2	3	2	2	0	242.26	185	1
sp|P22392|NDKB_HUMAN;sp|O60361|NDK8_HUMAN	2	6;3	3;2	53.3	17.298											1	1	1				2	2	1	2	0	10.496	44	1
sp|P22413|ENPP1_HUMAN	1	3	3	6.8	104.92								3							1						0	9.1669	4	1
sp|P22570|ADRO_HUMAN	1	12	12	26.9	53.836	1							1	2		2	4	3	2			1	2	1	2	0	59.613	32	1
sp|P22626|ROA2_HUMAN	1	9	9	38.8	37.429				1	1		5	3	2	1	1		1	2	1	1					0	95.895	39	1
sp|P22670|RFX1_HUMAN	1	5	5	11.2	104.76									1	1				3	1						0	16.443	6	1
sp|P22676|CALB2_HUMAN;sp|P05937|CALB1_HUMAN	2	4;1	4;1	15.9	31.54	1	2					1	1		1	4	2	3	1							0	143.4	25	1
sp|P22681|CBL_HUMAN	1	4	4	6.6	99.632											2	1	1	2							0	8.4508	5	1
sp|P22694|KAPCB_HUMAN;sp|P17612|KAPCA_HUMAN;sp|P22612|KAPCG_HUMAN	3	2;2;1	2;2;1	8	40.622								1	3	1	1	1									0	14.352	11	1
sp|P22695|QCR2_HUMAN	1	12	12	41.3	48.442	1	2		2	2	4	5	5	4	4	7	7	3	4	2	2	1	1	1	1	0	323.31	147	1
sp|P22760|AAAD_HUMAN	1	1	1	2.5	45.733												1									0.0061641	1.7152	1	1
sp|P22830|HEMH_HUMAN	1	3	3	11.6	47.862									1					2		1	1				0	9.5601	6	1
sp|P23193|TCEA1_HUMAN	1	5	5	18.3	33.969					1			1			4	4									0	18.653	15	1
sp|P23229|ITA6_HUMAN	1	18	18	24.5	126.6	3	2			1	6	6	8	4		1	1	5	1		1	1			1	0	172.1	66	1
sp|P23246|SFPQ_HUMAN	1	8	8	13.9	76.149	1	4	2	2	3	4	4	6	6	1											0	157.48	90	1
sp|P23258|TBG1_HUMAN;sp|Q9NRH3|TBG2_HUMAN	2	3;1	3;1	12.4	51.169								2	1						1						0	13.82	6	1
sp|P23284|PPIB_HUMAN	1	10	10	44.9	23.742	6	7	4	5	11	4	5	7	6	4	3	2	5	1			1	2	1	1	0	323.31	211	1
sp|P23368|MAOM_HUMAN	1	8	8	22.1	65.443						1	1	2	1		2	1	2			1	3	2	1	1	0	30.182	34	1
sp|P23381|SYWC_HUMAN	1	11	11	42	53.165					2	4	6	4	1		1	3	3			1	2	1	1	1	0	177.92	86	1
sp|P23396|RS3_HUMAN	1	14	14	51.9	26.688	3	4	5	5	4	6	9	5	6	5	8	8	10	4	1						0	290.63	283	1
sp|P23434|GCSH_HUMAN	1	2	2	17.3	18.884						3	2	3	1												0	20.329	15	1
sp|P23470|PTPRG_HUMAN	1	4	4	3.7	162													1		2		1				0	4.2279	4	1
sp|P23497|SP100_HUMAN;sp|Q9H930|SP14L_HUMAN	2	2;1	2;1	3.2	100.42									2	2											0	12.154	4	1
sp|P23511|NFYA_HUMAN	1	1	1	5.5	36.876							1	2													0	12.064	3	1
sp|P23526|SAHH_HUMAN	1	12	12	21.1	47.716	2						1	1	1	1	1		1	2			1	2	2		0	79.329	58	1
sp|P23528|COF1_HUMAN	1	6	5	45.2	18.502	1	4	3	3	5	4	4	1	2	1	1	1	2		1			1			0	149.85	91	1
sp|P23588|IF4B_HUMAN	1	2	2	6.5	69.15								1	1				1	1							0	7.1583	7	1
sp|P23610|F8I2_HUMAN	1	2	2	10.8	39.103											1	1	1	2							0	23.217	5	1
sp|P23634|AT2B4_HUMAN	1	7	2	8.5	137.92								1							1						0	16.647	3	1
sp|P23786|CPT2_HUMAN	1	8	8	16.4	73.776							2		1			3		1		1	1	1			0	23.776	18	1
sp|P23919|KTHY_HUMAN	1	6	6	27.4	23.819		1					2	1	2	1	1		1			1					0	12.932	13	1
sp|P23921|RIR1_HUMAN	1	4	4	9.6	90.069					1			1				1			1						0	14.567	5	1
sp|P24385|CCND1_HUMAN	1	1	1	7.5	33.729													1								0	3.6693	1	1
sp|P24534|EF1B_HUMAN	1	5	5	38.7	24.763		2	2	2	1	1	2	5	4	1	1	1	1				1	1	1		0	161.44	60	1
sp|P24539|AT5F1_HUMAN	1	3	3	15.2	28.908	1											1			1						0	14.783	6	1
sp|P24666|PPAC_HUMAN	1	3	3	29.7	18.042		1			1		1	2	2												0	13.538	10	1
sp|P24752|THIL_HUMAN	1	13	13	42.6	45.199		1	1	1		3	3	7	2	1	4	1	5	1		4	4	6	6	5	0	293.02	233	1
sp|P24928|RPB1_HUMAN	1	6	6	4.7	217.17						1			2			1	2				2				0	9.7352	8	1
sp|P25205|MCM3_HUMAN	1	16	16	32.8	90.98	2	4	1	1	4	6	4	1	5	2	4	4	2	1	1	2		1	1		0	118.49	78	1
sp|P25325|THTM_HUMAN	1	4	4	26.9	33.178							1	1		1	3	3	2	3							0	64.981	33	1
sp|P25398|RS12_HUMAN	1	5	5	54.5	14.515		3	2	4	7	7	3			2	3	3	1	1							0	169.18	154	1
sp|P25440|BRD2_HUMAN	1	2	2	3.9	88.06									1							1	1				0	4.1121	2	1
sp|P25685|DNJB1_HUMAN	1	8	7	22.9	38.044	1	1			3	5	2	4	2		1	1	1								0	53.446	34	1
sp|P25705|ATPA_HUMAN	1	20	20	45.4	59.75	9	6	7	5	7	12	14	11	5	5	6	4	2	2				1		2	0	323.31	289	1
sp|P25774|CATS_HUMAN	1	1	1	4.8	37.495									1												0	3.3506	1	1
sp|P25786|PSA1_HUMAN	1	9	9	27.8	29.555					1	1	1			1	1	5		1			1	1	1	1	0	46.102	47	1
sp|P25787|PSA2_HUMAN	1	7	7	42.7	25.898				1	1	1	1	1	2		2	4	4	2		1	1	1	1		0	90.761	53	1
sp|P25788|PSA3_HUMAN	1	3	3	16.9	28.433		1	1		1	2							1	1			1	1	1		0	64.825	23	1
sp|P25789|PSA4_HUMAN	1	6	6	27.6	29.483				1	2	2	4	3	1								1	3	3	2	0	184.97	74	1
sp|P25942|TNR5_HUMAN	1	1	1	6.1	30.619																1	1				0	7.5932	2	1
sp|P26006|ITA3_HUMAN	1	7	7	5.8	116.61		2								1	4	3	3	1	1	5	1	1	1		0	96.498	47	1
sp|P26038|MOES_HUMAN	1	13	6	29.1	67.819					2	3	5	2	4	2	2	1	1								0	60.463	36	1
sp|P26196|DDX6_HUMAN	1	9	9	23.4	54.416						1		1	1	1	2	3	1			1	3	2			0	24.221	24	1
sp|P26232|CTNA2_HUMAN	1	6	1	7.9	105.31	1	1	1								2	2	1	2							0	77.626	15	1
sp|P26368|U2AF2_HUMAN	1	9	9	38.7	53.5	1	2	2	2	3	3	3	2	3	3	5	3	4	5	1						0	149.54	88	1
sp|P26373|RL13_HUMAN	1	4	4	10	24.261	1	1					1	1	1	1						1	1	1	3	1	0	73.341	40	1
sp|P26440|IVD_HUMAN	1	2	2	11.1	46.319								1									1	1	1		0	5.4454	5	1
sp|P26447|S10A4_HUMAN	1	2	2	18.8	11.728	1	1					1	1							2	4					0	6.4029	30	1
sp|P26599|PTBP1_HUMAN	1	14	13	44.1	57.221	1	3	1	3	2	7	4	6	5	4	7	7	4	11	3		1	3	2	1	0	323.31	295	1
sp|P26639|SYTC_HUMAN	1	11	11	19.2	83.434	1	2				1	2	2	2	2	8	7	6	4							0	42.317	58	1
sp|P26640|SYVC_HUMAN	1	15	15	16.9	140.47	1					1	3	1		4	3	5	1			1	1	2	1		0	70.827	32	1
sp|P26641|EF1G_HUMAN	1	11	11	24.9	50.118	2	3	2	2	4	5	5	7	3		1	4	2	1			2	3	1	1	0	190.13	114	1
sp|P26885|FKBP2_HUMAN	1	3	3	38	15.649		1	1		2	2	3	1	2	1											0	29.675	19	1
sp|P27105|STOM_HUMAN	1	5	5	28.1	31.73									1	1	1	2	3	2							0	30.728	9	1
sp|P27144|KAD4_HUMAN	1	2	2	9.9	25.268											1	1	2	2	1						0	5.796	12	1
sp|P27348|1433T_HUMAN	1	11	9	42	27.764		4	1	7	7	7	10	9	7	1	3	5	4	1			1	1			0	323.31	135	1
sp|P27449|VATL_HUMAN	1	1	1	11.6	15.736																1	1	1	1	1	0	9.8948	17	1
sp|P27540|ARNT_HUMAN	1	1	1	1.9	86.636												1									0.0052847	1.8595	0	1
sp|P27635|RL10_HUMAN	1	3	3	19.2	24.604							2	1	1												0	35.602	7	1
sp|P27694|RFA1_HUMAN	1	7	7	18	68.137						1	1	2	3			2	2				1	2	1		0	80.201	18	1
sp|P27695|APEX1_HUMAN	1	5	5	14.5	35.554								3	2	1	1		1								0	30.717	9	1
sp|P27701|CD82_HUMAN	1	2	2	10.5	29.625							1	1	1												0	6.8095	5	1
sp|P27708|PYR1_HUMAN	1	30	30	23.6	242.98	3	1		1	1	2	5	6	7	2	6	6	6	7	2	1	3	4	2	1	0	216.77	102	1
sp|P27797|CALR_HUMAN	1	13	13	40.5	48.141	1	1	1	1	5	8	11	10	3	2	2	1				1	1	1	1	1	0	323.31	126	1
sp|P27816|MAP4_HUMAN	1	29	29	39.2	121	4	10	2	3	7	13	17	12	5	9	2	1	2	1	2	3	3	2	3	3	0	296.29	305	1
sp|P27824|CALX_HUMAN	1	10	10	19.9	67.567	2	2	3	3	5	8	9	6	3	4	1	1				2	1	1	1	1	0	323.31	159	1
sp|P28062|PSB8_HUMAN	1	4	4	13.8	30.354								1	1						1			1			0	9.8643	5	1
sp|P28065|PSB9_HUMAN	1	3	3	15.5	23.264											2	1	1		1						0	6.4807	6	1
sp|P28066|PSA5_HUMAN	1	8	8	56	26.411		2	1	2	3	3		1	7	4	5	3	1		2				1		0	312.44	86	1
sp|P28070|PSB4_HUMAN	1	5	5	29.2	29.204								4	4							1	1		1	1	0	27.415	21	1
sp|P28072|PSB6_HUMAN	1	5	5	31.4	25.357	1	1		1		1	1	1	1	3	1										0	28.219	13	1
sp|P28074|PSB5_HUMAN	1	5	5	32.3	28.48		1				1	1	1					1		2	1	1	2	1		0	29.615	21	1
sp|P28290|SSFA2_HUMAN	1	12	12	14.9	138.38						2	4	3	3		1		4	2		3	2	1			0	38.66	35	1
sp|P28331|NDUS1_HUMAN	1	19	19	35.4	79.467	5	6	2	4	7	8	13	4	6	3	6	4	4	5	2	1					0	237.58	156	1
sp|P28340|DPOD1_HUMAN	1	5	5	5.5	123.63									1	1			1	1			1	1			0	8.0449	5	1
sp|P28347|TEAD1_HUMAN	1	2	2	7.5	47.945																		2	1		0	3.2596	6	1
sp|P28482|MK01_HUMAN	1	8	7	30.8	41.389							2	1	1	3	2	1	4								0	20.057	14	1
sp|P28676|GRAN_HUMAN	1	3	3	19.8	24.01						1			1			1							1	1	0	10.601	20	1
sp|P28799|GRN_HUMAN	1	5	5	11.3	63.544	1						1			1	2		2	2	1						0	36.462	18	1
sp|P28838|AMPL_HUMAN	1	13	13	34.1	56.166	1	2				1	4	2	2	1	4	4	5	4	2		1	1	2	1	0	95.729	75	1
sp|P29144|TPP2_HUMAN	1	13	13	16.2	138.35							2	2	3		1		1	2	3	1		1	1		0	75.333	23	1
sp|P29218|IMPA1_HUMAN	1	3	3	17.7	30.188							1	1	1												0	11.265	3	1
sp|P29279|CTGF_HUMAN	1	1	1	2.9	38.091														1							0.0038797	1.9903	1	1
sp|P29317|EPHA2_HUMAN;sp|P54764|EPHA4_HUMAN;sp|Q15375|EPHA7_HUMAN	3	18;1;1	17;0;0	23.7	108.27	3	5			2	5	1	4	3	2	1	3	1	1	1	1	3	2	3	1	0	69.85	87	1
sp|P29323|EPHB2_HUMAN;sp|P54762|EPHB1_HUMAN	2	10;2	9;1	13.2	117.49	1					3	5	1	1	1		1									0	20.777	12	1
sp|P29353|SHC1_HUMAN;sp|P98077|SHC2_HUMAN;sp|Q6S5L8|SHC4_HUMAN	3	9;1;1	9;1;1	23.7	62.821					1	1			1		1	2	1	3				1	1		0	26.842	17	1
sp|P29372|3MG_HUMAN	1	2	2	11.1	32.868						1		1	2												0	7.5393	5	1
sp|P29373|RABP2_HUMAN	1	5	5	28.3	15.693					1	1	1	1									1	1		1	0	14.319	10	1
sp|P29401|TKT_HUMAN	1	11	11	32.7	67.877	4	5	4	5	3	5	7	7	7	4	7	5	4	1			1				0	251.72	177	1
sp|P29558|RBMS1_HUMAN;sp|Q6XE24|RBMS3_HUMAN	2	2;1	2;1	7.4	44.505						1		1					1								0	6.0856	3	1
sp|P29590|PML_HUMAN	1	5	5	6.6	97.55							1					1	1	1	1	1	1	1			0	27.701	14	1
sp|P29692|EF1D_HUMAN	1	9	9	49.8	31.121	4	4	3	2	2	3	1	2	2	1	4	6	4	2	2	1	1		1	1	0	247.76	130	1
sp|P29966|MARCS_HUMAN	1	7	7	29.2	31.554	1	1	1	1	1	1	6	7													0	174.95	78	1
sp|P29992|GNA11_HUMAN;sp|O95837|GNA14_HUMAN	2	6;2	4;1	18.7	42.123	2							1		1	2	1	3		1						0	22.099	17	1
sp|P30038|AL4A1_HUMAN	1	1	1	2.8	61.719										1											0	3.5416	1	1
sp|P30040|ERP29_HUMAN	1	7	7	38.3	28.993		3	1	1	2	4	4	2	1	1	1	1	1	1	1	1	1	1	1	1	0	58.668	81	1
sp|P30041|PRDX6_HUMAN	1	10	10	56.7	25.035	3	3		1	3	4	6	3	3		1	1	2	1			1	1	1	1	0	64.248	63	1
sp|P30042|ES1_HUMAN	1	3	3	21.3	28.17	1								1			1						1	2		0	3.1141	6	1
sp|P30043|BLVRB_HUMAN	1	5	5	45.1	22.119								3	1	2	2	2	1								0	20.425	14	1
sp|P30044|PRDX5_HUMAN	1	9	9	55.1	22.086	6	4	4	5	5	4	8	3	6	2	7	8	2	2			2	1	9	2	0	147.73	252	1
sp|P30048|PRDX3_HUMAN	1	6	6	36.3	27.692	4	3	3	3	3	4	4	3	2	1	2	3	3	6							0	190.26	120	1
sp|P30050|RL12_HUMAN	1	6	6	45.5	17.818	3	1	2	3	3	3	3	3	1		3	2	1								0	288.94	80	1
sp|P30084|ECHM_HUMAN	1	10	10	45.2	31.387	5	2	1	3	4	7	7	10	3		2	2	2	2							0	229.48	127	1
sp|P30085|KCY_HUMAN	1	2	2	14.3	22.222											2	2									0	3.7963	8	1
sp|P30086|PEBP1_HUMAN	1	3	3	27.8	21.057						1		4													0	32.512	5	1
sp|P30101|PDIA3_HUMAN	1	16	16	35.8	56.782	1	5	5	6	8	8	12	7	4	3	2	5	1	1		3		1	1	1	0	323.31	204	1
sp|P30153|2AAA_HUMAN;sp|P30154|2AAB_HUMAN	2	16;4	16;4	31.9	65.308	2	1	1	1	1	5	6	7	6		3	2	5	3	1	3	4	3	3	1	0	309.23	156	1
sp|P30260|CDC27_HUMAN	1	3	3	5.1	91.866								1	1			1					1	1			0	5.6964	6	1
sp|P30405|PPIF_HUMAN	1	5	5	46.4	22.04	1	1			2	2	2	1	3					1	3		1	1	1	1	0	178.46	41	1
sp|P30419|NMT1_HUMAN	1	4	3	11.5	56.806							2	2	1	2	1	1	1	1	1						0	18.178	34	1
sp|P30455|1A36_HUMAN;sp|P30443|1A01_HUMAN;sp|P13746|1A11_HUMAN;sp|P04439|1A03_HUMAN;sp|P16188|1A30_HUMAN;sp|P30512|1A29_HUMAN;sp|P30459|1A74_HUMAN;sp|P10314|1A32_HUMAN	8	10;10;10;10;7;4;4;4	4;4;4;4;3;0;1;1	38.6	40.933	1	2	1	2	3	4	8	7	2	3	2	2	1				1				0	272.76	88	1
sp|P30480|1B42_HUMAN;sp|P30460|1B08_HUMAN;sp|P01889|1B07_HUMAN;sp|Q04826|1B40_HUMAN;sp|P30479|1B41_HUMAN;sp|Q95365|1B38_HUMAN;sp|Q29836|1B67_HUMAN;sp|Q29718|1B82_HUMAN;sp|P30475|1B39_HUMAN;sp|P30462|1B14_HUMAN;sp|P18463|1B37_HUMAN;sp|Q31610|1B81_HUMAN;sp|P30486|1B48_HUMAN	13	7;7;7;6;6;5;5;5;5;5;5;5;5	0;0;0;0;0;0;0;0;0;0;0;0;0	31.5	40.332	1				2	3	1	1	1		2	2	1								0	69.058	23	1
sp|P30481|1B44_HUMAN;sp|P30485|1B47_HUMAN;sp|P30461|1B13_HUMAN;sp|P03989|1B27_HUMAN;sp|P30483|1B45_HUMAN;sp|P30488|1B50_HUMAN;sp|P30487|1B49_HUMAN;sp|P30466|1B18_HUMAN	8	6;5;5;5;5;4;4;4	1;0;0;0;1;0;0;0	27.1	40.481						1	1	1	2												0.00053821	3.0297	7	1
sp|P30511|HLAF_HUMAN	1	1	1	6.9	39.061							1														0.0024869	2.2554	0	1
sp|P30519|HMOX2_HUMAN	1	5	5	20.6	36.032					1	1	2	4		1	1	1									0	50.856	15	1
sp|P30520|PURA2_HUMAN	1	6	6	15.4	50.097							2	2	1	1	1	2	1	1							0	18.714	15	1
sp|P30530|UFO_HUMAN	1	11	11	18.8	98.335						3	4	4	1	1	3	1	4	3		1	1	2	2	1	0	116	53	1
sp|P30533|AMRP_HUMAN	1	3	3	11.2	41.465							1	1													0	7.9652	5	1
sp|P30536|TSPOA_HUMAN	1	1	1	13.6	18.828																	1	1	1	1	0	22.741	16	1
sp|P30566|PUR8_HUMAN	1	1	1	2.3	54.889																	1	1	1		0.001799	2.6247	4	1
sp|P30622|CLIP1_HUMAN;sp|Q9UDT6|CLIP2_HUMAN	2	7;1	7;1	6.1	162.24						1		2	2	1		1	3	1							0	18.418	11	1
sp|P30626|SORCN_HUMAN	1	7	7	37.4	21.676					2	1	2	3				1	1		1	1	1	1	1		0	50.567	49	1
sp|P30740|ILEU_HUMAN	1	4	4	11.6	42.741							1	1			2	3	1								0	21.829	11	1
sp|P30837|AL1B1_HUMAN	1	13	13	27.3	57.206	2	1				1	1	2	3	3	2	5	2	3	3	1	5	4	2	1	0	143.92	109	1
sp|P30838|AL3A1_HUMAN	1	5	4	15.2	50.394						1			2					1	2						0	14.892	8	1
sp|P30876|RPB2_HUMAN	1	5	5	3.9	133.9							1			1					2		1				0	8.2978	5	1
sp|P31040|SDHA_HUMAN	1	13	13	30.3	72.691					1	2	1	3	1	5	2	2	5	6	1						0	157.14	78	1
sp|P31150|GDIA_HUMAN	1	11	7	35.1	50.582						2	2	4	4									1			0	70.827	16	1
sp|P31153|METK2_HUMAN;sp|Q00266|METK1_HUMAN	2	6;2	6;2	20.8	43.66	1	1			1	2	1		1		1	1	1	1	2	1			1	1	0	32.397	34	1
sp|P31327|CPSM_HUMAN	1	1	1	0.7	164.94													1								0.0038826	1.9979	1	1
sp|P31350|RIR2_HUMAN;sp|Q7LG56|RIR2B_HUMAN	2	6;1	6;1	23.4	44.877	1				1	2		3	1			1	3	4							0	32.257	22	1
sp|P31431|SDC4_HUMAN	1	1	1	7.1	21.641						1	1														0	3.1982	2	1
sp|P31641|SC6A6_HUMAN	1	2	2	3.2	69.829											1	1	1								0	4.0337	4	1
sp|P31689|DNJA1_HUMAN	1	6	6	27	44.868	1					1	1	1	2	3	1	1		1			1				0	31.599	27	1
sp|P31749|AKT1_HUMAN	1	1	1	3.3	55.686													1								0	4.5178	4	1
sp|P31930|QCR1_HUMAN	1	9	9	29.6	52.645		1		2	2	6	7	6	1	3	1	5		1							0	179.01	59	1
sp|P31937|3HIDH_HUMAN	1	8	8	32.1	35.329	1	1		1	2	2	2			1	2	4	3	2			3	2		1	0	100.12	49	1
sp|P31939|PUR9_HUMAN	1	24	24	50.3	64.615	2	1		1	2	6	11	8	3	3	2	1	5	2	2	3	4	4	2	2	0	290.54	140	1
sp|P31942|HNRH3_HUMAN	1	4	4	22	36.926	3	1	1		2	3	2	3	2				1								0	137.66	34	1
sp|P31943|HNRH1_HUMAN	1	12	8	32.3	49.229	2	5	6	5	10	12	13	8	6	1	4	3		1							0	323.31	170	1
sp|P31946|1433B_HUMAN	1	6	4	36.6	28.082		2	2	3	4	3	4	3	4		2	3	2								0	215.43	67	1
sp|P31947|1433S_HUMAN	1	8	6	33.5	27.774				1	1	2		2													0	48.052	26	1
sp|P31948|STIP1_HUMAN	1	15	15	25	62.639		2	1	2	6	9	5	3	2		1	2	1	1	2						0	259.22	89	1
sp|P31949|S10AB_HUMAN	1	2	2	25.7	11.74							1	1	2	1	1										0	18.886	24	1
sp|P32004|L1CAM_HUMAN	1	7	7	10.3	140	1					1	1	1	1				1				1	1	1	1	0	28.179	9	1
sp|P32119|PRDX2_HUMAN	1	6	5	18.7	21.892		1			1	1	1	2		1	2		2								0	24.651	19	1
sp|P32121|ARRB2_HUMAN	1	1	1	2.9	46.105													1								0.0041172	1.97	0	1
sp|P32322|P5CR1_HUMAN	1	7	6	23.8	33.36	1						1	2	1	2	1	2	2	1				1			0	98.959	38	1
sp|P32519|ELF1_HUMAN	1	6	6	17.1	67.497						1	1				1	1					4				0	12.84	13	1
sp|P32780|TF2H1_HUMAN	1	2	2	7.7	62.031							1	1													0	34.156	2	1
sp|P32929|CGL_HUMAN	1	4	4	15.3	44.508											1	2	1		2				1	1	0	7.719	13	1
sp|P32969|RL9_HUMAN	1	7	7	48.4	21.863	2	3	2	2	3	4	4	3	1			3	1								0	130.9	59	1
sp|P33176|KINH_HUMAN;sp|O60282|KIF5C_HUMAN;sp|Q12840|KIF5A_HUMAN	3	20;4;3	20;4;3	24.1	109.68	4	2			2	2	3	3	6	4	2	4	1	1							0	146.82	51	1
sp|P33240|CSTF2_HUMAN	1	7	4	23.9	60.959	1	1	1	2	2	2	2	2	1			1						1	1	1	0	40.001	25	1
sp|P33316|DUT_HUMAN	1	2	2	12.3	26.563		1			1	1	1			2		1									0	25.119	8	1
sp|P33527|MRP1_HUMAN	1	11	11	10.8	171.59							5	2	1	1				3			1				0	42.113	14	1
sp|P33908|MA1A1_HUMAN	1	2	2	6	72.968												1					1	1	1		0	6.0907	6	1
sp|P33991|MCM4_HUMAN	1	14	14	25.5	96.557	1	1	1	1	2	2	2	2	1	1	2	7	5	2	1				1		0	94.403	46	1
sp|P33992|MCM5_HUMAN	1	14	14	27.7	82.285		1			1	1	2	1	1	2	2	2	1	1	2	2		3	4	3	0	62.571	43	1
sp|P33993|MCM7_HUMAN	1	12	12	21.7	81.307	1					1	1	3	1	1	3	4	3		1	1	1	2	1	1	0	85.073	55	1
sp|P34059|GALNS_HUMAN	1	1	1	2.9	58.025														1							0.0027295	2.2287	1	1
sp|P34810|CD68_HUMAN	1	1	1	6.2	37.408															1						0	16.833	3	1
sp|P34896|GLYC_HUMAN	1	2	1	5.6	53.082														1							0	4.6181	1	1
sp|P34897|GLYM_HUMAN	1	16	15	34.5	55.992	1	2	2	2	1	6	6	4	4	1	5	6	4	5	2		1	1			0	264.17	88	1
sp|P34932|HSP74_HUMAN	1	27	25	48.7	94.33	3	4	3	3	10	9	15	16	3	3	6	7	6	3		1	2	2	2	2	0	323.31	258	1
sp|P34949|MPI_HUMAN	1	2	2	7.6	46.655									1						2						0	13.566	7	1
sp|P35052|GPC1_HUMAN	1	3	3	6.1	61.68							1					1									0	5.0704	3	1
sp|P35080|PROF2_HUMAN	1	4	4	40.7	15.046	1	1		1	2	1	1				2		2								0	40.105	16	1
sp|P35221|CTNA1_HUMAN;sp|Q9UI47|CTNA3_HUMAN	2	28;1	23;1	42.4	100.07	2	1		1	3	8	7	8	8	3	2	1	2	5		6	5	5	5	1	0	323.31	174	1
sp|P35222|CTNB1_HUMAN	1	15	12	30.9	85.496	1						2	1	1	2	1	3	2		4	2	1	2	2		0	52.323	43	1
sp|P35232|PHB_HUMAN	1	12	12	55.9	29.804	6	9	5	7	8	9	8	8	4	4	7	4	3	1	2	1		1			0	323.31	242	1
sp|P35237|SPB6_HUMAN	1	5	5	21.8	42.621	1	1					1	1	1	1	2	1					1	1	1	1	0	18.063	13	1
sp|P35241|RADI_HUMAN	1	13	6	24.2	68.563					1	2	3	3			1	2	1								0	26.077	21	1
sp|P35244|RFA3_HUMAN	1	2	2	24	13.569												1					1	2	1		0	17.753	16	1
sp|P35249|RFC4_HUMAN	1	6	6	22.9	39.681							1	2	3								1				0	82.433	12	1
sp|P35250|RFC2_HUMAN	1	7	7	24.6	39.157					1		1			2	1	1	1	1							0	42.893	11	1
sp|P35268|RL22_HUMAN	1	3	3	30.5	14.787	2	1					1				1	1	1		1	1	1				0	12.168	26	1
sp|P35269|T2FA_HUMAN	1	7	7	14.7	58.24							3	2	1	1		2									0	56.419	13	1
sp|P35270|SPRE_HUMAN	1	5	5	29.9	28.048		1				1		3	4	2	1	1	1				2	1		1	0	36.211	29	1
sp|P35520|CBS_HUMAN	1	11	11	27.9	60.586								1	1		4	5	2	2	1						0	41.238	20	1
sp|P35573|GDE_HUMAN	1	2	2	1.8	174.76										1					1						0.0036882	2.1207	2	1
sp|P35579|MYH9_HUMAN	1	73	63	38.5	226.53	23	15	14	19	36	39	45	55	29	9	11	9	7	5	5	3	3	6	6	3	0	323.31	760	1
sp|P35580|MYH10_HUMAN	1	36	24	21.2	229		1		1	2	5	9	9	5		2	5	4	1			1	1		1	0	271.65	68	1
sp|P35606|COPB2_HUMAN	1	16	16	23.1	102.49	1	2			2	3	4	9	4		3	5	1	1		1	1	1			0	177.06	71	1
sp|P35611|ADDA_HUMAN	1	4	4	8.7	80.954	1	1			1				2						1	2	2	1	2	1	0	19.855	42	1
sp|P35613|BASI_HUMAN	1	8	8	25.2	42.2	5	2	2	2	4	7	4	8	3	1											0	178.66	81	1
sp|P35637|FUS_HUMAN	1	5	3	9.7	53.425	1				1	1	1		1	1	3	2	1								0	34.823	37	1
sp|P35658|NU214_HUMAN	1	17	17	15.1	213.62							2	3	2		1	4	2	1	2	5	5	2	3		0	65.669	43	1
sp|P35659|DEK_HUMAN	1	4	4	12.8	42.674	1				1	2	3	1	1	1	1										0	27.582	10	1
sp|P35749|MYH11_HUMAN	1	12	4	6.2	227.34							1	2	1												0	4.6406	4	1
sp|P35754|GLRX1_HUMAN	1	1	1	19.8	11.776						1															0.0057184	1.7771	1	1
sp|P35813|PPM1A_HUMAN	1	2	2	8.1	42.447								1				1									0	4.638	2	1
sp|P35869|AHR_HUMAN	1	1	1	1.7	96.146													1								0	3.3073	1	1
sp|P35914|HMGCL_HUMAN	1	6	6	27.4	34.36								1	2	1	1	1	1	1		1	1	1	1		0	69.575	35	1
sp|P35998|PRS7_HUMAN	1	19	19	49	48.633	4	3		1	2	4	9	9	3	8	1	4	1				2	2	1	1	0	196.67	123	1
sp|P36404|ARL2_HUMAN	1	4	4	27.7	20.878	1				1		1				1		1								0	6.3088	5	1
sp|P36405|ARL3_HUMAN	1	1	1	5.5	20.455													1								0.0070805	1.6618	1	1
sp|P36507|MP2K2_HUMAN	1	5	3	18.2	44.424								3	2		1										0	28.795	11	1
sp|P36542|ATPG_HUMAN	1	4	4	11.7	32.996	1	2	1	1	1	1	1	1	1				1								0	28.731	37	1
sp|P36543|VATE1_HUMAN;sp|Q96A05|VATE2_HUMAN	2	3;1	3;1	13.3	26.145						1		2													0	7.5401	6	1
sp|P36551|HEM6_HUMAN	1	8	8	20.7	50.151	2	1				1	1	2		1	1			2		1	1	3	3	2	0	33.406	42	1
sp|P36578|RL4_HUMAN	1	7	7	22.5	47.697							1		2	1	1	1				2	1		1	1	0	20.989	23	1
sp|P36639|8ODP_HUMAN	1	1	1	7.6	22.519						1			1												0.0022573	2.3422	2	1
sp|P36776|LONM_HUMAN	1	24	24	31	106.49	2	3		1	1	4	9	7	6	1	3	7	5	3			2	7	1		0	271.5	122	1
sp|P36871|PGM1_HUMAN	1	8	8	19.2	61.448					1	2	3	2		2	2	1		2							0	49.473	18	1
sp|P36873|PP1G_HUMAN	1	10	1	36.5	36.983						1	2														0	92.067	4	1
sp|P36915|GNL1_HUMAN	1	3	3	5.9	68.66															1		2				0	5.8958	3	1
sp|P36957|ODO2_HUMAN	1	9	9	23	48.755	2	4	4	1	4	4	4	5	1		2	1	1	2		1	2	2		2	0	231.38	100	1
sp|P36969|GPX4_HUMAN	1	2	2	12.2	22.174											1	1						2	1	1	0	5.401	6	1
sp|P37108|SRP14_HUMAN	1	1	1	10.3	14.57		1			1	1			1												0	4.7275	5	1
sp|P37173|TGFR2_HUMAN	1	1	1	2.6	64.567										1											0.0041212	1.9794	1	1
sp|P37198|NUP62_HUMAN	1	8	8	22.6	53.254				1	1	3	4	3	2		1	2	1								0	67.332	35	1
sp|P37235|HPCL1_HUMAN;sp|P84074|HPCA_HUMAN;sp|P61601|NCALD_HUMAN	3	6;3;1	6;3;1	30.6	22.313	1		1	1	2	2	2	1	2				1								0	42.524	25	1
sp|P37802|TAGL2_HUMAN	1	9	9	44.7	22.391		1		2	3	8	6	4	6	4	1	1	1		1	5	4	2	1		0	240.55	170	1
sp|P37837|TALDO_HUMAN	1	5	5	7.1	37.54	1	1			2	2	2	3	1		1		1	2	1						0	39.383	36	1
sp|P38117|ETFB_HUMAN	1	13	13	56.1	27.843	5	3	2	2	3	5	6	6	5	4	1	3	3	2			3	2	1		0	264.79	147	1
sp|P38432|COIL_HUMAN	1	3	3	6.8	62.608								3			1	1									0	13.118	9	1
sp|P38435|VKGC_HUMAN	1	2	2	3.8	87.56											1		1	1							0	3.514	3	1
sp|P38571|LICH_HUMAN	1	2	2	9	45.418											1	1			1	1					0	9.5278	12	1
sp|P38606|VATA_HUMAN	1	7	7	20.6	68.303		1				1	1	2	2	1		1		1		1	2		1	1	0	80.222	29	1
sp|P38646|GRP75_HUMAN	1	25	25	39.9	73.68	15	17	19	14	19	20	25	25	22	10	4	8	7	1	1	3	4	9	3	2	0	323.31	560	1
sp|P38919|IF4A3_HUMAN	1	16	15	35	46.871	1		1		1	1	3	2	1	1	2	4	2		1						0	67.855	60	1
sp|P39019|RS19_HUMAN	1	4	4	22.8	16.06	1	1	1	1	2	3	2			1	1	2	2	1							0	15.374	42	1
sp|P39023|RL3_HUMAN	1	2	2	9.9	46.108							1	1				3									0	15.413	7	1
sp|P39656|OST48_HUMAN	1	8	8	23.5	50.8	3	2	1		2	2	2	2		1	1	2	1		1	2	2	1	2	2	0	61.368	88	1
sp|P39687|AN32A_HUMAN;sp|O95626|AN32D_HUMAN;sp|O43423|AN32C_HUMAN	3	6;2;2	4;2;2	16.5	28.585	1	1			1		1	1													0	18.902	10	1
sp|P39748|FEN1_HUMAN	1	8	8	28.4	42.592	1	1	1		1	1	1	4			1	1	1	1	3		1				0	104.36	39	1
sp|P40121|CAPG_HUMAN	1	6	6	29.3	38.498	1	1					1	2	1		3	3	2								0	104.61	23	1
sp|P40222|TXLNA_HUMAN	1	6	6	23.4	61.89	2	1				2	2	6	3												0	67.771	64	1
sp|P40227|TCPZ_HUMAN	1	12	9	30.7	58.024	6	4	2	3	3	5	5	7	3	2	3	4	1	5				1	1	1	0	192.29	116	1
sp|P40261|NNMT_HUMAN	1	2	2	20.8	29.574		1			1	2	2														0	43.73	10	1
sp|P40306|PSB10_HUMAN	1	1	1	6.2	28.936									2												0	6.8171	2	1
sp|P40425|PBX2_HUMAN;sp|P40424|PBX1_HUMAN	2	2;1	2;1	10.5	45.881									1							1					0	7.8081	2	1
sp|P40429|RL13A_HUMAN;sp|Q6NVV1|R13P3_HUMAN	2	2;1	2;1	11.3	23.577									1		1	1									0	20.046	6	1
sp|P40616|ARL1_HUMAN	1	2	2	18.8	20.417	1								1		1	1	1								0	10.692	7	1
sp|P40763|STAT3_HUMAN	1	10	10	18.4	88.067					1		3		5					3	3	1	2	2			0	93.198	59	1
sp|P40855|PEX19_HUMAN	1	5	5	28.8	32.806						1	4	1	1												0	17.538	7	1
sp|P40925|MDHC_HUMAN	1	5	5	23.1	36.426	2	1			2	1	2	1	1						1		1	2	2	2	0	90.932	99	1
sp|P40926|MDHM_HUMAN	1	14	14	47	35.503	3	3	7	6	8	7	10	14	9	3	7	5	5	2	3	2	4	5	3	4	0	323.31	390	1
sp|P40937|RFC5_HUMAN	1	6	6	20.3	38.496							1				1	1	1				2	2	2	1	0	25.288	21	1
sp|P40938|RFC3_HUMAN	1	3	3	11	40.556												1		1							0	15.989	5	1
sp|P40939|ECHA_HUMAN	1	26	26	48.5	82.999	3	2	1		6	7	10	4	6	2	5	10	4	4	3	2	2	4	1		0	323.31	177	1
sp|P41091|IF2G_HUMAN;sp|Q2VIR3|IF2GL_HUMAN	2	12;10	12;10	34.7	51.109	2				1	2	2	4	1	3	4	4	1	1				3	1	1	0	134.75	61	1
sp|P41134|ID1_HUMAN	1	1	1	6.5	16.132											1		1								0.00080192	2.9664	2	1
sp|P41214|EIF2D_HUMAN	1	2	2	5.7	64.706														2							0	20.753	2	1
sp|P41223|BUD31_HUMAN	1	1	1	13.2	17							1														0	3.9446	1	1
sp|P41227|NAA10_HUMAN	1	3	3	24.3	26.458							1	1	1	2											0	7.4414	5	1
sp|P41240|CSK_HUMAN	1	6	6	18.7	50.704							2	1	1		1	2		1							0	7.6952	7	1
sp|P41250|SYG_HUMAN	1	12	12	18.9	83.165	3	1			1	2	1	6	3		2	4	3			1	4	2	3	3	0	119.64	139	1
sp|P41252|SYIC_HUMAN	1	23	23	21.4	144.5	1	1			2	5	5	5	4	2	3	1	1		1		2	2	3	2	0	130.83	72	1
sp|P41567|EIF1_HUMAN;sp|O60739|EIF1B_HUMAN	2	2;2	2;2	35.4	12.732						1			1												0	8.4104	3	1
sp|P41743|KPCI_HUMAN	1	3	3	9.2	68.262						1	1		2												0	13.508	4	1
sp|P42025|ACTY_HUMAN	1	2	2	8.8	42.293									3	1											0	6.0466	4	1
sp|P42126|ECI1_HUMAN	1	2	2	9.3	32.816	2	2	1	1	3	2	4	2	2												0	62.382	32	1
sp|P42166|LAP2A_HUMAN	1	16	9	36.3	75.491	5	5	2	3	4	4	7	6	2	1	2	3	2	5	3	1	1	1	1		0	283.9	155	1
sp|P42167|LAP2B_HUMAN	1	14	7	34.6	50.67	1					1		3	2		1										0	49.356	17	1
sp|P42224|STAT1_HUMAN	1	15	15	27.1	87.334	2	2		1	1	1	5	3	4	1	2	8	4	3	1	1	1			1	0	179.23	64	1
sp|P42226|STAT6_HUMAN	1	6	6	11.1	94.134								1	1			2			1						0	14.243	9	1
sp|P42285|SK2L2_HUMAN	1	10	10	10.7	117.8	1						1	2	1	1	1	1	1		1						0	45.667	25	1
sp|P42330|AK1C3_HUMAN	1	1	1	6.2	36.853							1														0.0015492	2.6617	1	1
sp|P42345|MTOR_HUMAN	1	11	11	6.3	288.89							1	1	2		1	1	1	2			3	1	1	1	0	25.857	15	1
sp|P42356|PI4KA_HUMAN;sp|A4QPH2|PI4P2_HUMAN	2	4;1	4;1	3	231.32							1	1	1			1									0	3.2939	4	1
sp|P42566|EPS15_HUMAN	1	10	10	14.7	98.655					1	2	3	7		1	1	1		1							0	41.725	22	1
sp|P42574|CASP3_HUMAN	1	1	1	6.9	31.608									1												0.00053952	3.0561	1	1
sp|P42677|RS27_HUMAN;sp|Q71UM5|RS27L_HUMAN	2	2;1	2;1	15.5	9.461										1	1	2	1	2							0	6.9956	16	1
sp|P42704|LPPRC_HUMAN	1	52	52	44.8	157.9	10	11	9	10	15	21	28	31	18	4	13	6	8	5	6	7	7	6	6	6	0	323.31	596	1
sp|P42765|THIM_HUMAN	1	10	10	50.9	41.924	1	1		1	2	3	2	2		1		3	1	1				1			0	99.551	26	1
sp|P42766|RL35_HUMAN	1	1	1	10.6	14.551									1												0.0094253	1.4172	1	1
sp|P42785|PCP_HUMAN	1	2	2	2.4	55.799											2	1									0	3.4231	7	1
sp|P42858|HD_HUMAN	1	2	2	1.1	347.6								1							1						0.0079384	1.5619	2	1
sp|P42892|ECE1_HUMAN	1	9	9	17	87.163	1						1	4	2		3	3	2	1	1						0	64.374	82	1
sp|P43003|EAA1_HUMAN	1	1	1	2.2	59.572								1													0.00155	2.6768	1	1
sp|P43007|SATT_HUMAN	1	3	3	12.4	55.722					1	1	1	2	2												0	40.944	9	1
sp|P43034|LIS1_HUMAN	1	2	2	8.8	46.637										1	3	3	1								0	23.231	15	1
sp|P43121|MUC18_HUMAN	1	14	14	29.4	71.607	2				1	2	4	4	7	3				2		1					0	166.83	46	1
sp|P43155|CACP_HUMAN	1	3	3	6.2	70.857								1				1			1						0	26.291	7	1
sp|P43243|MATR3_HUMAN	1	15	15	26.4	94.622	3	3		4	3	4	8	14	9	5	6	12	6	5	5	2					0	323.31	280	1
sp|P43246|MSH2_HUMAN	1	10	10	13.8	104.74								2	2		2	4	1	1							0	56.943	15	1
sp|P43304|GPDM_HUMAN	1	15	15	25.9	80.852	1	1			1	1	4	3	3	1	2	1	4	1			1	1	1		0	67.083	37	1
sp|P43307|SSRA_HUMAN	1	3	3	17.1	32.235	1				2	3	3	1													0	24	17	1
sp|P43487|RANG_HUMAN	1	3	3	21.4	23.31	1	1				1									1						0	18.198	5	1
sp|P43490|NAMPT_HUMAN	1	10	10	32.6	55.52					1	2	5			2	4	3	2	2	2	1	1	1			0	136	54	1
sp|P43686|PRS6B_HUMAN	1	12	12	38.8	47.366	1	2		1	2	7	8	14	3	1	1	2	1	1			1	1	1	1	0	235.53	125	1
sp|P43897|EFTS_HUMAN	1	6	6	33.8	35.39								3	4				1	1				1			0	47.625	16	1
sp|P45877|PPIC_HUMAN	1	1	1	6.1	22.763									1												0	3.1926	2	1
sp|P45880|VDAC2_HUMAN	1	11	11	59.9	31.566	3	6	4	5	6	6	7	6	5	5	2	2	3	3		1	1		1	3	0	323.31	209	1
sp|P45954|ACDSB_HUMAN	1	4	4	12.7	47.485								1	1			1	1	2							0	29.966	12	1
sp|P45973|CBX5_HUMAN	1	3	3	22	22.225						1		2													0	10.916	5	1
sp|P45974|UBP5_HUMAN	1	9	9	19.7	95.785	2	2		1	2	3	5	6	5												0	85.9	57	1
sp|P45984|MK09_HUMAN;sp|P45983|MK08_HUMAN;sp|P53779|MK10_HUMAN	3	1;1;1	1;1;1	2.6	48.139														1							0.0013034	2.7478	1	1
sp|P45985|MP2K4_HUMAN	1	4	4	13.3	44.287								1					1	1	1			1			0	8.6239	6	1
sp|P46060|RAGP1_HUMAN	1	16	16	28.6	63.541	2	1	1	2		4	5	8	5	1							1	2	1	1	0	111.04	58	1
sp|P46063|RECQ1_HUMAN	1	5	5	11.6	73.457											1	1	2	2		1	2	1	1	1	0	13.344	21	1
sp|P46087|NOP2_HUMAN	1	6	6	7.6	89.301									1		2		3	1	2						0	16.339	11	1
sp|P46108|CRK_HUMAN	1	5	5	27	33.83					3	2	1		1				1	1						1	0	15.398	13	1
sp|P46109|CRKL_HUMAN	1	10	10	44.2	33.777		1		1	4	2	4	1	4	1	2	2	1				1	2	1		0	146.97	34	1
sp|P46199|IF2M_HUMAN	1	4	4	7	81.316					2	1							1				1	1	1	1	0	9.41	13	1
sp|P46379|BAG6_HUMAN	1	11	11	14	119.41	3	2		1	1	1	2	2	2	3	2	4	3	2			2	1	1		0	55.9	44	1
sp|P46459|NSF_HUMAN	1	13	13	20.2	82.593	1				2	3	3	5	4	1	1	1	1	2		1	1	2	2	1	0	68.269	47	1
sp|P46734|MP2K3_HUMAN;sp|P52564|MP2K6_HUMAN	2	3;1	3;1	12.7	39.318								4													0	4.8408	4	1
sp|P46736|BRCC3_HUMAN	1	1	1	4.1	36.072																	1	1	1		0	3.1997	3	1
sp|P46776|RL27A_HUMAN	1	3	3	14.2	16.561	1	1	1	1		1					2	2	1	1							0	52.463	24	1
sp|P46777|RL5_HUMAN	1	8	8	35.7	34.362							1		2	2			2	1			2	2			0	44.247	23	1
sp|P46778|RL21_HUMAN	1	3	3	27.5	18.565								2									1	2			0	12.585	8	1
sp|P46779|RL28_HUMAN	1	1	1	7.3	15.747															1	1					0	8.0228	2	1
sp|P46781|RS9_HUMAN	1	4	4	14.4	22.591	2	2	1				1			2	2	2	2	2		1	2	2	4	2	0	89.504	63	1
sp|P46782|RS5_HUMAN	1	5	5	32.4	22.876			1	6	4	10	5	1	2							1	2	2	1	2	0	243.78	99	1
sp|P46783|RS10_HUMAN;sp|Q9NQ39|RS10L_HUMAN	2	4;2	4;2	23	18.898	1						1				1	2									0	20.427	8	1
sp|P46926|GNPI1_HUMAN;sp|Q8TDQ7|GNPI2_HUMAN	2	6;3	6;3	28	32.668					1		1	3	1	1	2	3	2	2	1	1	1	1			0	32.356	28	1
sp|P46934|NEDD4_HUMAN	1	4	4	5.8	149.11					1	1	1	1		1								1			0	24.633	8	1
sp|P46937|YAP1_HUMAN	1	5	5	17.9	54.461						4	2	1													0	24.632	14	1
sp|P46939|UTRO_HUMAN	1	28	28	12.3	394.46						1	11	12	6		1	2	2	2	4	1		1		1	0	164.24	60	1
sp|P46940|IQGA1_HUMAN;sp|Q13576|IQGA2_HUMAN	2	35;1	34;0	30.3	189.25	2	4			4	6	14	23	11	3	1	2	2	1	1	1	3	3	3	3	0	323.31	154	1
sp|P46976|GLYG_HUMAN	1	2	2	8.6	39.383						1	1			1	1	1	1	1							0	21.462	12	1
sp|P46977|STT3A_HUMAN	1	4	4	6.1	80.529					2	2		2	1			1	1	1							0	10.98	11	1
sp|P47224|MSS4_HUMAN	1	1	1	8.9	13.839																	1	1	1		0.0098218	1.3604	3	1
sp|P47755|CAZA2_HUMAN	1	12	10	61.2	32.949	3	2	1	1	4	5	4	2	1	2	2	2	2	2	1	1	2	2	1	1	0	120.86	71	1
sp|P47756|CAPZB_HUMAN	1	10	10	28.9	31.35		1		2	2	3	4	1	2	3	1	1	1								0	114.25	29	1
sp|P47813|IF1AX_HUMAN;sp|O14602|IF1AY_HUMAN	2	2;2	2;2	31.9	16.46								1						1							0	18.148	13	1
sp|P47895|AL1A3_HUMAN;sp|O94788|AL1A2_HUMAN	2	16;1	16;1	39.8	56.108	1	2	1		2	2	4	2	4	4	1	2	1	5	7		1				0	86.784	78	1
sp|P47897|SYQ_HUMAN	1	17	17	29.8	87.798	1	1		1	2	3	1	3	1		1	4			1	1	4	6	4	1	0	156.46	82	1
sp|P47985|UCRI_HUMAN;sp|P0C7P4|UCRIL_HUMAN	2	6;3	6;3	35.8	29.668	1	1	1	1	2	3	4	2	2	2	3	3					1	1	1	1	0	115.78	124	1
sp|P47989|XDH_HUMAN	1	1	1	1.1	146.42																	1				0.0052783	1.8492	1	1
sp|P48047|ATPO_HUMAN	1	7	7	49.3	23.277	1				1	1	3	1	2		2	3	3			1	4	4	3	1	0	87.55	104	1
sp|P48059|LIMS1_HUMAN;sp|Q7Z4I7|LIMS2_HUMAN	2	3;1	3;1	11.7	37.251	1								1				1					1			0	7.759	6	1
sp|P48147|PPCE_HUMAN	1	4	4	9.4	80.699		1			1	1	3	1						1							0	15.763	11	1
sp|P48163|MAOX_HUMAN	1	4	4	10.7	64.149					1		2	1						1				1			0	7.0953	7	1
sp|P48382|RFX5_HUMAN	1	1	1	2.3	65.322												1									0.0098106	1.3465	1	1
sp|P48426|PI42A_HUMAN	1	1	1	3.4	46.224							1														0	5.6686	1	1
sp|P48436|SOX9_HUMAN	1	1	1	2.4	56.136														1							0.0017953	2.608	1	1
sp|P48444|COPD_HUMAN	1	5	5	11.4	57.21	1	1				1	2	1	1	1	4	2	2								0	79.457	25	1
sp|P48449|ERG7_HUMAN	1	2	2	4	83.308						1										1	1				0	5.2174	4	1
sp|P48506|GSH1_HUMAN	1	2	2	4.9	72.765														1				1	1		0.0036532	2.0314	4	1
sp|P48553|TPC10_HUMAN	1	4	4	5.2	142.19										2			1	2							0	8.7602	4	1
sp|P48556|PSMD8_HUMAN	1	4	4	6.9	39.611											2							1		1	0	28.738	20	1
sp|P48634|PRC2A_HUMAN	1	13	12	8.9	228.86						1	2	1	2		2	1		1	1		2	5	3	2	0	54.236	85	1
sp|P48637|GSHB_HUMAN	1	7	7	20.7	52.384					1		1	2		1	2		2								0	26.905	9	1
sp|P48643|TCPE_HUMAN	1	19	19	50.8	59.67	3	2	1	1	3	1	6	11	7	3	5	6	3	6	4	2	2	3	3	1	0	228.23	229	1
sp|P48681|NEST_HUMAN	1	33	33	27.7	177.44	4	4		3	5	9	14	10	7	5	4	4	2	2		1	3	1	1	2	0	249.18	108	1
sp|P48723|HSP13_HUMAN	1	9	9	26.1	51.927						3	2	3				1			2	2	2	2	1	1	0	32.091	39	1
sp|P48729|KC1A_HUMAN	1	1	1	2.7	38.914																	1				0.0090007	1.4625	2	1
sp|P48735|IDHP_HUMAN	1	12	11	24.8	50.909	1	1		1	2	6	4	5	2	1	1	1	1	1	3	1		2	1	1	0	123.46	64	1
sp|P48739|PIPNB_HUMAN	1	3	3	23.2	31.54						1		2	2												0	15.132	7	1
sp|P48960|CD97_HUMAN;sp|Q9UHX3|AGRE2_HUMAN	2	8;1	8;1	15.1	91.868	1	1		1	2	5	4	2	1	2	3	2	3		1						0	161.49	45	1
sp|P49005|DPOD2_HUMAN	1	6	6	20	51.289		1									2	2					1	2	2	2	0	20.883	15	1
sp|P49006|MRP_HUMAN	1	3	3	54.4	19.529	1			1	3	4	3	1													0	102.07	31	1
sp|P49023|PAXI_HUMAN	1	5	5	11	64.505						1		2			1	2	1								0	40.864	14	1
sp|P49116|NR2C2_HUMAN	1	3	3	7.4	65.414												1	2								0	9.5184	3	1
sp|P49137|MAPK2_HUMAN	1	1	1	3.2	45.567																		1			0.00249	2.2665	1	1
sp|P49189|AL9A1_HUMAN	1	10	10	28.3	53.801						1		3	4		2	1	1	2	1	3	2	4	1		0	35.571	27	1
sp|P49247|RPIA_HUMAN	1	5	5	26	33.269								2	3		2	1	1	2		1	1	1			0	38.592	22	1
sp|P49257|LMAN1_HUMAN	1	4	4	16.7	57.548														5							0	12.073	11	1
sp|P49321|NASP_HUMAN	1	10	10	24.9	85.237	1				1	1	4	3		1	1	1		1	3						0	151.81	40	1
sp|P49327|FAS_HUMAN	1	39	39	23.4	273.42	7	6			6	11	10	9	10	6	10	12	9	6	6	1	4	4	4	2	0	323.31	198	1
sp|P49366|DHYS_HUMAN	1	3	3	14.4	40.97													1	1				1			0	4.8098	3	1
sp|P49368|TCPG_HUMAN	1	16	16	38.3	60.533	2	1	1	2	2	4	8	10	11	2	2	6	4	2	3						0	152.24	110	1
sp|P49406|RM19_HUMAN	1	6	6	25.7	33.535	1	1			1	1	1	3		1	1	1	1		1				1	1	0	32.444	23	1
sp|P49411|EFTU_HUMAN	1	14	14	46.2	49.541	1	5	1	2	4	5	9	10	14				1	3	8	2					0	323.31	139	1
sp|P49419|AL7A1_HUMAN	1	14	14	29.9	58.486	1					1	2	3	4		2	5	3		1		2	3	3	2	0	113.62	85	1
sp|P49458|SRP09_HUMAN	1	3	3	34.9	10.112						1	1	1	2	1									1		0	9.1718	9	1
sp|P49585|PCY1A_HUMAN;sp|Q9Y5K3|PCY1B_HUMAN	2	3;1	3;1	7.4	41.731								1			1	1									0	7.6477	4	1
sp|P49588|SYAC_HUMAN	1	18	18	28.2	106.81	2	2	1	2	3	8	10	11	7	1	2	2									0	309.14	100	1
sp|P49589|SYCC_HUMAN	1	13	13	24.2	85.472	4	3	1	1	2	7	5	6	4		1	2	1				1	3	2		0	95.281	65	1
sp|P49590|SYHM_HUMAN	1	6	2	11.9	56.888							1						1								0.0070738	1.6468	1	1
sp|P49591|SYSC_HUMAN	1	10	10	24.7	58.777	1	1			1	2	6	3	4	2	1			1	3						0	118.35	38	1
sp|P49643|PRI2_HUMAN	1	2	2	6.3	58.805						1									1						0.0088269	1.5129	2	1
sp|P49711|CTCF_HUMAN	1	2	2	1.8	82.785												1									0	16.176	3	1
sp|P49720|PSB3_HUMAN	1	5	5	30.2	22.949				1	1	1			1	1	1	1	2	1							0	47.957	17	1
sp|P49721|PSB2_HUMAN	1	4	4	13.9	22.836		1							1	1	3	2									0	56.374	16	1
sp|P49736|MCM2_HUMAN	1	20	20	31.2	101.89		2		3	3	4	6	1	2	1	4	8	4	2	1	3	2	4	4	3	0	271.4	110	1
sp|P49748|ACADV_HUMAN	1	21	21	43.2	70.389	6	5	3	3	2	5	8	9	13	3	2	3	3	2	3	2	3	2	1	2	0	323.31	139	1
sp|P49750|YLPM1_HUMAN	1	11	11	9.7	219.98									4			1	1				2	1	1	1	0	22.869	22	1
sp|P49754|VPS41_HUMAN	1	4	4	6.1	98.565								1			2	2	2								0	6.0942	7	1
sp|P49755|TMEDA_HUMAN	1	5	5	31.5	24.976	1	1		1	2	4	6	2					1		1						0	79.856	31	1
sp|P49756|RBM25_HUMAN	1	6	6	7	100.18	1	1			1	1	1	2	2							1	2	1	1		0	29.217	56	1
sp|P49757|NUMB_HUMAN	1	3	2	7.5	70.803							1		1												0	10.778	1	1
sp|P49768|PSN1_HUMAN	1	2	2	8.1	52.667							1						2	1							0	12.516	5	1
sp|P49770|EI2BB_HUMAN	1	3	3	13.7	38.989					1		2	1	1	1			1								0	7.7897	11	1
sp|P49773|HINT1_HUMAN	1	1	1	15.9	13.802														1	1						0	9.4512	3	1
sp|P49792|RBP2_HUMAN;sp|P0DJD0|RGPD1_HUMAN;sp|P0DJD1|RGPD2_HUMAN	3	32;6;6	25;0;0	15.4	358.2	1				1	3	2	5	5	2	5	5	4	3	4	2	3	1	1	1	0	220.45	75	1
sp|P49821|NDUV1_HUMAN	1	8	8	27.2	50.817						3	2	2	4	1	1	3	1	3			1	1			0	65.551	29	1
sp|P49840|GSK3A_HUMAN	1	2	2	6.4	50.98									1				1								0	3.7333	1	1
sp|P49841|GSK3B_HUMAN	1	4	4	14	46.744									1							1		1			0	7.4789	5	1
sp|P49848|TAF6_HUMAN	1	4	4	9.2	72.668							1				1	1		1			1	1	1		0	8.0539	11	1
sp|P49902|5NTC_HUMAN	1	4	4	10.3	64.969	1						1				2	1		1					2	2	0	29.286	20	1
sp|P49903|SPS1_HUMAN	1	6	6	23.5	42.91		1			1	1		1			1		1	2			1	5	1	1	0	55.057	19	1
sp|P49915|GUAA_HUMAN	1	14	14	30.3	76.715		2			1	2	5	5	1	2	3	4			1			2	2	1	0	114.68	60	1
sp|P49916|DNLI3_HUMAN	1	4	4	5.3	112.91								1			1	1	1								0	10.155	4	1
sp|P49959|MRE11_HUMAN	1	5	5	8.3	80.592				1	1	1		1		1	1		2	1							0	42.66	10	1
sp|P50148|GNAQ_HUMAN	1	3	1	10.9	42.142									1												0	12.117	1	1
sp|P50151|GBG10_HUMAN	1	3	3	52.9	7.2053	1											1	4	1							0	22.147	9	1
sp|P50213|IDH3A_HUMAN	1	6	6	13.7	39.591		1			1	1		1		2	1	2	2			1	1	1		1	0	52.608	33	1
sp|P50225|ST1A1_HUMAN;sp|P50226|ST1A2_HUMAN	2	6;3	5;3	30.8	34.165		1					2	1	1	2		1	2	3							0	21.647	25	1
sp|P50281|MMP14_HUMAN	1	1	1	1.7	65.893									1												0.0036774	2.0895	1	1
sp|P50336|PPOX_HUMAN	1	3	3	13.8	50.765								2				1									0.0013017	2.7411	2	1
sp|P50395|GDIB_HUMAN	1	17	13	48.1	50.663					3	3	6	8	3	3	4	12	2	1			3	1	3		0	197.14	139	1
sp|P50402|EMD_HUMAN	1	5	5	39	28.994		1		2	3	4	1				3		3	2				1			0	40.078	44	1
sp|P50416|CPT1A_HUMAN	1	3	3	3.5	88.367													1	1							0	6.9358	3	1
sp|P50440|GATM_HUMAN	1	2	2	6.9	48.455									1					1							0.0089965	1.4541	2	1
sp|P50443|S26A2_HUMAN	1	1	1	1.4	81.661																	1	1			0.0020294	2.4732	2	1
sp|P50453|SPB9_HUMAN	1	8	8	30.3	42.403	2					2	3		1	2	1	1	2	3							0	33.912	21	1
sp|P50454|SERPH_HUMAN	1	15	15	37.1	46.44	6	4	2	3	4	4	11	9	9	1	3	1	4		7	4	3	1			0	323.31	289	1
sp|P50479|PDLI4_HUMAN	1	5	5	21.2	35.398						1			3			2	2								0	16.775	8	1
sp|P50502|F10A1_HUMAN;sp|Q8NFI4|F10A5_HUMAN;sp|Q8IZP2|ST134_HUMAN	3	6;5;4	6;5;4	13.3	41.331	2	3		1	2	3	1	4	3												0	65.307	38	1
sp|P50542|PEX5_HUMAN	1	4	4	10.8	70.864								1	1	2		2		1							0	20.567	8	1
sp|P50552|VASP_HUMAN	1	4	4	17.4	39.829					1		1	1	2	1	2	2	2					1	1	1	0	58.808	20	1
sp|P50570|DYN2_HUMAN	1	13	10	23.9	98.063	1	1			1	5	5	2	4		2	4					1				0	96.086	33	1
sp|P50613|CDK7_HUMAN	1	1	1	4.3	39.038							1	1													0.002971	2.2044	2	1
sp|P50748|KNTC1_HUMAN	1	3	3	1.5	250.75									1		2	1									0	4.9171	5	1
sp|P50750|CDK9_HUMAN	1	2	2	5.4	42.777	1	1											2	1							0	3.335	7	1
sp|P50851|LRBA_HUMAN	1	19	19	9.8	319.1	1					1		3	2	2	4	3	4	3	3		3	1		2	0	85.38	53	1
sp|P50895|BCAM_HUMAN	1	13	13	33.3	67.404	1	1			3	2	4	6	1	3	1	1	6	2		1	1		1	1	0	173.68	68	1
sp|P50897|PPT1_HUMAN	1	5	5	31.7	34.193		2		2	1	2	1	2		1	1	1				2	3	2	1	1	0	78.981	38	1
sp|P50914|RL14_HUMAN	1	3	3	10.2	23.432							1	2			1	1									0	9.9147	9	1
sp|P50990|TCPQ_HUMAN	1	21	21	43.1	59.62	8	6	2	2	4	4	8	4	9	4	3	1	4	2	2		3	2	2	1	0	252.1	127	1
sp|P50991|TCPD_HUMAN	1	17	17	44	57.924	4	4	1	5	6	9	11	11	4		3		1	2	2	1	3	3	3	1	0	323.31	151	1
sp|P50995|ANX11_HUMAN	1	13	13	25.7	54.389	2	1	2	1	3	5	9	7	3	2				1	2	1		1			0	200.05	69	1
sp|P51003|PAPOA_HUMAN;sp|Q9NRJ5|PAPOB_HUMAN;sp|Q9BWT3|PAPOG_HUMAN	3	4;2;1	4;2;1	7.2	82.842							1		2					1							0	18.098	4	1
sp|P51114|FXR1_HUMAN	1	11	11	28.7	69.72	2	2		1	1	1	3	2	3	2	1				2						0	118.82	40	1
sp|P51116|FXR2_HUMAN	1	6	5	12.5	74.222							1	2	1	1					1						0	9.6919	5	1
sp|P51148|RAB5C_HUMAN	1	6	4	43.1	23.482	1	2	1	1		3	2	2	1	1	2	3	2	1		2	2	1	1	1	0	129.65	63	1
sp|P51149|RAB7A_HUMAN	1	9	9	53.1	23.489	4	4	3	3	1	6	8	5	5		1	2	2								0	282.97	77	1
sp|P51151|RAB9A_HUMAN;sp|Q9NP90|RAB9B_HUMAN	2	2;1	2;1	12.4	22.837						1	2				1		1								0	27.961	7	1
sp|P51153|RAB13_HUMAN	1	2	1	12.3	22.774									1												0	4.1485	1	1
sp|P51159|RB27A_HUMAN;sp|O00194|RB27B_HUMAN	2	2;1	2;1	7.7	24.868												1					1				0	3.8629	2	1
sp|P51398|RT29_HUMAN	1	10	10	24.9	45.566	2	1			2	2	2	3	4	4	2	1		1		1		1			0	55.673	62	1
sp|P51452|DUS3_HUMAN	1	4	4	28.1	20.478						1		2			1	1	1	1	2		1				0	21.335	19	1
sp|P51532|SMCA4_HUMAN	1	7	4	5.5	184.64							1	2				2	1		3			1			0	32.781	20	1
sp|P51553|IDH3G_HUMAN	1	5	5	19.1	42.794								2		1	1			3	1						0	63.295	11	1
sp|P51570|GALK1_HUMAN	1	2	2	5.6	42.272							1											1	1		0.0022687	2.3809	2	1
sp|P51571|SSRD_HUMAN	1	3	3	24.9	18.998								3	1				1								0	76.208	7	1
sp|P51572|BAP31_HUMAN	1	3	3	20.3	27.991	1	1		1	1	1	1	1					1		1						0	31.348	21	1
sp|P51610|HCFC1_HUMAN	1	19	19	20	208.73	1					1		1	5	2	2	3	2	1		1	7	3	5	7	0	96.174	74	1
sp|P51617|IRAK1_HUMAN	1	2	2	5.5	76.536									1					1	1						0	11.965	3	1
sp|P51636|CAV2_HUMAN	1	1	1	9.9	18.291													1								0.0012963	2.7093	1	1
sp|P51648|AL3A2_HUMAN;sp|P48448|AL3B2_HUMAN;sp|P43353|AL3B1_HUMAN	3	8;1;1	7;0;0	18.8	54.847		1						3	4			1	2	2	1						0	29.557	26	1
sp|P51649|SSDH_HUMAN	1	4	4	8.2	57.214								1								1				1	0	12.065	4	1
sp|P51659|DHB4_HUMAN	1	19	19	42	79.685	3	3			4	5	8	6	7	3	4	7	5	5	2	2	4	4	1		0	248.05	129	1
sp|P51665|PSMD7_HUMAN	1	4	4	21.3	37.025						2	2	1	1											1	0	9.2363	8	1
sp|P51688|SPHM_HUMAN	1	5	5	12	56.695								1			1	1					1				0	7.4987	9	1
sp|P51692|STA5B_HUMAN;sp|P42229|STA5A_HUMAN	2	3;1	3;1	5	89.865									1				2								0	4.7656	3	1
sp|P51784|UBP11_HUMAN	1	1	1	1	109.82						1	1														0	3.3721	2	1
sp|P51809|VAMP7_HUMAN	1	2	2	14.1	24.935												2	2	1							0	21.759	10	1
sp|P51812|KS6A3_HUMAN;sp|Q15349|KS6A2_HUMAN	2	7;1	6;1	11.6	83.735								1	1		2	2		2							0	12.32	8	1
sp|P51858|HDGF_HUMAN	1	6	6	33.3	26.788						1	1	2	2	1			1		2						0	73.973	23	1
sp|P51946|CCNH_HUMAN	1	1	1	5	37.643								1													0	4.0248	1	1
sp|P51948|MAT1_HUMAN	1	1	1	6.1	35.823															1	1					0	9.6792	4	1
sp|P51965|UB2E1_HUMAN;sp|Q96LR5|UB2E2_HUMAN;sp|Q969T4|UB2E3_HUMAN	3	1;1;1	1;1;1	5.7	21.404										1			1								0.00053865	3.0352	2	1
sp|P51970|NDUA8_HUMAN	1	3	3	22.1	20.105							1	1	1		1	2	1								0	15.1	8	1
sp|P51991|ROA3_HUMAN	1	3	3	9.8	39.594							5	1	2	2	2		1								0	30.183	14	1
sp|P52209|6PGD_HUMAN	1	9	9	23	53.139	1	1		1	3	2	4	6	2	3	1		1	3	1						0	97.95	57	1
sp|P52272|HNRPM_HUMAN	1	20	20	39.9	77.515	5	4	3	4	3	4	6	7	4	4	12	24	22	8	2	2	2	2	1	1	0	323.31	405	1
sp|P52292|IMA1_HUMAN	1	11	11	32.9	57.861						2	4	7	3	2	3	5	3	4		2	2	2		1	0	108.06	81	1
sp|P52294|IMA5_HUMAN	1	9	4	21.2	60.221							1	1	1		1	1	2								0	48.268	10	1
sp|P52306|GDS1_HUMAN	1	6	6	15.5	66.316								2	1		1		2	2		1					0	21.502	11	1
sp|P52429|DGKE_HUMAN	1	1	1	2.3	63.926													1								0.0010582	2.9073	1	1
sp|P52434|RPAB3_HUMAN	1	3	3	18	17.143	1							1													0	10.385	11	1
sp|P52435|RPB11_HUMAN;sp|Q9H1A7|RPB1C_HUMAN;sp|Q9GZM3|RPB1B_HUMAN	3	3;2;2	3;2;2	22.2	13.293													1			1				1	0	7.8593	3	1
sp|P52565|GDIR1_HUMAN	1	4	4	31.4	23.207	1	2	1	2	3	5	7	6	1												0	110.59	52	1
sp|P52566|GDIR2_HUMAN	1	1	1	6.5	22.988	1				1	1	1	1	1												0	3.1392	9	1
sp|P52594|AGFG1_HUMAN	1	4	4	12.3	58.259								1						1	2		2	1	1	1	0	42.382	29	1
sp|P52597|HNRPF_HUMAN	1	9	8	39.3	45.671	3	3	4	5	9	11	11	8	4	1	2	1				1					0	323.31	158	1
sp|P52630|STAT2_HUMAN	1	4	4	6	97.915								2		1											0	17.757	5	1
sp|P52655|TF2AA_HUMAN	1	2	2	7.4	41.513					1	2	1	1													0	20.753	11	1
sp|P52701|MSH6_HUMAN	1	12	12	12.9	152.78								4	4		1	1	1	2			1				0	29.047	13	1
sp|P52747|ZN143_HUMAN	1	1	1	3.6	68.895								1													0.0029652	2.183	1	1
sp|P52756|RBM5_HUMAN	1	3	3	4.2	92.153									1		2	2									0	5.1921	5	1
sp|P52758|UK114_HUMAN	1	4	4	38	14.494					1		1	1				1		2							0	13.39	9	1
sp|P52788|SPSY_HUMAN	1	3	3	8.2	41.268											1			1							0	3.5241	3	1
sp|P52789|HXK2_HUMAN	1	12	9	13.5	102.38						1	1		1	2	1		1	1		1	1	1			0	23.198	22	1
sp|P52815|RM12_HUMAN	1	5	5	35.4	21.348	2	3	3	2	4	3	3	3	1	1					1	1	2	2	1		0	74.339	116	1
sp|P52888|THOP1_HUMAN	1	5	5	11.5	78.839							1	1	2			1		2			1	1			0	28.441	15	1
sp|P52907|CAZA1_HUMAN	1	9	7	48.3	32.922	2				4	4	6	3			1	1					2	2	2	2	0	113.71	85	1
sp|P52948|NUP98_HUMAN	1	15	15	11.8	197.58	1						3	4	3	2	4	5	1			1					0	106.22	29	1
sp|P53004|BIEA_HUMAN	1	4	4	15.9	33.428								1		1		1					1				0.0027275	2.2231	2	1
sp|P53007|TXTP_HUMAN	1	4	4	19	34.012									1		1						1	2	2		0	22.112	43	1
sp|P53041|PPP5_HUMAN	1	5	5	15	56.878								1	1	1	1					1					0	17.384	4	1
sp|P53365|ARFP2_HUMAN	1	4	4	15.8	37.855	1				2	1	3	3		1	1	1	1								0	21.891	12	1
sp|P53367|ARFP1_HUMAN	1	12	12	38.6	41.738	4	2		1	2	4	3	5	4	4	2	2	3	2							0	137.04	69	1
sp|P53384|NUBP1_HUMAN	1	4	4	20.3	34.534							1		2					1							0	23.306	4	1
sp|P53396|ACLY_HUMAN	1	15	15	16.1	120.84	1					5	2	2	2		1	2	3	4		1	1			1	0	45.664	51	1
sp|P53582|MAP11_HUMAN	1	3	3	11.9	43.215											1	2	1	1		1					0	16.034	8	1
sp|P53597|SUCA_HUMAN	1	3	3	15.9	36.249										1	1	2	1	1		2	3	3	2	1	0	46.299	56	1
sp|P53609|PGTB1_HUMAN	1	1	1	3.4	42.368																	1	1			0.0013172	2.8586	3	1
sp|P53618|COPB_HUMAN	1	15	15	24.9	107.14		1			2	2	5	7	3	2	2	3	2	1	2	2	2	3	2		0	112.47	69	1
sp|P53621|COPA_HUMAN	1	18	18	21.4	138.34	1							2	4	1	4	5	2	2	1	1	3	3	2		0	114.73	45	1
sp|P53634|CATC_HUMAN	1	5	5	16.2	51.853					1	1	1	2	1	1		2				2	1	1			0	64.282	25	1
sp|P53675|CLH2_HUMAN	1	12	1	7.9	187.03																1	1		1		0	7.5278	8	1
sp|P53680|AP2S1_HUMAN	1	3	3	19.7	17.018	1						1	2				1									0	7.8755	6	1
sp|P53701|CCHL_HUMAN	1	2	2	17.9	30.601						1		2													0	4.9457	3	1
sp|P53801|PTTG_HUMAN	1	1	1	10	20.324									1		3	1	3	5							0	23.098	19	1
sp|P53803|RPAB4_HUMAN	1	1	1	31	7.0041										1											0	7.9754	1	1
sp|P53990|IST1_HUMAN	1	1	1	5.2	39.75					1	2	1														0	16.007	5	1
sp|P53992|SC24C_HUMAN	1	19	19	23.8	118.32							3	3				2	3	1	2	2	5	5	2	1	0	73.556	65	1
sp|P53999|TCP4_HUMAN	1	3	3	18.9	14.395							1				1	2		2							0	41.301	15	1
sp|P54105|ICLN_HUMAN	1	3	3	21.1	26.215												2	3	3			1				0	78.265	16	1
sp|P54136|SYRC_HUMAN	1	22	22	39.7	75.378		3	1	2	3	3	3	5	11	1	2	1	3		2		2	3	4	2	0	166.25	95	1
sp|P54289|CA2D1_HUMAN	1	1	1	1.3	124.57										1											0.0036514	2.0261	1	1
sp|P54577|SYYC_HUMAN	1	14	14	24.8	59.143	1	1					1	4	5	4							1			2	0	46.529	33	1
sp|P54578|UBP14_HUMAN	1	9	9	20.6	56.068	1	1			1	1	4	3	2			1	1	3			2	2	2	2	0	93.909	67	1
sp|P54619|AAKG1_HUMAN	1	4	4	12.1	37.579		1		1	1	1	1	1				2									0	5.1097	11	1
sp|P54652|HSP72_HUMAN	1	12	5	21.4	70.02								1	1	1	1	1	1		1						0	26.035	9	1
sp|P54709|AT1B3_HUMAN	1	4	4	23.7	31.512									2		1	1	2								0	14.162	8	1
sp|P54725|RD23A_HUMAN	1	7	7	28.9	39.609					1	2	4	3	2	1		1			1		1				0	51.513	33	1
sp|P54727|RD23B_HUMAN	1	6	6	25.9	43.171	1	1	1	1	3	4	2	3	3							1	1	1	1	1	0	109.17	68	1
sp|P54753|EPHB3_HUMAN;sp|P54760|EPHB4_HUMAN	2	6;2	5;1	9.7	110.33							2		1				2								0	14.523	5	1
sp|P54802|ANAG_HUMAN	1	6	6	14	82.265							1							3	1			1			0	6.1898	5	1
sp|P54803|GALC_HUMAN	1	3	3	5.5	77.032										1	1	2									0	3.6256	5	1
sp|P54819|KAD2_HUMAN	1	8	8	36.8	26.477	1	2					4	2			3	3	1	2	3						0	211.32	61	1
sp|P54852|EMP3_HUMAN	1	2	2	13.5	18.429												1				1	1				0	4.6875	3	1
sp|P54868|HMCS2_HUMAN	1	2	1	4.7	56.635								1			1										0	4.2049	2	1
sp|P54886|P5CS_HUMAN	1	14	14	28.6	87.301		1					1	4	2		3	4	3	4	1		2	2	2		0	45.985	57	1
sp|P54920|SNAA_HUMAN;sp|Q9H115|SNAB_HUMAN	2	11;1	11;1	51.2	33.232		1		1	1	2	3	6	1	1	3	2	4	1	1	3		2	2	2	0	304.76	60	1
sp|P55010|IF5_HUMAN	1	6	6	16.9	49.222						3	2	2	1									1			0	20.977	8	1
sp|P55011|S12A2_HUMAN	1	10	10	10.5	131.45		2						2	2		1	3	2	1		2	2	2	1	2	0	67.471	37	1
sp|P55036|PSMD4_HUMAN;sp|A2A3N6|PIPSL_HUMAN	2	10;2	10;2	34.7	40.736	1				4	3	6	8	2	1					1			1	1	1	0	120.85	42	1
sp|P55039|DRG2_HUMAN	1	2	2	8.5	40.746									1										1		0.0029681	2.1966	2	1
sp|P55060|XPO2_HUMAN	1	24	24	23.8	110.42	3	2		2	6	8	6	7	5	2	3	5	5	4	2		1	2	2	2	0	246.38	153	1
sp|P55061|BI1_HUMAN	1	1	1	3.4	26.537													1								0.0098151	1.3482	2	1
sp|P55072|TERA_HUMAN	1	33	33	53.2	89.321	5	9	6	9	12	28	27	25	14	3	6	5	5	4	1	2	3	1	1	2	0	323.31	488	1
sp|P55081|MFAP1_HUMAN	1	1	1	3	51.958									1												0	4.8099	1	1
sp|P55084|ECHB_HUMAN	1	16	16	26.8	51.294	1	2			2	2	3	3	2	1	2	1	3	1	1	2	2	1	2	1	0	202.82	82	1
sp|P55145|MANF_HUMAN	1	7	7	32.4	20.7	3	1	1		3	1	2	3	1						2	1					0	62.978	50	1
sp|P55196|AFAD_HUMAN	1	8	8	7.2	206.8								1	1	2		1	1	1			2				0	19.512	11	1
sp|P55209|NP1L1_HUMAN	1	9	9	25.3	45.374		1	2	3	2	2	3	3			2	4	6	3			1	1			0	273.97	62	1
sp|P55210|CASP7_HUMAN	1	2	2	10.9	34.276					1	1											1	1	1		0.0055077	1.8217	6	1
sp|P55263|ADK_HUMAN	1	8	8	27.6	40.545					1	2	1	2	2	1			1	1		2	2	2	1		0	67.788	29	1
sp|P55265|DSRAD_HUMAN	1	10	10	13.5	136.06								2	1		2	3	2		5	1	1	1			0	54.268	23	1
sp|P55327|TPD52_HUMAN	1	8	8	49.6	24.327	2	3			1	2	2	6	5			1	1	1				7	2	2	0	169.39	67	1
sp|P55735|SEC13_HUMAN	1	5	5	34.5	35.54				1	2	1	5	2				1					1	1	1		0	53.026	17	1
sp|P55769|NH2L1_HUMAN	1	4	4	15.6	14.173										1	2	1	1	1		1	1	1	1		0	66.538	40	1
sp|P55786|PSA_HUMAN;sp|A6NEC2|PSAL_HUMAN	2	16;5	16;5	20.9	103.28	2	3			1	1			2	2	5	10	9	3			4	3	3	1	0	132.95	83	1
sp|P55789|ALR_HUMAN	1	1	1	12.2	23.449					1	1	1														0	26.188	19	1
sp|P55795|HNRH2_HUMAN	1	8	5	24.7	49.263						3	5	7	6	2	1										0	108.92	46	1
sp|P55809|SCOT1_HUMAN;sp|Q9BYC2|SCOT2_HUMAN	2	5;1	5;1	14.6	56.157									1		1		2	3	1						0	76.669	15	1
sp|P55884|EIF3B_HUMAN	1	15	15	24.7	92.48	3	2		3	6	5	5	4	4	1	2	2	1				1	3	3	2	0	137.79	130	1
sp|P55899|FCGRN_HUMAN	1	1	1	7.9	39.743											1	1									0.0013024	2.7433	3	1
sp|P55957|BID_HUMAN	1	2	2	7.7	21.994																	1				0	8.2941	2	1
sp|P56134|ATPK_HUMAN	1	3	3	39.4	10.918					1				1		1		2	2							0	23.505	11	1
sp|P56179|DLX6_HUMAN;sp|P56177|DLX1_HUMAN	2	1;1	1;1	6.9	19.708								1													0.0096176	1.3771	2	1
sp|P56181|NDUV3_HUMAN	1	1	1	14.8	11.94												1	2								0	8.6186	21	1
sp|P56192|SYMC_HUMAN	1	14	14	24	101.11	1				1	1	3	5	6		5	3	4	6	1					1	0	82.951	54	1
sp|P56199|ITA1_HUMAN	1	6	6	4	130.85					1						1	1		1							0	19.059	10	1
sp|P56377|AP1S2_HUMAN	1	3	1	15.3	18.615							1														0	3.4672	1	1
sp|P56385|ATP5I_HUMAN	1	3	3	17.4	7.9331																	1	2	2	1	0	6.3203	11	1
sp|P56537|IF6_HUMAN	1	6	6	36.3	26.599	1	1	1	1	3	2	2		2	2			2	2	2						0	194.5	68	1
sp|P56545|CTBP2_HUMAN	1	9	8	25.6	48.944	1	1			2	1	1	1	2	2				1	1	1	1	1			0	176.22	30	1
sp|P56556|NDUA6_HUMAN	1	1	1	5.2	17.871													1								0.0061568	1.7064	3	1
sp|P56945|BCAR1_HUMAN	1	8	8	15.3	93.371					2	3	4		2		4	1				1	1	1			0	39.55	23	1
sp|P56962|STX17_HUMAN	1	2	2	7.9	33.403								1	1												0.0068526	1.6745	2	1
sp|P57081|WDR4_HUMAN	1	3	3	10.7	45.489										1				2							0	6.0885	1	1
sp|P57088|TMM33_HUMAN	1	2	2	8.5	27.978													1					1	1	1	0	12.442	9	1
sp|P57105|SYJ2B_HUMAN	1	4	4	38.6	15.928		1				1	1	2	1		1	1									0	53.161	12	1
sp|P57678|GEMI4_HUMAN	1	2	2	3	120.04								1							1						0	8.6956	3	1
sp|P57721|PCBP3_HUMAN	1	3	1	12.4	39.465												1									0.0010571	2.8911	1	1
sp|P57723|PCBP4_HUMAN	1	3	3	10.4	41.481												1		1				1	1		0	7.9705	5	1
sp|P57737|CORO7_HUMAN	1	2	2	3.8	100.6									1						1						0	8.5098	1	1
sp|P57740|NU107_HUMAN	1	14	14	18.4	106.37					1	3	4		2		1	2	1	1	2		2	2			0	62.647	36	1
sp|P57772|SELB_HUMAN	1	3	3	7.2	65.304											1			1	1						0.0036693	2.0751	3	1
sp|P58107|EPIPL_HUMAN	1	27	25	22.1	555.61	1	1		2	2	2	4	6	4	5	5	7	4	6		1	3	1	2	2	0	168.95	89	1
sp|P58335|ANTR2_HUMAN	1	2	2	2.9	53.666												1									0	4.4902	3	1
sp|P58546|MTPN_HUMAN	1	3	3	33.9	12.895	1	2		1	2	3	4	2	1												0	21.205	22	1
sp|P59998|ARPC4_HUMAN	1	5	5	33.9	19.667	3	3	1	1		1	1	2	3	2	3	2	4	3							0	76.349	48	1
sp|P60033|CD81_HUMAN	1	3	3	25	25.809		1				1	1		1			1				1	1	1	1	1	0	43.138	20	1
sp|P60059|SC61G_HUMAN	1	2	2	36.8	7.7412				3	1	2								1	1						0	11.043	29	1
sp|P60174|TPIS_HUMAN	1	11	11	51.7	30.791	4	1	3	6	5	7	6	5	2	3	9	9	7	4	2	4	4	2	2	3	0	323.31	207	1
sp|P60228|EIF3E_HUMAN	1	9	9	23.1	52.22	1		1		1	1	2	3	1		2	1	1	3	4		1				0	96.069	55	1
sp|P60510|PP4C_HUMAN	1	5	4	19.5	35.08									1			1	1		1						0	89.877	6	1
sp|P60602|ROMO1_HUMAN	1	1	1	21.5	8.1828											1	2	1	2	2						0	7.6011	11	1
sp|P60660|MYL6_HUMAN;sp|P14649|MYL6B_HUMAN	2	8;2	8;2	55.6	16.93	2	2	4	4	3	3	1	2	2	2	2	2	4	3							0	306.88	111	1
sp|P60709|ACTB_HUMAN	1	21	1	66.1	41.736			2	1	7	10	1														0	323.31	91	1
sp|P60842|IF4A1_HUMAN	1	16	12	34	46.153	2	3	2	2	4	4	5	4	1	1	1	1	1	3	48	2	2	2	1	1	0	218.61	196	1
sp|P60866|RS20_HUMAN	1	3	3	10.1	13.373	2	1				1	1	1	1	2	2	1	1								0	63.311	52	1
sp|P60891|PRPS1_HUMAN;sp|P21108|PRPS3_HUMAN	2	5;2	2;0	21.4	34.834						2	1	3	1								1	2	2		0	35.593	30	1
sp|P60900|PSA6_HUMAN	1	6	6	25.6	27.399	1				1			1	3			1	1		2	1					0	46.291	41	1
sp|P60903|S10AA_HUMAN	1	2	2	35.1	11.203						1	1	2						1							0	64.021	5	1
sp|P60953|CDC42_HUMAN	1	3	3	21.5	21.258	1	1		1	1	2	2	2			1					1	1	1	1		0	26.077	43	1
sp|P60981|DEST_HUMAN	1	3	3	13.9	18.506				1	1	2	1	1													0	31.68	16	1
sp|P60983|GMFB_HUMAN	1	3	3	19.7	16.713					2	1		2													0	19.55	9	1
sp|P61006|RAB8A_HUMAN	1	2	1	12.1	23.668												2		2							0	5.5186	6	1
sp|P61009|SPCS3_HUMAN	1	1	1	6.7	20.313											1	1									0	40.556	5	1
sp|P61011|SRP54_HUMAN	1	8	8	22.2	55.704					1		1	4	2	3	1	1									0	37.91	12	1
sp|P61019|RAB2A_HUMAN	1	7	3	39.6	23.545	2	3			1	3	2	3	3	3	3	3	2	1		1	1				0	94.016	43	1
sp|P61020|RAB5B_HUMAN	1	5	3	32.1	23.707									1		1	1					1			1	0	15.725	5	1
sp|P61026|RAB10_HUMAN;sp|Q92930|RAB8B_HUMAN;sp|P59190|RAB15_HUMAN	3	6;1;1	5;0;0	26.5	22.541								2	2	3	1	1	2								0	52.218	29	1
sp|P61081|UBC12_HUMAN	1	3	3	19.7	20.9							2	1	1												0	8.7594	3	1
sp|P61086|UBE2K_HUMAN	1	5	5	27.5	22.406	1				2	2	2							2	1						0	27.629	15	1
sp|P61088|UBE2N_HUMAN;sp|Q5JXB2|UE2NL_HUMAN	2	3;2	3;2	16.4	17.138	1	1					1		1	2	2	2	2	2				1			0	11.092	36	1
sp|P61106|RAB14_HUMAN	1	10	10	53.5	23.897	1	1		1	2	1	2	1	1		2	3	1	3	1	2	2				0	40.003	34	1
sp|P61158|ARP3_HUMAN;sp|Q9C0K3|ARP3C_HUMAN;sp|Q9P1U1|ARP3B_HUMAN	3	11;1;1	11;1;1	39.5	47.371	1	1			1	3	1	4	3	2	5	5	4	4		2	1	1	1	1	0	80.534	96	1
sp|P61160|ARP2_HUMAN	1	9	9	25.6	44.76				1	2	1	4	3	6	2	2	3				1	1	1	1		0	118.68	58	1
sp|P61163|ACTZ_HUMAN	1	4	4	19.4	42.613					1		1	4	1	1						1	1		1	2	0	18.449	19	1
sp|P61165|TM258_HUMAN	1	1	1	10.1	9.0788							1														0.0005401	3.0665	3	1
sp|P61201|CSN2_HUMAN	1	7	7	17.6	51.596							1			1	1	2				1	3	1	2	2	0	18.121	16	1
sp|P61221|ABCE1_HUMAN	1	6	6	15.2	67.314	1									1	1	2	1	3	2	1	2	1	1		0	51.826	39	1
sp|P61224|RAP1B_HUMAN;sp|A6NIZ1|RP1BL_HUMAN	2	8;6	4;3	44	20.825						1	2	2	5			3	2								0	101.67	34	1
sp|P61225|RAP2B_HUMAN	1	5	3	43.2	20.504					1		2	1	1			1	1								0	17.127	8	1
sp|P61244|MAX_HUMAN	1	1	1	13.1	18.275										1	1										0.0013072	2.7853	2	1
sp|P61247|RS3A_HUMAN	1	7	7	28.8	29.945		1	1	1	1	1	5	2	1	1			1	3	2	2				1	0	168.81	92	1
sp|P61289|PSME3_HUMAN	1	7	7	36.2	29.506	1	3	2	2	4	6	4	6	5	1				2			1	1			0	126.21	62	1
sp|P61313|RL15_HUMAN	1	2	2	9.3	24.146							1	1													0.0055024	1.8149	2	1
sp|P61326|MGN_HUMAN	1	3	1	17.1	17.163				1		1															0.0036928	2.1365	2	1
sp|P61353|RL27_HUMAN	1	3	3	22.1	15.798		1	1	1	1	1	1	1	2												0	13.367	21	1
sp|P61421|VA0D1_HUMAN	1	5	5	18.5	40.329					1	2	2	2	1			1	1	1							0	32.725	14	1
sp|P61457|PHS_HUMAN	1	2	2	13.5	11.999									1	1											0	3.22	2	1
sp|P61513|RL37A_HUMAN	1	1	1	19.6	10.275																2	1	2	2		0	117.51	40	1
sp|P61586|RHOA_HUMAN	1	5	1	28.5	21.768						2	3									1	2	1	1	2	0	66.282	34	1
sp|P61587|RND3_HUMAN	1	2	2	13.5	27.368									1	1					1						0	6.5476	4	1
sp|P61604|CH10_HUMAN	1	4	4	42.2	10.932	4	2			1	2	1	1	2			3	2				2	2	2	1	0	114.49	111	1
sp|P61758|PFD3_HUMAN	1	1	1	5.1	22.658										1	1	2									0	7.8322	5	1
sp|P61803|DAD1_HUMAN	1	2	2	19.5	12.497		2	1	1	1		1	1	3	1	1		1		1	1	1	1	1	1	0	29.67	45	1
sp|P61812|TGFB2_HUMAN	1	2	2	7.5	47.747												1		1	1						0.0022647	2.3574	3	1
sp|P61916|NPC2_HUMAN	1	2	2	25.8	16.57						2	1	1	2	2	3	4	2	2							0	106.12	116	1
sp|P61923|COPZ1_HUMAN	1	5	5	36.2	20.198					1	1	2	4	1												0	32.987	22	1
sp|P61960|UFM1_HUMAN	1	2	2	58.8	9.1175	1	1							2		1	1	1	1							0	7.6024	10	1
sp|P61962|DCAF7_HUMAN	1	1	1	4.4	38.926								2													0.0010596	2.913	3	1
sp|P61964|WDR5_HUMAN	1	7	7	36.8	36.588					1	1	4		1	2	1				2						0	52.654	27	1
sp|P61966|AP1S1_HUMAN;sp|Q96PC3|AP1S3_HUMAN	2	4;1	2;0	20.9	18.733						1							2								0	5.9994	4	1
sp|P61970|NTF2_HUMAN	1	5	5	63	14.478							1	2	2					1							0	54.312	10	1
sp|P61978|HNRPK_HUMAN	1	13	13	41.3	50.976	3	8	9	8	8	7	5	9	9	1	6	5	5	5	4	5	3	7	28	4	0	323.31	484	1
sp|P61981|1433G_HUMAN	1	5	3	28.7	28.302	2	2	1	2	6	3	3	3			2	1									0	139.62	64	1
sp|P62070|RRAS2_HUMAN	1	2	1	13.7	23.399											1										0.0041023	1.9256	1	1
sp|P62072|TIM10_HUMAN	1	1	1	14.4	10.333								1													0	3.8161	2	1
sp|P62081|RS7_HUMAN	1	4	4	23.7	22.127	1	1	1	1	1	1	2	1	1										1		0	31.67	56	1
sp|P62136|PP1A_HUMAN	1	11	2	35.8	37.512	1						2				1	3	2	1							0	19.924	14	1
sp|P62140|PP1B_HUMAN	1	11	4	35.8	37.186	2	1	1	1	1	5	4	4		4	2	4	1	1			1				0	138.09	77	1
sp|P62158|CALM_HUMAN;sp|P27482|CALL3_HUMAN	2	8;1	8;1	54.4	16.837	3	5	3	6	9	9	11	6	3	2											0	323.31	159	1
sp|P62166|NCS1_HUMAN	1	2	2	14.7	21.878					1	2															0	6.3843	7	1
sp|P62191|PRS4_HUMAN	1	9	9	25.2	49.184		1	1	1	2	2	5	4	1	2	1	3	2	4							0	112.68	48	1
sp|P62195|PRS8_HUMAN	1	14	13	37.2	45.626	1	2		1	2	4	7	9	3	2	2	3	2	2		1	2	2	2	1	0	271.27	122	1
sp|P62241|RS8_HUMAN	1	6	6	26.4	24.205		2	1		1	2	2	3	4	3	1	1									0	177.15	29	1
sp|P62244|RS15A_HUMAN	1	1	1	6.9	14.839											1	2									0.0022624	2.3539	5	1
sp|P62249|RS16_HUMAN	1	7	7	28.1	16.445	2	5			1	1	2	2	1				2		1			1	1	1	0	46.935	54	1
sp|P62253|UB2G1_HUMAN	1	1	1	5.9	19.509							1														0	7.8444	2	1
sp|P62256|UBE2H_HUMAN	1	1	1	8.2	20.655												1									0.0015484	2.6604	1	1
sp|P62258|1433E_HUMAN	1	10	8	47.5	29.174		4	4	4	7	9	8	7	1	2	4	7	1								0	244.16	179	1
sp|P62263|RS14_HUMAN	1	5	5	30.5	16.273	1	1	1	1	2	5	3	3		1					1						0	87.05	78	1
sp|P62266|RS23_HUMAN	1	1	1	7.7	15.807																	1	1	1		0	3.3011	17	1
sp|P62269|RS18_HUMAN	1	5	5	15.8	17.718		1				1	1					1		1			1	1	1	1	0	89.106	44	1
sp|P62277|RS13_HUMAN	1	4	4	17.9	17.222	1	1					1	1	2								1	1	1	1	0	31.745	38	1
sp|P62280|RS11_HUMAN	1	3	3	24.7	18.431					1	1		2	2							2					0	17.574	14	1
sp|P62304|RUXE_HUMAN	1	3	3	29.3	10.803	1	1	1	1			1						1			1	2	2	2	2	0	66.405	54	1
sp|P62308|RUXG_HUMAN;sp|A8MWD9|RUXGL_HUMAN	2	2;2	2;2	17.1	8.496								1	1												0	8.3622	4	1
sp|P62310|LSM3_HUMAN	1	3	3	40.2	11.845	1				1	1				1	1			1		1	1			1	0	11.506	17	1
sp|P62314|SMD1_HUMAN	1	5	5	45.4	13.281		1			1	1	1	2	1		1	1	1	2	1						0	173.48	47	1
sp|P62316|SMD2_HUMAN	1	2	2	16.1	13.527		1			2	1	2	1	2												0	27.395	12	1
sp|P62318|SMD3_HUMAN	1	5	5	53.2	13.916		1	1	2	1	2	5	4	2	2	5	4	2	1					1		0	130.6	75	1
sp|P62328|TYB4_HUMAN	1	3	3	31.8	5.0526					1	2	3	2													0	96.525	47	1
sp|P62330|ARF6_HUMAN	1	3	3	24.6	20.082						1						1	3	2							0	26.268	8	1
sp|P62333|PRS10_HUMAN	1	8	8	29.8	44.172		1			1	2	3	2	1		2	2	2	4			1				0	162.38	39	1
sp|P62380|TBPL1_HUMAN	1	1	1	5.9	20.886													1								0.00054054	3.0751	1	1
sp|P62424|RL7A_HUMAN	1	7	7	25.9	29.995	3	2				2			1	1	4	4	4	4		1	2	2	1	1	0	190.56	78	1
sp|P62487|RPB7_HUMAN	1	3	3	25	19.294							1	1		1							1				0	5.0171	3	1
sp|P62491|RB11A_HUMAN	1	5	1	27.8	24.393											2	3									0	12.204	20	1
sp|P62495|ERF1_HUMAN	1	9	9	30.9	49.03						1	1	3	4	1	1		2				2	4	4	3	0	56.975	43	1
sp|P62633|CNBP_HUMAN	1	2	2	8.5	19.463											2		1	1							0	9.1169	9	1
sp|P62699|YPEL5_HUMAN	1	2	2	11.6	13.841											1	1	1								0	11.519	5	1
sp|P62701|RS4X_HUMAN;sp|Q8TD47|RS4Y2_HUMAN	2	6;1	6;1	25.1	29.597	1	2	1	1	1	2	3	4	2	3	2	2	4	1		1	1	1			0	156.34	71	1
sp|P62745|RHOB_HUMAN	1	2	1	14.8	22.123								1	1												0.0010607	2.9215	2	1
sp|P62750|RL23A_HUMAN	1	1	1	8.3	17.695		1	1			1	2														0	4.0423	8	1
sp|P62753|RS6_HUMAN	1	3	3	10.8	28.68	1				2	2	2														0	51.034	13	1
sp|P62805|H4_HUMAN	1	9	9	63.1	11.367	2	8	5	5	8	4	25	7	8	2	11	9	11	8	5	7	8	7	8	7	0	323.31	373	1
sp|P62820|RAB1A_HUMAN	1	5	2	36.6	22.677				1					2												0	66.871	7	1
sp|P62826|RAN_HUMAN	1	5	5	16.2	24.423	1			1	1	1	1		1	1	1	2	2	1							0	97.869	26	1
sp|P62829|RL23_HUMAN	1	2	2	25	14.865				1	1	2			2		3	4	3	5							0	86.841	42	1
sp|P62834|RAP1A_HUMAN	1	6	2	29.9	20.987									1		1	1	1								0	7.3644	6	1
sp|P62837|UB2D2_HUMAN;sp|P61077|UB2D3_HUMAN;sp|Q9Y2X8|UB2D4_HUMAN;sp|P51668|UB2D1_HUMAN	4	3;3;1;1	3;3;1;1	36.1	16.735							1								1	1	1	1	1	1	0	20.34	25	1
sp|P62841|RS15_HUMAN	1	2	2	13.1	17.04						1	4	3													0	57.652	57	1
sp|P62847|RS24_HUMAN	1	2	2	19.5	15.423								1							2						0	7.4735	6	1
sp|P62851|RS25_HUMAN	1	4	4	24	13.742	5	2	1	1		1		1		2	2	3	4	3							0	66.99	69	1
sp|P62854|RS26_HUMAN	1	1	1	13	13.015		1	1	1	1	1	2	2													0	9.0853	18	1
sp|P62857|RS28_HUMAN	1	1	1	17.4	7.8409	2	1	1	2	2	2	2	2													0	151.91	40	1
sp|P62861|RS30_HUMAN	1	1	1	16.9	6.6478																1	1	1	1	1	0	7.2011	17	1
sp|P62873|GBB1_HUMAN	1	11	8	50.9	37.377		1			4	5	8	9	1	1	2	2	3								0	321.04	61	1
sp|P62875|RPAB5_HUMAN	1	1	1	13.4	7.645												1	1								0.0041132	1.9577	3	1
sp|P62877|RBX1_HUMAN	1	1	1	16.7	12.274						1															0	12.922	2	1
sp|P62879|GBB2_HUMAN	1	8	4	27.1	37.331					1	2	1	2	1		1	1	1								0	70.321	13	1
sp|P62888|RL30_HUMAN	1	4	4	34.8	12.784			1	1	2	2	2	1					2				1	2	2	2	0	231.18	58	1
sp|P62899|RL31_HUMAN	1	1	1	11.2	14.463																2	2	2			0	27.04	14	1
sp|P62906|RL10A_HUMAN	1	8	8	33.2	24.831					2	3	2	3	4	1		3	3	1	4			1	1	1	0	180.52	79	1
sp|P62910|RL32_HUMAN	1	1	1	10.4	15.86																	1	2	1		0	4.1177	8	1
sp|P62913|RL11_HUMAN	1	3	3	20.2	20.252	1	1	1	2	1	1			1	1	3	2	2	2							0	30.391	42	1
sp|P62917|RL8_HUMAN	1	2	2	11.7	28.024								1	2												0	31.024	7	1
sp|P62937|PPIA_HUMAN;sp|Q9Y536|PAL4A_HUMAN	2	12;1	12;1	66.7	18.012	6	7	8	9	8	10	8	7	7	7	14	4	10	3	2	3	3	2	1	3	0	323.31	397	1
sp|P62942|FKB1A_HUMAN	1	3	3	27.8	11.951									2			1									0	64.438	6	1
sp|P62979|RS27A_HUMAN;sp|P62987|RL40_HUMAN;sp|P0CG47|UBB_HUMAN;sp|P0CG48|UBC_HUMAN	4	5;4;4;4	5;4;4;4	35.3	17.965	4	3	2	2	1	2	2	2	3	1		1			1						0	258.52	89	1
sp|P62993|GRB2_HUMAN	1	2	2	12	25.206		1				1						1									0.0013055	2.7738	3	1
sp|P62995|TRA2B_HUMAN	1	2	2	12.8	33.665						1	1	3													0	7.9866	6	1
sp|P63000|RAC1_HUMAN;sp|P60763|RAC3_HUMAN	2	4;3	2;1	7.3	21.45																	1	2	1		0	19.703	20	1
sp|P63010|AP2B1_HUMAN	1	27	17	37.2	104.55	1	3			1	3	11	9	9	5	5	5	6	6	1	1	3	3	2	1	0	250.11	197	1
sp|P63027|VAMP2_HUMAN	1	3	1	34.5	12.663								2													0	15.721	3	1
sp|P63092|GNAS2_HUMAN;sp|Q5JWF2|GNAS1_HUMAN;sp|P38405|GNAL_HUMAN;sp|P11488|GNAT1_HUMAN;sp|P19087|GNAT2_HUMAN;sp|A8MTJ3|GNAT3_HUMAN	6	8;8;2;1;1;1	7;7;1;0;0;0	16.8	45.664					1	1	1	1	1						1						0	51.47	11	1
sp|P63096|GNAI1_HUMAN;sp|P09471|GNAO_HUMAN	2	5;2	2;0	15.5	40.361						1	2				1	1	1	2							0	12.344	11	1
sp|P63104|1433Z_HUMAN	1	10	8	42.4	27.745	1	6	7	9	9	10	7	7	6	3	2	3	2								0	323.31	293	1
sp|P63162|RSMN_HUMAN;sp|P14678|RSMB_HUMAN	2	4;4	4;4	17.9	24.614	1						1	1	4	1								1			0	10.14	10	1
sp|P63167|DYL1_HUMAN	1	1	1	24.7	10.366					2	3	2														0	26.518	9	1
sp|P63172|DYLT1_HUMAN	1	4	4	46	12.452										2	1	3	1	1			1				0	66.254	29	1
sp|P63208|SKP1_HUMAN	1	2	2	25.2	18.658						1	2						2	2							0	46.003	26	1
sp|P63218|GBG5_HUMAN	1	1	1	39.7	7.3184																1	1				0	9.2092	7	1
sp|P63220|RS21_HUMAN	1	5	5	39.8	9.1113		1	2	2	3	3				1	2	3									0	144.12	62	1
sp|P63241|IF5A1_HUMAN;sp|Q6IS14|IF5AL_HUMAN;sp|Q9GZV4|IF5A2_HUMAN	3	8;5;3	8;5;3	61.7	16.832				1	3	7	5	4	4	1	2	3			1						0	72.117	70	1
sp|P63244|GBLP_HUMAN	1	14	14	58.4	35.076	4	3	2	4	4	4	8	4	2	5	2	3	4	3	3	2	2	3	3	1	0	306.4	135	1
sp|P63261|ACTG_HUMAN;sp|A5A3E0|POTEF_HUMAN	2	22;6	2;0	66.4	41.792	5	12	15	17	29	27	51	45	20	10	14	15	15	14	8	8	7	5	7	9	0	323.31	1110	1
sp|P63267|ACTH_HUMAN;sp|P62736|ACTA_HUMAN	2	13;13	1;1	32.7	41.876							1		1	1				1		1		1	1		0	3.3617	7	1
sp|P63272|SPT4H_HUMAN	1	2	2	21.4	13.193																		1	1	2	0	9.6297	7	1
sp|P63279|UBC9_HUMAN	1	6	6	34.8	18.007								2	1			3	3	1	2		1	1	1		0	39.144	48	1
sp|P63313|TYB10_HUMAN	1	1	1	31.8	5.0256		1	1	1	3	3	4														0	106.81	55	1
sp|P67775|PP2AA_HUMAN;sp|P62714|PP2AB_HUMAN	2	8;6	7;5	40.8	35.594					2	2	2	4	2		2	3	1			2	2	2			0	102.96	37	1
sp|P67809|YBOX1_HUMAN;sp|Q9Y2T7|YBOX2_HUMAN	2	8;3	5;0	20.4	35.924		1		2	2	1	2	1	1												0	139.23	26	1
sp|P67812|SC11A_HUMAN	1	2	2	9.5	20.625											1		1	1							0	3.5133	3	1
sp|P67870|CSK2B_HUMAN	1	1	1	10.7	24.942								1													0	3.6681	2	1
sp|P67936|TPM4_HUMAN	1	4	2	19.4	28.521					1	2	2														0	27.687	6	1
sp|P68032|ACTC_HUMAN;sp|P68133|ACTS_HUMAN	2	14;12	1;1	32.6	42.019			2	2	2	3	6	5	4	4	1		1	2	2	3	2	2	3	4	0	167.46	83	1
sp|P68036|UB2L3_HUMAN	1	4	4	51.9	17.861							1		1				1	1			1	1	1		0	26.207	11	1
sp|P68104|EF1A1_HUMAN;sp|Q5VTE0|EF1A3_HUMAN	2	14;13	6;6	51.9	50.14	1	4	4	4	4	6	11	14	10	5	3	8	6	9	5	4	4	2	2	2	0	323.31	334	1
sp|P68363|TBA1B_HUMAN	1	18	0	56.5	50.151	4	12	12	8	8	10	16	15	12	6	15	13	13	23	17	8	11	5	6	2	0	323.31	664	1
sp|P68366|TBA4A_HUMAN;sp|Q9H853|TBA4B_HUMAN	2	15;1	4;0	49.3	49.924	2				3	3	3	2													0	15.822	14	1
sp|P68371|TBB4B_HUMAN	1	16	2	50.1	49.83	2	22	4	7	6	5	10	11	5	2	5	8	12	1	5	5	9	23	29	20	0	323.31	736	1
sp|P68402|PA1B2_HUMAN	1	2	2	3.9	25.569							1														0.0018046	2.6527	1	1
sp|P68871|HBB_HUMAN;sp|P02042|HBD_HUMAN	2	4;2	3;1	39.5	15.998							4				1		1		1	1	1	1	1	1	0	17.807	15	1
sp|P69905|HBA_HUMAN	1	4	2	26.1	15.257							1														0	8.1993	2	1
sp|P78310|CXAR_HUMAN	1	6	6	18.1	40.029					1				1			1		1							0	20.408	6	1
sp|P78316|NOP14_HUMAN	1	1	1	1.6	97.667							1														0.0041152	1.9656	1	1
sp|P78318|IGBP1_HUMAN	1	2	2	7.7	39.221							1		1												0	4.7877	2	1
sp|P78324|SHPS1_HUMAN	1	1	1	2.6	54.966												1									0.00053807	3.0255	2	1
sp|P78330|SERB_HUMAN	1	5	5	27.1	25.007	1						1	2						1	2	1	1	1	1	1	0	15.351	31	1
sp|P78344|IF4G2_HUMAN	1	15	15	23.5	102.36		2			2	2	2	7	4	1	1	2	1	3		3	3	4	4	2	0	110.35	88	1
sp|P78346|RPP30_HUMAN	1	3	3	12.3	29.321						1							1				1				0	6.8873	3	1
sp|P78347|GTF2I_HUMAN	1	16	16	19.2	112.42	1					1		4	3		1		3	1			4	2	2	1	0	68.308	35	1
sp|P78356|PI42B_HUMAN	1	1	1	3.4	47.377							1														0	4.2043	1	1
sp|P78357|CNTP1_HUMAN	1	2	2	2.1	156.26																1	3				0.0020284	2.4676	6	1
sp|P78371|TCPB_HUMAN	1	20	20	52.7	57.488	10	3	3	3	8	13	17	13	5	4	4	6	5	6	3	1	1			1	0	323.31	320	1
sp|P78406|RAE1L_HUMAN	1	7	7	35.1	40.968						1	1	1	3		1	2	1	1				1			0	34.91	21	1
sp|P78417|GSTO1_HUMAN	1	3	3	14.5	27.566	1				1		1			1								1	1	1	0	8.9921	11	1
sp|P78527|PRKDC_HUMAN	1	67	67	19.1	469.08	4	2			3	10	14	18	9	3	8	14	5	2		6	10	12	11	7	0	323.31	260	1
sp|P78536|ADA17_HUMAN	1	3	3	3	93.02													1	1			1	1	1	2	0	9.1541	16	1
sp|P78563|RED1_HUMAN	1	3	3	5.9	80.762												2		1							0	3.9841	3	1
sp|P80188|NGAL_HUMAN	1	7	7	50.5	22.588	1	1				1	2	2		3	4	5	3	2		2	2	3			0	89.62	73	1
sp|P80217|IN35_HUMAN	1	2	2	9.4	31.546											1	1	1				1	1	1		0	5.7208	8	1
sp|P80303|NUCB2_HUMAN	1	5	5	18.1	50.195							3	4	1			1	1								0	20.845	18	1
sp|P80723|BASP1_HUMAN	1	4	4	25.1	22.693	2	2			2	2	3	3	4												0	96.759	94	1
sp|P82094|TMF1_HUMAN	1	9	9	13.3	122.84								2	1	1		2	3			1		1	1		0	24.065	18	1
sp|P82650|RT22_HUMAN	1	8	8	18.3	41.28	3	2			2		3	3							1	1	2	2	1	3	0	84.949	77	1
sp|P82663|RT25_HUMAN	1	2	2	7.5	20.116																2	2	1			0	6.3437	11	1
sp|P82664|RT10_HUMAN	1	3	3	15.4	22.999					1	1			1	1											0	8.6209	4	1
sp|P82673|RT35_HUMAN	1	5	5	27.2	36.844							1		1	2		2	2	2				1	1		0	54.52	29	1
sp|P82909|RT36_HUMAN	1	1	1	11.7	11.466								2	1												0	11.772	3	1
sp|P82912|RT11_HUMAN	1	4	4	36.1	20.616	1								2			2									0	40.661	6	1
sp|P82930|RT34_HUMAN	1	2	2	16.1	25.65								1										1	1	1	0	11.092	6	1
sp|P82932|RT06_HUMAN	1	1	1	10.4	14.226							1	1													0	69.391	2	1
sp|P82933|RT09_HUMAN	1	6	6	23.5	45.834						1	2	4	1			1	1	1							0	41.345	9	1
sp|P82979|SARNP_HUMAN	1	3	3	18.6	23.671	1	1			1	1	1	1				1	1			1	1	1	1	1	0	23.614	35	1
sp|P83111|LACTB_HUMAN	1	1	1	2.7	60.693							1														0	4.6281	1	1
sp|P83436|COG7_HUMAN	1	5	5	7.4	86.343								1	1	1	1	1	2								0	8.2898	7	1
sp|P83731|RL24_HUMAN	1	4	4	19.1	17.779											2	1	1	1			1	1			0	11.561	16	1
sp|P84022|SMAD3_HUMAN;sp|Q15796|SMAD2_HUMAN;sp|O15198|SMAD9_HUMAN;sp|Q99717|SMAD5_HUMAN;sp|Q15797|SMAD1_HUMAN	5	2;2;2;1;1	2;2;2;1;1	5.6	48.08											1			2			1				0	5.7102	5	1
sp|P84077|ARF1_HUMAN;sp|P61204|ARF3_HUMAN	2	6;6	2;2	47	20.697					3	3	2	1					1								0	16.449	20	1
sp|P84085|ARF5_HUMAN	1	5	1	42.8	20.529							1														0.0036621	2.0549	1	1
sp|P84090|ERH_HUMAN	1	3	3	41.3	12.259	1	1	1	2	2	4	4	3						1	1	1	2	2	2	2	0	323.31	103	1
sp|P84095|RHOG_HUMAN	1	1	1	9.9	21.308					1	1															0	4.3927	3	1
sp|P84098|RL19_HUMAN	1	1	1	8.7	23.466							2	2													0	39.301	10	1
sp|P84103|SRSF3_HUMAN	1	2	1	14	19.329		1															1		1		0	3.2212	10	1
sp|P84157|MXRA7_HUMAN	1	1	1	14.2	21.466											1	1									0	28.518	4	1
sp|P84243|H33_HUMAN	1	2	1	32.4	15.328																		2		2	0	5.4451	8	1
sp|P85037|FOXK1_HUMAN	1	8	8	23.9	75.456							1	1	2	1	1	1		1			1				0	51.636	13	1
sp|P86791|CCZ1_HUMAN;sp|P86790|CCZ1B_HUMAN	2	2;2	2;2	4.6	55.866												1					1				0	3.3642	2	1
sp|P98155|VLDLR_HUMAN	1	2	2	3.2	96.098							1	1													0	4.3919	2	1
sp|P98170|XIAP_HUMAN	1	2	2	9.9	56.684								1					1								0	3.3294	2	1
sp|P98175|RBM10_HUMAN	1	5	5	14.6	103.53							2	1	1					1	1						0	13.006	8	1
sp|P98194|AT2C1_HUMAN	1	4	4	7	100.58							1	2	3			1									0	10.621	9	1
sp|P99999|CYC_HUMAN;CON__P62894	2	3;1	3;1	24.8	11.749	1	1			1	1			1	1	1	1	1	1			2		1		0	5.8903	24	1
sp|Q00059|TFAM_HUMAN	1	3	3	11	29.096							1		2												0	8.5065	5	1
sp|Q00169|PIPNA_HUMAN	1	1	1	8.5	31.806								2	1												0	11.769	4	1
sp|Q00325|MPCP_HUMAN	1	8	8	13.8	40.094	1											1	3	5			2	3	3	1	0	37.075	127	1
sp|Q00341|VIGLN_HUMAN	1	13	13	13.5	141.45	3				2	1	2	2	3		1	2	1				1	3	2	1	0	54.707	31	1
sp|Q00403|TF2B_HUMAN	1	2	2	11.4	34.833										1		1	1								0	9.4101	4	1
sp|Q00536|CDK16_HUMAN	1	1	1	2.2	55.715														1							0.00053677	3.0128	1	1
sp|Q00577|PURA_HUMAN	1	3	3	20.2	34.91												2	2	1							0	22.269	11	1
sp|Q00610|CLH1_HUMAN	1	44	33	34.9	191.61	7	13	7	5	10	14	25	22	9	11	13	16	11	5	9	5	6	4	5	5	0	323.31	446	1
sp|Q00613|HSF1_HUMAN	1	3	3	4	57.26									1		1										0	8.6402	3	1
sp|Q00653|NFKB2_HUMAN	1	8	8	14.2	96.748							1	1	1		1	1	1		4	2	1				0	30.805	39	1
sp|Q00688|FKBP3_HUMAN	1	2	2	10.3	25.177								2	1	1											0	6.0094	4	1
sp|Q00796|DHSO_HUMAN	1	7	7	31.7	38.324							1	2	1		1	1	1			1		1	1		0	33.24	19	1
sp|Q00839|HNRPU_HUMAN	1	9	9	14.3	90.583	3	2				1	4	3	1	2	2	3	1			3	3	2	4	2	0	314.46	103	1
sp|Q01081|U2AF1_HUMAN;sp|Q8WU68|U2AF4_HUMAN	2	5;3	5;3	23.3	27.872		1		1	1	2	2	3			1	1									0	39.052	33	1
sp|Q01082|SPTB2_HUMAN	1	66	62	39.1	274.61	8	6	4	8	24	27	37	39	29	12	7	7	5	7	10	5	7	7	2	2	0	323.31	484	1
sp|Q01085|TIAR_HUMAN	1	5	3	17.9	41.59											2	3		1				1			0	21.095	8	1
sp|Q01105|SET_HUMAN;sp|P0DME0|SETLP_HUMAN	2	6;3	6;3	26.9	33.488	2	1	1	1		1	4	3	1							2	2	1	2		0	87.687	82	1
sp|Q01130|SRSF2_HUMAN	1	2	2	14.9	25.476					2	2		1	1												0	15.007	6	1
sp|Q01167|FOXK2_HUMAN	1	3	3	7.4	69.061											1			1			1	1			0	8.7182	4	1
sp|Q01415|GALK2_HUMAN	1	2	2	5	50.378											1	1	1								0	4.0627	4	1
sp|Q01433|AMPD2_HUMAN	1	2	2	2.3	100.69							1		1												0.00053634	3.0058	3	1
sp|Q01459|DIAC_HUMAN	1	3	3	9.4	43.759						1	1			1		1									0	4.9626	4	1
sp|Q01469|FABP5_HUMAN;sp|A8MUU1|FB5L3_HUMAN	2	6;2	6;2	48.9	15.164	1						1		2	5	2	4	3	2							0	109.13	42	1
sp|Q01484|ANK2_HUMAN	1	6	3	2.1	433.71								1			1	1	1		1						0	5.7597	6	1
sp|Q01518|CAP1_HUMAN	1	10	10	21.3	51.901	4	4	1	2	4	8	2	4	4	1											0	101.03	79	1
sp|Q01628|IFM3_HUMAN;sp|P13164|IFM1_HUMAN;sp|Q01629|IFM2_HUMAN	3	2;1;1	2;1;1	30.8	14.632										3	3	3	5	1							0	17.849	66	1
sp|Q01650|LAT1_HUMAN;sp|Q9UM01|YLAT1_HUMAN	2	4;1	3;0	4.9	55.01	2	2	1	1	2	2	3	2													0	121.52	53	1
sp|Q01658|NC2B_HUMAN	1	2	2	15.3	19.443	1				1	1	1	1													0	7.9095	6	1
sp|Q01664|TFAP4_HUMAN	1	1	1	5.3	38.725									1												0.0017963	2.6087	1	1
sp|Q01780|EXOSX_HUMAN	1	3	3	4.3	100.83								1	1							1	1		1		0	8.2104	6	1
sp|Q01804|OTUD4_HUMAN	1	5	5	5.3	124.04							1			1		1									0	11.696	5	1
sp|Q01813|PFKAP_HUMAN	1	15	13	26.5	85.595	1	1				2	8	4	2		3	5	4	6		2	2		2	1	0	177.63	95	1
sp|Q01844|EWS_HUMAN	1	5	5	10.7	68.477							1	1	2	4	1	1		3	1						0	59.952	15	1
sp|Q01968|OCRL_HUMAN	1	3	3	4.3	104.2								1									2		1		0	3.8729	5	1
sp|Q01970|PLCB3_HUMAN	1	4	4	4.5	138.8								1	1									2	2		0	41.21	9	1
sp|Q01973|ROR1_HUMAN	1	1	1	1.3	104.28													1								0.0017944	2.6065	1	1
sp|Q01995|TAGL_HUMAN	1	2	2	10	22.611							1	1	1												0	3.3108	3	1
sp|Q02127|PYRD_HUMAN	1	4	4	13.7	42.867					1			1	1								2	1			0	11.853	8	1
sp|Q02218|ODO1_HUMAN;sp|Q9ULD0|OGDHL_HUMAN	2	14;3	14;3	19.9	115.93							2	1	3	3	1	2			2	2	3	3	2	1	0	79.841	54	1
sp|Q02241|KIF23_HUMAN	1	2	2	2.8	110.06									1							1					0	9.1077	2	1
sp|Q02252|MMSA_HUMAN	1	5	5	10.3	57.839					1			1				2				1	1	1	1		0	11.614	13	1
sp|Q02338|BDH_HUMAN	1	7	7	32.9	38.157							1	1	4		3	1	1	1			1				0	25.916	17	1
sp|Q02543|RL18A_HUMAN	1	3	3	19.3	20.762					1	1	2		2	2	2	1	2								0	36.31	23	1
sp|Q02750|MP2K1_HUMAN	1	4	2	17	43.439	1									1											0	4.2633	2	1
sp|Q02790|FKBP4_HUMAN	1	9	9	30.5	51.804					2	3	5	3		1	1	1	1	1	2	1					0	160.92	77	1
sp|Q02809|PLOD1_HUMAN	1	13	13	23.5	83.549	1	1	1	1	2	6	7	9	2	2				4	1	1	3	3	1		0	164.12	88	1
sp|Q02818|NUCB1_HUMAN	1	9	9	20.4	53.879	2				1	1	6	7	4	1											0	103.83	22	1
sp|Q02878|RL6_HUMAN	1	3	3	13.9	32.728																	3	6	1		0	14.63	28	1
sp|Q02880|TOP2B_HUMAN	1	7	4	4.8	183.26								1					1		1		1				0	8.1129	5	1
sp|Q02952|AKA12_HUMAN	1	1	1	1.6	191.48							1														0	3.5439	1	1
sp|Q02978|M2OM_HUMAN	1	9	9	32.5	34.061	1	1					1	1			2	1		2		1	4	4	3	2	0	141.14	54	1
sp|Q03001|DYST_HUMAN	1	31	31	5.2	860.65					2	2	4	7	5	1	3	7	3	2		1		2	1		0	79.711	45	1
sp|Q03135|CAV1_HUMAN	1	1	1	7.9	20.471		1									1	2									0	13.726	7	1
sp|Q03154|ACY1_HUMAN	1	5	5	15.2	45.884						1	1				1						1	1	2	1	0	16.274	10	1
sp|Q03169|TNAP2_HUMAN	1	7	7	13	72.66	1							2	2								1	1	2	1	0	34.742	14	1
sp|Q03252|LMNB2_HUMAN	1	14	14	28.7	67.688	2	2	1	1	4	5	5	7	3	2	2	6	3	2		1					0	226.58	80	1
sp|Q03405|UPAR_HUMAN	1	1	1	4.8	36.978								1													0	4.8536	1	1
sp|Q03426|KIME_HUMAN	1	2	2	9.6	42.45										1	1		1								0.0057348	1.8002	3	1
sp|Q03518|TAP1_HUMAN	1	1	1	3.7	87.217									1												0	30.371	1	1
sp|Q04206|TF65_HUMAN	1	4	4	7.4	60.218										1		2			1	1			1	1	0	9.4407	11	1
sp|Q04323|UBXN1_HUMAN	1	3	3	20.9	33.325						1	1	1		1	1		1	1							0	11.217	10	1
sp|Q04446|GLGB_HUMAN	1	1	1	2	80.473												1	1								0.0017843	2.5417	2	1
sp|Q04637|IF4G1_HUMAN	1	25	22	21	175.49	9	6	1	2	3	6	5	5	9	2	6	8	7	5		1	6	4	4	3	0	323.31	282	1
sp|Q04721|NOTC2_HUMAN	1	9	9	7.2	265.4											2	2	1	5	2		2	2	1		0	18.303	22	1
sp|Q04724|TLE1_HUMAN;sp|Q04727|TLE4_HUMAN;sp|Q04725|TLE2_HUMAN	3	4;2;1	3;1;0	8.7	83.2									2		1	1		1	1						0	8.8861	6	1
sp|Q04726|TLE3_HUMAN	1	2	1	4.1	83.416														1							0.0041063	1.9445	2	1
sp|Q04760|LGUL_HUMAN	1	5	5	19.6	20.777		1											3	2	1	1	2	2	2	1	0	41.849	48	1
sp|Q04837|SSBP_HUMAN	1	3	3	22.3	17.259								1				1									0	13.843	7	1
sp|Q04912|RON_HUMAN	1	5	5	4.5	152.27						1	2	1	1		1		2	1							0	22.369	9	1
sp|Q04917|1433F_HUMAN	1	6	4	34.6	28.218	1			1	4	4	5														0	147.73	22	1
sp|Q05048|CSTF1_HUMAN	1	5	5	16.7	48.357	1						3	1			2	1				1	1	1	1	1	0	18.464	16	1
sp|Q05086|UBE3A_HUMAN	1	6	6	8.9	100.69							3	1		1		2	1								0	17.28	7	1
sp|Q05193|DYN1_HUMAN	1	7	4	7.2	97.407					2	2	1	1	2		1	1									0	21.008	14	1
sp|Q05209|PTN12_HUMAN	1	5	5	11.8	88.105							1	2				2	1								0	19.409	6	1
sp|Q05397|FAK1_HUMAN	1	6	6	8.7	119.23						1		2	2	1			1								0	20.759	8	1
sp|Q05519|SRS11_HUMAN	1	3	3	8.1	53.542	1				1	1	2	2								1	2		1	1	0	11.855	30	1
sp|Q05639|EF1A2_HUMAN	1	13	5	51.6	50.47									3		1	3	1	1	1						0	58.942	18	1
sp|Q05682|CALD1_HUMAN	1	3	3	8.1	93.23							4														0	23.497	4	1
sp|Q05707|COEA1_HUMAN	1	2	2	1.8	193.51						1	1														0	6.0251	3	1
sp|Q05D32|CTSL2_HUMAN	1	4	4	5.8	52.998							1					1	2								0	6.7454	4	1
sp|Q06124|PTN11_HUMAN	1	3	3	7.4	68.436									1			2									0	10.494	3	1
sp|Q06203|PUR1_HUMAN	1	5	5	11.2	57.398							1	5		1											0	22.312	7	1
sp|Q06210|GFPT1_HUMAN;sp|O94808|GFPT2_HUMAN	2	13;1	13;1	19.7	78.806		2			2	4	4	4	2	1		1	1	2	3		2	2	2	1	0	130.53	56	1
sp|Q06265|EXOS9_HUMAN	1	3	3	10.5	48.948								2				1	1	1							0	14.652	7	1
sp|Q06323|PSME1_HUMAN	1	11	11	33.7	28.723	2	1			1		4	4	4		1	2	1		3						0	152.41	58	1
sp|Q06481|APLP2_HUMAN	1	6	6	11.1	86.955					1	1	3	3	1	1											0	16.144	11	1
sp|Q06546|GABPA_HUMAN	1	3	3	11.5	51.295						1	1					1									0	16.946	3	1
sp|Q06587|RING1_HUMAN;sp|Q99496|RING2_HUMAN	2	2;1	2;1	3.4	42.429										1	1		1								0	4.54	6	1
sp|Q06787|FMR1_HUMAN	1	8	7	16.3	71.174					2	1	3	1	2	1	1	1	1	1							0	18.187	16	1
sp|Q06830|PRDX1_HUMAN	1	10	8	46.7	22.11	4	4	8	2	3	3	3	3	3	2	4	5	6	4	4	3	3	1	1		0	323.31	260	1
sp|Q07020|RL18_HUMAN	1	4	4	13.8	21.634	1	2				1	2	3	1												0	88.127	16	1
sp|Q07021|C1QBP_HUMAN	1	5	5	31.2	31.362	2	3	2	3	3	4	3	7	3		1		1								0	154.88	78	1
sp|Q07065|CKAP4_HUMAN	1	19	19	28.9	66.022	8	10	2	2	7	10	7	9	5	3	4	6	4	2							0	323.31	160	1
sp|Q07157|ZO1_HUMAN	1	19	19	16.2	195.46	1				2	1	2	3	5	2	5	3	5	3	2				1		0	99.547	58	1
sp|Q07666|KHDR1_HUMAN;sp|Q5VWX1|KHDR2_HUMAN	2	4;1	3;0	18.7	48.227		1					1	1	2	1											0	7.2902	8	1
sp|Q07812|BAX_HUMAN	1	1	1	6.8	21.184												1									0	3.1476	1	1
sp|Q07866|KLC1_HUMAN	1	8	5	15.7	65.309					1	1	4	1				2	1	1	1	2	2	1	2	1	0	52.875	33	1
sp|Q07954|LRP1_HUMAN	1	7	7	2.4	504.6												1	1	4	1		1		1		0	21.93	9	1
sp|Q07955|SRSF1_HUMAN	1	5	4	18.1	27.744			1	1	2	2	1			3	2	3	8	2							0	51.71	47	1
sp|Q07960|RHG01_HUMAN	1	4	4	14.4	50.435							2	1	1									1	1		0	25.493	10	1
sp|Q08174|PCDH1_HUMAN	1	5	5	5.2	114.74						1		1	1	2			1	1							0	15.106	9	1
sp|Q08209|PP2BA_HUMAN;sp|P16298|PP2BB_HUMAN	2	3;1	3;1	5.2	58.687	1									1		1	1				1	1	1	1	0	15.967	18	1
sp|Q08211|DHX9_HUMAN	1	21	21	21.2	140.96		1			2	2	4	6	4	1	2	3	3	4	3	3	10	4	2	2	0	162.07	107	1
sp|Q08378|GOGA3_HUMAN	1	12	12	11.1	167.35					1	1	1	3	1		1	4	2	1							0	44.385	17	1
sp|Q08379|GOGA2_HUMAN	1	8	8	12.1	113.08						1				3	1	3									0	22.45	9	1
sp|Q08380|LG3BP_HUMAN	1	9	9	25.6	65.33	4	3	1	2	4	4	5	8	1	1	1	1	2	3		1	2	1	1	1	0	117.35	88	1
sp|Q08426|ECHP_HUMAN	1	7	7	16.2	79.494									1				1	2			1	2			0	11.771	8	1
sp|Q08431|MFGM_HUMAN	1	5	5	19.1	43.122									1		1	1		1		1	1				0	17.381	5	1
sp|Q08722|CD47_HUMAN	1	2	2	2.5	35.213	1	1									1	1		1							0	4.577	10	1
sp|Q08752|PPID_HUMAN	1	4	4	12.2	40.763									1					1				2			0	24.491	6	1
sp|Q08945|SSRP1_HUMAN	1	13	13	26.9	81.074		2		1	4	5	7	6		1	2	1	2	1			1	2	1		0	111.9	67	1
sp|Q08AF3|SLFN5_HUMAN	1	3	3	5.2	101.05														1	1			1	1	1	0	8.8838	4	1
sp|Q08AG7|MZT1_HUMAN	1	1	1	19.5	8.4787									2												0.0024931	2.2758	2	1
sp|Q08AM6|VAC14_HUMAN	1	5	5	9.3	87.972								1				1	1		1		1	1		1	0	14.976	9	1
sp|Q08J23|NSUN2_HUMAN	1	17	17	31.4	86.47	1	1			1	3	5	5	1		1	3		2	2			1			0	79.111	43	1
sp|Q09028|RBBP4_HUMAN	1	6	2	14.6	47.655	1			1	2	4	2	1	1	1	2	3	2	1		1	3	2	1		0	101.42	60	1
sp|Q09161|NCBP1_HUMAN	1	4	4	8.4	91.838								1	1		1			2							0	14.623	7	1
sp|Q09328|MGT5A_HUMAN	1	4	4	8.5	84.542									1	1	1	1									0	5.292	4	1
sp|Q09472|EP300_HUMAN;sp|Q92793|CBP_HUMAN	2	5;2	5;2	4.3	264.16					1		4				1		2				1	1			0	27.219	10	1
sp|Q09666|AHNK_HUMAN	1	182	182	53.4	629.09	63	60	44	56	86	114	133	90	53	22	20	26	14	14	9	3	3	4	3	2	0	323.31	1886	1
sp|Q0VDF9|HSP7E_HUMAN	1	4	4	11.6	54.794											1	2	1				1	1		1	0	12.285	8	1
sp|Q0VGL1|LTOR4_HUMAN	1	1	1	10.1	10.741	1	1		1		1	1														0	26.725	3	1
sp|Q10469|MGAT2_HUMAN	1	3	3	9.6	51.55									1	1						1		1	1		0	10.065	7	1
sp|Q10471|GALT2_HUMAN	1	7	7	18	64.732						1	1	1	1	1		1	1			1	1	1			0	27.749	16	1
sp|Q10472|GALT1_HUMAN	1	2	2	5	64.218																1			1		0	4.4561	3	1
sp|Q10567|AP1B1_HUMAN	1	22	12	27	104.64						2	4	3	2	3	1	4						2		1	0	58.309	42	1
sp|Q10570|CPSF1_HUMAN	1	10	10	8.7	160.88							1	2		1		2	1	2		1	4	1	1		0	46.498	20	1
sp|Q10713|MPPA_HUMAN	1	7	7	17	58.252								3				3		1	2		1	2			0	30.599	27	1
sp|Q12765|SCRN1_HUMAN	1	4	4	11.6	46.382						2		1						1	1						0	16.973	20	1
sp|Q12768|STRUM_HUMAN	1	3	3	3.2	134.28								1				1					1				0	9.0009	4	1
sp|Q12769|NU160_HUMAN	1	7	7	7.8	162.12								1	1				2				3	2	1	1	0	16.891	11	1
sp|Q12788|TBL3_HUMAN	1	13	13	28.2	89.034	1					1	2	1	1		3	3	4	2	2	2					0	113.11	35	1
sp|Q12789|TF3C1_HUMAN	1	2	2	1.6	238.87										1		1									0.00053576	2.9984	2	1
sp|Q12792|TWF1_HUMAN	1	3	3	9.1	40.282								1	2							1	2	1			0	33.722	17	1
sp|Q12797|ASPH_HUMAN	1	12	12	21.5	85.862	2	5	1	2	3	4	8	8	3	4	3	3	2	3		1	2		1		0	119.94	107	1
sp|Q12800|TFCP2_HUMAN	1	3	3	8.6	57.255						1							1				1	2	1		0	11.46	8	1
sp|Q12824|SNF5_HUMAN	1	5	5	23.1	44.141					1	1	1	1				1	1	2	2						0	28.415	10	1
sp|Q12830|BPTF_HUMAN	1	3	3	1.2	338.26								1	1				1					1			0	13.956	5	1
sp|Q12846|STX4_HUMAN	1	5	5	24.6	34.18							1	2	1	1				1							0	60.194	7	1
sp|Q12849|GRSF1_HUMAN	1	6	6	14.4	53.126							3	2		1	1	1	1	1							0	22.683	8	1
sp|Q12874|SF3A3_HUMAN	1	13	13	30.1	58.848	1	2		1	1	7	5	3	2	1	3	1	2			1	2	1	1	1	0	258.05	71	1
sp|Q12888|TP53B_HUMAN	1	16	16	12	213.57						4	3	2	3	1	1	1									0	69.071	19	1
sp|Q12894|IFRD2_HUMAN	1	1	1	3.4	54.813									1												0	4.923	1	1
sp|Q12904|AIMP1_HUMAN	1	9	9	43.3	34.352	2	1			2	1	2	4	4					3	1						0	168.42	31	1
sp|Q12905|ILF2_HUMAN	1	13	13	47.7	43.062	4	3		2	3	3	7	3	3	2	3	3	2	1	1	2	4	4	9	2	0	284.75	185	1
sp|Q12906|ILF3_HUMAN	1	10	10	12.4	95.337	2	1			1	1	3	6			1	1	1	1	1						0	43.327	24	1
sp|Q12907|LMAN2_HUMAN	1	5	5	16.3	40.228	1						1	1	2					1	2						0	21.699	22	1
sp|Q12913|PTPRJ_HUMAN	1	8	8	8.8	145.94								1	1		1	1	1	2	1				1	1	0	22.415	23	1
sp|Q12929|EPS8_HUMAN	1	7	7	13.3	91.88						2	2			1	2	1	1	2							0	30.551	25	1
sp|Q12931|TRAP1_HUMAN	1	16	16	31.7	80.109	4	5	4	1	3	3	6	9	9	1	2	4	3	1		2	2	2			0	227.51	100	1
sp|Q12933|TRAF2_HUMAN	1	3	3	8	55.859										1	1	1	1					1	1		0	17.06	5	1
sp|Q12959|DLG1_HUMAN;sp|Q15700|DLG2_HUMAN;sp|P78352|DLG4_HUMAN	3	13;2;1	13;2;1	22.6	100.45	2	5				3	2	3	5	1	2	2	1	2	2						0	82.879	58	1
sp|Q12962|TAF10_HUMAN	1	2	2	15.6	21.711								2			1										0	4.3038	3	1
sp|Q12972|PP1R8_HUMAN	1	2	2	11.1	38.478										1					2						0	7.3846	4	1
sp|Q12974|TP4A2_HUMAN;sp|Q93096|TP4A1_HUMAN	2	1;1	1;1	8.4	19.127																	1	1			0	3.6456	4	1
sp|Q12981|SEC20_HUMAN	1	2	2	13.2	26.132						1		1	1												0.0061626	1.7148	4	1
sp|Q12996|CSTF3_HUMAN	1	9	9	18.7	82.921	1	1	1	1	2	2	2	2	1			4	3	1			1				0	34.557	30	1
sp|Q13011|ECH1_HUMAN	1	9	9	50.3	35.816	4	5	4	3	3	3	8	10	8	1	3	4	5	4							0	323.31	123	1
sp|Q13017|RHG05_HUMAN	1	2	2	1.8	172.46									1				2								0	3.3278	3	1
sp|Q13033|STRN3_HUMAN	1	3	3	6.4	87.208									1			1		2							0	15.237	17	1
sp|Q13043|STK4_HUMAN	1	3	1	9.2	55.63											1										0.0036541	2.0331	2	1
sp|Q13045|FLII_HUMAN	1	13	13	14.8	144.75						1	3	2	1		2		4	4		1	2	1	2	1	0	72.437	40	1
sp|Q13049|TRI32_HUMAN	1	3	3	6.4	71.988									1	1	1										0	9.3224	3	1
sp|Q13057|COASY_HUMAN	1	6	6	17.7	62.328									1	1	1	1				1	1				0	12.503	14	1
sp|Q13084|RM28_HUMAN	1	3	3	17.6	30.156							1	1	4	5											0	28.791	23	1
sp|Q13085|ACACA_HUMAN	1	33	28	19.9	265.55	2	2				5	3	7	9	2	5	3	3	8	1		4	2	2	2	0	117.83	95	1
sp|Q13098|CSN1_HUMAN	1	4	4	13.4	55.536	1				1	1	1								2	2					0	17.781	13	1
sp|Q13123|RED_HUMAN	1	2	2	1.6	65.601														1							0.0017903	2.5748	2	1
sp|Q13131|AAPK1_HUMAN;sp|P54646|AAPK2_HUMAN	2	4;1	4;1	9.1	64.009											1	2	1		1						0	12.52	6	1
sp|Q13136|LIPA1_HUMAN;sp|O75335|LIPA4_HUMAN;sp|O75334|LIPA2_HUMAN	3	6;1;1	6;1;1	7.1	135.78									2			1		2		1					0	13.32	7	1
sp|Q13137|CACO2_HUMAN	1	1	1	2.9	52.253									1												0.0012984	2.7185	1	1
sp|Q13144|EI2BE_HUMAN	1	4	4	10.3	80.379								1			2	4	1	1							0	37.753	14	1
sp|Q13148|TADBP_HUMAN	1	4	4	27.3	44.739					1	2		1		1	2	3				1	2	2	2	2	0	54.206	38	1
sp|Q13151|ROA0_HUMAN	1	3	3	11.8	30.84								1			1	1	2								0	27.702	7	1
sp|Q13155|AIMP2_HUMAN	1	5	5	34.7	35.348						1	2			3	1		1		1						0	45.79	14	1
sp|Q13158|FADD_HUMAN	1	2	2	6.2	23.279															1						0.0088065	1.4985	3	1
sp|Q13162|PRDX4_HUMAN	1	7	6	32.5	30.54	1						1	1	1	2	3	2	1		2						0	34.029	22	1
sp|Q13177|PAK2_HUMAN;sp|O75914|PAK3_HUMAN	2	16;5	13;3	43.9	58.042	3	2			3	5	3	5	6	3	2	5	3	3	2				1		0	158.42	91	1
sp|Q13185|CBX3_HUMAN	1	7	6	39.3	20.811	1				3	3	4	7	3		1										0	85.192	54	1
sp|Q13188|STK3_HUMAN	1	8	6	20.6	56.3					1	1	3	5	2									1	2	1	0	26.668	25	1
sp|Q13190|STX5_HUMAN	1	3	3	16.6	39.672				1								1			1	2					0	31.262	19	1
sp|Q13200|PSMD2_HUMAN	1	17	17	22.9	100.2	3	1				2	4	2	5	3	6	6	5	3	1	2	2	4	3	3	0	173.28	149	1
sp|Q13217|DNJC3_HUMAN	1	4	4	13.1	57.579	1						1	2	3												0	26.618	7	1
sp|Q13228|SBP1_HUMAN	1	7	7	18.4	52.39							2	1			1		1	1			1	1	1		0	7.4825	8	1
sp|Q13232|NDK3_HUMAN	1	1	1	10.1	19.015														1							0.00079893	2.9407	0	1
sp|Q13242|SRSF9_HUMAN	1	6	5	23.1	25.542		1					3	1	1	1	2	1									0	10.933	13	1
sp|Q13243|SRSF5_HUMAN	1	2	1	8.8	31.263								1													0	5.3021	2	1
sp|Q13247|SRSF6_HUMAN;sp|Q08170|SRSF4_HUMAN	2	3;2	2;1	2.6	39.586												1	1								0	8.1235	6	1
sp|Q13263|TIF1B_HUMAN	1	20	20	48.4	88.549	2	4	2	3	5	5	9	12	8	4	3			2			2	6	4	2	0	323.31	187	1
sp|Q13268|DHRS2_HUMAN	1	6	6	37.1	29.926	1	1				1	1					1	1		2	1	3	3	3	3	0	152.1	70	1
sp|Q13277|STX3_HUMAN	1	2	2	9.3	33.155							1	1				1	1								0	8.1826	3	1
sp|Q13283|G3BP1_HUMAN	1	12	11	33.5	52.164	1	2			1	1	4	4			3	3	3	3	3	4	2	3	5	3	0	181.01	154	1
sp|Q13287|NMI_HUMAN	1	5	5	21.8	35.056							1		1	1		1		1	1						0	9.5286	7	1
sp|Q13310|PABP4_HUMAN	1	11	6	24.7	70.782	2	2						1		1	1	1	1	1		1	3	2	1	1	0	26.865	47	1
sp|Q13315|ATM_HUMAN	1	2	2	0.9	350.68							1						1								0	3.7226	3	1
sp|Q13330|MTA1_HUMAN	1	1	1	1.7	80.785							1	1													0.0015472	2.6561	2	1
sp|Q13347|EIF3I_HUMAN	1	5	5	21.5	36.501	1					1	1	1	1	2	1	1	1		2	1					0	64.584	29	1
sp|Q13363|CTBP1_HUMAN	1	6	5	16.1	47.535	2			1	2	2	1	2	1	2				1							0	168.67	21	1
sp|Q13404|UB2V1_HUMAN	1	4	2	23.8	16.495		1						1				1	3								0	17	13	1
sp|Q13405|RM49_HUMAN	1	3	3	23.5	19.198	1	1	1	1	1	2				1	1	1	1								0	50.993	31	1
sp|Q13409|DC1I2_HUMAN	1	6	6	14.3	71.456							1	1			2	2	2								0	72.814	9	1
sp|Q13416|ORC2_HUMAN	1	1	1	2.1	65.971								1													0.00079915	2.9444	1	1
sp|Q13418|ILK_HUMAN	1	2	2	7.5	51.419												2						1			0	4.408	5	1
sp|Q13423|NNTM_HUMAN	1	13	13	19.1	113.89	2					1	1	1		1	7	7	3	3	3		2	3	2	2	0	89.287	72	1
sp|Q13425|SNTB2_HUMAN;sp|Q13424|SNTA1_HUMAN	2	3;1	2;0	5.6	57.949															2						0	5.6114	8	1
sp|Q13428|TCOF_HUMAN	1	6	6	4.6	152.1	1	1			1				1	2	2	1	2	1		1	1	1			0	25.529	28	1
sp|Q13435|SF3B2_HUMAN	1	17	17	24.9	100.23	1					3	4	7	7	5	1			1	1	1		1	1	2	0	157.62	72	1
sp|Q13438|OS9_HUMAN	1	3	3	8.2	75.561								2							1						0.0018009	2.6311	3	1
sp|Q13439|GOGA4_HUMAN	1	12	12	5.4	261.14							2	4	3	2	1	1	1								0	31.71	16	1
sp|Q13442|HAP28_HUMAN	1	2	2	8.8	20.63						1	1	2													0	25.394	3	1
sp|Q13443|ADAM9_HUMAN	1	2	2	5.7	90.555									1					1							0	6.5065	7	1
sp|Q13445|TMED1_HUMAN	1	2	2	9.7	25.206									1								1				0	6.4911	5	1
sp|Q13451|FKBP5_HUMAN	1	3	3	10.9	51.212						1	1				1										0	10.244	3	1
sp|Q13459|MYO9B_HUMAN	1	2	2	1.3	243.4									1				1								0.0012974	2.7117	4	1
sp|Q13464|ROCK1_HUMAN	1	5	2	3.5	158.17									1					1							0.0015508	2.68	2	1
sp|Q13488|VPP3_HUMAN	1	3	3	5.8	92.967							1	1	1					1	1						0	6.324	9	1
sp|Q13492|PICAL_HUMAN	1	9	7	26.5	70.754	1			1	1	1	2		2	1	3	3				1	3	2	2	2	0	81.729	55	1
sp|Q13501|SQSTM_HUMAN	1	10	10	52.3	47.687					1	6	3	4	3	3			1	2	1						0	176.78	43	1
sp|Q13503|MED21_HUMAN	1	2	2	27.1	15.564						1	1						1								0	5.9152	4	1
sp|Q13505|MTX1_HUMAN	1	2	2	3.4	51.476																	2	2	1	2	0	12.487	15	1
sp|Q13509|TBB3_HUMAN	1	12	2	37.1	50.432						1	2	1					1		2	1	1	1	1		0	29.338	33	1
sp|Q13510|ASAH1_HUMAN	1	2	2	7.1	44.659							1	1	1												0	6.4397	3	1
sp|Q13523|PRP4B_HUMAN	1	3	3	4.3	116.99							1								1		1				0	4.0139	2	1
sp|Q13526|PIN1_HUMAN;sp|O15428|PINL_HUMAN	2	3;1	3;1	25.8	18.243							1	1		1			1	1							0	8.6672	5	1
sp|Q13541|4EBP1_HUMAN	1	1	1	10.2	12.58					1		1														0.0075029	1.5981	2	1
sp|Q13546|RIPK1_HUMAN	1	1	1	1.9	75.93						1	1														0.0096044	1.3714	2	1
sp|Q13547|HDAC1_HUMAN	1	9	7	28.2	55.102		1				1	3	2	1		1	1		1			2	2	1		0	160.52	22	1
sp|Q13555|KCC2G_HUMAN	1	6	3	18.6	62.608							1	1		1		1				1					0	7.2631	4	1
sp|Q13557|KCC2D_HUMAN;sp|Q9UQM7|KCC2A_HUMAN	2	6;3	3;0	19.8	56.369						3	1	2		1	1	1	1						1		0	27.931	14	1
sp|Q13561|DCTN2_HUMAN	1	11	11	42.4	44.23	4				4	2	7	3		3	1	3	3								0	87.466	39	1
sp|Q13564|ULA1_HUMAN	1	2	2	7.1	60.246								2													0	9.6199	2	1
sp|Q13573|SNW1_HUMAN	1	4	4	11.9	61.494						1	2	2													0	17.819	4	1
sp|Q13586|STIM1_HUMAN	1	5	5	6.9	77.422									1		1	3	1	1							0	16.47	12	1
sp|Q13595|TRA2A_HUMAN	1	2	2	12.4	32.688									1			1									0.0091996	1.4237	1	1
sp|Q13596|SNX1_HUMAN	1	8	6	16.7	59.069								1	1		1	1	1	1				3	2	3	0	33.505	29	1
sp|Q13601|KRR1_HUMAN	1	5	5	19.2	43.664							1	2	1	1	1										0	12.046	6	1
sp|Q13608|PEX6_HUMAN	1	1	1	1.9	104.06															1						0.001298	2.7138	2	1
sp|Q13617|CUL2_HUMAN	1	1	1	1.2	86.982																		1			0.0043353	1.9055	1	1
sp|Q13618|CUL3_HUMAN	1	7	7	11.7	88.929									1		1	2	1	2			2	2	1		0	25.611	14	1
sp|Q13619|CUL4A_HUMAN	1	4	1	6.5	87.679								1													0.0070771	1.6482	0	1
sp|Q13620|CUL4B_HUMAN	1	9	6	11.6	103.98					1	1	1				1	1	1	3	1		1	1			0	20.669	14	1
sp|Q13625|ASPP2_HUMAN	1	4	3	5.6	125.61							1	1								2	1			1	0	14.729	9	1
sp|Q13636|RAB31_HUMAN	1	1	1	7.2	21.569									2												0	4.1688	3	1
sp|Q13641|TPBG_HUMAN	1	2	2	7.6	46.031															1	2					0	11.37	4	1
sp|Q13642|FHL1_HUMAN	1	4	4	20.1	36.263							1	1			1	1		1			1	1	1	1	0	24.006	30	1
sp|Q13643|FHL3_HUMAN	1	2	2	7.1	31.192													1								0.0079569	1.5768	0	1
sp|Q13671|RIN1_HUMAN	1	5	5	10.3	84.098										1		2	1	1				2	1		0	10.839	14	1
sp|Q13685|AAMP_HUMAN	1	3	3	16.1	46.75								1	1	1											0	9.1425	5	1
sp|Q13724|MOGS_HUMAN	1	9	9	14.2	91.916						1	1	2	2	2	3	4	1	2			1	2	3	1	0	94.66	46	1
sp|Q13740|CD166_HUMAN	1	9	9	25.7	65.102	1	1		1	1	3	3	2	5	2	2	1	3	2	1						0	104.59	45	1
sp|Q13769|THOC5_HUMAN	1	4	4	7.3	78.507									1		1				1						0	18.437	5	1
sp|Q13795|ARFRP_HUMAN	1	2	2	8	22.614													1								0	6.3564	2	1
sp|Q13813|SPTN1_HUMAN	1	87	87	39	284.54	15	14	7	9	20	31	35	36	12	10	15	8	4	8	2	1	3	2	5	1	0	323.31	503	1
sp|Q13825|AUHM_HUMAN	1	1	1	3.2	35.608													1								0	4.8618	1	1
sp|Q13838|DX39B_HUMAN	1	10	4	26.4	48.991	1	1	1	1	1	1	3	1			1	3	2	2			3	3	1	1	0	123.66	71	1
sp|Q13867|BLMH_HUMAN	1	6	6	15.6	52.562			1		1		1		1		1	3	1	1			1				0	12.21	17	1
sp|Q13868|EXOS2_HUMAN	1	2	2	11.6	32.789							1										1	2	2	1	0	8.8838	9	1
sp|Q13873|BMPR2_HUMAN	1	1	1	1.8	115.2									1												0	9.0969	1	1
sp|Q13884|SNTB1_HUMAN	1	5	4	13	58.06							1	1				1							1	1	0	16.136	6	1
sp|Q13895|BYST_HUMAN	1	7	7	19	49.601					2			1	1		1			2			1				0	11.7	11	1
sp|Q13938|CAYP1_HUMAN	1	1	1	6.9	20.967							1														0.0017976	2.6195	1	1
sp|Q13948|CASP_HUMAN;sp|O14529|CUX2_HUMAN	2	7;1	2;1	14	77.454	1				1	3	3	4					1	1	2		1	1			0	59.851	26	1
sp|Q14004|CDK13_HUMAN	1	1	1	0.8	164.92										1											0.0034508	2.1443	1	1
sp|Q14008|CKAP5_HUMAN	1	20	20	13	225.49		1			1	6	6	5	5	1	2	3	1	2		1	1				0	84.286	45	1
sp|Q14011|CIRBP_HUMAN	1	2	2	18.6	18.648								1			1	1									0.0012947	2.6913	5	1
sp|Q14019|COTL1_HUMAN	1	3	3	27.5	15.945	1				2		3	3													0	52.15	14	1
sp|Q14103|HNRPD_HUMAN	1	4	4	14.4	38.434	1	1	3	3	3	4	3	2	1		1							1	1	1	0	154.96	83	1
sp|Q14108|SCRB2_HUMAN	1	5	5	9	54.29	1				3	2	2	2	1			1									0	34.96	19	1
sp|Q14116|IL18_HUMAN	1	1	1	4.1	22.326											1	1									0.0087861	1.4842	2	1
sp|Q14118|DAG1_HUMAN	1	4	4	6.6	97.44							1	1	1		1			1			1				0	7.2613	7	1
sp|Q14126|DSG2_HUMAN	1	16	16	26.9	122.29		1			1	1	4	4	3	2	3	5	4	5						1	0	94.093	49	1
sp|Q14137|BOP1_HUMAN	1	6	6	13.4	83.629					1	1	1	1			3	2	2	1							0	16.736	14	1
sp|Q14139|UBE4A_HUMAN	1	9	9	11.1	122.56										1	1	4	3	1	1		2	1	1		0	29.989	24	1
sp|Q14141|SEPT6_HUMAN	1	7	5	30.2	49.716					1	1	2	2	2	1	3	4	3								0	87.101	32	1
sp|Q14149|MORC3_HUMAN	1	1	1	2.1	107.11							1														0.0088249	1.5128	1	1
sp|Q14151|SAFB2_HUMAN	1	8	3	13.5	107.47							1	1	1	1						5				1	0	14.234	18	1
sp|Q14152|EIF3A_HUMAN	1	12	12	12	166.57								1	4	4	2	5	2		1	1	1	2	3	2	0	45.796	49	1
sp|Q14155|ARHG7_HUMAN;sp|Q15052|ARHG6_HUMAN	2	6;2	6;2	11.3	90.011								1	1				1	1	1		1	1			0	13.487	7	1
sp|Q14156|EFR3A_HUMAN	1	2	2	2.4	92.923							1	1										1	1		0	3.3993	4	1
sp|Q14157|UBP2L_HUMAN	1	13	13	22.5	114.53	1			1	1	1	3	2	1	2	2	5	4	3			1	1	1	2	0	253.87	68	1
sp|Q14160|SCRIB_HUMAN	1	16	14	14	174.88	2	2			2	2	1	1	1	2	3	4		1			2	1	1		0	59.606	42	1
sp|Q14161|GIT2_HUMAN	1	5	4	13.2	84.542							1					2			1		1				0	19.592	7	1
sp|Q14165|MLEC_HUMAN	1	6	6	24.7	32.233	1	2			1	2	2	1	1	1		1	3	3							0	27.363	26	1
sp|Q14166|TTL12_HUMAN	1	4	4	6.4	74.403							1						1		1						0	21.023	9	1
sp|Q14168|MPP2_HUMAN	1	2	1	4.2	64.58															1						0.0045684	1.8791	1	1
sp|Q14181|DPOA2_HUMAN	1	1	1	2	65.947													1								0.0093994	1.3977	1	1
[truncated: 2,308 more rows]

## Sheet: Protein IDs OVCAR-5 unfrac.
Protein IDs	Number of proteinsa	Number of peptides identified	Number of unique peptides	Sequence coverage [%]	Mol. weight [kDa]	Q-value	Scoreb	MS/MS Count	Protein Evidence Level according to neXtProt 2016-02
sp|A0AV96|RBM47_HUMAN	1	4	4	6.1	64.098	0	25.873	10	1
sp|A4D1E9|GTPBA_HUMAN	1	5	5	2.8	42.932	0	5.9476	11	1
sp|A5YKK6|CNOT1_HUMAN	1	20	20	1	266.94	0	47.852	29	1
sp|A6NJ78|MET15_HUMAN;sp|P0C7V9|ME15P_HUMAN	2	4;1	4;1	7.1	46.121	0	5.3477	4	1
sp|A6NKT7|RGPD3_HUMAN;sp|Q7Z3J3|RGPD4_HUMAN	2	8;7	1;1	0.7	197.48	0	3.1295	8	1
sp|E9PAV3|NACAM_HUMAN;sp|Q13765|NACA_HUMAN	2	6;5	6;5	2.7	205.42	0	195.83	84	1
sp|O00115|DNS2A_HUMAN	1	2	2	3.3	39.58	0	10.303	11	1
sp|O00116|ADAS_HUMAN	1	12	12	17.9	72.911	0	180.46	102	1
sp|O00148|DX39A_HUMAN	1	8	1	17.3	49.129	0	15.317	4	1
sp|O00151|PDLI1_HUMAN	1	13	13	35	36.071	0	150.37	57	1
sp|O00154|BACH_HUMAN	1	7	7	3.2	41.796	0	24.841	43	1
sp|O00159|MYO1C_HUMAN	1	13	13	2.4	121.68	0	71.057	32	1
sp|O00161|SNP23_HUMAN	1	7	7	21.3	23.354	0	74.642	21	1
sp|O00170|AIP_HUMAN	1	5	5	8.2	37.636	0	19.221	10	1
sp|O00193|SMAP_HUMAN	1	2	2	8.7	20.332	0	15.139	7	1
sp|O00203|AP3B1_HUMAN;sp|Q13367|AP3B2_HUMAN	2	12;1	12;1	3.4	121.32	0	45.651	49	1
sp|O00217|NDUS8_HUMAN	1	3	3	19.5	23.705	0	26.892	11	1
sp|O00231|PSD11_HUMAN	1	15	15	27.3	47.463	0	220.76	119	1
sp|O00232|PSD12_HUMAN	1	13	13	25.7	52.904	0	314.65	85	1
sp|O00233|PSMD9_HUMAN	1	2	2	5.4	24.682	0	22.896	14	1
sp|O00264|PGRC1_HUMAN	1	4	4	17.4	21.671	0	54.699	79	1
sp|O00267|SPT5H_HUMAN	1	13	13	2.9	121	0	102.26	29	1
sp|O00273|DFFA_HUMAN	1	6	6	6.3	36.521	0	37.942	16	1
sp|O00299|CLIC1_HUMAN	1	10	10	47.3	26.922	0	309.37	117	1
sp|O00303|EIF3F_HUMAN	1	7	7	12	37.563	0	89.184	112	1
sp|O00330|ODPX_HUMAN	1	4	4	8.8	54.122	0	19.987	20	1
sp|O00401|WASL_HUMAN	1	2	2	4.6	54.826	0	23.713	6	1
sp|O00410|IPO5_HUMAN	1	26	24	20.8	123.63	0	323.31	170	1
sp|O00423|EMAL1_HUMAN	1	1	1	2.1	89.86	0.0052707	1.8274	2	1
sp|O00425|IF2B3_HUMAN	1	9	8	5	63.704	0	88.587	53	1
sp|O00429|DNM1L_HUMAN	1	18	18	17.1	81.876	0	309.97	75	1
sp|O00461|GOLI4_HUMAN	1	5	5	4	81.879	0	50.433	17	1
sp|O00468|AGRIN_HUMAN	1	14	14	0.7	217.23	0	47.761	19	1
sp|O00469|PLOD2_HUMAN	1	5	5	1.9	84.685	0	10.571	7	1
sp|O00471|EXOC5_HUMAN	1	6	6	4.8	81.852	0	29.436	17	1
sp|O00483|NDUA4_HUMAN	1	2	2	14.8	9.3697	0	5.8626	5	1
sp|O00487|PSDE_HUMAN	1	5	5	17.4	34.577	0	47.921	55	1
sp|O00505|IMA4_HUMAN	1	8	5	6.9	57.81	0	53.805	32	1
sp|O00541|PESC_HUMAN	1	7	7	4.3	68.002	0	19.684	10	1
sp|O00560|SDCB1_HUMAN	1	6	6	18.1	32.444	0	110.52	32	1
sp|O00566|MPP10_HUMAN	1	6	6	2.9	78.863	0	19.218	11	1
sp|O00567|NOP56_HUMAN	1	15	15	25.8	66.049	0	219.26	98	1
sp|O00571|DDX3X_HUMAN;sp|O15523|DDX3Y_HUMAN	2	12;9	11;8	11.9	73.243	0	114.17	78	1
sp|O00592|PODXL_HUMAN	1	4	4	2.3	58.635	0	17.683	31	1
sp|O00629|IMA3_HUMAN	1	11	8	6	57.886	0	50.52	36	1
sp|O00743|PPP6_HUMAN	1	5	5	3	35.144	0	17.198	7	1
sp|O00754|MA2B1_HUMAN	1	8	8	1.2	113.74	0	55.141	22	1
sp|O00764|PDXK_HUMAN	1	7	7	17.6	35.102	0	34.487	32	1
sp|O14493|CLD4_HUMAN;sp|O95484|CLD9_HUMAN;sp|P56747|CLD6_HUMAN;sp|O15551|CLD3_HUMAN	4	1;1;1;1	1;1;1;1	7.7	22.077	0	7.4618	10	1
sp|O14548|COX7R_HUMAN	1	3	3	11.4	12.615	0	10.136	13	1
sp|O14561|ACPM_HUMAN	1	2	2	9.6	17.417	0	6.1059	5	1
sp|O14579|COPE_HUMAN	1	6	6	15.6	34.482	0	110.76	19	1
sp|O14617|AP3D1_HUMAN	1	12	12	4	130.16	0	41.862	26	1
sp|O14657|TOR1B_HUMAN	1	4	4	3.3	37.978	0	21.83	10	1
sp|O14672|ADA10_HUMAN	1	8	8	10.3	84.141	0	75.063	27	1
sp|O14734|ACOT8_HUMAN	1	3	3	5	35.914	0	13.264	8	1
sp|O14737|PDCD5_HUMAN	1	6	6	27.2	14.285	0	48.199	22	1
sp|O14744|ANM5_HUMAN	1	4	4	3.5	72.683	0	24.052	36	1
sp|O14745|NHRF1_HUMAN	1	8	8	18.4	38.868	0	125.38	77	1
sp|O14773|TPP1_HUMAN	1	3	3	8.2	61.247	0	32.381	35	1
sp|O14776|TCRG1_HUMAN	1	9	9	3.6	123.9	0	18.645	17	1
sp|O14787|TNPO2_HUMAN	1	7	5	6.5	101.39	0	44.917	42	1
sp|O14818|PSA7_HUMAN;sp|Q8TAA3|PSA7L_HUMAN	2	7;3	7;3	27.8	27.887	0	323.31	54	1
sp|O14828|SCAM3_HUMAN	1	7	7	9.8	38.287	0	36.419	15	1
sp|O14908|GIPC1_HUMAN;sp|Q8TF64|GIPC3_HUMAN	2	7;1	7;1	9	36.049	0	36.297	14	1
sp|O14925|TIM23_HUMAN;sp|Q5SRD1|TI23B_HUMAN	2	2;2	2;2	17.7	21.943	0	54.16	8	1
sp|O14929|HAT1_HUMAN	1	7	7	6.9	49.512	0	24.385	14	1
sp|O14936|CSKP_HUMAN	1	10	10	1.5	105.12	0	24.117	17	1
sp|O14949|QCR8_HUMAN	1	2	2	8.5	9.9062	0	4.3295	4	1
sp|O14974|MYPT1_HUMAN	1	7	7	1.4	115.28	0	12.987	19	1
sp|O14979|HNRDL_HUMAN	1	3	3	1.9	46.437	0	17.821	15	1
sp|O14980|XPO1_HUMAN	1	29	29	19.1	123.38	0	323.31	182	1
sp|O15020|SPTN2_HUMAN	1	14	10	0.6	271.32	0	41.949	14	1
sp|O15031|PLXB2_HUMAN	1	22	22	7.7	205.12	0	125.77	113	1
sp|O15067|PUR4_HUMAN	1	9	9	2.1	144.73	0	21.325	25	1
sp|O15127|SCAM2_HUMAN	1	2	2	9.7	36.648	0	16.499	10	1
sp|O15143|ARC1B_HUMAN	1	4	3	2.2	40.949	0	24.408	10	1
sp|O15144|ARPC2_HUMAN	1	4	4	2.3	34.333	0	10.695	23	1
sp|O15145|ARPC3_HUMAN	1	2	2	6.2	20.546	0	8.7806	13	1
sp|O15155|BET1_HUMAN	1	1	1	15.3	13.289	0	10.153	4	1
sp|O15160|RPAC1_HUMAN	1	7	7	10.7	39.249	0	29.959	17	1
sp|O15173|PGRC2_HUMAN	1	5	5	18.4	23.818	0	44.154	44	1
sp|O15212|PFD6_HUMAN	1	2	2	9.3	14.582	0	21.532	21	1
sp|O15231|ZN185_HUMAN	1	3	3	2.5	73.525	0	5.1215	4	1
sp|O15258|RER1_HUMAN	1	2	2	5.6	22.958	0	9.097	2	1
sp|O15260|SURF4_HUMAN	1	3	3	6.7	30.394	0	46.469	19	1
sp|O15269|SPTC1_HUMAN	1	2	2	3	52.743	0	30.614	16	1
sp|O15270|SPTC2_HUMAN	1	8	8	3.6	62.924	0	13.103	12	1
sp|O15294|OGT1_HUMAN	1	12	12	1.5	116.92	0	51.448	40	1
sp|O15305|PMM2_HUMAN	1	3	3	13	28.082	0	15.377	12	1
sp|O15320|CTGE5_HUMAN	1	4	4	5	90.995	0	28.681	3	1
sp|O15327|INP4B_HUMAN	1	11	11	1.4	104.74	0	40.974	15	1
sp|O15347|HMGB3_HUMAN	1	3	3	13.5	22.98	0	4.7066	8	1
sp|O15355|PPM1G_HUMAN	1	8	8	18.9	59.271	0	71.384	41	1
sp|O15371|EIF3D_HUMAN	1	8	8	2.6	63.972	0	131.38	48	1
sp|O15372|EIF3H_HUMAN	1	6	6	9.4	39.93	0	26.989	19	1
sp|O15379|HDAC3_HUMAN	1	1	1	3.5	48.847	0	7.9416	1	1
sp|O15382|BCAT2_HUMAN	1	9	9	19.4	44.287	0	126.81	50	1
sp|O15400|STX7_HUMAN	1	4	4	5.7	29.815	0	16.304	10	1
sp|O15427|MOT4_HUMAN	1	1	1	1.7	49.469	0.0024863	2.2552	7	1
sp|O15446|RPA34_HUMAN	1	8	8	7.1	54.985	0	49.143	27	1
sp|O15479|MAGB2_HUMAN	1	2	2	3.4	35.277	0	4.4537	3	1
sp|O15511|ARPC5_HUMAN	1	4	4	7.9	16.32	0	21.568	15	1
sp|O15514|RPB4_HUMAN	1	2	2	11.3	16.311	0	9.5945	4	1
sp|O43143|DHX15_HUMAN	1	9	9	1.5	90.932	0	31.358	48	1
sp|O43148|MCES_HUMAN	1	8	8	13.7	54.843	0	42.867	18	1
sp|O43169|CYB5B_HUMAN	1	4	4	8.2	16.332	0	20.581	11	1
sp|O43172|PRP4_HUMAN	1	6	6	3.1	58.449	0	33.516	22	1
sp|O43175|SERA_HUMAN	1	16	16	18.2	56.65	0	323.31	291	1
sp|O43237|DC1L2_HUMAN	1	7	7	2.6	54.099	0	99.08	15	1
sp|O43242|PSMD3_HUMAN	1	9	9	5.4	60.977	0	42.269	21	1
sp|O43264|ZW10_HUMAN	1	14	14	6.8	88.828	0	101.31	33	1
sp|O43290|SNUT1_HUMAN	1	11	11	4.6	90.254	0	51.677	22	1
sp|O43291|SPIT2_HUMAN	1	1	1	6.3	28.228	0	4.6323	1	1
sp|O43390|HNRPR_HUMAN	1	8	5	9.6	70.942	0	41.472	18	1
sp|O43399|TPD54_HUMAN	1	9	9	34.5	22.237	0	88.188	85	1
sp|O43432|IF4G3_HUMAN	1	4	1	1.2	176.65	0	7.5485	2	1
sp|O43447|PPIH_HUMAN	1	4	4	5.6	19.208	0	32.385	7	1
sp|O43488|ARK72_HUMAN;sp|Q8NHP1|ARK74_HUMAN	2	4;1	4;1	9.5	39.589	0	20.857	24	1
sp|O43491|E41L2_HUMAN;sp|Q9Y2J2|E41L3_HUMAN	2	16;1	16;1	12.5	112.59	0	153.12	33	1
sp|O43504|LTOR5_HUMAN	1	4	4	22	9.6138	0	63.012	6	1
sp|O43583|DENR_HUMAN	1	2	2	11.1	22.092	0	7.1319	5	1
sp|O43592|XPOT_HUMAN	1	15	15	4.7	109.96	0	149.74	55	1
sp|O43615|TIM44_HUMAN	1	9	9	13.1	51.355	0	137.09	41	1
sp|O43617|TPPC3_HUMAN	1	4	4	6.1	20.274	0	18.43	15	1
sp|O43670|ZN207_HUMAN	1	3	3	2.7	50.75	0	32.441	28	1
sp|O43678|NDUA2_HUMAN	1	2	2	21.2	10.921	0	22.141	6	1
sp|O43681|ASNA_HUMAN	1	5	5	3.7	38.792	0	11.758	9	1
sp|O43684|BUB3_HUMAN	1	6	6	13.4	37.154	0	30.598	21	1
sp|O43707|ACTN4_HUMAN;sp|Q08043|ACTN3_HUMAN	2	41;5	29;0	40.9	104.85	0	323.31	826	1
sp|O43747|AP1G1_HUMAN	1	8	8	2.3	91.35	0	49.498	33	1
sp|O43760|SNG2_HUMAN	1	1	1	4.5	24.81	0	10.317	11	1
sp|O43772|MCAT_HUMAN	1	3	3	3	32.943	0	6.0395	11	1
sp|O43776|SYNC_HUMAN	1	6	6	2.2	62.942	0	32.592	7	1
sp|O43809|CPSF5_HUMAN	1	6	6	14.1	26.227	0	183.3	62	1
sp|O43815|STRN_HUMAN	1	12	12	2.8	86.131	0	66.214	30	1
sp|O43837|IDH3B_HUMAN	1	5	5	4.4	42.183	0	32.734	26	1
sp|O43847|NRDC_HUMAN	1	8	8	1	131.57	0	22.356	10	1
sp|O43852|CALU_HUMAN	1	8	8	12.1	37.106	0	53.393	22	1
sp|O43865|SAHH2_HUMAN	1	3	1	2.3	58.951	0	9.074	5	1
sp|O43920|NDUS5_HUMAN	1	3	3	6.6	12.517	0	6.4007	4	1
sp|O60216|RAD21_HUMAN	1	12	12	11.4	71.689	0	106.87	34	1
sp|O60220|TIM8A_HUMAN	1	2	2	41.2	10.998	0	159.07	7	1
sp|O60232|SSA27_HUMAN	1	5	5	23.6	21.474	0	76.079	18	1
sp|O60264|SMCA5_HUMAN	1	14	11	5.4	121.9	0	43.537	23	1
sp|O60271|JIP4_HUMAN	1	6	6	1.2	146.2	0	23.857	10	1
sp|O60313|OPA1_HUMAN	1	22	22	7.6	111.63	0	209.43	87	1
sp|O60437|PEPL_HUMAN	1	30	30	10.1	204.74	0	190.28	80	1
sp|O60488|ACSL4_HUMAN	1	5	3	4.1	79.187	0	5.197	8	1
sp|O60502|OGA_HUMAN	1	5	5	2.4	102.91	0	17.157	11	1
sp|O60506|HNRPQ_HUMAN	1	12	9	15.6	69.602	0	100.54	60	1
sp|O60568|PLOD3_HUMAN	1	11	11	10	84.784	0	62.011	41	1
sp|O60610|DIAP1_HUMAN	1	19	19	4.7	141.35	0	125.62	78	1
sp|O60613|SEP15_HUMAN	1	3	3	9.9	17.79	0	9.0469	8	1
sp|O60645|EXOC3_HUMAN	1	7	7	2.2	86.844	0	12.024	8	1
sp|O60664|PLIN3_HUMAN	1	15	15	40.6	47.074	0	323.31	378	1
sp|O60684|IMA7_HUMAN;sp|O15131|IMA6_HUMAN	2	10;6	5;2	7.8	60.029	0	101.79	67	1
sp|O60716|CTND1_HUMAN	1	19	19	8.3	108.17	0	203.57	124	1
sp|O60749|SNX2_HUMAN	1	10	8	14.1	58.47	0	65.459	32	1
sp|O60762|DPM1_HUMAN	1	4	4	4.2	29.634	0	7.9555	7	1
sp|O60763|USO1_HUMAN	1	17	17	8.2	107.89	0	125.15	43	1
sp|O60784|TOM1_HUMAN	1	8	8	5.7	53.818	0	65.347	26	1
sp|O60841|IF2P_HUMAN	1	10	10	1	138.83	0	48.146	30	1
sp|O60884|DNJA2_HUMAN	1	7	7	7	45.745	0	51.507	20	1
sp|O60925|PFD1_HUMAN	1	2	2	9	14.21	0	20.21	15	1
sp|O75083|WDR1_HUMAN	1	11	11	7.8	66.193	0	138.37	42	1
sp|O75116|ROCK2_HUMAN	1	8	5	1.9	160.9	0	105.73	14	1
sp|O75131|CPNE3_HUMAN	1	4	4	4.5	60.13	0	36.185	11	1
sp|O75150|BRE1B_HUMAN	1	6	5	1.6	113.65	0	3.9487	4	1
sp|O75153|CLU_HUMAN;sp|Q9Y5I4|PCDC2_HUMAN	2	12;1	12;1	2.1	146.67	0	25.648	22	1
sp|O75165|DJC13_HUMAN	1	10	10	0.5	254.41	0	28.977	15	1
sp|O75175|CNOT3_HUMAN	1	3	3	0.9	81.871	0	24.524	5	1
sp|O75179|ANR17_HUMAN	1	11	5	0.5	274.25	0	26.483	12	1
sp|O75190|DNJB6_HUMAN;sp|Q8WWF6|DNJB3_HUMAN	2	4;1	4;1	3.4	36.087	0	33.692	17	1
sp|O75208|COQ9_HUMAN	1	2	2	6.6	35.509	0	8.7765	7	1
sp|O75251|NDUS7_HUMAN	1	2	2	4.2	23.563	0	12.552	8	1
sp|O75306|NDUS2_HUMAN	1	10	10	8.6	52.545	0	103.31	33	1
sp|O75340|PDCD6_HUMAN	1	5	5	17.8	21.868	0	107.62	42	1
sp|O75348|VATG1_HUMAN;sp|O95670|VATG2_HUMAN	2	3;1	3;1	22	13.757	0	21.899	3	1
sp|O75367|H2AY_HUMAN	1	4	4	5.4	39.617	0	34.361	18	1
sp|O75369|FLNB_HUMAN	1	90	84	43.5	278.16	0	323.31	1430	1
sp|O75381|PEX14_HUMAN	1	4	4	13.3	41.236	0	13.773	43	1
sp|O75390|CISY_HUMAN	1	7	7	12.2	51.712	0	77.677	96	1
sp|O75396|SC22B_HUMAN	1	4	4	5.6	24.593	0	40.755	28	1
sp|O75400|PR40A_HUMAN	1	9	9	2.9	108.8	0	55.164	30	1
sp|O75431|MTX2_HUMAN	1	6	6	22.8	29.763	0	87.996	25	1
sp|O75436|VP26A_HUMAN	1	6	6	9.5	38.169	0	20.965	11	1
sp|O75439|MPPB_HUMAN	1	8	8	13.1	54.366	0	108.74	22	1
sp|O75475|PSIP1_HUMAN	1	3	3	4.9	60.103	0	4.8602	4	1
sp|O75477|ERLN1_HUMAN	1	5	4	17.3	38.925	0	58.463	15	1
sp|O75489|NDUS3_HUMAN	1	8	8	27.3	30.241	0	146.34	53	1
sp|O75506|HSBP1_HUMAN	1	1	1	32.9	8.5435	0	4.124	3	1
sp|O75521|ECI2_HUMAN	1	8	8	6.1	43.585	0	21.363	13	1
sp|O75531|BAF_HUMAN	1	2	2	7.9	10.058	0	31.104	11	1
sp|O75533|SF3B1_HUMAN	1	25	25	13.2	145.83	0	323.31	134	1
sp|O75534|CSDE1_HUMAN	1	14	14	6.6	88.884	0	119.66	35	1
sp|O75569|PRKRA_HUMAN	1	4	4	4.8	34.404	0	13.056	3	1
sp|O75607|NPM3_HUMAN	1	4	4	17.4	19.343	0	179.21	34	1
sp|O75608|LYPA1_HUMAN	1	4	4	11.7	24.669	0	51.634	53	1
sp|O75643|U520_HUMAN	1	29	29	5.9	244.5	0	180.95	93	1
sp|O75674|TM1L1_HUMAN	1	7	7	2.7	52.988	0	29.427	15	1
sp|O75694|NU155_HUMAN	1	18	18	7.5	155.2	0	107.83	42	1
sp|O75718|CRTAP_HUMAN	1	5	5	9.2	46.561	0	57.224	14	1
sp|O75746|CMC1_HUMAN	1	10	7	10.2	74.761	0	37.344	22	1
sp|O75787|RENR_HUMAN	1	2	2	3.1	39.008	0	4.1668	3	1
sp|O75821|EIF3G_HUMAN	1	8	8	18.8	35.611	0	105.37	18	1
sp|O75822|EIF3J_HUMAN	1	4	4	14.3	29.062	0	34.984	6	1
sp|O75832|PSD10_HUMAN	1	4	4	19	24.428	0	26.888	9	1
sp|O75844|FACE1_HUMAN	1	2	2	1.7	54.812	0.0013004	2.7343	2	1
sp|O75874|IDHC_HUMAN	1	11	10	17.1	46.659	0	47.804	27	1
sp|O75882|ATRN_HUMAN	1	5	5	0.9	158.54	0	4.044	5	1
sp|O75886|STAM2_HUMAN	1	4	4	2.5	58.164	0	10.939	12	1
sp|O75934|SPF27_HUMAN	1	5	5	24.9	26.131	0	42.906	37	1
sp|O75935|DCTN3_HUMAN	1	1	1	10.8	21.119	0	10.276	3	1
sp|O75947|ATP5H_HUMAN	1	4	4	33.5	18.491	0	40.883	47	1
sp|O75955|FLOT1_HUMAN	1	9	9	12.4	47.355	0	47.781	47	1
sp|O75962|TRIO_HUMAN;sp|O60229|KALRN_HUMAN	2	13;2	13;2	0.3	346.9	0	31.274	22	1
sp|O75964|ATP5L_HUMAN	1	2	2	12.6	11.428	0	4.4323	5	1
sp|O75976|CBPD_HUMAN	1	15	15	6	152.93	0	73.081	44	1
sp|O76003|GLRX3_HUMAN	1	9	9	17	37.432	0	73.349	60	1
sp|O76031|CLPX_HUMAN	1	10	10	3.5	69.223	0	32.601	23	1
sp|O76054|S14L2_HUMAN;sp|Q9UDX4|S14L3_HUMAN	2	2;1	2;1	5.7	46.145	0	6.6215	3	1
sp|O76070|SYUG_HUMAN	1	5	5	29.1	13.331	0	159.39	50	1
sp|O76094|SRP72_HUMAN	1	12	12	8.3	74.605	0	74.539	31	1
sp|O94763|RMP_HUMAN	1	5	5	2.4	59.832	0	5.5581	5	1
sp|O94776|MTA2_HUMAN	1	2	2	2.2	75.022	0.0022642	2.3568	4	1
sp|O94804|STK10_HUMAN	1	2	2	1.5	112.13	0	3.1729	3	1
sp|O94826|TOM70_HUMAN	1	16	16	24.8	67.454	0	323.31	180	1
sp|O94842|TOX4_HUMAN	1	5	5	3.7	66.194	0	27.459	19	1
sp|O94874|UFL1_HUMAN	1	16	16	5.2	89.594	0	61.776	38	1
sp|O94888|UBXN7_HUMAN	1	6	6	5.1	54.862	0	40.115	16	1
sp|O94901|SUN1_HUMAN	1	11	11	7.5	90.063	0	63.438	30	1
sp|O94905|ERLN2_HUMAN	1	10	9	25.7	37.839	0	71.932	46	1
sp|O94906|PRP6_HUMAN	1	8	8	6	106.92	0	30.711	33	1
sp|O94925|GLSK_HUMAN	1	10	10	6.7	73.46	0	69.997	28	1
sp|O94973|AP2A2_HUMAN	1	13	9	8.9	103.96	0	110.87	48	1
sp|O94979|SC31A_HUMAN	1	13	13	7.3	133.01	0	154.66	47	1
sp|O94992|HEXI1_HUMAN	1	2	2	7	40.623	0	11.224	3	1
sp|O95071|UBR5_HUMAN	1	18	18	0.8	309.35	0	41.836	26	1
sp|O95104|SFR15_HUMAN	1	4	3	1	125.87	0	9.8185	3	1
sp|O95159|ZFPL1_HUMAN	1	2	2	2.9	34.114	0.0083701	1.5298	2	1
sp|O95168|NDUB4_HUMAN	1	2	2	7.8	15.208	0	11.745	8	1
sp|O95169|NDUB8_HUMAN	1	3	3	5.9	21.766	0	4.903	7	1
sp|O95182|NDUA7_HUMAN	1	2	2	15.9	12.551	0	3.5395	2	1
sp|O95197|RTN3_HUMAN	1	1	1	3.8	112.61	0	30.862	3	1
sp|O95202|LETM1_HUMAN	1	17	17	18.9	83.353	0	147.93	69	1
sp|O95218|ZRAB2_HUMAN	1	1	1	3.3	37.404	0	5.0512	3	1
sp|O95219|SNX4_HUMAN	1	3	3	2	51.908	0.00027078	3.1022	2	1
sp|O95249|GOSR1_HUMAN	1	5	5	3.6	28.612	0	12.396	5	1
sp|O95251|KAT7_HUMAN	1	2	2	3.9	70.642	0	5.7027	2	1
sp|O95292|VAPB_HUMAN	1	6	5	10.7	27.228	0	56.158	64	1
sp|O95297|MPZL1_HUMAN	1	2	2	5.6	29.082	0	7.4571	10	1
sp|O95336|6PGL_HUMAN	1	8	8	12	27.547	0	41.351	22	1
sp|O95373|IPO7_HUMAN	1	18	18	10.4	119.52	0	221.32	123	1
sp|O95394|AGM1_HUMAN	1	3	3	2.4	59.851	0	6.9689	3	1
sp|O95433|AHSA1_HUMAN	1	4	4	3.6	38.274	0	12.073	9	1
sp|O95453|PARN_HUMAN	1	5	5	4.7	73.45	0	6.2787	9	1
sp|O95456|PSMG1_HUMAN	1	2	2	3.5	32.854	0	7.6425	6	1
sp|O95479|G6PE_HUMAN	1	9	9	3.3	88.892	0	29.406	17	1
sp|O95486|SC24A_HUMAN	1	7	6	1.4	119.75	0	11.666	9	1
sp|O95490|AGRL2_HUMAN	1	4	4	1	163.35	0	5.5906	4	1
sp|O95571|ETHE1_HUMAN	1	6	6	12.2	27.873	0	40.628	66	1
sp|O95573|ACSL3_HUMAN	1	14	12	8.9	80.419	0	68.069	48	1
sp|O95671|ASML_HUMAN	1	4	4	2.6	68.856	0	14.5	8	1
sp|O95721|SNP29_HUMAN	1	4	4	17.4	28.97	0	18.869	6	1
sp|O95747|OXSR1_HUMAN	1	5	5	2.7	58.022	0	26.403	15	1
sp|O95757|HS74L_HUMAN	1	10	7	5.2	94.511	0	20.73	11	1
sp|O95758|PTBP3_HUMAN	1	6	5	5.8	59.689	0	40.388	13	1
sp|O95777|LSM8_HUMAN	1	2	2	10.4	10.403	0	11.677	5	1
sp|O95782|AP2A1_HUMAN	1	21	17	11.1	107.54	0	95.325	73	1
sp|O95793|STAU1_HUMAN	1	8	8	2.3	63.182	0	25.365	19	1
sp|O95807|TM50A_HUMAN	1	1	1	5.1	17.4	0.00053662	3.0103	3	1
sp|O95810|SDPR_HUMAN	1	8	8	28	47.173	0	130.05	67	1
sp|O95816|BAG2_HUMAN	1	4	4	12.3	23.772	0	37.677	16	1
sp|O95817|BAG3_HUMAN	1	5	5	2.3	61.594	0	19.697	14	1
sp|O95831|AIFM1_HUMAN	1	10	10	13.9	66.9	0	51.538	32	1
sp|O95857|TSN13_HUMAN	1	1	1	10.3	22.147	0	4.2176	3	1
sp|O95881|TXD12_HUMAN	1	4	4	16.9	19.206	0	23.263	19	1
sp|O95926|SYF2_HUMAN	1	1	1	11.5	28.722	0	9.8959	2	1
sp|O95983|MBD3_HUMAN	1	3	3	5.2	32.844	0	25.577	17	1
sp|O95994|AGR2_HUMAN;sp|Q8TD06|AGR3_HUMAN	2	5;1	5;1	22.3	19.979	0	40	23	1
sp|O96000|NDUBA_HUMAN	1	5	5	7.6	20.776	0	11.913	18	1
sp|O96005|CLPT1_HUMAN	1	3	3	8.1	76.096	0	11.24	42	1
sp|O96008|TOM40_HUMAN	1	9	9	36	37.893	0	202.14	59	1
sp|O96019|ACL6A_HUMAN;sp|O94805|ACL6B_HUMAN	2	8;2	8;2	12.6	47.46	0	52.31	23	1
sp|P00338|LDHA_HUMAN	1	10	10	23.5	36.688	0	191.01	207	1
sp|P00367|DHE3_HUMAN;sp|P49448|DHE4_HUMAN	2	14;7	14;7	16.7	61.397	0	141.74	62	1
sp|P00387|NB5R3_HUMAN	1	6	6	18.9	34.234	0	33.324	20	1
sp|P00390|GSHR_HUMAN	1	7	7	2.1	56.256	0	65.679	30	1
sp|P00403|COX2_HUMAN	1	4	4	17.6	25.565	0	35.661	41	1
sp|P00441|SODC_HUMAN	1	2	2	9.1	15.936	0	56.716	29	1
sp|P00491|PNPH_HUMAN	1	8	8	20.8	32.118	0	57.057	19	1
sp|P00492|HPRT_HUMAN	1	3	3	6	24.579	0	6.1863	9	1
sp|P00505|AATM_HUMAN	1	13	13	26	47.517	0	323.31	182	1
sp|P00533|EGFR_HUMAN	1	20	19	12.4	134.28	0	161.93	102	1
sp|P00558|PGK1_HUMAN;sp|P07205|PGK2_HUMAN	2	16;2	16;2	39.1	44.614	0	323.31	165	1
sp|P00568|KAD1_HUMAN	1	2	2	7.2	21.635	0	3.4198	3	1
sp|P00738|HPT_HUMAN;sp|P00739|HPTR_HUMAN	2	6;1	6;1	8.4	45.205	0	81.855	183	1
sp|P00966|ASSY_HUMAN	1	1	1	3.2	46.53	0	9.0983	3	1
sp|P01009|A1AT_HUMAN	1	11	11	15.3	46.736	0	98.396	313	1
sp|P01011|AACT_HUMAN	1	8	8	8.7	47.65	0	28.328	25	1
sp|P01023|A2MG_HUMAN;sp|P20742|PZP_HUMAN	2	21;4	20;3	2.6	163.29	0	82.391	244	1
sp|P01024|CO3_HUMAN	1	23	22	4.5	187.15	0	123.05	201	1
sp|P01111|RASN_HUMAN	1	6	2	12.7	21.229	0	25.091	13	1
sp|P01112|RASH_HUMAN	1	5	1	6.3	21.298	0	6.6787	3	1
sp|P01834|IGKC_HUMAN	1	5	5	15.1	11.609	0	28.052	171	1
sp|P01857|IGHG1_HUMAN;sp|P01860|IGHG3_HUMAN	2	10;3	6;1	4.8	36.105	0	230.21	252	1
sp|P01859|IGHG2_HUMAN	1	5	3	4.9	35.9	0	91.658	78	1
sp|P01892|1A02_HUMAN;sp|P30456|1A43_HUMAN;sp|P16189|1A31_HUMAN;sp|Q95604|1C17_HUMAN	4	7;3;3;3	0;0;0;0	21.6	40.921	0	13.359	9	1
sp|P02545|LMNA_HUMAN	1	20	20	30.4	74.139	0	323.31	440	1
sp|P02649|APOE_HUMAN	1	2	2	5.4	36.154	0	7.5127	2	1
sp|P02652|APOA2_HUMAN	1	3	3	48	11.175	0	116.45	348	1
sp|P02786|TFR1_HUMAN	1	22	22	17.1	84.87	0	323.31	235	1
sp|P02787|TRFE_HUMAN	1	15	15	10.6	77.063	0	128.57	532	1
sp|P02790|HEMO_HUMAN	1	8	8	5.8	51.676	0	71.404	135	1
sp|P02792|FRIL_HUMAN	1	2	2	8.6	20.019	0	13.674	12	1
sp|P02795|MT2_HUMAN	1	1	1	32.8	6.0422	0	44.11	1	1
sp|P04040|CATA_HUMAN	1	13	13	17.5	59.755	0	51.116	41	1
sp|P04062|GLCM_HUMAN	1	4	4	2.4	59.716	0	26.124	22	1
sp|P04066|FUCO_HUMAN	1	2	2	4.7	53.688	0	6.2592	11	1
sp|P04075|ALDOA_HUMAN	1	14	12	46.2	39.42	0	323.31	156	1
sp|P04080|CYTB_HUMAN	1	5	5	65.3	11.139	0	107.1	83	1
sp|P04083|ANXA1_HUMAN	1	20	20	43.6	38.714	0	323.31	359	1
sp|P04156|PRIO_HUMAN	1	1	1	4.7	27.661	0	4.5564	2	1
sp|P04181|OAT_HUMAN	1	11	11	22.1	48.534	0	73.463	94	1
sp|P04350|TBB4A_HUMAN	1	13	1	29.7	49.585	0	6.6087	1	1
sp|P04406|G3P_HUMAN	1	15	15	33.4	36.053	0	323.31	480	1
sp|P04632|CPNS1_HUMAN;sp|Q96L46|CPNS2_HUMAN	2	6;1	6;1	41	28.315	0	116.02	52	1
sp|P04792|HSPB1_HUMAN	1	8	8	36.1	22.782	0	323.31	134	1
sp|P04843|RPN1_HUMAN	1	15	15	17	68.569	0	190.07	135	1
sp|P04844|RPN2_HUMAN	1	13	13	33.4	69.283	0	323.31	123	1
sp|P04899|GNAI2_HUMAN	1	10	7	28.7	40.45	0	285.93	94	1
sp|P05023|AT1A1_HUMAN;sp|P50993|AT1A2_HUMAN;sp|Q13733|AT1A4_HUMAN;sp|P54707|AT12A_HUMAN;sp|P20648|ATP4A_HUMAN	5	23;9;6;3;2	11;0;0;0;0	19	112.89	0	323.31	278	1
sp|P05026|AT1B1_HUMAN	1	5	5	17.8	35.061	0	130.95	153	1
sp|P05091|ALDH2_HUMAN	1	15	15	21.9	56.381	0	87.403	76	1
sp|P05114|HMGN1_HUMAN	1	1	1	21	10.659	0.0070788	1.6608	1	1
sp|P05141|ADT2_HUMAN;sp|Q9H0C2|ADT4_HUMAN	2	9;1	6;0	28.9	32.852	0	112.75	120	1
sp|P05161|ISG15_HUMAN	1	2	2	7.9	17.887	0	16.181	10	1
sp|P05165|PCCA_HUMAN	1	6	6	2.2	80.058	0	11.054	9	1
sp|P05166|PCCB_HUMAN	1	5	5	5.6	58.215	0	13.975	4	1
sp|P05198|IF2A_HUMAN	1	6	6	15.9	36.112	0	36.891	24	1
sp|P05362|ICAM1_HUMAN	1	13	13	28	57.825	0	323.31	246	1
sp|P05386|RLA1_HUMAN	1	2	2	51.8	11.514	0	82.402	83	1
sp|P05387|RLA2_HUMAN	1	8	8	73	11.665	0	323.31	282	1
sp|P05388|RLA0_HUMAN;sp|Q8NHW5|RLA0L_HUMAN	2	9;5	9;5	39.7	34.273	0	229.18	194	1
sp|P05455|LA_HUMAN	1	6	6	15	46.836	0	15.275	29	1
sp|P05534|1A24_HUMAN;sp|P30447|1A23_HUMAN;sp|Q29960|1C16_HUMAN;sp|Q9TNN7|1C05_HUMAN	4	7;6;3;2	0;0;0;0	17	40.688	0	8.7929	2	1
sp|P05556|ITB1_HUMAN	1	12	12	12.3	88.414	0	323.31	249	1
sp|P05783|K1C18_HUMAN;CON__H-INV:HIT000015463	2	16;1	11;1	50.2	48.057	0	323.31	449	1
sp|P05976|MYL1_HUMAN;sp|P08590|MYL3_HUMAN	2	1;1	1;1	8.2	21.145	0	38.453	46	1
sp|P06132|DCUP_HUMAN	1	6	6	11.2	40.786	0	31.287	12	1
sp|P06276|CHLE_HUMAN	1	4	4	10.5	68.417	0	24.081	16	1
sp|P06280|AGAL_HUMAN	1	6	6	4	48.766	0	28.422	18	1
sp|P06493|CDK1_HUMAN	1	6	6	7.1	34.095	0	20.921	10	1
sp|P06576|ATPB_HUMAN	1	18	18	47.4	56.559	0	323.31	562	1
sp|P06730|IF4E_HUMAN	1	1	1	3.2	25.097	0.0057116	1.7616	9	1
sp|P06733|ENOA_HUMAN	1	20	17	41.9	47.168	0	323.31	550	1
sp|P06737|PYGL_HUMAN	1	13	11	6	97.147	0	41.903	42	1
sp|P06744|G6PI_HUMAN	1	10	6	14.2	63.146	0	93.471	86	1
sp|P06748|NPM_HUMAN	1	6	6	21.4	32.575	0	323.31	114	1
sp|P06753|TPM3_HUMAN	1	6	4	12.6	32.95	0	245.77	83	1
sp|P06756|ITAV_HUMAN	1	12	12	5.3	116.04	0	117.3	39	1
sp|P06865|HEXA_HUMAN	1	8	8	9.8	60.702	0	42.007	49	1
sp|P07099|HYEP_HUMAN	1	4	4	3.5	52.948	0	5.6258	11	1
sp|P07108|ACBP_HUMAN	1	2	2	23	10.044	0	6.1202	4	1
sp|P07237|PDIA1_HUMAN	1	20	20	33.9	57.116	0	323.31	362	1
sp|P07339|CATD_HUMAN	1	11	11	32.3	44.552	0	148.67	157	1
sp|P07355|ANXA2_HUMAN;sp|A6NMY6|AXA2L_HUMAN	2	22;16	22;16	52.5	38.604	0	323.31	580	1
sp|P07384|CAN1_HUMAN	1	15	15	12.3	81.889	0	108.25	61	1
sp|P07437|TBB5_HUMAN	1	16	4	29.3	49.67	0	97.051	87	1
sp|P07602|SAP_HUMAN	1	16	16	19.7	58.112	0	248.68	211	1
sp|P07686|HEXB_HUMAN	1	9	9	8.6	63.111	0	36.757	42	1
sp|P07737|PROF1_HUMAN;CON__P02584	2	8;3	8;3	55	15.054	0	323.31	219	1
sp|P07741|APT_HUMAN	1	8	8	27.2	19.608	0	131.35	65	1
sp|P07814|SYEP_HUMAN	1	22	22	11.8	170.59	0	224.56	127	1
sp|P07858|CATB_HUMAN	1	6	6	10.3	37.821	0	73.339	40	1
sp|P07900|HS90A_HUMAN;sp|Q14568|HS902_HUMAN;sp|Q58FG0|HS905_HUMAN;sp|Q58FG1|HS904_HUMAN	4	30;7;3;1	18;2;1;0	33.3	84.659	0	323.31	258	1
sp|P07910|HNRPC_HUMAN;sp|P0DMR1|HNRC4_HUMAN;sp|O60812|HNRC1_HUMAN;sp|B7ZW38|HNRC3_HUMAN;sp|B2RXH8|HNRC2_HUMAN	5	7;3;3;3;3	7;3;3;3;3	16.7	33.67	0	122.21	111	1
sp|P07919|QCR6_HUMAN	1	2	2	28.6	10.739	0	26.946	12	1
sp|P07942|LAMB1_HUMAN	1	11	11	2.9	198.04	0	52.399	28	1
sp|P07947|YES_HUMAN;sp|P12931|SRC_HUMAN;sp|P08631|HCK_HUMAN;sp|P06241|FYN_HUMAN	4	8;4;2;2	6;2;0;1	1.3	60.801	0	28.481	20	1
sp|P07948|LYN_HUMAN	1	5	3	1.4	58.573	0	6.1493	3	1
sp|P07954|FUMH_HUMAN	1	10	10	30.4	54.636	0	165.5	80	1
sp|P08047|SP1_HUMAN	1	2	2	3.6	80.692	0	37.291	17	1
sp|P08133|ANXA6_HUMAN	1	19	19	24.4	75.872	0	105.83	80	1
sp|P08134|RHOC_HUMAN	1	5	1	9.8	22.006	0.0018018	2.6345	2	1
sp|P08195|4F2_HUMAN	1	22	22	38.4	67.993	0	323.31	229	1
sp|P08237|PFKAM_HUMAN	1	9	8	2.2	85.182	0	15.63	13	1
sp|P08238|HS90B_HUMAN;sp|Q58FF7|H90B3_HUMAN	2	31;11	16;5	43.9	83.263	0	323.31	630	1
sp|P08240|SRPR_HUMAN	1	8	8	4.9	69.81	0	51.687	24	1
sp|P08243|ASNS_HUMAN	1	9	9	6.1	64.369	0	88.429	83	1
sp|P08559|ODPA_HUMAN	1	7	7	4.9	43.295	0	96.731	54	1
sp|P08574|CY1_HUMAN	1	3	3	12.6	35.422	0	13.847	25	1
sp|P08581|MET_HUMAN	1	13	13	4	155.54	0	43.531	26	1
sp|P08582|TRFM_HUMAN	1	11	11	10.4	80.214	0	157.16	48	1
sp|P08621|RU17_HUMAN	1	6	6	5.7	51.556	0	13.767	8	1
sp|P08648|ITA5_HUMAN	1	7	7	6	114.54	0	94.268	25	1
sp|P08670|VIME_HUMAN;sp|P41219|PERI_HUMAN;sp|Q16352|AINX_HUMAN;sp|P07197|NFM_HUMAN;sp|P07196|NFL_HUMAN;sp|P12036|NFH_HUMAN	6	29;2;2;2;1;1	25;2;0;0;0;0	52.4	53.651	0	323.31	605	1
sp|P08754|GNAI3_HUMAN	1	6	3	19.8	40.532	0	26.974	21	1
sp|P08758|ANXA5_HUMAN	1	14	14	43.1	35.936	0	323.31	152	1
sp|P08842|STS_HUMAN	1	3	3	2.7	65.492	0	5.9026	5	1
sp|P08865|RSSA_HUMAN	1	11	11	41.4	32.854	0	323.31	245	1
sp|P09001|RM03_HUMAN	1	2	2	2	38.632	0	3.9833	2	1
sp|P09012|SNRPA_HUMAN;sp|P08579|RU2B_HUMAN	2	4;1	4;1	6.7	31.279	0	57.414	20	1
sp|P09104|ENOG_HUMAN;sp|P13929|ENOB_HUMAN	2	9;3	6;0	11.5	47.268	0	26.077	14	1
sp|P09110|THIK_HUMAN	1	12	12	20	44.292	0	70.807	62	1
sp|P09132|SRP19_HUMAN	1	4	4	17.4	16.156	0	24.675	23	1
sp|P09211|GSTP1_HUMAN	1	9	9	30.5	23.356	0	323.31	219	1
sp|P09382|LEG1_HUMAN	1	6	6	45.2	14.716	0	305.42	181	1
sp|P09429|HMGB1_HUMAN;sp|B2RPK0|HGB1A_HUMAN;sp|P26583|HMGB2_HUMAN	3	4;3;1	4;3;1	15.3	24.893	0	87.88	36	1
sp|P09496|CLCA_HUMAN	1	2	2	2.8	27.076	0.0057293	1.7981	3	1
sp|P09525|ANXA4_HUMAN	1	7	7	12.2	35.882	0	48.891	20	1
sp|P09622|DLDH_HUMAN	1	5	5	10.6	54.177	0	60.43	72	1
sp|P09661|RU2A_HUMAN	1	6	6	16.5	28.415	0	46.706	18	1
sp|P09668|CATH_HUMAN	1	3	3	3.9	37.393	0	3.861	9	1
sp|P09758|TACD2_HUMAN	1	3	3	9.9	35.709	0	173.43	32	1
sp|P09874|PARP1_HUMAN	1	18	18	5.2	113.08	0	59.259	46	1
sp|P09960|LKHA4_HUMAN	1	12	12	6.1	69.284	0	82.952	47	1
sp|P09972|ALDOC_HUMAN	1	11	9	28.3	39.455	0	109.94	39	1
sp|P0C0L5|CO4B_HUMAN;sp|P0C0L4|CO4A_HUMAN	2	10;10	10;10	2.9	192.75	0	38.883	51	1
sp|P0C7U3|ZH11B_HUMAN;sp|Q9H8X9|ZDH11_HUMAN	2	1;1	1;1	3	41.894	0.0083818	1.5358	0	1
sp|P0CG06|LAC3_HUMAN;sp|P0CG05|LAC2_HUMAN;sp|P0CG04|LAC1_HUMAN;sp|B9A064|IGLL5_HUMAN;sp|P0CF74|LAC6_HUMAN;sp|A0M8Q6|LAC7_HUMAN	6	2;2;2;2;1;1	2;2;2;2;1;1	18.9	11.237	0	37.595	267	1
sp|P0CW22|RS17L_HUMAN;sp|P08708|RS17_HUMAN	2	7;7	7;7	51.9	15.55	0	123.46	67	1
sp|P0DMV9|HS71B_HUMAN;sp|P0DMV8|HS71A_HUMAN	2	20;20	11;11	30.4	70.051	0	323.31	252	1
sp|P10109|ADX_HUMAN	1	2	2	16.3	19.393	0	18.83	12	1
sp|P10253|LYAG_HUMAN	1	10	10	11	105.32	0	140.06	64	1
sp|P10301|RRAS_HUMAN	1	4	3	12.8	23.48	0	16.526	18	1
sp|P10316|1A69_HUMAN;sp|P01891|1A68_HUMAN;sp|P30457|1A66_HUMAN;sp|P30453|1A34_HUMAN;sp|P30450|1A26_HUMAN;sp|P18462|1A25_HUMAN;sp|P16190|1A33_HUMAN	7	7;6;4;4;4;4;4	0;0;0;0;0;0;0	17	40.976	0	3.5876	1	1
sp|P10412|H14_HUMAN;sp|P16402|H13_HUMAN;sp|P22492|H1T_HUMAN;sp|Q02539|H11_HUMAN	4	3;2;1;1	1;0;0;0	10.5	21.865	0	13.385	9	1
sp|P10515|ODP2_HUMAN	1	9	9	14.5	68.996	0	75.82	74	1
sp|P10599|THIO_HUMAN	1	4	4	22.9	11.737	0	49.548	84	1
sp|P10606|COX5B_HUMAN	1	4	4	18.6	13.696	0	38.363	71	1
sp|P10644|KAP0_HUMAN	1	6	6	8.9	42.981	0	107.08	33	1
sp|P10746|HEM4_HUMAN	1	2	2	5.7	28.627	0	3.998	3	1
sp|P10768|ESTD_HUMAN	1	5	5	10.6	31.462	0	132.6	47	1
sp|P10809|CH60_HUMAN	1	34	34	53.9	61.054	0	323.31	960	1
sp|P11021|GRP78_HUMAN	1	27	26	33.2	72.332	0	323.31	686	1
sp|P11047|LAMC1_HUMAN	1	9	9	3.8	177.6	0	49.473	10	1
sp|P11142|HSP7C_HUMAN	1	25	18	42.4	70.897	0	323.31	602	1
sp|P11171|41_HUMAN	1	2	2	1.4	97.016	0	6.0153	3	1
sp|P11172|UMPS_HUMAN	1	7	7	4.2	52.221	0	44.33	26	1
sp|P11177|ODPB_HUMAN	1	11	11	16.2	39.233	0	66.021	96	1
sp|P11216|PYGB_HUMAN;sp|P11217|PYGM_HUMAN	2	12;3	10;1	0.9	96.695	0	32.474	23	1
sp|P11233|RALA_HUMAN	1	3	2	10.2	23.567	0	10.455	9	1
sp|P11234|RALB_HUMAN	1	3	2	3.4	23.408	0	4.2053	2	1
sp|P11279|LAMP1_HUMAN	1	4	4	5.8	44.882	0	52.875	33	1
sp|P11310|ACADM_HUMAN	1	9	9	19.5	46.588	0	120.52	48	1
sp|P11387|TOP1_HUMAN;sp|Q969P6|TOP1M_HUMAN	2	12;2	12;2	13.5	90.725	0	58.849	44	1
sp|P11413|G6PD_HUMAN	1	16	16	19.6	59.256	0	80.765	74	1
sp|P11441|UBL4A_HUMAN	1	1	1	9.6	17.776	0	4.0941	5	1
sp|P11498|PYC_HUMAN	1	12	12	2.5	129.63	0	60.635	26	1
sp|P11586|C1TC_HUMAN	1	18	18	9.8	101.56	0	241.42	141	1
sp|P11717|MPRI_HUMAN	1	26	26	6.1	274.37	0	175.14	99	1
sp|P11766|ADHX_HUMAN	1	6	6	20.1	39.724	0	67.594	51	1
sp|P11908|PRPS2_HUMAN	1	5	2	15.1	34.769	0	5.3648	5	1
sp|P11940|PABP1_HUMAN;sp|Q9H361|PABP3_HUMAN;sp|Q4VXU2|PAP1L_HUMAN;sp|Q5JQF8|PAP1M_HUMAN;sp|Q96DU9|PABP5_HUMAN	5	18;7;3;1;1	13;6;2;1;1	19.8	70.67	0	178.99	168	1
sp|P12004|PCNA_HUMAN	1	7	7	15.3	28.768	0	155.58	90	1
sp|P12081|SYHC_HUMAN	1	11	7	10.6	57.41	0	54.198	28	1
sp|P12109|CO6A1_HUMAN	1	8	8	7.8	108.53	0	78.934	46	1
sp|P12236|ADT3_HUMAN;sp|P12235|ADT1_HUMAN	2	8;4	5;2	26.2	32.866	0	49.039	44	1
sp|P12268|IMDH2_HUMAN	1	10	10	17.3	55.804	0	108.54	96	1
sp|P12270|TPR_HUMAN	1	43	43	12.4	267.29	0	323.31	192	1
sp|P12277|KCRB_HUMAN	1	9	9	12.6	42.644	0	54.544	34	1
sp|P12429|ANXA3_HUMAN	1	7	7	16.1	36.375	0	53.609	38	1
sp|P12532|KCRU_HUMAN;sp|P17540|KCRS_HUMAN	2	7;1	7;1	14.9	47.036	0	66.799	63	1
sp|P12694|ODBA_HUMAN	1	5	5	10.1	50.47	0	19.029	13	1
sp|P12814|ACTN1_HUMAN;sp|P35609|ACTN2_HUMAN	2	33;7	22;2	34.9	103.06	0	323.31	151	1
sp|P12830|CADH1_HUMAN	1	5	5	2	97.455	0	31.557	12	1
sp|P12955|PEPD_HUMAN	1	6	6	2	54.548	0	65.12	31	1
sp|P12956|XRCC6_HUMAN	1	18	18	23.6	69.842	0	305.15	144	1
sp|P13010|XRCC5_HUMAN	1	19	19	21	82.704	0	220.77	211	1
sp|P13073|COX41_HUMAN	1	3	3	13	19.576	0	20.817	14	1
sp|P13473|LAMP2_HUMAN	1	3	3	2	44.96	0	11.563	18	1
sp|P13489|RINI_HUMAN	1	15	15	28.2	49.973	0	323.31	154	1
sp|P13639|EF2_HUMAN	1	26	26	26.3	95.337	0	323.31	235	1
sp|P13667|PDIA4_HUMAN	1	19	19	30.5	72.932	0	323.31	175	1
sp|P13674|P4HA1_HUMAN	1	7	7	7.7	61.049	0	15.773	13	1
sp|P13693|TCTP_HUMAN	1	3	3	22.7	19.595	0	124.31	13	1
sp|P13747|HLAE_HUMAN	1	4	2	7.5	40.156	0	3.7991	1	1
sp|P13798|ACPH_HUMAN	1	11	11	5.2	81.224	0	56.433	28	1
sp|P13804|ETFA_HUMAN	1	9	9	36	35.079	0	149.31	132	1
sp|P13807|GYS1_HUMAN	1	6	6	1.5	83.785	0	16.734	15	1
sp|P13861|KAP2_HUMAN;sp|P31323|KAP3_HUMAN	2	10;1	10;1	14.6	45.518	0	45.29	29	1
sp|P13987|CD59_HUMAN	1	1	1	9.4	14.177	0	9.0191	1	1
sp|P13995|MTDC_HUMAN	1	7	7	10	37.895	0	184.58	40	1
sp|P14174|MIF_HUMAN	1	3	3	17.4	12.476	0	29.789	50	1
sp|P14314|GLU2B_HUMAN	1	12	12	24.6	59.425	0	323.31	69	1
sp|P14406|CX7A2_HUMAN	1	2	2	27.7	9.3959	0	50.522	31	1
sp|P14550|AK1A1_HUMAN	1	4	4	6.8	36.573	0	8.4993	12	1
sp|P14618|KPYM_HUMAN;sp|P30613|KPYR_HUMAN	2	22;1	22;1	38	57.936	0	323.31	451	1
sp|P14625|ENPL_HUMAN;sp|Q58FF3|ENPLL_HUMAN	2	27;1	25;1	32.9	92.468	0	323.31	447	1
sp|P14854|CX6B1_HUMAN	1	4	4	20.9	10.192	0	21.477	9	1
sp|P14859|PO2F1_HUMAN;sp|Q9UKI9|PO2F3_HUMAN;sp|P09086|PO2F2_HUMAN	3	5;3;3	5;3;3	3.6	76.471	0	27.89	18	1
sp|P14866|HNRPL_HUMAN	1	10	10	21.1	64.132	0	292.19	70	1
sp|P14868|SYDC_HUMAN	1	15	15	21.6	57.136	0	110.68	89	1
sp|P14923|PLAK_HUMAN	1	16	13	6.2	81.744	0	123.23	53	1
sp|P14927|QCR7_HUMAN	1	2	2	25.2	13.53	0	139.05	26	1
sp|P15121|ALDR_HUMAN	1	4	4	2.2	35.853	0	11.005	9	1
sp|P15151|PVR_HUMAN	1	1	1	2.9	45.302	0	7.6437	25	1
sp|P15153|RAC2_HUMAN	1	3	1	16.7	21.429	0	9.9045	20	1
sp|P15170|ERF3A_HUMAN;sp|Q8IYD1|ERF3B_HUMAN	2	4;1	4;1	3.2	55.755	0	15.895	6	1
sp|P15311|EZRI_HUMAN	1	16	9	25.4	69.412	0	323.31	218	1
sp|P15374|UCHL3_HUMAN	1	5	5	5.7	26.182	0	17.818	7	1
sp|P15531|NDKA_HUMAN	1	6	3	32.2	17.149	0	46.675	225	1
sp|P15559|NQO1_HUMAN	1	3	3	11.3	30.867	0	20.688	11	1
sp|P15586|GNS_HUMAN	1	6	6	8.2	62.081	0	42.654	43	1
sp|P15880|RS2_HUMAN	1	7	7	15.7	31.324	0	49.297	31	1
sp|P15924|DESP_HUMAN	1	27	27	1.4	331.77	0	110.31	51	1
sp|P15927|RFA2_HUMAN	1	3	3	8.1	29.247	0	19.203	21	1
sp|P16070|CD44_HUMAN	1	5	5	5.1	81.537	0	89.332	23	1
sp|P16144|ITB4_HUMAN	1	28	28	9.6	202.16	0	276.22	105	1
sp|P16152|CBR1_HUMAN;sp|O75828|CBR3_HUMAN	2	11;2	11;2	11.2	30.375	0	115.14	72	1
sp|P16278|BGAL_HUMAN;sp|Q6UWU2|GLB1L_HUMAN	2	10;1	10;1	11.7	76.074	0	47.671	42	1
sp|P16333|NCK1_HUMAN	1	4	4	3.7	42.864	0	3.1618	4	1
sp|P16401|H15_HUMAN	1	4	4	16.8	22.58	0	15.798	54	1
sp|P16403|H12_HUMAN	1	3	1	18.3	21.364	0	5.1879	3	1
sp|P16422|EPCAM_HUMAN	1	4	4	8.9	34.932	0	63.339	11	1
sp|P16435|NCPR_HUMAN	1	12	12	8.4	76.689	0	69.567	65	1
sp|P16615|AT2A2_HUMAN;sp|O14983|AT2A1_HUMAN;sp|Q93084|AT2A3_HUMAN	3	16;5;4	16;5;4	5.5	114.76	0	95.256	59	1
sp|P16949|STMN1_HUMAN;sp|Q93045|STMN2_HUMAN	2	4;1	4;1	14.8	17.302	0	24.627	44	1
sp|P16989|YBOX3_HUMAN	1	7	4	14.2	40.089	0	53.036	52	1
sp|P17066|HSP76_HUMAN;sp|P48741|HSP77_HUMAN	2	7;4	2;1	11.7	71.027	0	3.2023	9	1
sp|P17096|HMGA1_HUMAN	1	2	2	15	11.676	0	18.33	13	1
sp|P17174|AATC_HUMAN	1	8	8	18.6	46.247	0	79.404	46	1
sp|P17301|ITA2_HUMAN	1	18	18	6.2	129.29	0	196.45	68	1
sp|P17480|UBF1_HUMAN	1	4	4	1.7	89.405	0	11.535	9	1
sp|P17655|CAN2_HUMAN	1	8	8	12.1	79.994	0	124.5	19	1
sp|P17661|DESM_HUMAN	1	10	6	4.7	53.535	0	40.529	24	1
sp|P17693|HLAG_HUMAN	1	2	1	6.8	38.224	0	4.7525	5	1
sp|P17812|PYRG1_HUMAN	1	8	8	4.7	66.69	0	38.222	27	1
sp|P17813|EGLN_HUMAN	1	4	4	5.2	70.577	0	47.486	28	1
sp|P17844|DDX5_HUMAN	1	18	13	24.4	69.147	0	323.31	234	1
sp|P17931|LEG3_HUMAN	1	5	5	12.8	26.152	0	21.726	48	1
sp|P17980|PRS6A_HUMAN	1	13	13	31.9	49.203	0	148.51	92	1
sp|P17987|TCPA_HUMAN	1	21	21	30.2	60.343	0	318.87	154	1
sp|P18031|PTN1_HUMAN	1	11	11	9.9	49.966	0	93.952	52	1
sp|P18084|ITB5_HUMAN	1	3	3	2.1	88.053	0	23.028	6	1
sp|P18085|ARF4_HUMAN	1	6	3	30	20.511	0	32.362	37	1
sp|P18124|RL7_HUMAN	1	6	6	17.7	29.225	0	32.561	23	1
sp|P18206|VINC_HUMAN	1	33	33	32.2	123.8	0	323.31	279	1
sp|P18583|SON_HUMAN	1	19	19	3.4	263.83	0	105.52	82	1
sp|P18621|RL17_HUMAN	1	2	2	5.4	21.397	0	4.4529	3	1
sp|P18669|PGAM1_HUMAN;sp|Q8N0Y7|PGAM4_HUMAN;sp|P15259|PGAM2_HUMAN	3	5;2;1	5;2;1	22	28.804	0	59.304	29	1
sp|P18754|RCC1_HUMAN	1	5	5	13.1	44.969	0	30.528	22	1
sp|P18859|ATP5J_HUMAN	1	3	3	44.4	12.587	0	190.05	35	1
sp|P19105|ML12A_HUMAN;sp|O14950|ML12B_HUMAN;sp|P24844|MYL9_HUMAN	3	7;7;4	7;7;4	39.8	19.794	0	323.31	107	1
sp|P19338|NUCL_HUMAN	1	15	15	13.5	76.613	0	317.24	129	1
sp|P19367|HXK1_HUMAN;sp|P52790|HXK3_HUMAN	2	16;2	12;0	12.6	102.48	0	93.218	54	1
sp|P19387|RPB3_HUMAN	1	5	5	5.5	31.441	0	14.813	11	1
sp|P19388|RPAB1_HUMAN	1	3	3	8.1	24.551	0	28.605	24	1
sp|P19404|NDUV2_HUMAN	1	8	8	17.7	27.391	0	50.539	43	1
sp|P19827|ITIH1_HUMAN;CON__Q0VCM5	2	4;1	4;1	1.4	101.39	0	12.608	6	1
sp|P20020|AT2B1_HUMAN;sp|Q16720|AT2B3_HUMAN;sp|Q01814|AT2B2_HUMAN	3	10;3;2	5;0;0	5.4	138.75	0	63.834	26	1
sp|P20042|IF2B_HUMAN	1	6	6	9.3	38.388	0	93.892	41	1
sp|P20073|ANXA7_HUMAN	1	8	8	8.6	52.739	0	125.04	47	1
sp|P20290|BTF3_HUMAN	1	4	4	14.1	22.168	0	141.68	20	1
sp|P20339|RAB5A_HUMAN	1	5	3	5.1	23.658	0	6.679	6	1
sp|P20340|RAB6A_HUMAN;sp|Q9NRW1|RAB6B_HUMAN;sp|Q14964|RB39A_HUMAN	3	7;4;1	7;4;1	15.9	23.593	0	108.53	68	1
sp|P20618|PSB1_HUMAN	1	6	6	16.6	26.489	0	106.76	45	1
sp|P20645|MPRD_HUMAN	1	1	1	5.1	30.993	0	55.237	13	1
sp|P20674|COX5A_HUMAN	1	3	3	10	16.762	0	10.542	8	1
sp|P20700|LMNB1_HUMAN	1	19	19	27	66.408	0	323.31	127	1
sp|P20810|ICAL_HUMAN	1	7	7	5.9	76.572	0	98.927	27	1
sp|P20936|RASA1_HUMAN	1	5	5	1.1	116.4	0	5.9155	6	1
sp|P21283|VATC1_HUMAN;sp|Q8NEY4|VATC2_HUMAN	2	7;1	7;1	11.3	43.941	0	18.808	10	1
sp|P21291|CSRP1_HUMAN	1	5	5	12.4	20.567	0	33.824	23	1
sp|P21333|FLNA_HUMAN	1	81	76	33.5	280.74	0	323.31	1015	1
sp|P21589|5NTD_HUMAN	1	16	16	27.2	63.367	0	181.37	132	1
sp|P21796|VDAC1_HUMAN	1	17	17	58	30.772	0	323.31	296	1
sp|P21912|SDHB_HUMAN	1	7	7	15.7	31.629	0	77.92	45	1
sp|P21953|ODBB_HUMAN	1	3	3	7.7	43.122	0	13.519	10	1
sp|P21964|COMT_HUMAN	1	9	9	28.4	30.037	0	139.28	43	1
sp|P21980|TGM2_HUMAN	1	22	22	30.9	77.328	0	323.31	270	1
sp|P22059|OSBP1_HUMAN;sp|Q969R2|OSBP2_HUMAN	2	5;1	5;1	3.7	89.42	0	35.679	8	1
sp|P22061|PIMT_HUMAN	1	4	4	7.5	24.636	0	15.53	11	1
sp|P22087|FBRL_HUMAN	1	4	4	11.8	33.784	0	25.05	12	1
sp|P22102|PUR2_HUMAN	1	19	19	6.9	107.77	0	260.06	56	1
sp|P22234|PUR6_HUMAN	1	16	16	26.6	47.079	0	209.1	155	1
sp|P22307|NLTP_HUMAN	1	7	7	9	58.993	0	95.798	40	1
sp|P22314|UBA1_HUMAN	1	24	24	20.5	117.85	0	242.26	185	1
sp|P22392|NDKB_HUMAN;sp|O60361|NDK8_HUMAN	2	6;3	3;2	38.2	17.298	0	10.496	44	1
sp|P22570|ADRO_HUMAN	1	12	12	2.2	53.836	0	59.613	32	1
sp|P22626|ROA2_HUMAN	1	9	9	28.6	37.429	0	95.895	39	1
sp|P22676|CALB2_HUMAN;sp|P05937|CALB1_HUMAN	2	4;1	4;1	15.9	31.54	0	143.4	25	1
sp|P22694|KAPCB_HUMAN;sp|P17612|KAPCA_HUMAN;sp|P22612|KAPCG_HUMAN	3	2;2;1	2;2;1	5.4	40.622	0	14.352	11	1
sp|P22695|QCR2_HUMAN	1	12	12	21.2	48.442	0	323.31	147	1
sp|P23193|TCEA1_HUMAN	1	5	5	9.3	33.969	0	18.653	15	1
sp|P23229|ITA6_HUMAN	1	18	18	15.4	126.6	0	172.1	66	1
sp|P23246|SFPQ_HUMAN	1	8	8	16.1	76.149	0	157.48	90	1
sp|P23284|PPIB_HUMAN	1	10	10	37	23.742	0	323.31	211	1
sp|P23368|MAOM_HUMAN	1	8	8	4.1	65.443	0	30.182	34	1
sp|P23381|SYWC_HUMAN	1	11	11	17.2	53.165	0	177.92	86	1
sp|P23396|RS3_HUMAN	1	14	14	40.7	26.688	0	290.63	283	1
sp|P23434|GCSH_HUMAN	1	2	2	17.3	18.884	0	20.329	15	1
sp|P23526|SAHH_HUMAN	1	12	12	25.2	47.716	0	79.329	58	1
sp|P23528|COF1_HUMAN	1	6	5	34.3	18.502	0	149.85	91	1
sp|P23588|IF4B_HUMAN	1	2	2	6.5	69.15	0	7.1583	7	1
sp|P23634|AT2B4_HUMAN	1	7	2	3.5	137.92	0	16.647	3	1
sp|P23786|CPT2_HUMAN	1	8	8	1.1	73.776	0	23.776	18	1
sp|P23919|KTHY_HUMAN	1	6	6	9.4	23.819	0	12.932	13	1
sp|P24534|EF1B_HUMAN	1	5	5	24.4	24.763	0	161.44	60	1
sp|P24539|AT5F1_HUMAN	1	3	3	5.9	28.908	0	14.783	6	1
sp|P24666|PPAC_HUMAN	1	3	3	7	18.042	0	13.538	10	1
sp|P24752|THIL_HUMAN	1	13	13	38.2	45.199	0	293.02	233	1
sp|P25205|MCM3_HUMAN	1	16	16	5.3	90.98	0	118.49	78	1
sp|P25325|THTM_HUMAN	1	4	4	17.8	33.178	0	64.981	33	1
sp|P25398|RS12_HUMAN	1	5	5	54.5	14.515	0	169.18	154	1
sp|P25685|DNJB1_HUMAN	1	8	7	16.8	38.044	0	53.446	34	1
sp|P25705|ATPA_HUMAN	1	20	20	28	59.75	0	323.31	289	1
sp|P25786|PSA1_HUMAN	1	9	9	32.7	29.555	0	46.102	47	1
sp|P25787|PSA2_HUMAN	1	7	7	26.9	25.898	0	90.761	53	1
sp|P25788|PSA3_HUMAN	1	3	3	9.4	28.433	0	64.825	23	1
sp|P25789|PSA4_HUMAN	1	6	6	33.7	29.483	0	184.97	74	1
sp|P25815|S100P_HUMAN	1	1	1	10.5	10.4	0.0029615	2.1713	1	1
sp|P26006|ITA3_HUMAN	1	7	7	7.9	116.61	0	96.498	47	1
sp|P26038|MOES_HUMAN	1	13	6	26	67.819	0	60.463	36	1
sp|P26196|DDX6_HUMAN	1	9	9	7.2	54.416	0	24.221	24	1
sp|P26232|CTNA2_HUMAN	1	6	1	7.9	105.31	0	77.626	15	1
sp|P26368|U2AF2_HUMAN	1	9	9	28	53.5	0	149.54	88	1
sp|P26373|RL13_HUMAN	1	4	4	19	24.261	0	73.341	40	1
sp|P26447|S10A4_HUMAN	1	2	2	10.9	11.728	0	6.4029	30	1
sp|P26599|PTBP1_HUMAN	1	14	13	42.9	57.221	0	323.31	295	1
sp|P26639|SYTC_HUMAN	1	11	11	9.1	83.434	0	42.317	58	1
sp|P26640|SYVC_HUMAN	1	15	15	5.5	140.47	0	70.827	32	1
sp|P26641|EF1G_HUMAN	1	11	11	16.5	50.118	0	190.13	114	1
sp|P26885|FKBP2_HUMAN	1	3	3	38	15.649	0	29.675	19	1
sp|P27105|STOM_HUMAN	1	5	5	4.2	31.73	0	30.728	9	1
sp|P27348|1433T_HUMAN	1	11	9	42	27.764	0	323.31	135	1
sp|P27635|RL10_HUMAN	1	3	3	12.6	24.604	0	35.602	7	1
sp|P27694|RFA1_HUMAN	1	7	7	6.5	68.137	0	80.201	18	1
sp|P27695|APEX1_HUMAN	1	5	5	10.7	35.554	0	30.717	9	1
sp|P27701|CD82_HUMAN	1	2	2	10.5	29.625	0	6.8095	5	1
sp|P27708|PYR1_HUMAN	1	30	30	5.7	242.98	0	216.77	102	1
sp|P27797|CALR_HUMAN	1	13	13	44.4	48.141	0	323.31	126	1
sp|P27816|MAP4_HUMAN	1	29	29	23.2	121	0	296.29	305	1
sp|P27824|CALX_HUMAN	1	10	10	16.6	67.567	0	323.31	159	1
sp|P28062|PSB8_HUMAN	1	4	4	4	30.354	0	9.8643	5	1
sp|P28066|PSA5_HUMAN	1	8	8	25.7	26.411	0	312.44	86	1
sp|P28070|PSB4_HUMAN	1	5	5	25	29.204	0	27.415	21	1
sp|P28072|PSB6_HUMAN	1	5	5	4.6	25.357	0	28.219	13	1
sp|P28074|PSB5_HUMAN	1	5	5	3.8	28.48	0	29.615	21	1
sp|P28290|SSFA2_HUMAN	1	12	12	4.1	138.38	0	38.66	35	1
sp|P28331|NDUS1_HUMAN	1	19	19	21.3	79.467	0	237.58	156	1
sp|P28482|MK01_HUMAN	1	8	7	6.4	41.389	0	20.057	14	1
sp|P28676|GRAN_HUMAN	1	3	3	5.1	24.01	0	10.601	20	1
sp|P28838|AMPL_HUMAN	1	13	13	11.6	56.166	0	95.729	75	1
sp|P29144|TPP2_HUMAN	1	13	13	1.1	138.35	0	75.333	23	1
sp|P29317|EPHA2_HUMAN;sp|P54764|EPHA4_HUMAN;sp|Q15375|EPHA7_HUMAN	3	18;1;1	17;0;0	12.8	108.27	0	69.85	87	1
sp|P29323|EPHB2_HUMAN;sp|P54762|EPHB1_HUMAN	2	10;2	9;1	1.2	117.49	0	20.777	12	1
sp|P29353|SHC1_HUMAN;sp|P98077|SHC2_HUMAN;sp|Q6S5L8|SHC4_HUMAN	3	9;1;1	9;1;1	2.2	62.821	0	26.842	17	1
sp|P29373|RABP2_HUMAN	1	5	5	21.7	15.693	0	14.319	10	1
sp|P29401|TKT_HUMAN	1	11	11	19.3	67.877	0	251.72	177	1
sp|P29558|RBMS1_HUMAN;sp|Q6XE24|RBMS3_HUMAN	2	2;1	2;1	3.7	44.505	0	6.0856	3	1
sp|P29590|PML_HUMAN	1	5	5	1	97.55	0	27.701	14	1
sp|P29692|EF1D_HUMAN	1	9	9	29.9	31.121	0	247.76	130	1
sp|P29966|MARCS_HUMAN	1	7	7	26.8	31.554	0	174.95	78	1
sp|P29992|GNA11_HUMAN;sp|O95837|GNA14_HUMAN	2	6;2	4;1	5.3	42.123	0	22.099	17	1
sp|P30040|ERP29_HUMAN	1	7	7	26.1	28.993	0	58.668	81	1
sp|P30041|PRDX6_HUMAN	1	10	10	19.6	25.035	0	64.248	63	1
sp|P30044|PRDX5_HUMAN	1	9	9	50	22.086	0	147.73	252	1
sp|P30046|DOPD_HUMAN;sp|A6NHG4|DDTL_HUMAN	2	1;1	1;1	11	12.712	0.0024913	2.267	1	1
sp|P30048|PRDX3_HUMAN	1	6	6	21.1	27.692	0	190.26	120	1
sp|P30049|ATPD_HUMAN	1	1	1	8.3	17.49	0	13.025	1	1
sp|P30050|RL12_HUMAN	1	6	6	45.5	17.818	0	288.94	80	1
sp|P30084|ECHM_HUMAN	1	10	10	39	31.387	0	229.48	127	1
sp|P30085|KCY_HUMAN	1	2	2	4.1	22.222	0	3.7963	8	1
sp|P30086|PEBP1_HUMAN	1	3	3	10.7	21.057	0	32.512	5	1
sp|P30101|PDIA3_HUMAN	1	16	16	32.1	56.782	0	323.31	204	1
sp|P30153|2AAA_HUMAN;sp|P30154|2AAB_HUMAN	2	16;4	16;4	30.1	65.308	0	309.23	156	1
sp|P30405|PPIF_HUMAN	1	5	5	42	22.04	0	178.46	41	1
sp|P30419|NMT1_HUMAN	1	4	3	2.8	56.806	0	18.178	34	1
sp|P30455|1A36_HUMAN;sp|P30443|1A01_HUMAN;sp|P13746|1A11_HUMAN;sp|P04439|1A03_HUMAN;sp|P16188|1A30_HUMAN;sp|P30512|1A29_HUMAN;sp|P30459|1A74_HUMAN;sp|P10314|1A32_HUMAN	8	10;10;10;10;7;4;4;4	4;4;4;4;3;0;1;1	21.9	40.933	0	272.76	88	1
sp|P30480|1B42_HUMAN;sp|P30460|1B08_HUMAN;sp|P01889|1B07_HUMAN;sp|Q04826|1B40_HUMAN;sp|P30479|1B41_HUMAN;sp|Q95365|1B38_HUMAN;sp|Q29836|1B67_HUMAN;sp|Q29718|1B82_HUMAN;sp|P30475|1B39_HUMAN;sp|P30462|1B14_HUMAN;sp|P18463|1B37_HUMAN;sp|Q31610|1B81_HUMAN;sp|P30486|1B48_HUMAN	13	7;7;7;6;6;5;5;5;5;5;5;5;5	0;0;0;0;0;0;0;0;0;0;0;0;0	11.3	40.332	0	69.058	23	1
sp|P30481|1B44_HUMAN;sp|P30485|1B47_HUMAN;sp|P30461|1B13_HUMAN;sp|P03989|1B27_HUMAN;sp|P30483|1B45_HUMAN;sp|P30488|1B50_HUMAN;sp|P30487|1B49_HUMAN;sp|P30466|1B18_HUMAN	8	6;5;5;5;5;4;4;4	1;0;0;0;1;0;0;0	6.9	40.481	0.00053821	3.0297	7	1
sp|P30519|HMOX2_HUMAN	1	5	5	12.3	36.032	0	50.856	15	1
sp|P30520|PURA2_HUMAN	1	6	6	3.1	50.097	0	18.714	15	1
sp|P30530|UFO_HUMAN	1	11	11	7.4	98.335	0	116	53	1
sp|P30533|AMRP_HUMAN	1	3	3	8.4	41.465	0	7.9652	5	1
sp|P30622|CLIP1_HUMAN;sp|Q9UDT6|CLIP2_HUMAN	2	7;1	7;1	0.6	162.24	0	18.418	11	1
sp|P30626|SORCN_HUMAN	1	7	7	26.8	21.676	0	50.567	49	1
sp|P30740|ILEU_HUMAN	1	4	4	2.4	42.741	0	21.829	11	1
sp|P30837|AL1B1_HUMAN	1	13	13	14.5	57.206	0	143.92	109	1
sp|P30876|RPB2_HUMAN	1	5	5	0.8	133.9	0	8.2978	5	1
sp|P31040|SDHA_HUMAN	1	13	13	20.2	72.691	0	157.14	78	1
sp|P31150|GDIA_HUMAN	1	11	7	15.4	50.582	0	70.827	16	1
sp|P31153|METK2_HUMAN;sp|Q00266|METK1_HUMAN	2	6;2	6;2	6.6	43.66	0	32.397	34	1
sp|P31350|RIR2_HUMAN;sp|Q7LG56|RIR2B_HUMAN	2	6;1	6;1	3.3	44.877	0	32.257	22	1
sp|P31689|DNJA1_HUMAN	1	6	6	12.1	44.868	0	31.599	27	1
sp|P31930|QCR1_HUMAN	1	9	9	16	52.645	0	179.01	59	1
sp|P31937|3HIDH_HUMAN	1	8	8	10.7	35.329	0	100.12	49	1
sp|P31939|PUR9_HUMAN	1	24	24	29.4	64.615	0	290.54	140	1
sp|P31942|HNRH3_HUMAN	1	4	4	14.5	36.926	0	137.66	34	1
sp|P31943|HNRH1_HUMAN	1	12	8	26.7	49.229	0	323.31	170	1
sp|P31946|1433B_HUMAN	1	6	4	36.6	28.082	0	215.43	67	1
sp|P31947|1433S_HUMAN	1	8	6	45.2	27.774	0	48.052	26	1
sp|P31948|STIP1_HUMAN	1	15	15	26.7	62.639	0	259.22	89	1
sp|P31949|S10AB_HUMAN	1	2	2	15.2	11.74	0	18.886	24	1
sp|P32119|PRDX2_HUMAN	1	6	5	23.2	21.892	0	24.651	19	1
sp|P32322|P5CR1_HUMAN	1	7	6	20.1	33.36	0	98.959	38	1
sp|P32969|RL9_HUMAN	1	7	7	29.7	21.863	0	130.9	59	1
sp|P33176|KINH_HUMAN;sp|O60282|KIF5C_HUMAN;sp|Q12840|KIF5A_HUMAN	3	20;4;3	20;4;3	11.1	109.68	0	146.82	51	1
sp|P33240|CSTF2_HUMAN	1	7	4	11.6	60.959	0	40.001	25	1
sp|P33316|DUT_HUMAN	1	2	2	6.7	26.563	0	25.119	8	1
sp|P33527|MRP1_HUMAN	1	11	11	0.6	171.59	0	42.113	14	1
sp|P33991|MCM4_HUMAN	1	14	14	7.3	96.557	0	94.403	46	1
sp|P33992|MCM5_HUMAN	1	14	14	4.1	82.285	0	62.571	43	1
sp|P33993|MCM7_HUMAN	1	12	12	4.5	81.307	0	85.073	55	1
sp|P34896|GLYC_HUMAN	1	2	1	2.9	53.082	0	4.6181	1	1
sp|P34897|GLYM_HUMAN	1	16	15	27.8	55.992	0	264.17	88	1
sp|P34932|HSP74_HUMAN	1	27	25	42.3	94.33	0	323.31	258	1
sp|P35052|GPC1_HUMAN	1	3	3	5.4	61.68	0	5.0704	3	1
sp|P35080|PROF2_HUMAN	1	4	4	30	15.046	0	40.105	16	1
sp|P35221|CTNA1_HUMAN;sp|Q9UI47|CTNA3_HUMAN	2	28;1	23;1	33.4	100.07	0	323.31	174	1
sp|P35222|CTNB1_HUMAN	1	15	12	5.4	85.496	0	52.323	43	1
sp|P35232|PHB_HUMAN	1	12	12	30.5	29.804	0	323.31	242	1
sp|P35241|RADI_HUMAN	1	13	6	17.5	68.563	0	26.077	21	1
sp|P35249|RFC4_HUMAN	1	6	6	13.8	39.681	0	82.433	12	1
sp|P35250|RFC2_HUMAN	1	7	7	13.3	39.157	0	42.893	11	1
sp|P35268|RL22_HUMAN	1	3	3	10.2	14.787	0	12.168	26	1
sp|P35269|T2FA_HUMAN	1	7	7	9.7	58.24	0	56.419	13	1
sp|P35270|SPRE_HUMAN	1	5	5	7.3	28.048	0	36.211	29	1
sp|P35520|CBS_HUMAN	1	11	11	2	60.586	0	41.238	20	1
sp|P35579|MYH9_HUMAN	1	73	63	31.5	226.53	0	323.31	760	1
sp|P35580|MYH10_HUMAN	1	36	24	11.6	229	0	271.65	68	1
sp|P35606|COPB2_HUMAN	1	16	16	9.4	102.49	0	177.06	71	1
sp|P35611|ADDA_HUMAN	1	4	4	3.8	80.954	0	19.855	42	1
sp|P35613|BASI_HUMAN	1	8	8	23.4	42.2	0	178.66	81	1
sp|P35637|FUS_HUMAN	1	5	3	9.7	53.425	0	34.823	37	1
sp|P35658|NU214_HUMAN	1	17	17	1.1	213.62	0	65.669	43	1
sp|P35659|DEK_HUMAN	1	4	4	3.5	42.674	0	27.582	10	1
sp|P35749|MYH11_HUMAN	1	12	4	3.6	227.34	0	4.6406	4	1
sp|P35914|HMGCL_HUMAN	1	6	6	8	34.36	0	69.575	35	1
sp|P35998|PRS7_HUMAN	1	19	19	22.9	48.633	0	196.67	123	1
sp|P36507|MP2K2_HUMAN	1	5	3	6.5	44.424	0	28.795	11	1
sp|P36542|ATPG_HUMAN	1	4	4	6.7	32.996	0	28.731	37	1
sp|P36543|VATE1_HUMAN;sp|Q96A05|VATE2_HUMAN	2	3;1	3;1	5.3	26.145	0	7.5401	6	1
sp|P36551|HEM6_HUMAN	1	8	8	2.9	50.151	0	33.406	42	1
sp|P36578|RL4_HUMAN	1	7	7	8.4	47.697	0	20.989	23	1
sp|P36776|LONM_HUMAN	1	24	24	19.3	106.49	0	271.5	122	1
sp|P36871|PGM1_HUMAN	1	8	8	3.2	61.448	0	49.473	18	1
sp|P36873|PP1G_HUMAN	1	10	1	26.3	36.983	0	92.067	4	1
sp|P36957|ODO2_HUMAN	1	9	9	21.4	48.755	0	231.38	100	1
sp|P37108|SRP14_HUMAN	1	1	1	10.3	14.57	0	4.7275	5	1
sp|P37198|NUP62_HUMAN	1	8	8	15.9	53.254	0	67.332	35	1
sp|P37235|HPCL1_HUMAN;sp|P84074|HPCA_HUMAN;sp|P61601|NCALD_HUMAN	3	6;3;1	6;3;1	15.5	22.313	0	42.524	25	1
sp|P37802|TAGL2_HUMAN	1	9	9	45.2	22.391	0	240.55	170	1
sp|P37837|TALDO_HUMAN	1	5	5	10.7	37.54	0	39.383	36	1
sp|P38117|ETFB_HUMAN	1	13	13	36.5	27.843	0	264.79	147	1
sp|P38432|COIL_HUMAN	1	3	3	5.4	62.608	0	13.118	9	1
sp|P38571|LICH_HUMAN	1	2	2	2.8	45.418	0	9.5278	12	1
sp|P38606|VATA_HUMAN	1	7	7	2.9	68.303	0	80.222	29	1
sp|P38646|GRP75_HUMAN	1	25	25	41.8	73.68	0	323.31	560	1
sp|P38919|IF4A3_HUMAN	1	16	15	27	46.871	0	67.855	60	1
sp|P39019|RS19_HUMAN	1	4	4	27.6	16.06	0	15.374	42	1
sp|P39023|RL3_HUMAN	1	2	2	6	46.108	0	15.413	7	1
sp|P39656|OST48_HUMAN	1	8	8	9.9	50.8	0	61.368	88	1
sp|P39687|AN32A_HUMAN;sp|O95626|AN32D_HUMAN;sp|O43423|AN32C_HUMAN	3	6;2;2	4;2;2	14.9	28.585	0	18.902	10	1
sp|P39748|FEN1_HUMAN	1	8	8	9.7	42.592	0	104.36	39	1
sp|P40121|CAPG_HUMAN	1	6	6	20.4	38.498	0	104.61	23	1
sp|P40222|TXLNA_HUMAN	1	6	6	16.8	61.89	0	67.771	64	1
sp|P40227|TCPZ_HUMAN	1	12	9	20.5	58.024	0	192.29	116	1
sp|P40261|NNMT_HUMAN	1	2	2	6.4	29.574	0	43.73	10	1
sp|P40616|ARL1_HUMAN	1	2	2	6.1	20.417	0	10.692	7	1
sp|P40763|STAT3_HUMAN	1	10	10	8.1	88.067	0	93.198	59	1
sp|P40925|MDHC_HUMAN	1	5	5	13.5	36.426	0	90.932	99	1
sp|P40926|MDHM_HUMAN	1	14	14	56.2	35.503	0	323.31	390	1
sp|P40937|RFC5_HUMAN	1	6	6	10	38.496	0	25.288	21	1
sp|P40938|RFC3_HUMAN	1	3	3	3.9	40.556	0	15.989	5	1
sp|P40939|ECHA_HUMAN	1	26	26	30.7	82.999	0	323.31	177	1
sp|P41091|IF2G_HUMAN;sp|Q2VIR3|IF2GL_HUMAN	2	12;10	12;10	14.4	51.109	0	134.75	61	1
sp|P41250|SYG_HUMAN	1	12	12	22.7	83.165	0	119.64	139	1
sp|P41252|SYIC_HUMAN	1	23	23	7	144.5	0	130.83	72	1
sp|P42126|ECI1_HUMAN	1	2	2	4.3	32.816	0	62.382	32	1
sp|P42166|LAP2A_HUMAN	1	16	9	19	75.491	0	283.9	155	1
sp|P42167|LAP2B_HUMAN	1	14	7	41.6	50.67	0	49.356	17	1
sp|P42224|STAT1_HUMAN	1	15	15	16.4	87.334	0	179.23	64	1
sp|P42226|STAT6_HUMAN	1	6	6	2.1	94.134	0	14.243	9	1
sp|P42285|SK2L2_HUMAN	1	10	10	5.2	117.8	0	45.667	25	1
sp|P42566|EPS15_HUMAN	1	10	10	5.7	98.655	0	41.725	22	1
sp|P42677|RS27_HUMAN;sp|Q71UM5|RS27L_HUMAN	2	2;1	2;1	28.6	9.461	0	6.9956	16	1
sp|P42704|LPPRC_HUMAN	1	52	52	32.2	157.9	0	323.31	596	1
sp|P42765|THIM_HUMAN	1	10	10	16.6	41.924	0	99.551	26	1
sp|P42785|PCP_HUMAN	1	2	2	4.4	55.799	0	3.4231	7	1
sp|P42892|ECE1_HUMAN	1	9	9	14.9	87.163	0	64.374	82	1
sp|P43007|SATT_HUMAN	1	3	3	2.1	55.722	0	40.944	9	1
sp|P43034|LIS1_HUMAN	1	2	2	3.7	46.637	0	23.231	15	1
sp|P43121|MUC18_HUMAN	1	14	14	7.1	71.607	0	166.83	46	1
sp|P43243|MATR3_HUMAN	1	15	15	10.4	94.622	0	323.31	280	1
sp|P43246|MSH2_HUMAN	1	10	10	4.2	104.74	0	56.943	15	1
sp|P43304|GPDM_HUMAN	1	15	15	4	80.852	0	67.083	37	1
sp|P43307|SSRA_HUMAN	1	3	3	17.1	32.235	0	24	17	1
sp|P43487|RANG_HUMAN	1	3	3	5.5	23.31	0	18.198	5	1
sp|P43490|NAMPT_HUMAN	1	10	10	9.4	55.52	0	136	54	1
sp|P43686|PRS6B_HUMAN	1	12	12	30.9	47.366	0	235.53	125	1
sp|P43897|EFTS_HUMAN	1	6	6	17.5	35.39	0	47.625	16	1
sp|P45880|VDAC2_HUMAN	1	11	11	59.9	31.566	0	323.31	209	1
sp|P45954|ACDSB_HUMAN	1	4	4	7.2	47.485	0	29.966	12	1
sp|P45973|CBX5_HUMAN	1	3	3	8.4	22.225	0	10.916	5	1
sp|P45974|UBP5_HUMAN	1	9	9	11.8	95.785	0	85.9	57	1
sp|P46060|RAGP1_HUMAN	1	16	16	32.5	63.541	0	111.04	58	1
sp|P46087|NOP2_HUMAN	1	6	6	2.8	89.301	0	16.339	11	1
sp|P46109|CRKL_HUMAN	1	10	10	20.1	33.777	0	146.97	34	1
sp|P46199|IF2M_HUMAN	1	4	4	2.3	81.316	0	9.41	13	1
sp|P46379|BAG6_HUMAN	1	11	11	4.5	119.41	0	55.9	44	1
sp|P46459|NSF_HUMAN	1	13	13	4.3	82.593	0	68.269	47	1
sp|P46776|RL27A_HUMAN	1	3	3	8.1	16.561	0	52.463	24	1
sp|P46777|RL5_HUMAN	1	8	8	14.5	34.362	0	44.247	23	1
sp|P46778|RL21_HUMAN	1	3	3	11.2	18.565	0	12.585	8	1
sp|P46781|RS9_HUMAN	1	4	4	18.6	22.591	0	89.504	63	1
sp|P46782|RS5_HUMAN	1	5	5	32.4	22.876	0	243.78	99	1
sp|P46783|RS10_HUMAN;sp|Q9NQ39|RS10L_HUMAN	2	4;2	4;2	9.1	18.898	0	20.427	8	1
sp|P46926|GNPI1_HUMAN;sp|Q8TDQ7|GNPI2_HUMAN	2	6;3	6;3	15.9	32.668	0	32.356	28	1
sp|P46934|NEDD4_HUMAN	1	4	4	1.5	149.11	0	24.633	8	1
sp|P46937|YAP1_HUMAN	1	5	5	12.9	54.461	0	24.632	14	1
sp|P46939|UTRO_HUMAN	1	28	28	1.3	394.46	0	164.24	60	1
sp|P46940|IQGA1_HUMAN;sp|Q13576|IQGA2_HUMAN	2	35;1	34;0	16.1	189.25	0	323.31	154	1
sp|P46976|GLYG_HUMAN	1	2	2	4	39.383	0	21.462	12	1
sp|P46977|STT3A_HUMAN	1	4	4	1	80.529	0	10.98	11	1
sp|P47755|CAZA2_HUMAN	1	12	10	19.2	32.949	0	120.86	71	1
sp|P47756|CAPZB_HUMAN	1	10	10	37.5	31.35	0	114.25	29	1
sp|P47813|IF1AX_HUMAN;sp|O14602|IF1AY_HUMAN	2	2;2	2;2	20.8	16.46	0	18.148	13	1
sp|P47895|AL1A3_HUMAN;sp|O94788|AL1A2_HUMAN	2	16;1	16;1	20.5	56.108	0	86.784	78	1
sp|P47897|SYQ_HUMAN	1	17	17	9.3	87.798	0	156.46	82	1
sp|P47914|RL29_HUMAN	1	1	1	9.4	17.752	0	4.8801	1	1
sp|P47985|UCRI_HUMAN;sp|P0C7P4|UCRIL_HUMAN	2	6;3	6;3	15.7	29.668	0	115.78	124	1
sp|P48047|ATPO_HUMAN	1	7	7	22.1	23.277	0	87.55	104	1
sp|P48147|PPCE_HUMAN	1	4	4	2.4	80.699	0	15.763	11	1
sp|P48163|MAOX_HUMAN	1	4	4	5.2	64.149	0	7.0953	7	1
sp|P48444|COPD_HUMAN	1	5	5	6.5	57.21	0	79.457	25	1
sp|P48449|ERG7_HUMAN	1	2	2	1.9	83.308	0	5.2174	4	1
sp|P48556|PSMD8_HUMAN	1	4	4	13.4	39.611	0	28.738	20	1
sp|P48634|PRC2A_HUMAN	1	13	12	1.3	228.86	0	54.236	85	1
sp|P48637|GSHB_HUMAN	1	7	7	1.9	52.384	0	26.905	9	1
sp|P48643|TCPE_HUMAN	1	19	19	35.1	59.67	0	228.23	229	1
sp|P48681|NEST_HUMAN	1	33	33	10.4	177.44	0	249.18	108	1
sp|P48723|HSP13_HUMAN	1	9	9	8.3	51.927	0	32.091	39	1
sp|P48735|IDHP_HUMAN	1	12	11	21.9	50.909	0	123.46	64	1
sp|P48739|PIPNB_HUMAN	1	3	3	7.7	31.54	0	15.132	7	1
sp|P48960|CD97_HUMAN;sp|Q9UHX3|AGRE2_HUMAN	2	8;1	8;1	8.9	91.868	0	161.49	45	1
sp|P49006|MRP_HUMAN	1	3	3	34.9	19.529	0	102.07	31	1
sp|P49023|PAXI_HUMAN	1	5	5	7.4	64.505	0	40.864	14	1
sp|P49189|AL9A1_HUMAN	1	10	10	2.8	53.801	0	35.571	27	1
sp|P49247|RPIA_HUMAN	1	5	5	5.1	33.269	0	38.592	22	1
sp|P49257|LMAN1_HUMAN	1	4	4	2.4	57.548	0	12.073	11	1
sp|P49321|NASP_HUMAN	1	10	10	9.5	85.237	0	151.81	40	1
sp|P49327|FAS_HUMAN	1	39	39	7.1	273.42	0	323.31	198	1
sp|P49368|TCPG_HUMAN	1	16	16	29.2	60.533	0	152.24	110	1
sp|P49406|RM19_HUMAN	1	6	6	3.1	33.535	0	32.444	23	1
sp|P49411|EFTU_HUMAN	1	14	14	29.9	49.541	0	323.31	139	1
sp|P49419|AL7A1_HUMAN	1	14	14	12.8	58.486	0	113.62	85	1
sp|P49458|SRP09_HUMAN	1	3	3	9.3	10.112	0	9.1718	9	1
sp|P49585|PCY1A_HUMAN;sp|Q9Y5K3|PCY1B_HUMAN	2	3;1	3;1	4.6	41.731	0	7.6477	4	1
sp|P49588|SYAC_HUMAN	1	18	18	20	106.81	0	309.14	100	1
sp|P49589|SYCC_HUMAN	1	13	13	9.9	85.472	0	95.281	65	1
sp|P49590|SYHM_HUMAN	1	6	2	3.6	56.888	0.0070738	1.6468	1	1
sp|P49591|SYSC_HUMAN	1	10	10	7.6	58.777	0	118.35	38	1
sp|P49711|CTCF_HUMAN	1	2	2	2.5	82.785	0	16.176	3	1
sp|P49720|PSB3_HUMAN	1	5	5	20	22.949	0	47.957	17	1
sp|P49721|PSB2_HUMAN	1	4	4	16.4	22.836	0	56.374	16	1
sp|P49736|MCM2_HUMAN	1	20	20	9.5	101.89	0	271.4	110	1
sp|P49748|ACADV_HUMAN	1	21	21	26.9	70.389	0	323.31	139	1
sp|P49750|YLPM1_HUMAN	1	11	11	1.1	219.98	0	22.869	22	1
sp|P49755|TMEDA_HUMAN	1	5	5	26	24.976	0	79.856	31	1
sp|P49756|RBM25_HUMAN	1	6	6	6.6	100.18	0	29.217	56	1
sp|P49792|RBP2_HUMAN;sp|P0DJD0|RGPD1_HUMAN;sp|P0DJD1|RGPD2_HUMAN	3	32;6;6	25;0;0	5.8	358.2	0	220.45	75	1
sp|P49821|NDUV1_HUMAN	1	8	8	8.6	50.817	0	65.551	29	1
sp|P49841|GSK3B_HUMAN	1	4	4	5.2	46.744	0	7.4789	5	1
sp|P49902|5NTC_HUMAN	1	4	4	7.5	64.969	0	29.286	20	1
sp|P49903|SPS1_HUMAN	1	6	6	5.4	42.91	0	55.057	19	1
sp|P49915|GUAA_HUMAN	1	14	14	11.4	76.715	0	114.68	60	1
sp|P49916|DNLI3_HUMAN	1	4	4	1.2	112.91	0	10.155	4	1
sp|P50148|GNAQ_HUMAN	1	3	1	3.1	42.142	0	12.117	1	1
sp|P50213|IDH3A_HUMAN	1	6	6	21	39.591	0	52.608	33	1
sp|P50225|ST1A1_HUMAN;sp|P50226|ST1A2_HUMAN	2	6;3	5;3	9.5	34.165	0	21.647	25	1
sp|P50395|GDIB_HUMAN	1	17	13	25.8	50.663	0	197.14	139	1
sp|P50402|EMD_HUMAN	1	5	5	18.1	28.994	0	40.078	44	1
sp|P50416|CPT1A_HUMAN	1	3	3	1.8	88.367	0	6.9358	3	1
sp|P50454|SERPH_HUMAN	1	15	15	32.3	46.44	0	323.31	289	1
sp|P50502|F10A1_HUMAN;sp|Q8NFI4|F10A5_HUMAN;sp|Q8IZP2|ST134_HUMAN	3	6;5;4	6;5;4	8.9	41.331	0	65.307	38	1
sp|P50552|VASP_HUMAN	1	4	4	10.5	39.829	0	58.808	20	1
sp|P50570|DYN2_HUMAN	1	13	10	5.6	98.063	0	96.086	33	1
sp|P50851|LRBA_HUMAN	1	19	19	2.1	319.1	0	85.38	53	1
sp|P50895|BCAM_HUMAN	1	13	13	14.3	67.404	0	173.68	68	1
sp|P50897|PPT1_HUMAN	1	5	5	9.2	34.193	0	78.981	38	1
sp|P50914|RL14_HUMAN	1	3	3	10.2	23.432	0	9.9147	9	1
sp|P50990|TCPQ_HUMAN	1	21	21	18.6	59.62	0	252.1	127	1
sp|P50991|TCPD_HUMAN	1	17	17	28.8	57.924	0	323.31	151	1
sp|P50995|ANX11_HUMAN	1	13	13	18.2	54.389	0	200.05	69	1
sp|P51114|FXR1_HUMAN	1	11	11	17.1	69.72	0	118.82	40	1
sp|P51148|RAB5C_HUMAN	1	6	4	11.6	23.482	0	129.65	63	1
sp|P51149|RAB7A_HUMAN	1	9	9	48.3	23.489	0	282.97	77	1
sp|P51398|RT29_HUMAN	1	10	10	17.1	45.566	0	55.673	62	1
sp|P51532|SMCA4_HUMAN	1	7	4	2.3	184.64	0	32.781	20	1
sp|P51553|IDH3G_HUMAN	1	5	5	5.9	42.794	0	63.295	11	1
sp|P51571|SSRD_HUMAN	1	3	3	13.9	18.998	0	76.208	7	1
sp|P51572|BAP31_HUMAN	1	3	3	13.8	27.991	0	31.348	21	1
sp|P51610|HCFC1_HUMAN	1	19	19	3.4	208.73	0	96.174	74	1
sp|P51648|AL3A2_HUMAN;sp|P48448|AL3B2_HUMAN;sp|P43353|AL3B1_HUMAN	3	8;1;1	7;0;0	6	54.847	0	29.557	26	1
sp|P51649|SSDH_HUMAN	1	4	4	2.6	57.214	0	12.065	4	1
sp|P51659|DHB4_HUMAN	1	19	19	23.5	79.685	0	248.05	129	1
sp|P51665|PSMD7_HUMAN	1	4	4	7.4	37.025	0	9.2363	8	1
sp|P51688|SPHM_HUMAN	1	5	5	4.8	56.695	0	7.4987	9	1
sp|P51809|VAMP7_HUMAN	1	2	2	4.1	24.935	0	21.759	10	1
sp|P51812|KS6A3_HUMAN;sp|Q15349|KS6A2_HUMAN	2	7;1	6;1	3.1	83.735	0	12.32	8	1
sp|P51858|HDGF_HUMAN	1	6	6	30	26.788	0	73.973	23	1
sp|P51970|NDUA8_HUMAN	1	3	3	10.5	20.105	0	15.1	8	1
sp|P52209|6PGD_HUMAN	1	9	9	21.1	53.139	0	97.95	57	1
sp|P52272|HNRPM_HUMAN	1	20	20	29.6	77.515	0	323.31	405	1
sp|P52292|IMA1_HUMAN	1	11	11	17.4	57.861	0	108.06	81	1
sp|P52294|IMA5_HUMAN	1	9	4	7.2	60.221	0	48.268	10	1
sp|P52434|RPAB3_HUMAN	1	3	3	18.7	17.143	0	10.385	11	1
sp|P52565|GDIR1_HUMAN	1	4	4	23.5	23.207	0	110.59	52	1
sp|P52594|AGFG1_HUMAN	1	4	4	9.1	58.259	0	42.382	29	1
sp|P52597|HNRPF_HUMAN	1	9	8	28.4	45.671	0	323.31	158	1
sp|P52630|STAT2_HUMAN	1	4	4	1.5	97.915	0	17.757	5	1
sp|P52655|TF2AA_HUMAN	1	2	2	2.9	41.513	0	20.753	11	1
sp|P52758|UK114_HUMAN	1	4	4	20.4	14.494	0	13.39	9	1
sp|P52788|SPSY_HUMAN	1	3	3	2.2	41.268	0	3.5241	3	1
sp|P52789|HXK2_HUMAN	1	12	9	4.4	102.38	0	23.198	22	1
sp|P52815|RM12_HUMAN	1	5	5	35.4	21.348	0	74.339	116	1
sp|P52907|CAZA1_HUMAN	1	9	7	36.7	32.922	0	113.71	85	1
sp|P53007|TXTP_HUMAN	1	4	4	3.5	34.012	0	22.112	43	1
sp|P53367|ARFP1_HUMAN	1	12	12	15.5	41.738	0	137.04	69	1
sp|P53396|ACLY_HUMAN	1	15	15	5.1	120.84	0	45.664	51	1
sp|P53597|SUCA_HUMAN	1	3	3	6.9	36.249	0	46.299	56	1
sp|P53618|COPB_HUMAN	1	15	15	9	107.14	0	112.47	69	1
sp|P53621|COPA_HUMAN	1	18	18	0.7	138.34	0	114.73	45	1
sp|P53634|CATC_HUMAN	1	5	5	11.7	51.853	0	64.282	25	1
sp|P53675|CLH2_HUMAN	1	12	1	5.5	187.03	0	7.5278	8	1
sp|P53801|PTTG_HUMAN	1	1	1	10	20.324	0	23.098	19	1
sp|P53985|MOT1_HUMAN	1	1	1	4	53.944	0.0022727	2.4136	3	1
sp|P53990|IST1_HUMAN	1	1	1	5.2	39.75	0	16.007	5	1
sp|P53992|SC24C_HUMAN	1	19	19	10.3	118.32	0	73.556	65	1
sp|P53999|TCP4_HUMAN	1	3	3	26	14.395	0	41.301	15	1
sp|P54105|ICLN_HUMAN	1	3	3	5.5	26.215	0	78.265	16	1
sp|P54136|SYRC_HUMAN	1	22	22	15	75.378	0	166.25	95	1
sp|P54577|SYYC_HUMAN	1	14	14	14	59.143	0	46.529	33	1
sp|P54578|UBP14_HUMAN	1	9	9	14.6	56.068	0	93.909	67	1
sp|P54619|AAKG1_HUMAN	1	4	4	3	37.579	0	5.1097	11	1
sp|P54652|HSP72_HUMAN	1	12	5	12.8	70.02	0	26.035	9	1
sp|P54709|AT1B3_HUMAN	1	4	4	6.8	31.512	0	14.162	8	1
sp|P54725|RD23A_HUMAN	1	7	7	4.7	39.609	0	51.513	33	1
sp|P54727|RD23B_HUMAN	1	6	6	30.6	43.171	0	109.17	68	1
sp|P54819|KAD2_HUMAN	1	8	8	28	26.477	0	211.32	61	1
sp|P54886|P5CS_HUMAN	1	14	14	4.9	87.301	0	45.985	57	1
sp|P54920|SNAA_HUMAN;sp|Q9H115|SNAB_HUMAN	2	11;1	11;1	18	33.232	0	304.76	60	1
sp|P55011|S12A2_HUMAN	1	10	10	2.8	131.45	0	67.471	37	1
sp|P55036|PSMD4_HUMAN;sp|A2A3N6|PIPSL_HUMAN	2	10;2	10;2	26	40.736	0	120.85	42	1
sp|P55060|XPO2_HUMAN	1	24	24	22.9	110.42	0	246.38	153	1
sp|P55061|BI1_HUMAN	1	1	1	3.4	26.537	0.0098151	1.3482	2	1
sp|P55072|TERA_HUMAN	1	33	33	43.4	89.321	0	323.31	488	1
sp|P55084|ECHB_HUMAN	1	16	16	22.2	51.294	0	202.82	82	1
sp|P55145|MANF_HUMAN	1	7	7	28.6	20.7	0	62.978	50	1
sp|P55209|NP1L1_HUMAN	1	9	9	11.3	45.374	0	273.97	62	1
sp|P55263|ADK_HUMAN	1	8	8	8.8	40.545	0	67.788	29	1
sp|P55265|DSRAD_HUMAN	1	10	10	1.5	136.06	0	54.268	23	1
sp|P55327|TPD52_HUMAN	1	8	8	48.7	24.327	0	169.39	67	1
sp|P55735|SEC13_HUMAN	1	5	5	11.8	35.54	0	53.026	17	1
sp|P55769|NH2L1_HUMAN	1	4	4	27.3	14.173	0	66.538	40	1
sp|P55786|PSA_HUMAN;sp|A6NEC2|PSAL_HUMAN	2	16;5	16;5	7	103.28	0	132.95	83	1
sp|P55795|HNRH2_HUMAN	1	8	5	25.8	49.263	0	108.92	46	1
sp|P55884|EIF3B_HUMAN	1	15	15	10.9	92.48	0	137.79	130	1
sp|P55957|BID_HUMAN	1	2	2	6.7	21.994	0	8.2941	2	1
sp|P56134|ATPK_HUMAN	1	3	3	11.7	10.918	0	23.505	11	1
sp|P56192|SYMC_HUMAN	1	14	14	13.1	101.11	0	82.951	54	1
sp|P56199|ITA1_HUMAN	1	6	6	2.7	130.85	0	19.059	10	1
sp|P56377|AP1S2_HUMAN	1	3	1	4.5	18.615	0	3.4672	1	1
sp|P56385|ATP5I_HUMAN	1	3	3	14.5	7.9331	0	6.3203	11	1
sp|P56537|IF6_HUMAN	1	6	6	29	26.599	0	194.5	68	1
sp|P56545|CTBP2_HUMAN	1	9	8	7.2	48.944	0	176.22	30	1
sp|P56556|NDUA6_HUMAN	1	1	1	5.2	17.871	0.0061568	1.7064	3	1
sp|P57105|SYJ2B_HUMAN	1	4	4	34.5	15.928	0	53.161	12	1
sp|P57721|PCBP3_HUMAN	1	3	1	9.2	39.465	0.0010571	2.8911	1	1
sp|P57740|NU107_HUMAN	1	14	14	6.4	106.37	0	62.647	36	1
sp|P58107|EPIPL_HUMAN	1	27	25	10.4	555.61	0	168.95	89	1
sp|P58335|ANTR2_HUMAN	1	2	2	2.2	53.666	0	4.4902	3	1
sp|P58546|MTPN_HUMAN	1	3	3	14.4	12.895	0	21.205	22	1
sp|P59998|ARPC4_HUMAN	1	5	5	29.2	19.667	0	76.349	48	1
sp|P60033|CD81_HUMAN	1	3	3	6.8	25.809	0	43.138	20	1
sp|P60059|SC61G_HUMAN	1	2	2	17.6	7.7412	0	11.043	29	1
sp|P60174|TPIS_HUMAN	1	11	11	45.1	30.791	0	323.31	207	1
sp|P60228|EIF3E_HUMAN	1	9	9	11.2	52.22	0	96.069	55	1
sp|P60468|SC61B_HUMAN	1	1	1	10.4	9.9743	0	3.1538	1	1
sp|P60510|PP4C_HUMAN	1	5	4	3.6	35.08	0	89.877	6	1
sp|P60660|MYL6_HUMAN;sp|P14649|MYL6B_HUMAN	2	8;2	8;2	41.1	16.93	0	306.88	111	1
sp|P60709|ACTB_HUMAN	1	21	1	51.5	41.736	0	323.31	91	1
sp|P60842|IF4A1_HUMAN	1	16	12	36.9	46.153	0	218.61	196	1
sp|P60866|RS20_HUMAN	1	3	3	22.7	13.373	0	63.311	52	1
sp|P60891|PRPS1_HUMAN;sp|P21108|PRPS3_HUMAN	2	5;2	2;0	13.5	34.834	0	35.593	30	1
sp|P60900|PSA6_HUMAN	1	6	6	29.7	27.399	0	46.291	41	1
sp|P60953|CDC42_HUMAN	1	3	3	14.7	21.258	0	26.077	43	1
sp|P60981|DEST_HUMAN	1	3	3	22.4	18.506	0	31.68	16	1
sp|P60983|GMFB_HUMAN	1	3	3	11.3	16.713	0	19.55	9	1
sp|P61006|RAB8A_HUMAN	1	2	1	6.8	23.668	0	5.5186	6	1
sp|P61009|SPCS3_HUMAN	1	1	1	6.7	20.313	0	40.556	5	1
sp|P61019|RAB2A_HUMAN	1	7	3	28.3	23.545	0	94.016	43	1
sp|P61020|RAB5B_HUMAN	1	5	3	5.1	23.707	0	15.725	5	1
sp|P61026|RAB10_HUMAN;sp|Q92930|RAB8B_HUMAN;sp|P59190|RAB15_HUMAN	3	6;1;1	5;0;0	17	22.541	0	52.218	29	1
sp|P61086|UBE2K_HUMAN	1	5	5	7.5	22.406	0	27.629	15	1
sp|P61088|UBE2N_HUMAN;sp|Q5JXB2|UE2NL_HUMAN	2	3;2	3;2	11.2	17.138	0	11.092	36	1
sp|P61106|RAB14_HUMAN	1	10	10	31.6	23.897	0	40.003	34	1
sp|P61158|ARP3_HUMAN;sp|Q9C0K3|ARP3C_HUMAN;sp|Q9P1U1|ARP3B_HUMAN	3	11;1;1	11;1;1	9.6	47.371	0	80.534	96	1
sp|P61160|ARP2_HUMAN	1	9	9	9.6	44.76	0	118.68	58	1
sp|P61163|ACTZ_HUMAN	1	4	4	10.4	42.613	0	18.449	19	1
sp|P61165|TM258_HUMAN	1	1	1	10.1	9.0788	0.0005401	3.0665	3	1
sp|P61201|CSN2_HUMAN	1	7	7	5.2	51.596	0	18.121	16	1
sp|P61221|ABCE1_HUMAN	1	6	6	2.8	67.314	0	51.826	39	1
sp|P61224|RAP1B_HUMAN;sp|A6NIZ1|RP1BL_HUMAN	2	8;6	4;3	46.2	20.825	0	101.67	34	1
sp|P61225|RAP2B_HUMAN	1	5	3	14.2	20.504	0	17.127	8	1
sp|P61247|RS3A_HUMAN	1	7	7	23.5	29.945	0	168.81	92	1
sp|P61289|PSME3_HUMAN	1	7	7	28.3	29.506	0	126.21	62	1
sp|P61326|MGN_HUMAN	1	3	1	13.7	17.163	0.0036928	2.1365	2	1
sp|P61353|RL27_HUMAN	1	3	3	23.5	15.798	0	13.367	21	1
sp|P61421|VA0D1_HUMAN	1	5	5	12.3	40.329	0	32.725	14	1
sp|P61513|RL37A_HUMAN	1	1	1	19.6	10.275	0	117.51	40	1
sp|P61586|RHOA_HUMAN	1	5	1	9.8	21.768	0	66.282	34	1
sp|P61604|CH10_HUMAN	1	4	4	23.5	10.932	0	114.49	111	1
sp|P61803|DAD1_HUMAN	1	2	2	19.5	12.497	0	29.67	45	1
sp|P61916|NPC2_HUMAN	1	2	2	10.6	16.57	0	106.12	116	1
sp|P61923|COPZ1_HUMAN	1	5	5	14.1	20.198	0	32.987	22	1
sp|P61962|DCAF7_HUMAN	1	1	1	4.4	38.926	0.0010596	2.913	3	1
sp|P61964|WDR5_HUMAN	1	7	7	11.1	36.588	0	52.654	27	1
sp|P61966|AP1S1_HUMAN;sp|Q96PC3|AP1S3_HUMAN	2	4;1	2;0	14.6	18.733	0	5.9994	4	1
sp|P61970|NTF2_HUMAN	1	5	5	17.3	14.478	0	54.312	10	1
sp|P61978|HNRPK_HUMAN	1	13	13	35.4	50.976	0	323.31	484	1
sp|P61981|1433G_HUMAN	1	5	3	28.7	28.302	0	139.62	64	1
sp|P62070|RRAS2_HUMAN	1	2	1	7.8	23.399	0.0041023	1.9256	1	1
sp|P62072|TIM10_HUMAN	1	1	1	14.4	10.333	0	3.8161	2	1
sp|P62136|PP1A_HUMAN	1	11	2	24.2	37.512	0	19.924	14	1
sp|P62140|PP1B_HUMAN	1	11	4	28.7	37.186	0	138.09	77	1
sp|P62158|CALM_HUMAN;sp|P27482|CALL3_HUMAN	2	8;1	8;1	55.7	16.837	0	323.31	159	1
sp|P62166|NCS1_HUMAN	1	2	2	6.3	21.878	0	6.3843	7	1
sp|P62191|PRS4_HUMAN	1	9	9	16.8	49.184	0	112.68	48	1
sp|P62195|PRS8_HUMAN	1	14	13	28.6	45.626	0	271.27	122	1
sp|P62241|RS8_HUMAN	1	6	6	27.9	24.205	0	177.15	29	1
sp|P62244|RS15A_HUMAN	1	1	1	6.9	14.839	0.0022624	2.3539	5	1
sp|P62249|RS16_HUMAN	1	7	7	32.2	16.445	0	46.935	54	1
sp|P62258|1433E_HUMAN	1	10	8	46.7	29.174	0	244.16	179	1
sp|P62263|RS14_HUMAN	1	5	5	22.5	16.273	0	87.05	78	1
sp|P62266|RS23_HUMAN	1	1	1	7.7	15.807	0	3.3011	17	1
sp|P62269|RS18_HUMAN	1	5	5	19.7	17.718	0	89.106	44	1
sp|P62277|RS13_HUMAN	1	4	4	29.1	17.222	0	31.745	38	1
sp|P62280|RS11_HUMAN	1	3	3	24.7	18.431	0	17.574	14	1
sp|P62304|RUXE_HUMAN	1	3	3	25	10.803	0	66.405	54	1
sp|P62308|RUXG_HUMAN;sp|A8MWD9|RUXGL_HUMAN	2	2;2	2;2	17.1	8.496	0	8.3622	4	1
sp|P62310|LSM3_HUMAN	1	3	3	20.6	11.845	0	11.506	17	1
sp|P62314|SMD1_HUMAN	1	5	5	26.1	13.281	0	173.48	47	1
sp|P62316|SMD2_HUMAN	1	2	2	15.3	13.527	0	27.395	12	1
sp|P62318|SMD3_HUMAN	1	5	5	32.5	13.916	0	130.6	75	1
sp|P62328|TYB4_HUMAN	1	3	3	61.4	5.0526	0	96.525	47	1
sp|P62333|PRS10_HUMAN	1	8	8	18	44.172	0	162.38	39	1
sp|P62424|RL7A_HUMAN	1	7	7	16.2	29.995	0	190.56	78	1
sp|P62491|RB11A_HUMAN	1	5	1	15.3	24.393	0	12.204	20	1
sp|P62495|ERF1_HUMAN	1	9	9	2.5	49.03	0	56.975	43	1
sp|P62633|CNBP_HUMAN	1	2	2	16.4	19.463	0	9.1169	9	1
sp|P62699|YPEL5_HUMAN	1	2	2	9.9	13.841	0	11.519	5	1
sp|P62701|RS4X_HUMAN;sp|Q8TD47|RS4Y2_HUMAN	2	6;1	6;1	15.6	29.597	0	156.34	71	1
sp|P62750|RL23A_HUMAN	1	1	1	8.3	17.695	0	4.0423	8	1
sp|P62753|RS6_HUMAN	1	3	3	15.7	28.68	0	51.034	13	1
sp|P62805|H4_HUMAN	1	9	9	41.7	11.367	0	323.31	373	1
sp|P62820|RAB1A_HUMAN	1	5	2	31.2	22.677	0	66.871	7	1
sp|P62826|RAN_HUMAN	1	5	5	20.8	24.423	0	97.869	26	1
sp|P62829|RL23_HUMAN	1	2	2	25	14.865	0	86.841	42	1
sp|P62834|RAP1A_HUMAN	1	6	2	25	20.987	0	7.3644	6	1
sp|P62841|RS15_HUMAN	1	2	2	21.4	17.04	0	57.652	57	1
sp|P62847|RS24_HUMAN	1	2	2	11.3	15.423	0	7.4735	6	1
sp|P62851|RS25_HUMAN	1	4	4	16.8	13.742	0	66.99	69	1
sp|P62854|RS26_HUMAN	1	1	1	13	13.015	0	9.0853	18	1
sp|P62857|RS28_HUMAN	1	1	1	17.4	7.8409	0	151.91	40	1
sp|P62873|GBB1_HUMAN	1	11	8	29.1	37.377	0	321.04	61	1
sp|P62875|RPAB5_HUMAN	1	1	1	13.4	7.645	0.0041132	1.9577	3	1
sp|P62877|RBX1_HUMAN	1	1	1	16.7	12.274	0	12.922	2	1
sp|P62879|GBB2_HUMAN	1	8	4	14.1	37.331	0	70.321	13	1
sp|P62888|RL30_HUMAN	1	4	4	40.9	12.784	0	231.18	58	1
sp|P62906|RL10A_HUMAN	1	8	8	13.4	24.831	0	180.52	79	1
sp|P62913|RL11_HUMAN	1	3	3	12.9	20.252	0	30.391	42	1
sp|P62917|RL8_HUMAN	1	2	2	17.9	28.024	0	31.024	7	1
sp|P62937|PPIA_HUMAN;sp|Q9Y536|PAL4A_HUMAN	2	12;1	12;1	66.1	18.012	0	323.31	397	1
sp|P62942|FKB1A_HUMAN	1	3	3	12	11.951	0	64.438	6	1
sp|P62979|RS27A_HUMAN;sp|P62987|RL40_HUMAN;sp|P0CG47|UBB_HUMAN;sp|P0CG48|UBC_HUMAN	4	5;4;4;4	5;4;4;4	28.2	17.965	0	258.52	89	1
sp|P62995|TRA2B_HUMAN	1	2	2	5.6	33.665	0	7.9866	6	1
sp|P63000|RAC1_HUMAN;sp|P60763|RAC3_HUMAN	2	4;3	2;1	14.1	21.45	0	19.703	20	1
sp|P63010|AP2B1_HUMAN	1	27	17	20.2	104.55	0	250.11	197	1
sp|P63092|GNAS2_HUMAN;sp|Q5JWF2|GNAS1_HUMAN;sp|P38405|GNAL_HUMAN;sp|P11488|GNAT1_HUMAN;sp|P19087|GNAT2_HUMAN;sp|A8MTJ3|GNAT3_HUMAN	6	8;8;2;1;1;1	7;7;1;0;0;0	15	45.664	0	51.47	11	1
sp|P63096|GNAI1_HUMAN;sp|P09471|GNAO_HUMAN	2	5;2	2;0	13.8	40.361	0	12.344	11	1
sp|P63104|1433Z_HUMAN	1	10	8	47.3	27.745	0	323.31	293	1
sp|P63162|RSMN_HUMAN;sp|P14678|RSMB_HUMAN	2	4;4	4;4	2.9	24.614	0	10.14	10	1
sp|P63165|SUMO1_HUMAN	1	1	1	11.9	11.557	0.00053691	3.0129	4	1
sp|P63167|DYL1_HUMAN	1	1	1	24.7	10.366	0	26.518	9	1
sp|P63172|DYLT1_HUMAN	1	4	4	56.6	12.452	0	66.254	29	1
sp|P63208|SKP1_HUMAN	1	2	2	8	18.658	0	46.003	26	1
sp|P63220|RS21_HUMAN	1	5	5	57.8	9.1113	0	144.12	62	1
sp|P63241|IF5A1_HUMAN;sp|Q6IS14|IF5AL_HUMAN;sp|Q9GZV4|IF5A2_HUMAN	3	8;5;3	8;5;3	45.5	16.832	0	72.117	70	1
sp|P63244|GBLP_HUMAN	1	14	14	40.4	35.076	0	306.4	135	1
sp|P63261|ACTG_HUMAN;sp|A5A3E0|POTEF_HUMAN	2	22;6	2;0	51.5	41.792	0	323.31	1110	1
sp|P63267|ACTH_HUMAN;sp|P62736|ACTA_HUMAN	2	13;13	1;1	27.1	41.876	0	3.3617	7	1
sp|P63313|TYB10_HUMAN	1	1	1	31.8	5.0256	0	106.81	55	1
sp|P67775|PP2AA_HUMAN;sp|P62714|PP2AB_HUMAN	2	8;6	7;5	19.1	35.594	0	102.96	37	1
sp|P67809|YBOX1_HUMAN;sp|Q9Y2T7|YBOX2_HUMAN	2	8;3	5;0	25.6	35.924	0	139.23	26	1
sp|P67870|CSK2B_HUMAN	1	1	1	10.7	24.942	0	3.6681	2	1
sp|P67936|TPM4_HUMAN	1	4	2	5.6	28.521	0	27.687	6	1
sp|P68032|ACTC_HUMAN;sp|P68133|ACTS_HUMAN	2	14;12	1;1	27.1	42.019	0	167.46	83	1
sp|P68104|EF1A1_HUMAN;sp|Q5VTE0|EF1A3_HUMAN	2	14;13	6;6	41.8	50.14	0	323.31	334	1
sp|P68363|TBA1B_HUMAN	1	18	0	51.2	50.151	0	323.31	664	1
sp|P68366|TBA4A_HUMAN;sp|Q9H853|TBA4B_HUMAN	2	15;1	4;0	38.6	49.924	0	15.822	14	1
sp|P68371|TBB4B_HUMAN	1	16	2	39.1	49.83	0	323.31	736	1
sp|P68402|PA1B2_HUMAN	1	2	2	8.3	25.569	0.0018046	2.6527	1	1
sp|P68871|HBB_HUMAN;sp|P02042|HBD_HUMAN	2	4;2	3;1	12.9	15.998	0	17.807	15	1
sp|P69905|HBA_HUMAN	1	4	2	16.9	15.257	0	8.1993	2	1
sp|P78310|CXAR_HUMAN	1	6	6	10.1	40.029	0	20.408	6	1
sp|P78330|SERB_HUMAN	1	5	5	9.8	25.007	0	15.351	31	1
sp|P78344|IF4G2_HUMAN	1	15	15	11.7	102.36	0	110.35	88	1
sp|P78347|GTF2I_HUMAN	1	16	16	7.4	112.42	0	68.308	35	1
sp|P78371|TCPB_HUMAN	1	20	20	43.6	57.488	0	323.31	320	1
sp|P78527|PRKDC_HUMAN	1	67	67	8.1	469.08	0	323.31	260	1
sp|P78536|ADA17_HUMAN	1	3	3	2.7	93.02	0	9.1541	16	1
sp|P80188|NGAL_HUMAN	1	7	7	18.2	22.588	0	89.62	73	1
sp|P80217|IN35_HUMAN	1	2	2	2.8	31.546	0	5.7208	8	1
sp|P80303|NUCB2_HUMAN	1	5	5	2.1	50.195	0	20.845	18	1
sp|P80723|BASP1_HUMAN	1	4	4	35.7	22.693	0	96.759	94	1
sp|P82650|RT22_HUMAN	1	8	8	14.2	41.28	0	84.949	77	1
sp|P82663|RT25_HUMAN	1	2	2	9.8	20.116	0	6.3437	11	1
sp|P82664|RT10_HUMAN	1	3	3	9	22.999	0	8.6209	4	1
sp|P82673|RT35_HUMAN	1	5	5	8.4	36.844	0	54.52	29	1
sp|P82912|RT11_HUMAN	1	4	4	14.9	20.616	0	40.661	6	1
sp|P82921|RT21_HUMAN	1	1	1	16.1	10.741	0	3.5736	1	1
sp|P82930|RT34_HUMAN	1	2	2	3.7	25.65	0	11.092	6	1
sp|P82979|SARNP_HUMAN	1	3	3	9	23.671	0	23.614	35	1
sp|P83731|RL24_HUMAN	1	4	4	14.6	17.779	0	11.561	16	1
sp|P84077|ARF1_HUMAN;sp|P61204|ARF3_HUMAN	2	6;6	2;2	11.6	20.697	0	16.449	20	1
sp|P84085|ARF5_HUMAN	1	5	1	11.7	20.529	0.0036621	2.0549	1	1
sp|P84090|ERH_HUMAN	1	3	3	26.9	12.259	0	323.31	103	1
sp|P84095|RHOG_HUMAN	1	1	1	9.9	21.308	0	4.3927	3	1
sp|P84098|RL19_HUMAN	1	1	1	8.7	23.466	0	39.301	10	1
sp|P84157|MXRA7_HUMAN	1	1	1	14.2	21.466	0	28.518	4	1
sp|P85037|FOXK1_HUMAN	1	8	8	6.4	75.456	0	51.636	13	1
sp|P98194|AT2C1_HUMAN	1	4	4	1.5	100.58	0	10.621	9	1
sp|P99999|CYC_HUMAN;CON__P62894	2	3;1	3;1	18.1	11.749	0	5.8903	24	1
sp|Q00059|TFAM_HUMAN	1	3	3	9.3	29.096	0	8.5065	5	1
sp|Q00169|PIPNA_HUMAN	1	1	1	8.5	31.806	0	11.769	4	1
sp|Q00325|MPCP_HUMAN	1	8	8	23.5	40.094	0	37.075	127	1
sp|Q00341|VIGLN_HUMAN	1	13	13	2.7	141.45	0	54.707	31	1
sp|Q00577|PURA_HUMAN	1	3	3	7.1	34.91	0	22.269	11	1
sp|Q00610|CLH1_HUMAN	1	44	33	26	191.61	0	323.31	446	1
sp|Q00613|HSF1_HUMAN	1	3	3	4	57.26	0	8.6402	3	1
sp|Q00796|DHSO_HUMAN	1	7	7	7	38.324	0	33.24	19	1
sp|Q00839|HNRPU_HUMAN	1	9	9	11.4	90.583	0	314.46	103	1
sp|Q01081|U2AF1_HUMAN;sp|Q8WU68|U2AF4_HUMAN	2	5;3	5;3	9.2	27.872	0	39.052	33	1
sp|Q01082|SPTB2_HUMAN	1	66	62	21.1	274.61	0	323.31	484	1
sp|Q01085|TIAR_HUMAN	1	5	3	2.4	41.59	0	21.095	8	1
sp|Q01105|SET_HUMAN;sp|P0DME0|SETLP_HUMAN	2	6;3	6;3	18.3	33.488	0	87.687	82	1
sp|Q01469|FABP5_HUMAN;sp|A8MUU1|FB5L3_HUMAN	2	6;2	6;2	37	15.164	0	109.13	42	1
sp|Q01518|CAP1_HUMAN	1	10	10	23.6	51.901	0	101.03	79	1
sp|Q01628|IFM3_HUMAN;sp|P13164|IFM1_HUMAN;sp|Q01629|IFM2_HUMAN	3	2;1;1	2;1;1	12	14.632	0	17.849	66	1
sp|Q01650|LAT1_HUMAN;sp|Q9UM01|YLAT1_HUMAN	2	4;1	3;0	8.1	55.01	0	121.52	53	1
sp|Q01804|OTUD4_HUMAN	1	5	5	2.5	124.04	0	11.696	5	1
sp|Q01813|PFKAP_HUMAN	1	15	13	15.9	85.595	0	177.63	95	1
sp|Q01844|EWS_HUMAN	1	5	5	4.3	68.477	0	59.952	15	1
sp|Q02218|ODO1_HUMAN;sp|Q9ULD0|OGDHL_HUMAN	2	14;3	14;3	4	115.93	0	79.841	54	1
sp|Q02338|BDH_HUMAN	1	7	7	5	38.157	0	25.916	17	1
sp|Q02543|RL18A_HUMAN	1	3	3	15.3	20.762	0	36.31	23	1
sp|Q02750|MP2K1_HUMAN	1	4	2	3.1	43.439	0	4.2633	2	1
sp|Q02790|FKBP4_HUMAN	1	9	9	19.2	51.804	0	160.92	77	1
sp|Q02809|PLOD1_HUMAN	1	13	13	12.1	83.549	0	164.12	88	1
sp|Q02818|NUCB1_HUMAN	1	9	9	6.3	53.879	0	103.83	22	1
sp|Q02978|M2OM_HUMAN	1	9	9	15.3	34.061	0	141.14	54	1
sp|Q03001|DYST_HUMAN	1	31	31	0.7	860.65	0	79.711	45	1
sp|Q03169|TNAP2_HUMAN	1	7	7	4	72.66	0	34.742	14	1
sp|Q03252|LMNB2_HUMAN	1	14	14	16	67.688	0	226.58	80	1
sp|Q04206|TF65_HUMAN	1	4	4	2.9	60.218	0	9.4407	11	1
sp|Q04323|UBXN1_HUMAN	1	3	3	4	33.325	0	11.217	10	1
sp|Q04637|IF4G1_HUMAN	1	25	22	14.5	175.49	0	323.31	282	1
sp|Q04721|NOTC2_HUMAN	1	9	9	0.5	265.4	0	18.303	22	1
sp|Q04760|LGUL_HUMAN	1	5	5	27.2	20.777	0	41.849	48	1
sp|Q04837|SSBP_HUMAN	1	3	3	20.3	17.259	0	13.843	7	1
sp|Q04917|1433F_HUMAN	1	6	4	26.8	28.218	0	147.73	22	1
sp|Q04941|PLP2_HUMAN	1	1	1	8.6	16.691	0	3.4293	2	1
sp|Q05048|CSTF1_HUMAN	1	5	5	3.5	48.357	0	18.464	16	1
sp|Q05193|DYN1_HUMAN	1	7	4	6	97.407	0	21.008	14	1
sp|Q05519|SRS11_HUMAN	1	3	3	3.5	53.542	0	11.855	30	1
sp|Q05639|EF1A2_HUMAN	1	13	5	20.1	50.47	0	58.942	18	1
sp|Q05707|COEA1_HUMAN	1	2	2	0.8	193.51	0	6.0251	3	1
sp|Q05D32|CTSL2_HUMAN	1	4	4	1.5	52.998	0	6.7454	4	1
sp|Q06203|PUR1_HUMAN	1	5	5	2.7	57.398	0	22.312	7	1
sp|Q06210|GFPT1_HUMAN;sp|O94808|GFPT2_HUMAN	2	13;1	13;1	7.4	78.806	0	130.53	56	1
sp|Q06323|PSME1_HUMAN	1	11	11	30.9	28.723	0	152.41	58	1
sp|Q06481|APLP2_HUMAN	1	6	6	3	86.955	0	16.144	11	1
sp|Q06546|GABPA_HUMAN	1	3	3	2.9	51.295	0	16.946	3	1
sp|Q06587|RING1_HUMAN;sp|Q99496|RING2_HUMAN	2	2;1	2;1	7.4	42.429	0	4.54	6	1
sp|Q06830|PRDX1_HUMAN	1	10	8	44.2	22.11	0	323.31	260	1
sp|Q07020|RL18_HUMAN	1	4	4	11.7	21.634	0	88.127	16	1
sp|Q07021|C1QBP_HUMAN	1	5	5	36.2	31.362	0	154.88	78	1
sp|Q07065|CKAP4_HUMAN	1	19	19	32.9	66.022	0	323.31	160	1
sp|Q07157|ZO1_HUMAN	1	19	19	5	195.46	0	99.547	58	1
sp|Q07666|KHDR1_HUMAN;sp|Q5VWX1|KHDR2_HUMAN	2	4;1	3;0	4.5	48.227	0	7.2902	8	1
sp|Q07866|KLC1_HUMAN	1	8	5	8.2	65.309	0	52.875	33	1
sp|Q07955|SRSF1_HUMAN	1	5	4	10.1	27.744	0	51.71	47	1
sp|Q07960|RHG01_HUMAN	1	4	4	8.7	50.435	0	25.493	10	1
sp|Q08174|PCDH1_HUMAN	1	5	5	1.1	114.74	0	15.106	9	1
sp|Q08209|PP2BA_HUMAN;sp|P16298|PP2BB_HUMAN	2	3;1	3;1	2.3	58.687	0	15.967	18	1
sp|Q08211|DHX9_HUMAN	1	21	21	5.9	140.96	0	162.07	107	1
sp|Q08378|GOGA3_HUMAN	1	12	12	1.6	167.35	0	44.385	17	1
sp|Q08379|GOGA2_HUMAN	1	8	8	2.2	113.08	0	22.45	9	1
sp|Q08380|LG3BP_HUMAN	1	9	9	13	65.33	0	117.35	88	1
sp|Q08722|CD47_HUMAN	1	2	2	5.3	35.213	0	4.577	10	1
sp|Q08752|PPID_HUMAN	1	4	4	6.2	40.763	0	24.491	6	1
sp|Q08945|SSRP1_HUMAN	1	13	13	14.2	81.074	0	111.9	67	1
sp|Q08J23|NSUN2_HUMAN	1	17	17	15.6	86.47	0	79.111	43	1
sp|Q09028|RBBP4_HUMAN	1	6	2	6.8	47.655	0	101.42	60	1
sp|Q09666|AHNK_HUMAN	1	182	182	39.7	629.09	0	323.31	1886	1
sp|Q0D2H9|GOG8D_HUMAN;sp|Q08AF8|GOG8F_HUMAN;sp|A6NN73|GOG8C_HUMAN	3	1;1;1	1;1;1	2.3	48.422	0.0092081	1.4339	1	1
sp|Q10567|AP1B1_HUMAN	1	22	12	13.8	104.64	0	58.309	42	1
sp|Q10570|CPSF1_HUMAN	1	10	10	2.3	160.88	0	46.498	20	1
sp|Q11201|SIA4A_HUMAN	1	1	1	3.8	39.075	0	3.1713	1	1
sp|Q12765|SCRN1_HUMAN	1	4	4	3.9	46.382	0	16.973	20	1
sp|Q12792|TWF1_HUMAN	1	3	3	3.7	40.282	0	33.722	17	1
sp|Q12797|ASPH_HUMAN	1	12	12	14.6	85.862	0	119.94	107	1
sp|Q12800|TFCP2_HUMAN	1	3	3	2.4	57.255	0	11.46	8	1
sp|Q12830|BPTF_HUMAN	1	3	3	0.4	338.26	0	13.956	5	1
sp|Q12846|STX4_HUMAN	1	5	5	6.4	34.18	0	60.194	7	1
sp|Q12849|GRSF1_HUMAN	1	6	6	1.7	53.126	0	22.683	8	1
sp|Q12874|SF3A3_HUMAN	1	13	13	13.6	58.848	0	258.05	71	1
sp|Q12888|TP53B_HUMAN	1	16	16	1.7	213.57	0	69.071	19	1
sp|Q12904|AIMP1_HUMAN	1	9	9	8	34.352	0	168.42	31	1
sp|Q12905|ILF2_HUMAN	1	13	13	35.9	43.062	0	284.75	185	1
sp|Q12906|ILF3_HUMAN	1	10	10	4.6	95.337	0	43.327	24	1
sp|Q12913|PTPRJ_HUMAN	1	8	8	1.9	145.94	0	22.415	23	1
sp|Q12931|TRAP1_HUMAN	1	16	16	18.3	80.109	0	227.51	100	1
sp|Q12959|DLG1_HUMAN;sp|Q15700|DLG2_HUMAN;sp|P78352|DLG4_HUMAN	3	13;2;1	13;2;1	4.6	100.45	0	82.879	58	1
sp|Q12979|ABR_HUMAN	1	1	1	2.4	97.597	0.0036585	2.0458	1	1
sp|Q12981|SEC20_HUMAN	1	2	2	13.2	26.132	0.0061626	1.7148	4	1
sp|Q12996|CSTF3_HUMAN	1	9	9	5.7	82.921	0	34.557	30	1
sp|Q13011|ECH1_HUMAN	1	9	9	18.3	35.816	0	323.31	123	1
sp|Q13043|STK4_HUMAN	1	3	1	2.9	55.63	0.0036541	2.0331	2	1
sp|Q13045|FLII_HUMAN	1	13	13	4.2	144.75	0	72.437	40	1
sp|Q13057|COASY_HUMAN	1	6	6	4.1	62.328	0	12.503	14	1
sp|Q13084|RM28_HUMAN	1	3	3	9	30.156	0	28.791	23	1
sp|Q13085|ACACA_HUMAN	1	33	28	5.2	265.55	0	117.83	95	1
sp|Q13098|CSN1_HUMAN	1	4	4	5.7	55.536	0	17.781	13	1
sp|Q13123|RED_HUMAN	1	2	2	1.4	65.601	0.0017903	2.5748	2	1
sp|Q13144|EI2BE_HUMAN	1	4	4	2.6	80.379	0	37.753	14	1
sp|Q13148|TADBP_HUMAN	1	4	4	15.9	44.739	0	54.206	38	1
sp|Q13151|ROA0_HUMAN	1	3	3	2.3	30.84	0	27.702	7	1
sp|Q13155|AIMP2_HUMAN	1	5	5	19.1	35.348	0	45.79	14	1
sp|Q13158|FADD_HUMAN	1	2	2	8.7	23.279	0.0088065	1.4985	3	1
sp|Q13162|PRDX4_HUMAN	1	7	6	10.7	30.54	0	34.029	22	1
sp|Q13177|PAK2_HUMAN;sp|O75914|PAK3_HUMAN	2	16;5	13;3	25	58.042	0	158.42	91	1
sp|Q13185|CBX3_HUMAN	1	7	6	38.3	20.811	0	85.192	54	1
sp|Q13188|STK3_HUMAN	1	8	6	7.3	56.3	0	26.668	25	1
sp|Q13200|PSMD2_HUMAN	1	17	17	18.1	100.2	0	173.28	149	1
sp|Q13217|DNJC3_HUMAN	1	4	4	2	57.579	0	26.618	7	1
sp|Q13242|SRSF9_HUMAN	1	6	5	3.2	25.542	0	10.933	13	1
sp|Q13243|SRSF5_HUMAN	1	2	1	3.3	31.263	0	5.3021	2	1
sp|Q13247|SRSF6_HUMAN;sp|Q08170|SRSF4_HUMAN	2	3;2	2;1	9.9	39.586	0	8.1235	6	1
sp|Q13263|TIF1B_HUMAN	1	20	20	38.9	88.549	0	323.31	187	1
sp|Q13268|DHRS2_HUMAN	1	6	6	11.8	29.926	0	152.1	70	1
sp|Q13283|G3BP1_HUMAN	1	12	11	26.6	52.164	0	181.01	154	1
sp|Q13310|PABP4_HUMAN	1	11	6	9.8	70.782	0	26.865	47	1
sp|Q13347|EIF3I_HUMAN	1	5	5	11.7	36.501	0	64.584	29	1
sp|Q13363|CTBP1_HUMAN	1	6	5	9.1	47.535	0	168.67	21	1
sp|Q13404|UB2V1_HUMAN	1	4	2	21.1	16.495	0	17	13	1
sp|Q13405|RM49_HUMAN	1	3	3	7.2	19.198	0	50.993	31	1
sp|Q13409|DC1I2_HUMAN	1	6	6	2.4	71.456	0	72.814	9	1
sp|Q13423|NNTM_HUMAN	1	13	13	5	113.89	0	89.287	72	1
sp|Q13425|SNTB2_HUMAN;sp|Q13424|SNTA1_HUMAN	2	3;1	2;0	1.3	57.949	0	5.6114	8	1
sp|Q13428|TCOF_HUMAN	1	6	6	4.1	152.1	0	25.529	28	1
sp|Q13435|SF3B2_HUMAN	1	17	17	15.2	100.23	0	157.62	72	1
sp|Q13439|GOGA4_HUMAN	1	12	12	1.7	261.14	0	31.71	16	1
sp|Q13442|HAP28_HUMAN	1	2	2	14.4	20.63	0	25.394	3	1
sp|Q13451|FKBP5_HUMAN	1	3	3	4.4	51.212	0	10.244	3	1
sp|Q13464|ROCK1_HUMAN	1	5	2	0.7	158.17	0.0015508	2.68	2	1
sp|Q13492|PICAL_HUMAN	1	9	7	17	70.754	0	81.729	55	1
sp|Q13501|SQSTM_HUMAN	1	10	10	28.4	47.687	0	176.78	43	1
sp|Q13505|MTX1_HUMAN	1	2	2	3.2	51.476	0	12.487	15	1
sp|Q13509|TBB3_HUMAN	1	12	2	31.1	50.432	0	29.338	33	1
sp|Q13547|HDAC1_HUMAN	1	9	7	16.8	55.102	0	160.52	22	1
sp|Q13557|KCC2D_HUMAN;sp|Q9UQM7|KCC2A_HUMAN	2	6;3	3;0	3.8	56.369	0	27.931	14	1
sp|Q13561|DCTN2_HUMAN	1	11	11	22.7	44.23	0	87.466	39	1
sp|Q13586|STIM1_HUMAN	1	5	5	4.8	77.422	0	16.47	12	1
sp|Q13596|SNX1_HUMAN	1	8	6	4	59.069	0	33.505	29	1
sp|Q13620|CUL4B_HUMAN	1	9	6	1.4	103.98	0	20.669	14	1
sp|Q13636|RAB31_HUMAN	1	1	1	7.2	21.569	0	4.1688	3	1
sp|Q13642|FHL1_HUMAN	1	4	4	15.5	36.263	0	24.006	30	1
sp|Q13643|FHL3_HUMAN	1	2	2	6.1	31.192	0.0079569	1.5768	0	1
sp|Q13671|RIN1_HUMAN	1	5	5	1.4	84.098	0	10.839	14	1
sp|Q13724|MOGS_HUMAN	1	9	9	3.9	91.916	0	94.66	46	1
sp|Q13740|CD166_HUMAN	1	9	9	18.9	65.102	0	104.59	45	1
sp|Q13769|THOC5_HUMAN	1	4	4	5.4	78.507	0	18.437	5	1
sp|Q13795|ARFRP_HUMAN	1	2	2	5	22.614	0	6.3564	2	1
sp|Q13813|SPTN1_HUMAN	1	87	87	27.8	284.54	0	323.31	503	1
sp|Q13838|DX39B_HUMAN	1	10	4	13.8	48.991	0	123.66	71	1
sp|Q13884|SNTB1_HUMAN	1	5	4	1.3	58.06	0	16.136	6	1
sp|Q13895|BYST_HUMAN	1	7	7	3.4	49.601	0	11.7	11	1
sp|Q13948|CASP_HUMAN;sp|O14529|CUX2_HUMAN	2	7;1	2;1	1.6	77.454	0	59.851	26	1
sp|Q14008|CKAP5_HUMAN	1	20	20	1.3	225.49	0	84.286	45	1
sp|Q14019|COTL1_HUMAN	1	3	3	24.6	15.945	0	52.15	14	1
sp|Q14061|COX17_HUMAN	1	1	1	25.4	6.9151	0	22.039	2	1
sp|Q14103|HNRPD_HUMAN	1	4	4	6.8	38.434	0	154.96	83	1
sp|Q14108|SCRB2_HUMAN	1	5	5	8.4	54.29	0	34.96	19	1
sp|Q14126|DSG2_HUMAN	1	16	16	9.9	122.29	0	94.093	49	1
sp|Q14137|BOP1_HUMAN	1	6	6	2.8	83.629	0	16.736	14	1
sp|Q14139|UBE4A_HUMAN	1	9	9	1.1	122.56	0	29.989	24	1
sp|Q14141|SEPT6_HUMAN	1	7	5	4.1	49.716	0	87.101	32	1
sp|Q14151|SAFB2_HUMAN	1	8	3	3.4	107.47	0	14.234	18	1
sp|Q14152|EIF3A_HUMAN	1	12	12	5.1	166.57	0	45.796	49	1
sp|Q14157|UBP2L_HUMAN	1	13	13	6.7	114.53	0	253.87	68	1
sp|Q14160|SCRIB_HUMAN	1	16	14	4.4	174.88	0	59.606	42	1
sp|Q14165|MLEC_HUMAN	1	6	6	2.4	32.233	0	27.363	26	1
sp|Q14166|TTL12_HUMAN	1	4	4	4.2	74.403	0	21.023	9	1
sp|Q14192|FHL2_HUMAN	1	4	4	11.5	32.193	0	16.45	7	1
sp|Q14195|DPYL3_HUMAN;sp|Q16555|DPYL2_HUMAN;sp|Q14194|DPYL1_HUMAN	3	6;1;1	6;1;1	1.8	61.963	0	14.901	10	1
sp|Q14204|DYHC1_HUMAN	1	77	77	6.7	532.4	0	323.31	256	1
sp|Q14232|EI2BA_HUMAN	1	4	4	3.3	33.712	0	19.074	18	1
sp|Q14240|IF4A2_HUMAN	1	6	2	10.1	46.402	0	15.872	21	1
sp|Q14247|SRC8_HUMAN	1	11	11	21.5	61.585	0	208.13	49	1
sp|Q14254|FLOT2_HUMAN	1	10	10	16.1	47.064	0	37.997	19	1
sp|Q14257|RCN2_HUMAN	1	4	4	18.3	36.876	0	112.15	29	1
sp|Q14258|TRI25_HUMAN	1	17	17	19.4	70.973	0	153.43	101	1
sp|Q14315|FLNC_HUMAN	1	42	35	10.4	291.02	0	323.31	221	1
sp|Q14318|FKBP8_HUMAN	1	6	6	7.3	44.561	0	67.476	25	1
sp|Q14376|GALE_HUMAN	1	10	10	8	38.281	0	72.422	37	1
sp|Q14444|CAPR1_HUMAN	1	7	7	15	78.365	0	146.95	123	1
sp|Q14498|RBM39_HUMAN;sp|Q86U06|RBM23_HUMAN	2	10;1	10;1	7.5	59.379	0	71.941	33	1
sp|Q14566|MCM6_HUMAN	1	13	13	5.6	92.888	0	144.47	62	1
sp|Q14624|ITIH4_HUMAN	1	2	2	2.4	103.36	0	12.671	16	1
sp|Q14651|PLSI_HUMAN	1	8	5	7.5	70.253	0	37.792	23	1
sp|Q14677|EPN4_HUMAN	1	7	7	1.8	68.259	0	44.091	30	1
sp|Q14683|SMC1A_HUMAN	1	11	11	3.7	143.23	0	35.843	22	1
sp|Q14694|UBP10_HUMAN	1	7	7	1.5	87.133	0	33.395	14	1
sp|Q14697|GANAB_HUMAN	1	15	15	8.2	106.87	0	172.66	81	1
sp|Q14728|MFS10_HUMAN	1	2	2	2.9	48.339	0	3.9958	3	1
sp|Q14738|2A5D_HUMAN;sp|Q13362|2A5G_HUMAN	2	5;1	5;1	2	69.991	0	27.536	8	1
sp|Q14764|MVP_HUMAN	1	19	19	18.5	99.326	0	236.97	89	1
sp|Q14789|GOGB1_HUMAN	1	31	31	0.8	376.01	0	137.92	51	1
sp|Q14790|CASP8_HUMAN	1	4	4	5	55.391	0	12.823	7	1
sp|Q14839|CHD4_HUMAN;sp|Q8TDI0|CHD5_HUMAN;sp|Q12873|CHD3_HUMAN	3	19;4;2	19;4;2	2.6	218	0	95.254	33	1
sp|Q14847|LASP1_HUMAN	1	5	5	14.2	29.717	0	159.29	47	1
sp|Q14914|PTGR1_HUMAN	1	3	3	7	35.869	0	12.433	4	1
sp|Q14974|IMB1_HUMAN	1	17	17	20.1	97.169	0	323.31	372	1
sp|Q14980|NUMA1_HUMAN	1	34	34	7.7	238.26	0	285.25	110	1
sp|Q15005|SPCS2_HUMAN	1	2	2	8	25.003	0	32.822	8	1
sp|Q15006|EMC2_HUMAN	1	5	5	15.2	34.833	0	77.426	14	1
sp|Q15007|FL2D_HUMAN	1	6	6	8.6	44.243	0	37.972	13	1
sp|Q15008|PSMD6_HUMAN	1	10	10	20.3	45.531	0	43.995	21	1
sp|Q15019|SEPT2_HUMAN	1	11	10	34.9	41.487	0	323.31	172	1
sp|Q15020|SART3_HUMAN	1	10	10	3.1	109.93	0	48.813	30	1
sp|Q15024|EXOS7_HUMAN	1	5	5	13.4	31.821	0	18.746	11	1
sp|Q15029|U5S1_HUMAN	1	24	24	22.8	109.43	0	323.31	141	1
sp|Q15041|AR6P1_HUMAN	1	1	1	4.9	23.362	0.0068607	1.6873	1	1
sp|Q15042|RB3GP_HUMAN	1	6	6	1.8	110.52	0	14.098	9	1
sp|Q15046|SYK_HUMAN	1	10	10	8.9	68.047	0	153.91	65	1
sp|Q15050|RRS1_HUMAN	1	3	3	4.7	41.193	0	13.73	5	1
sp|Q15056|IF4H_HUMAN	1	2	2	16.9	27.385	0	12.983	28	1
sp|Q15061|WDR43_HUMAN	1	6	6	1.2	74.89	0	38.298	30	1
sp|Q15067|ACOX1_HUMAN	1	9	9	6.2	74.423	0	35.553	22	1
sp|Q15070|OXA1L_HUMAN	1	2	2	1.8	48.547	0	3.7136	1	1
sp|Q15075|EEA1_HUMAN	1	12	12	0.7	162.46	0	83.402	25	1
sp|Q15084|PDIA6_HUMAN	1	14	14	26.6	48.121	0	323.31	374	1
sp|Q15102|PA1B3_HUMAN	1	3	3	13	25.734	0	11.311	13	1
sp|Q15125|EBP_HUMAN	1	2	2	4.3	26.352	0	8.2758	20	1
sp|Q15149|PLEC_HUMAN	1	131	129	29.4	531.78	0	323.31	1389	1
sp|Q15165|PON2_HUMAN	1	5	5	4.5	39.396	0	59.657	39	1
sp|Q15181|IPYR_HUMAN	1	10	10	13.5	32.66	0	75.68	52	1
sp|Q15185|TEBP_HUMAN	1	2	2	12.5	18.697	0	71.738	25	1
sp|Q15233|NONO_HUMAN	1	5	5	8.5	54.231	0	82.474	22	1
sp|Q15257|PTPA_HUMAN	1	5	5	6.4	40.667	0	16.402	9	1
sp|Q15269|PWP2_HUMAN	1	10	10	1.7	102.45	0	39.773	25	1
sp|Q15274|NADC_HUMAN	1	4	4	15.8	30.845	0	21.127	12	1
sp|Q15287|RNPS1_HUMAN	1	1	1	4.9	34.208	0	19.609	2	1
sp|Q15293|RCN1_HUMAN	1	9	9	31.7	38.89	0	323.31	69	1
sp|Q15363|TMED2_HUMAN	1	2	2	6	22.761	0	9.0195	3	1
sp|Q15365|PCBP1_HUMAN	1	11	10	34.8	37.497	0	233.92	222	1
sp|Q15366|PCBP2_HUMAN	1	8	6	17.3	38.58	0	71.4	132	1
sp|Q15369|ELOC_HUMAN	1	3	3	41.1	12.473	0	23.539	13	1
sp|Q15370|ELOB_HUMAN	1	4	4	50	13.133	0	10.611	17	1
sp|Q15388|TOM20_HUMAN	1	1	1	9	16.298	0	8.0192	23	1
sp|Q15393|SF3B3_HUMAN	1	20	20	15.8	135.58	0	266.26	129	1
sp|Q15417|CNN3_HUMAN	1	9	8	38	36.413	0	154.26	62	1
sp|Q15424|SAFB1_HUMAN	1	11	6	8.7	102.64	0	177.7	60	1
sp|Q15427|SF3B4_HUMAN	1	1	1	3.3	44.385	0	26.778	3	1
sp|Q15435|PP1R7_HUMAN	1	9	9	10.3	41.564	0	46.366	32	1
sp|Q15436|SC23A_HUMAN	1	11	8	5.9	86.16	0	43.17	35	1
sp|Q15437|SC23B_HUMAN	1	9	6	1.8	86.478	0	18.947	15	1
sp|Q15459|SF3A1_HUMAN	1	20	20	15.9	88.885	0	234.18	138	1
sp|Q15528|MED22_HUMAN	1	2	2	9	22.22	0	4.9157	6	1
sp|Q15633|TRBP2_HUMAN	1	3	3	2.7	39.039	0	8.7358	4	1
sp|Q15637|SF01_HUMAN	1	3	3	4.2	68.329	0	29.829	34	1
sp|Q15642|CIP4_HUMAN	1	2	2	3.8	68.351	0	6.4421	4	1
sp|Q15643|TRIPB_HUMAN	1	21	21	1.8	227.58	0	175.07	42	1
sp|Q15645|PCH2_HUMAN	1	10	10	7.6	48.55	0	55.428	38	1
sp|Q15653|IKBB_HUMAN	1	2	2	3.7	37.771	0	5.6482	2	1
sp|Q15654|TRIP6_HUMAN	1	7	7	4.2	50.287	0	37.609	30	1
sp|Q15691|MARE1_HUMAN	1	5	5	39.2	29.999	0	127.68	60	1
sp|Q15717|ELAV1_HUMAN	1	7	7	16.3	36.091	0	73.734	41	1
sp|Q15738|NSDHL_HUMAN	1	6	6	6.4	41.9	0	12.184	12	1
sp|Q15746|MYLK_HUMAN	1	1	1	0.4	210.71	0.0057143	1.7681	4	1
sp|Q15750|TAB1_HUMAN	1	4	4	2.6	54.643	0	7.1942	6	1
sp|Q15758|AAAT_HUMAN	1	9	9	25.5	56.598	0	267.51	112	1
sp|Q15819|UB2V2_HUMAN	1	3	1	32.4	16.363	0	7.7226	3	1
sp|Q15833|STXB2_HUMAN	1	3	3	1.9	66.452	0	38.93	9	1
sp|Q15904|VAS1_HUMAN	1	7	7	3.8	52.025	0	22.548	27	1
sp|Q15907|RB11B_HUMAN	1	6	2	24.8	24.488	0	107.23	32	1
sp|Q15942|ZYX_HUMAN	1	4	4	3	61.277	0	33.393	67	1
sp|Q16181|SEPT7_HUMAN	1	8	7	19.9	50.679	0	101.43	79	1
sp|Q16186|ADRM1_HUMAN	1	3	3	8.4	42.153	0	18.57	18	1
sp|Q16204|CCDC6_HUMAN	1	4	4	3	53.29	0	17.948	16	1
sp|Q16401|PSMD5_HUMAN	1	13	13	3.8	56.195	0	35.757	51	1
sp|Q16531|DDB1_HUMAN	1	16	16	4.8	126.97	0	84.209	128	1
sp|Q16539|MK14_HUMAN	1	3	3	2.2	41.293	0	4.3336	6	1
sp|Q16543|CDC37_HUMAN	1	6	6	13	44.468	0	62.622	28	1
sp|Q16563|SYPL1_HUMAN	1	4	4	13.9	28.565	0	31.469	43	1
sp|Q16595|FRDA_HUMAN	1	3	3	5.7	23.135	0	6.9175	8	1
sp|Q16630|CPSF6_HUMAN	1	7	7	15.2	59.209	0	135.37	30	1
sp|Q16643|DREB_HUMAN	1	9	9	11.4	71.428	0	143.84	26	1
sp|Q16658|FSCN1_HUMAN	1	9	9	17.4	54.529	0	72.86	33	1
sp|Q16666|IF16_HUMAN	1	2	2	2	88.255	0	3.2707	2	1
sp|Q16698|DECR_HUMAN	1	5	5	7.5	36.067	0	125.98	80	1
sp|Q16718|NDUA5_HUMAN	1	3	3	12.9	13.459	0	84.409	30	1
sp|Q16740|CLPP_HUMAN	1	6	6	23.1	30.18	0	123.28	35	1
sp|Q16762|THTR_HUMAN	1	8	8	19.9	33.429	0	99.238	56	1
sp|Q16778|H2B2E_HUMAN;sp|P33778|H2B1B_HUMAN;sp|P23527|H2B1O_HUMAN;sp|P06899|H2B1J_HUMAN;sp|Q8N257|H2B3B_HUMAN;sp|Q6DRA6|H2B2D_HUMAN;sp|Q6DN03|H2B2C_HUMAN	7	6;6;6;6;5;2;2	2;2;2;2;2;2;2	19.8	13.92	0	170.91	232	1
sp|Q16795|NDUA9_HUMAN	1	5	5	3.4	42.509	0	12.559	11	1
sp|Q16822|PCKGM_HUMAN;sp|P35558|PCKGC_HUMAN	2	19;1	19;1	28.4	70.729	0	323.31	117	1
sp|Q16836|HCDH_HUMAN	1	6	6	7	34.293	0	60.929	29	1
sp|Q16850|CP51A_HUMAN	1	1	1	2.8	56.805	0.0097905	1.3198	0	1
sp|Q16851|UGPA_HUMAN	1	7	7	6.3	56.94	0	31.57	22	1
sp|Q16881|TRXR1_HUMAN	1	15	14	26.2	70.905	0	323.31	149	1
sp|Q16890|TPD53_HUMAN	1	2	2	4.9	22.449	0	3.2849	3	1
sp|Q16891|MIC60_HUMAN	1	14	14	19.1	83.677	0	290.81	184	1
sp|Q1KMD3|HNRL2_HUMAN	1	10	10	5.4	85.104	0	138.86	64	1
sp|Q27J81|INF2_HUMAN	1	20	20	16.8	135.62	0	139.82	60	1
sp|Q29RF7|PDS5A_HUMAN	1	9	8	2.2	150.83	0	22.003	11	1
sp|Q2M1Z3|RHG31_HUMAN	1	3	3	0.7	156.98	0.0098084	1.3444	3	1
sp|Q2TAA2|IAH1_HUMAN	1	2	2	6.9	27.598	0	14.736	2	1
sp|Q2TAL8|QRIC1_HUMAN	1	4	4	3.5	86.435	0	25.95	5	1
sp|Q2TAY7|SMU1_HUMAN	1	5	5	2.1	57.543	0	29.822	10	1
sp|Q2TB90|HKDC1_HUMAN	1	6	4	1.5	102.54	0	15.061	13	1
sp|Q2VPK5|CTU2_HUMAN	1	2	2	3.7	56.107	0	16.486	8	1
sp|Q32MZ4|LRRF1_HUMAN	1	11	11	11	89.252	0	163.79	39	1
sp|Q32P41|TRM5_HUMAN	1	3	3	1.8	58.246	0	6.1619	4	1
sp|Q32P44|EMAL3_HUMAN	1	1	1	1.8	95.196	0	3.5328	1	1
sp|Q3LXA3|TKFC_HUMAN	1	9	9	3.7	58.946	0	21.657	24	1
sp|Q3MHD2|LSM12_HUMAN	1	3	3	6.7	21.701	0	34.28	15	1
sp|Q3MIR4|CC50B_HUMAN	1	3	2	2.3	38.941	0	3.22	2	1
sp|Q3SYG4|PTHB1_HUMAN	1	1	1	2.6	99.279	0.0041122	1.954	8	1
sp|Q3ZCM7|TBB8_HUMAN	1	6	2	18.5	49.775	0	46.605	15	1
sp|Q3ZCQ8|TIM50_HUMAN	1	6	6	12.5	39.646	0	40.713	41	1
sp|Q4V328|GRAP1_HUMAN	1	9	9	1.8	95.988	0	36.253	12	1
sp|Q4VC31|CCD58_HUMAN	1	5	5	28.5	16.62	0	47.616	40	1
sp|Q52LJ0|FA98B_HUMAN	1	5	5	5.8	37.19	0	27.272	8	1
sp|Q52LW3|RHG29_HUMAN	1	7	7	1.7	142.06	0	9.2347	7	1
sp|Q53EL6|PDCD4_HUMAN	1	7	7	8.1	51.735	0	33.629	18	1
sp|Q53EP0|FND3B_HUMAN	1	12	12	5	132.89	0	19.948	20	1
sp|Q53FT3|HIKES_HUMAN	1	2	2	6.6	21.627	0	4.8445	3	1
sp|Q53GQ0|DHB12_HUMAN	1	7	7	14.1	34.324	0	37.224	30	1
sp|Q53H82|LACB2_HUMAN	1	7	7	22.9	32.805	0	54.708	35	1
sp|Q53H96|P5CR3_HUMAN	1	4	4	5.1	28.663	0	8.1499	9	1
sp|Q53T59|H1BP3_HUMAN	1	6	6	4.3	42.78	0	36.262	33	1
sp|Q562R1|ACTBL_HUMAN	1	5	1	8.8	42.003	0	3.7023	13	1
sp|Q58FF6|H90B4_HUMAN	1	5	1	4.8	58.264	0.00053879	3.0461	3	1
sp|Q58FF8|H90B2_HUMAN	1	7	1	12.3	44.348	0	4.655	2	1
sp|Q5BKZ1|ZN326_HUMAN	1	3	3	2.7	65.653	0	13.37	9	1
sp|Q5C9Z4|NOM1_HUMAN	1	2	2	1.6	96.256	0	4.8036	6	1
sp|Q5H9R7|PP6R3_HUMAN	1	5	5	1.6	97.668	0	42.273	18	1
sp|Q5JPE7|NOMO2_HUMAN;sp|P69849|NOMO3_HUMAN;sp|Q15155|NOMO1_HUMAN	3	15;14;13	15;14;13	6.9	139.44	0	71.764	50	1
sp|Q5JRA6|MIA3_HUMAN	1	9	9	1.4	213.7	0	33.881	20	1
sp|Q5JRX3|PREP_HUMAN	1	12	12	4	117.41	0	20.798	18	1
sp|Q5JTD0|TJAP1_HUMAN	1	5	5	1.8	61.82	0	12.86	7	1
sp|Q5JTH9|RRP12_HUMAN	1	5	5	2.6	143.7	0	56.767	14	1
sp|Q5JTJ3|COA6_HUMAN	1	2	2	21.6	14.116	0	4.9216	3	1
sp|Q5JTV8|TOIP1_HUMAN	1	7	7	8.7	66.248	0	36.547	34	1
sp|Q5JTZ9|SYAM_HUMAN	1	6	6	2.7	107.34	0	14.574	16	1
sp|Q5QJE6|TDIF2_HUMAN	1	6	6	4.6	84.468	0	15.974	15	1
sp|Q5SW79|CE170_HUMAN;sp|Q96L14|C170L_HUMAN	2	7;3	7;3	0.9	175.29	0	6.5273	6	1
sp|Q5T1M5|FKB15_HUMAN	1	7	7	2.1	133.63	0	11.538	13	1
sp|Q5T440|CAF17_HUMAN	1	4	4	3.1	38.155	0	8.5464	7	1
sp|Q5T6F2|UBAP2_HUMAN	1	8	8	3	117.11	0	39.549	10	1
sp|Q5T6V5|CI064_HUMAN	1	2	2	2.9	39.028	0	10.186	2	1
sp|Q5T8P6|RBM26_HUMAN	1	4	4	1.6	113.6	0	11.192	4	1
sp|Q5TDH0|DDI2_HUMAN	1	7	7	3.5	44.522	0	14.032	8	1
sp|Q5TFE4|NT5D1_HUMAN	1	2	2	2.9	51.844	0	3.5497	2	1
sp|Q5TZA2|CROCC_HUMAN	1	2	2	0.4	228.52	0	8.5546	5	1
sp|Q5U5X0|LYRM7_HUMAN	1	2	2	9.6	11.955	0	6.4619	8	1
sp|Q5UCC4|EMC10_HUMAN	1	2	2	3.8	27.347	0	10.117	7	1
sp|Q5VIR6|VPS53_HUMAN	1	4	4	1.1	79.652	0	10.522	8	1
sp|Q5VTR2|BRE1A_HUMAN	1	9	8	1.1	113.66	0	17.326	11	1
sp|Q5VYK3|ECM29_HUMAN	1	15	15	0.7	204.29	0	17.716	21	1
sp|Q5VZF2|MBNL2_HUMAN;sp|Q9NUK0|MBNL3_HUMAN	2	4;1	2;0	2.4	40.517	0.0013082	2.7873	2	1
sp|Q5W111|SPRY7_HUMAN	1	3	3	8.7	21.666	0	6.623	6	1
sp|Q5XKP0|MIC13_HUMAN	1	3	3	16.9	13.087	0	55.773	92	1
sp|Q5ZPR3|CD276_HUMAN	1	5	5	8.2	57.235	0	120.66	50	1
sp|Q63HN8|RN213_HUMAN	1	26	26	0.8	591.4	0	69.52	56	1
sp|Q63ZY3|KANK2_HUMAN;sp|Q14678|KANK1_HUMAN	2	10;1	10;1	4.3	91.173	0	23.524	25	1
sp|Q68CZ2|TENS3_HUMAN	1	12	12	4.1	155.26	0	49.684	31	1
sp|Q68E01|INT3_HUMAN	1	6	6	2.7	118.07	0	4.3674	5	1
sp|Q6DD87|ZN787_HUMAN	1	2	2	5	40.543	0	68.795	19	1
sp|Q6DD88|ATLA3_HUMAN	1	5	5	3.5	60.541	0	88.8	20	1
sp|Q6DKJ4|NXN_HUMAN	1	6	6	12.6	48.392	0	20.309	15	1
sp|Q6EEV6|SUMO4_HUMAN;sp|P61956|SUMO2_HUMAN;sp|P55854|SUMO3_HUMAN	3	2;1;1	2;1;1	12.6	10.685	0	16.657	3	1
sp|Q6I9Y2|THOC7_HUMAN	1	1	1	6.4	23.743	0.0070522	1.6263	2	1
sp|Q6IAA8|LTOR1_HUMAN	1	6	6	8.1	17.745	0	22.738	17	1
sp|Q6IBS0|TWF2_HUMAN	1	6	6	4.6	39.548	0	49.392	12	1
sp|Q6IN84|MRM1_HUMAN	1	1	1	3.1	38.638	0.0045706	1.8936	1	1
sp|Q6NSJ5|LRC8E_HUMAN	1	6	6	1.9	90.246	0	25.716	16	1
sp|Q6NUK1|SCMC1_HUMAN	1	8	8	19.9	53.354	0	75.582	68	1
sp|Q6NUQ4|TM214_HUMAN	1	6	6	5.4	77.15	0	26.6	20	1
sp|Q6NVY1|HIBCH_HUMAN	1	5	5	4.9	43.482	0	14.021	24	1
sp|Q6NYC8|PPR18_HUMAN	1	3	3	6.5	67.942	0	12.137	3	1
sp|Q6NZI2|PTRF_HUMAN	1	11	11	29.5	43.476	0	323.31	139	1
sp|Q6P1L8|RM14_HUMAN	1	3	3	6.9	15.947	0	15.71	10	1
sp|Q6P1N9|TATD1_HUMAN	1	5	5	8.4	33.601	0	68.881	10	1
sp|Q6P1X6|CH082_HUMAN	1	3	3	6.9	23.889	0	23.878	8	1
sp|Q6P2E9|EDC4_HUMAN	1	23	23	11.8	151.66	0	240.65	132	1
sp|Q6P2I3|FAH2B_HUMAN	1	6	2	4.1	34.613	0	6.0791	4	1
sp|Q6P2Q9|PRP8_HUMAN	1	18	18	0.7	273.6	0	61.649	39	1
sp|Q6P582|MZT2A_HUMAN;sp|Q6NZ67|MZT2B_HUMAN	2	3;2	3;2	4.4	16.22	0.0027289	2.2278	9	1
sp|Q6P587|FAHD1_HUMAN	1	4	4	7.1	24.843	0	54.644	44	1
sp|Q6P597|KLC3_HUMAN	1	5	4	2.8	55.364	0	6.1397	6	1
sp|Q6PI48|SYDM_HUMAN	1	13	13	4.3	73.562	0	29.225	26	1
sp|Q6PI78|TMM65_HUMAN	1	1	1	4.6	25.498	0.0010616	2.9234	4	1
sp|Q6PIU2|NCEH1_HUMAN	1	7	7	9.6	45.807	0	84.981	36	1
sp|Q6PJG6|BRAT1_HUMAN	1	6	6	1.5	88.118	0	6.287	5	1
sp|Q6PKG0|LARP1_HUMAN;sp|Q659C4|LAR1B_HUMAN	2	10;2	10;2	1.8	123.51	0	19.779	12	1
sp|Q6RFH5|WDR74_HUMAN	1	4	4	3.4	42.441	0	9.2825	8	1
sp|Q6UB35|C1TM_HUMAN	1	11	11	8.5	105.79	0	49.395	55	1
sp|Q6UN15|FIP1_HUMAN	1	7	7	5.4	66.526	0	53.149	28	1
sp|Q6UVK1|CSPG4_HUMAN	1	20	20	1.2	250.53	0	199.06	53	1
sp|Q6UW78|UQCC3_HUMAN	1	1	1	23.7	10.081	0	16.58	3	1
sp|Q6UX04|CWC27_HUMAN	1	3	3	3.2	53.846	0	9.4256	5	1
sp|Q6UXN9|WDR82_HUMAN	1	2	2	6.4	35.079	0	10.721	5	1
sp|Q6WCQ1|MPRIP_HUMAN	1	14	14	9.4	116.53	0	52.687	40	1
sp|Q6XQN6|PNCB_HUMAN	1	7	7	18.4	57.578	0	227.7	12	1
sp|Q6Y7W6|PERQ2_HUMAN	1	10	10	3.2	150.07	0	60.004	33	1
sp|Q6YHK3|CD109_HUMAN	1	19	19	5.7	161.69	0	180.28	121	1
sp|Q6YN16|HSDL2_HUMAN	1	7	7	13.6	45.394	0	98.288	37	1
sp|Q6ZRP7|QSOX2_HUMAN	1	3	3	2.3	77.528	0	11.537	16	1
sp|Q6ZS17|FA65A_HUMAN	1	5	5	0.7	132.31	0	9.0299	9	1
sp|Q6ZVM7|TM1L2_HUMAN	1	3	3	5.5	55.556	0	7.5005	3	1
sp|Q70J99|UN13D_HUMAN	1	12	12	1.2	123.28	0	27.084	19	1
sp|Q70UQ0|IKIP_HUMAN	1	6	6	3.4	39.309	0	27.862	14	1
sp|Q71RC2|LARP4_HUMAN	1	7	7	3	80.595	0	15.689	11	1
sp|Q71U36|TBA1A_HUMAN;sp|Q13748|TBA3C_HUMAN;sp|Q6PEY2|TBA3E_HUMAN	3	18;12;11	1;1;1	48.1	50.135	0	3.3742	2	1
sp|Q71UI9|H2AV_HUMAN;sp|P0C0S5|H2AZ_HUMAN	2	5;5	3;3	16.4	13.509	0	10.079	23	1
sp|Q7KZF4|SND1_HUMAN	1	10	10	7.4	102	0	62.356	41	1
sp|Q7L014|DDX46_HUMAN	1	6	6	0.8	117.36	0	15.084	16	1
sp|Q7L0Y3|MRRP1_HUMAN	1	9	9	12.4	47.346	0	53.422	14	1
sp|Q7L1Q6|BZW1_HUMAN	1	4	4	8.8	48.043	0	21.028	26	1
sp|Q7L2H7|EIF3M_HUMAN	1	12	12	15	42.502	0	103.96	75	1
sp|Q7L592|NDUF7_HUMAN	1	7	7	4.5	49.237	0	15.331	9	1
sp|Q7L5D6|GET4_HUMAN	1	2	2	4.6	36.504	0	7.5895	12	1
sp|Q7L5N1|CSN6_HUMAN	1	8	8	4	36.163	0	24.533	20	1
sp|Q7LGA3|HS2ST_HUMAN	1	4	4	7.6	41.881	0	11.942	10	1
sp|Q7RTV0|PHF5A_HUMAN	1	2	2	14.5	12.405	0	66.229	25	1
sp|Q7Z2T5|TRM1L_HUMAN	1	3	3	1.9	81.746	0	6.6072	3	1
sp|Q7Z2W9|RM21_HUMAN	1	4	4	14.6	22.814	0	8.0659	6	1
sp|Q7Z3B4|NUP54_HUMAN	1	9	9	3.9	55.435	0	27.912	26	1
sp|Q7Z3K3|POGZ_HUMAN	1	6	6	1.2	155.34	0	24.364	12	1
sp|Q7Z406|MYH14_HUMAN	1	25	20	6.5	227.87	0	150.48	76	1
sp|Q7Z417|NUFP2_HUMAN	1	7	7	1.4	76.12	0	9.8181	8	1
sp|Q7Z434|MAVS_HUMAN	1	6	6	5.7	56.527	0	46.778	24	1
sp|Q7Z4Q2|HEAT3_HUMAN	1	3	3	1.6	74.582	0	5.9065	7	1
sp|Q7Z4V5|HDGR2_HUMAN	1	1	1	3.1	74.316	0	7.294	1	1
sp|Q7Z4W1|DCXR_HUMAN	1	6	6	11.1	25.913	0	63.973	25	1
sp|Q7Z6Z7|HUWE1_HUMAN	1	27	27	1.1	481.89	0	131.94	79	1
sp|Q7Z739|YTHD3_HUMAN	1	4	3	1.2	63.86	0	18.645	25	1
sp|Q7Z7A3|CTU1_HUMAN	1	2	2	4.3	36.45	0.0075047	1.6005	2	1
sp|Q7Z7H5|TMED4_HUMAN	1	2	1	12.3	25.943	0	129.93	10	1
sp|Q7Z7H8|RM10_HUMAN	1	4	4	11.1	29.282	0	21.582	14	1
sp|Q7Z7K0|COXM1_HUMAN	1	1	1	9.4	12.49	0.0017875	2.5623	1	1
sp|Q7Z7N9|T179B_HUMAN	1	1	1	7.3	23.55	0.0018032	2.6405	1	1
sp|Q86SQ4|GP126_HUMAN	1	4	4	1.1	136.69	0	8.743	9	1
sp|Q86SX6|GLRX5_HUMAN	1	3	3	28	16.628	0	42.187	36	1
sp|Q86TG7|PEG10_HUMAN	1	7	7	7.2	80.172	0	77.35	27	1
sp|Q86U28|ISCA2_HUMAN	1	3	3	9.1	16.476	0	5.4599	5	1
sp|Q86U42|PABP2_HUMAN	1	3	3	5.2	32.749	0	50.14	47	1
sp|Q86UA1|PRP39_HUMAN	1	2	2	1.8	78.429	0	21.364	6	1
sp|Q86UE4|LYRIC_HUMAN	1	12	12	9.1	63.836	0	114.99	36	1
sp|Q86UP2|KTN1_HUMAN	1	26	26	12.2	156.27	0	161.04	60	1
sp|Q86UX7|URP2_HUMAN	1	10	10	2.1	75.952	0	42.665	17	1
sp|Q86V48|LUZP1_HUMAN	1	2	2	0.9	120.27	0	3.39	1	1
sp|Q86V81|THOC4_HUMAN	1	5	5	21	26.888	0	161.09	20	1
sp|Q86VP6|CAND1_HUMAN	1	18	18	4.8	136.37	0	136.09	79	1
sp|Q86VR2|F134C_HUMAN	1	1	1	3.2	51.396	0.0022545	2.33	1	1
sp|Q86W42|THOC6_HUMAN	1	6	6	4.1	37.535	0	26.301	12	1
sp|Q86W92|LIPB1_HUMAN	1	12	10	3.5	114.02	0	47.142	22	1
sp|Q86X29|LSR_HUMAN	1	4	4	2.2	71.438	0	15.339	25	1
sp|Q86X55|CARM1_HUMAN	1	7	7	2.1	65.853	0	41.038	27	1
sp|Q86X83|COMD2_HUMAN	1	1	1	3.5	22.745	0.0098196	1.3593	4	1
sp|Q86XP3|DDX42_HUMAN	1	11	11	3.8	102.97	0	27.047	27	1
sp|Q86Y56|DAAF5_HUMAN	1	11	11	3.5	93.52	0	72.859	38	1
sp|Q86Y82|STX12_HUMAN	1	5	5	17	31.642	0	122.22	33	1
sp|Q8IUR7|ARMC8_HUMAN	1	2	2	1.9	75.509	0	24.028	5	1
sp|Q8IV08|PLD3_HUMAN	1	7	7	2	54.705	0	32.812	17	1
sp|Q8IVF2|AHNK2_HUMAN	1	28	28	5.2	616.62	0	66.237	54	1
sp|Q8IVS2|FABD_HUMAN	1	9	9	12.8	42.961	0	27.788	28	1
sp|Q8IWA5|CTL2_HUMAN	1	1	1	1.7	80.123	0.00079957	2.9515	1	1
sp|Q8IWE2|NXP20_HUMAN	1	4	4	2.7	60.741	0	15.34	13	1
sp|Q8IWJ2|GCC2_HUMAN	1	9	9	0.9	195.91	0	12.419	13	1
sp|Q8IWX8|CHERP_HUMAN	1	9	9	0.9	103.7	0	94.108	27	1
sp|Q8IWZ3|ANKH1_HUMAN	1	15	9	1.1	269.45	0	57.594	35	1
sp|Q8IXH7|NELFD_HUMAN	1	8	8	6.6	66.246	0	56.565	16	1
sp|Q8IXI2|MIRO1_HUMAN	1	5	5	1.5	70.783	0	11.452	15	1
sp|Q8IXM3|RM41_HUMAN	1	4	4	10.9	15.383	0	12.488	16	1
sp|Q8IY81|SPB1_HUMAN	1	7	7	0.9	96.557	0	19.933	12	1
sp|Q8IYI6|EXOC8_HUMAN	1	4	4	4.8	81.798	0	6.7601	5	1
sp|Q8IYT4|KATL2_HUMAN	1	2	2	2.2	61.252	0	7.9568	13	1
sp|Q8IYU8|MICU2_HUMAN	1	2	2	3	49.666	0	7.6303	5	1
sp|Q8IZL8|PELP1_HUMAN	1	10	10	5.7	119.7	0	69.839	53	1
sp|Q8IZP0|ABI1_HUMAN	1	6	6	2.2	55.08	0	28.383	17	1
sp|Q8N163|CCAR2_HUMAN	1	12	12	8.8	102.9	0	80.789	38	1
sp|Q8N1F7|NUP93_HUMAN	1	17	17	10.5	93.487	0	71.912	40	1
sp|Q8N357|S35F6_HUMAN	1	1	1	3.8	40.214	0.0059368	1.7296	0	1
sp|Q8N3D4|EH1L1_HUMAN	1	7	7	1.6	161.85	0	31.577	10	1
sp|Q8N3U4|STAG2_HUMAN	1	8	5	4.1	141.32	0	55.706	19	1
sp|Q8N4Q1|MIA40_HUMAN	1	3	3	16.9	15.996	0	40.538	8	1
sp|Q8N556|AFAP1_HUMAN	1	6	6	1.2	80.724	0	8.6714	7	1
sp|Q8N5K1|CISD2_HUMAN	1	4	4	19.3	15.278	0	18.99	8	1
sp|Q8N5M4|TTC9C_HUMAN	1	2	2	5.3	20.012	0	5.9158	3	1
sp|Q8N5M9|JAGN1_HUMAN	1	1	1	6.6	21.125	0.0061553	1.7045	3	1
sp|Q8N5N7|RM50_HUMAN	1	4	4	27.8	18.325	0	23.43	40	1
sp|Q8N668|COMD1_HUMAN	1	3	3	7.4	21.178	0	7.941	5	1
sp|Q8N684|CPSF7_HUMAN	1	3	3	5.3	52.049	0	5.7709	6	1
sp|Q8N6T3|ARFG1_HUMAN	1	4	4	2.2	44.667	0	11.795	11	1
sp|Q8N766|EMC1_HUMAN	1	10	10	2	111.76	0	23.789	39	1
sp|Q8N7H5|PAF1_HUMAN	1	5	5	2.6	59.975	0	50.401	22	1
sp|Q8NB90|SPAT5_HUMAN	1	11	10	5.3	97.903	0	40.803	28	1
sp|Q8NBJ4|GOLM1_HUMAN	1	6	6	4.7	45.333	0	28.931	11	1
sp|Q8NBJ5|GT251_HUMAN	1	8	8	11.9	71.635	0	72.933	43	1
sp|Q8NBJ7|SUMF2_HUMAN	1	4	4	4	33.843	0	18.262	11	1
sp|Q8NBL1|PGLT1_HUMAN	1	3	3	3.6	46.189	0	4.2543	3	1
sp|Q8NBM8|PCYXL_HUMAN	1	1	1	2.2	54.646	0	3.2306	4	1
sp|Q8NBN7|RDH13_HUMAN	1	5	5	16.3	35.932	0	53.142	39	1
sp|Q8NBQ5|DHB11_HUMAN	1	3	3	2.7	32.935	0	9.4925	5	1
sp|Q8NBS9|TXND5_HUMAN	1	7	7	10.9	47.628	0	40.003	14	1
sp|Q8NBU5|ATAD1_HUMAN	1	5	5	3.9	40.744	0	18.01	17	1
sp|Q8NBX0|SCPDL_HUMAN	1	4	4	1.9	47.151	0	9.0837	8	1
sp|Q8NC51|PAIRB_HUMAN	1	5	5	10.8	44.965	0	43.377	38	1
sp|Q8NC56|LEMD2_HUMAN	1	4	4	4.4	56.974	0	13.106	11	1
sp|Q8NCG7|DGLB_HUMAN	1	3	3	2.7	73.731	0	11.319	2	1
sp|Q8NCW5|NNRE_HUMAN	1	5	5	12.8	31.674	0	23.204	17	1
sp|Q8ND24|RN214_HUMAN	1	5	5	1.6	77.667	0	13.953	5	1
sp|Q8NDC0|MISSL_HUMAN	1	1	1	6.9	24.269	0	29.923	6	1
sp|Q8NDI1|EHBP1_HUMAN	1	3	3	0.6	140.02	0	3.3994	3	1
sp|Q8NE71|ABCF1_HUMAN	1	2	2	1.3	95.925	0	4.7143	3	1
sp|Q8NEJ9|NGDN_HUMAN	1	3	3	5.7	35.894	0	27.409	28	1
sp|Q8NEV1|CSK23_HUMAN;sp|P68400|CSK21_HUMAN	2	4;4	4;4	7.7	45.219	0	41.681	12	1
sp|Q8NFF5|FAD1_HUMAN	1	1	1	3.6	65.265	0	21.521	6	1
sp|Q8NFJ5|RAI3_HUMAN	1	3	3	5	40.251	0	30.48	17	1
sp|Q8NFQ8|TOIP2_HUMAN	1	3	3	2.3	51.263	0	11.475	17	1
sp|Q8NFV4|ABHDB_HUMAN	1	3	3	8.9	34.69	0	36.635	10	1
sp|Q8NFZ8|CADM4_HUMAN	1	4	4	4.6	42.785	0	5.2985	3	1
sp|Q8NI60|ADCK3_HUMAN	1	4	4	1.5	71.949	0	14.544	9	1
sp|Q8TAQ2|SMRC2_HUMAN	1	10	7	6.6	132.88	0	83.656	29	1
sp|Q8TAT6|NPL4_HUMAN	1	8	8	5.9	68.119	0	57.831	22	1
sp|Q8TC07|TBC15_HUMAN	1	8	8	1.9	79.49	0	43.057	13	1
sp|Q8TC12|RDH11_HUMAN	1	5	5	8.8	35.386	0	22.396	21	1
sp|Q8TCS8|PNPT1_HUMAN	1	20	20	9.3	85.95	0	141.63	80	1
sp|Q8TCT9|HM13_HUMAN	1	2	2	9	41.488	0	27.697	16	1
sp|Q8TCZ2|C99L2_HUMAN	1	3	3	5.7	27.986	0	17.246	4	1
sp|Q8TD19|NEK9_HUMAN	1	11	11	4.2	107.17	0	101.5	37	1
sp|Q8TE02|ELP5_HUMAN	1	1	1	4.1	34.841	0.0010568	2.881	2	1
sp|Q8TE68|ES8L1_HUMAN	1	3	3	1.4	80.25	0	9.0407	8	1
sp|Q8TEM1|PO210_HUMAN	1	26	26	5.9	205.11	0	193.75	250	1
sp|Q8TEQ6|GEMI5_HUMAN	1	5	5	0.9	168.59	0	21.865	7	1
sp|Q8TEX9|IPO4_HUMAN	1	12	12	1.9	118.71	0	89.291	45	1
sp|Q8WTW3|COG1_HUMAN	1	5	5	1	108.98	0	11.851	11	1
sp|Q8WUD1|RAB2B_HUMAN	1	6	2	10.6	24.214	0	9.3287	7	1
sp|Q8WUK0|PTPM1_HUMAN	1	2	2	6	22.843	0	4.549	2	1
sp|Q8WUM0|NU133_HUMAN	1	11	11	2.9	128.98	0	74.598	26	1
sp|Q8WUM4|PDC6I_HUMAN	1	20	20	20.3	96.022	0	323.31	150	1
sp|Q8WUW1|BRK1_HUMAN	1	1	1	17.3	8.7448	0	12.9	4	1
sp|Q8WVM0|TFB1M_HUMAN	1	4	4	4	39.542	0	53.601	10	1
sp|Q8WVM7|STAG1_HUMAN	1	6	3	0.6	144.43	0	5.2326	3	1
sp|Q8WVM8|SCFD1_HUMAN	1	12	12	18.5	72.379	0	100.98	70	1
sp|Q8WVV9|HNRLL_HUMAN	1	5	5	4.8	60.082	0	17.044	8	1
sp|Q8WW12|PCNP_HUMAN	1	1	1	8.4	18.925	0	4.6671	4	1
sp|Q8WW59|SPRY4_HUMAN	1	1	1	4.8	23.128	0	3.1105	4	1
sp|Q8WWI1|LMO7_HUMAN	1	7	7	0.5	192.69	0	25.105	12	1
sp|Q8WWM7|ATX2L_HUMAN	1	5	5	4.9	113.37	0	31.229	108	1
sp|Q8WWY3|PRP31_HUMAN	1	7	7	11.6	55.455	0	25.719	15	1
sp|Q8WX92|NELFB_HUMAN	1	6	6	3.3	65.697	0	29.887	17	1
sp|Q8WXF1|PSPC1_HUMAN	1	7	7	5.4	58.743	0	95.297	33	1
sp|Q8WXG9|GPR98_HUMAN	1	2	2	0.2	693.06	0	3.5232	3	1
sp|Q8WXX5|DNJC9_HUMAN	1	3	3	4.2	29.909	0	17.952	8	1
sp|Q8WYA6|CTBL1_HUMAN	1	3	3	2.7	65.173	0	6.4247	6	1
sp|Q8WZ42|TITIN_HUMAN	1	7	7	0.1	3816	0	3.78	7	1
sp|Q8WZA0|LZIC_HUMAN	1	2	2	11.6	21.494	0	6.69	8	1
sp|Q92499|DDX1_HUMAN	1	10	10	7.2	82.431	0	96.705	59	1
sp|Q92506|DHB8_HUMAN	1	5	5	5.7	26.973	0	14.379	16	1
sp|Q92520|FAM3C_HUMAN	1	4	4	8.4	24.68	0	40.744	33	1
sp|Q92526|TCPW_HUMAN	1	4	1	6.2	57.821	0.0022528	2.3163	2	1
sp|Q92530|PSMF1_HUMAN	1	3	3	10.7	29.816	0	109.13	76	1
sp|Q92536|YLAT2_HUMAN	1	2	1	1.4	56.827	0	3.7316	1	1
sp|Q92552|RT27_HUMAN	1	6	6	5.6	47.611	0	46.438	54	1
sp|Q92572|AP3S1_HUMAN	1	4	4	13	21.732	0	15.03	6	1
sp|Q92597|NDRG1_HUMAN	1	4	4	6.3	42.835	0	21.217	14	1
sp|Q92598|HS105_HUMAN	1	23	21	20.4	96.864	0	178.21	106	1
sp|Q92599|SEPT8_HUMAN	1	5	4	3.9	55.756	0	42.393	12	1
sp|Q92600|RCD1_HUMAN	1	4	4	4.7	33.631	0	72.25	21	1
sp|Q92615|LAR4B_HUMAN	1	8	8	4.3	80.551	0	30.919	58	1
sp|Q92616|GCN1L_HUMAN	1	40	40	5.1	292.75	0	215.68	118	1
sp|Q92665|RT31_HUMAN	1	7	7	17.5	45.318	0	60.657	52	1
sp|Q92688|AN32B_HUMAN	1	6	4	15.5	28.787	0	216.31	73	1
sp|Q92692|PVRL2_HUMAN	1	9	9	11	57.741	0	36.067	25	1
sp|Q92734|TFG_HUMAN	1	8	8	20	43.447	0	150.48	33	1
sp|Q92769|HDAC2_HUMAN	1	6	4	12.3	55.364	0	77.077	9	1
sp|Q92783|STAM1_HUMAN	1	7	7	9.4	59.179	0	37.99	18	1
sp|Q92785|REQU_HUMAN	1	4	4	3.8	44.155	0	28.374	14	1
sp|Q92797|SYMPK_HUMAN	1	11	11	2.1	141.15	0	65.514	25	1
sp|Q92804|RBP56_HUMAN	1	5	3	17.2	61.829	0	76.372	17	1
sp|Q92817|EVPL_HUMAN;sp|A8MZ36|EVPLL_HUMAN	2	19;1	19;1	2.2	231.6	0	102.95	37	1
sp|Q92841|DDX17_HUMAN	1	18	13	14.4	80.272	0	35.625	49	1
sp|Q92878|RAD50_HUMAN	1	9	9	2.3	153.89	0	22.565	15	1
sp|Q92879|CELF1_HUMAN;sp|O95319|CELF2_HUMAN	2	3;1	3;1	6.4	52.063	0	6.0475	6	1
sp|Q92888|ARHG1_HUMAN	1	10	10	2.6	102.43	0	24.429	27	1
sp|Q92890|UFD1_HUMAN	1	5	5	8.1	34.5	0	13.635	17	1
sp|Q92896|GSLG1_HUMAN	1	18	18	15.7	134.55	0	320.29	85	1
sp|Q92900|RENT1_HUMAN	1	18	18	8.3	124.34	0	204.08	53	1
sp|Q92922|SMRC1_HUMAN	1	9	6	5.3	122.87	0	28.752	12	1
sp|Q92945|FUBP2_HUMAN	1	21	21	33.8	73.114	0	323.31	241	1
sp|Q92973|TNPO1_HUMAN	1	14	12	6.9	102.35	0	167.05	113	1
sp|Q92974|ARHG2_HUMAN	1	10	10	2.7	111.54	0	32.356	22	1
sp|Q93008|USP9X_HUMAN;sp|O00507|USP9Y_HUMAN	2	9;5	9;5	1.1	292.28	0	24.055	14	1
sp|Q93009|UBP7_HUMAN	1	8	8	1.1	128.3	0	22.104	17	1
sp|Q93050|VPP1_HUMAN	1	5	4	1.1	96.412	0	11.531	9	1
sp|Q93052|LPP_HUMAN	1	12	12	3.9	65.746	0	66.054	44	1
sp|Q93077|H2A1C_HUMAN;sp|Q7L7L0|H2A3_HUMAN;sp|P04908|H2A1B_HUMAN	3	6;6;6	2;2;2	20	14.105	0	6.0425	5	1
sp|Q969G3|SMCE1_HUMAN	1	4	4	3.6	46.649	0	18.153	6	1
sp|Q969H8|MYDGF_HUMAN	1	2	2	8.7	18.795	0	16.704	24	1
sp|Q969V3|NCLN_HUMAN	1	11	11	5.7	62.974	0	42.653	19	1
sp|Q969Y2|GTPB3_HUMAN	1	3	3	4.7	52.058	0	5.6863	5	1
sp|Q96A26|F162A_HUMAN	1	1	1	7.1	17.342	0	40.034	1	1
sp|Q96A33|CCD47_HUMAN	1	13	13	15.7	55.873	0	198.33	89	1
sp|Q96A49|SYAP1_HUMAN	1	5	5	11.6	39.933	0	16.117	25	1
sp|Q96A72|MGN2_HUMAN	1	3	1	13.5	17.276	0	11.319	3	1
sp|Q96AB3|ISOC2_HUMAN	1	5	5	17.6	22.337	0	87.288	25	1
sp|Q96AE4|FUBP1_HUMAN	1	15	15	17.9	67.56	0	220.35	208	1
sp|Q96AG4|LRC59_HUMAN	1	11	11	39.4	34.93	0	284.05	172	1
sp|Q96AT9|RPE_HUMAN	1	1	1	8.3	24.927	0	20.051	5	1
sp|Q96AY3|FKB10_HUMAN	1	11	11	9.3	64.244	0	35.84	47	1
sp|Q96B49|TOM6_HUMAN	1	2	2	56.8	8.0019	0	34.433	14	1
sp|Q96B97|SH3K1_HUMAN	1	5	5	1.4	73.125	0	13.969	6	1
sp|Q96BR5|COA7_HUMAN	1	5	5	6.5	25.709	0	18.501	10	1
sp|Q96BX8|MOB3A_HUMAN	1	2	2	6.9	25.464	0.0094037	1.402	1	1
sp|Q96C01|F136A_HUMAN	1	3	3	5.1	15.641	0	28.829	12	1
sp|Q96C19|EFHD2_HUMAN;sp|Q9BUP0|EFHD1_HUMAN	2	6;2	6;2	30.8	26.697	0	29.156	13	1
sp|Q96C36|P5CR2_HUMAN	1	6	5	14.4	33.637	0	85.621	63	1
sp|Q96CB9|NSUN4_HUMAN	1	4	4	2.9	43.088	0	13.09	7	1
sp|Q96CM8|ACSF2_HUMAN	1	6	6	7.3	68.124	0	100.82	30	1
sp|Q96CS3|FAF2_HUMAN	1	7	7	22	52.623	0	112.7	43	1
sp|Q96CU9|FXRD1_HUMAN	1	2	2	2.7	53.811	0	4.8916	5	1
sp|Q96CV9|OPTN_HUMAN	1	2	2	2.6	65.92	0	16.001	4	1
sp|Q96CW1|AP2M1_HUMAN	1	7	7	3.4	49.654	0	55.463	30	1
sp|Q96D46|NMD3_HUMAN	1	5	5	3.4	57.603	0	48.652	38	1
sp|Q96DA2|RB39B_HUMAN	1	1	1	6.1	24.622	0.0055037	1.8168	4	1
sp|Q96DB5|RMD1_HUMAN	1	5	5	4.1	35.808	0	38.333	19	1
sp|Q96DI7|SNR40_HUMAN	1	6	6	16.2	39.31	0	60.648	10	1
sp|Q96DV4|RM38_HUMAN	1	8	8	5	44.596	0	71.029	21	1
sp|Q96DZ1|ERLEC_HUMAN	1	6	6	4.1	54.858	0	20.302	16	1
sp|Q96E11|RRFM_HUMAN	1	6	6	3.1	29.277	0	32.689	14	1
sp|Q96E39|RMXL1_HUMAN;sp|P38159|RBMX_HUMAN	2	1;1	1;1	3.3	42.141	0	12.242	7	1
sp|Q96EP5|DAZP1_HUMAN	1	4	4	3.9	43.383	0	34.148	13	1
sp|Q96ER9|CCD51_HUMAN	1	3	3	5.4	45.811	0	36.419	14	1
sp|Q96EY1|DNJA3_HUMAN	1	4	4	5	52.488	0	14.029	12	1
sp|Q96EY5|MB12A_HUMAN	1	4	4	11	28.783	0	14.06	7	1
sp|Q96EY7|PTCD3_HUMAN	1	11	11	5.4	78.549	0	103.47	50	1
sp|Q96FJ2|DYL2_HUMAN	1	2	2	32.6	10.35	0	19.358	3	1
sp|Q96FV9|THOC1_HUMAN	1	10	10	5.5	75.665	0	40.586	16	1
sp|Q96FW1|OTUB1_HUMAN	1	2	2	5.5	31.284	0	10.011	7	1
sp|Q96FX7|TRM61_HUMAN	1	2	2	3.5	31.381	0	3.8926	3	1
sp|Q96FZ5|CKLF7_HUMAN	1	1	1	18.9	18.834	0	5.6769	3	1
sp|Q96G03|PGM2_HUMAN	1	4	4	2.8	68.283	0	8.505	4	1
sp|Q96GC5|RM48_HUMAN	1	2	2	5.2	23.934	0	4.8818	4	1
sp|Q96GG9|DCNL1_HUMAN	1	3	3	11.2	30.124	0	25.89	3	1
sp|Q96GK7|FAH2A_HUMAN	1	7	3	4.1	34.596	0	24.265	14	1
sp|Q96H20|SNF8_HUMAN	1	2	2	4.7	28.864	0	5.4613	5	1
sp|Q96HC4|PDLI5_HUMAN	1	9	9	8.7	63.944	0	180.36	98	1
sp|Q96HE7|ERO1A_HUMAN;sp|Q86YB8|ERO1B_HUMAN	2	13;1	13;1	17.9	54.392	0	227.64	58	1
sp|Q96HQ2|C2AIL_HUMAN	1	3	3	31.9	13.196	0	61.419	39	1
sp|Q96HR8|NAF1_HUMAN	1	1	1	3	53.716	0	4.8373	4	1
sp|Q96HR9|REEP6_HUMAN	1	1	1	7.1	20.733	0	4.839	11	1
sp|Q96HS1|PGAM5_HUMAN	1	3	3	3.5	32.004	0	5.0528	5	1
sp|Q96HY6|DDRGK_HUMAN	1	4	4	15.9	35.61	0	12.466	7	1
sp|Q96I24|FUBP3_HUMAN	1	17	17	21.9	61.64	0	134.26	66	1
sp|Q96I25|SPF45_HUMAN	1	5	5	13.5	44.961	0	29.367	9	1
sp|Q96I99|SUCB2_HUMAN	1	12	12	19.2	46.51	0	107.81	71	1
sp|Q96IG2|FXL20_HUMAN	1	6	6	1.8	48.423	0	18.915	9	1
sp|Q96IX5|USMG5_HUMAN	1	2	2	43.1	6.4575	0	6.3899	18	1
sp|Q96IZ0|PAWR_HUMAN	1	4	4	13.5	36.567	0	55.488	37	1
sp|Q96J84|KIRR1_HUMAN	1	8	8	2.9	83.535	0	57.884	14	1
sp|Q96JB2|COG3_HUMAN	1	10	10	3.3	94.095	0	45.1	39	1
sp|Q96JB5|CK5P3_HUMAN	1	5	5	5.7	56.92	0	12.565	14	1
sp|Q96JJ7|TMX3_HUMAN	1	4	4	5.3	51.871	0	17.424	13	1
sp|Q96K17|BT3L4_HUMAN	1	2	2	19	17.27	0	14.19	6	1
sp|Q96KA5|CLP1L_HUMAN	1	1	1	2.4	62.228	0.0036864	2.1188	1	1
sp|Q96KN1|FA84B_HUMAN	1	2	2	4.8	34.474	0	9.7613	2	1
sp|Q96KP4|CNDP2_HUMAN	1	7	7	9.7	52.878	0	20.599	16	1
sp|Q96KQ7|EHMT2_HUMAN	1	2	2	2.2	132.37	0	18.803	8	1
sp|Q96M27|PRRC1_HUMAN	1	5	5	2.9	46.701	0	18.821	8	1
sp|Q96MW5|COG8_HUMAN	1	4	4	1.8	68.423	0	12.329	6	1
sp|Q96NE9|FRMD6_HUMAN	1	2	2	1.9	72.043	0.0057279	1.7947	2	1
sp|Q96P48|ARAP1_HUMAN	1	6	6	1	162.19	0	46.49	18	1
sp|Q96P70|IPO9_HUMAN	1	10	10	7.6	115.96	0	48.84	22	1
sp|Q96PD2|DCBD2_HUMAN	1	6	6	3.6	85.034	0	27.745	16	1
sp|Q96PK6|RBM14_HUMAN	1	4	4	2.4	69.491	0	72.076	51	1
sp|Q96PU8|QKI_HUMAN	1	6	6	7.3	37.67	0	94.82	51	1
sp|Q96Q05|TPPC9_HUMAN	1	4	4	1.1	128.53	0	6.8516	3	1
sp|Q96Q06|PLIN4_HUMAN	1	16	16	2	134.43	0	82.444	44	1
sp|Q96QD8|S38A2_HUMAN	1	3	3	4.2	56.025	0	11.789	5	1
sp|Q96QK1|VPS35_HUMAN	1	12	12	11.9	91.706	0	146.56	94	1
sp|Q96RE7|NACC1_HUMAN	1	7	7	4.9	57.258	0	49.359	10	1
sp|Q96RP9|EFGM_HUMAN	1	19	19	14.6	83.471	0	176.08	140	1
sp|Q96RQ3|MCCA_HUMAN	1	9	9	1.5	80.472	0	73.926	23	1
sp|Q96RT1|LAP2_HUMAN	1	14	14	3.4	158.3	0	68.254	28	1
sp|Q96S52|PIGS_HUMAN	1	4	4	3.8	61.655	0	116.36	35	1
sp|Q96S55|WRIP1_HUMAN	1	2	2	2.1	72.132	0	7.8716	5	1
sp|Q96SB3|NEB2_HUMAN	1	5	5	1.8	89.191	0	20.183	7	1
sp|Q96ST2|IWS1_HUMAN	1	3	3	2.3	91.954	0	19.01	8	1
sp|Q96ST3|SIN3A_HUMAN	1	6	6	0.8	145.17	0	16.052	6	1
sp|Q96T51|RUFY1_HUMAN	1	8	8	3.2	79.817	0	8.5492	9	1
sp|Q96T76|MMS19_HUMAN	1	6	6	1.7	113.29	0	21.361	6	1
sp|Q96TA1|NIBL1_HUMAN	1	11	11	8.4	84.137	0	108.27	51	1
sp|Q99102|MUC4_HUMAN	1	12	12	2.6	231.52	0	97.595	38	1
sp|Q99436|PSB7_HUMAN	1	3	3	6.9	29.965	0	19.165	27	1
sp|Q99439|CNN2_HUMAN	1	9	8	33.3	33.697	0	114.79	51	1
sp|Q99459|CDC5L_HUMAN	1	11	11	6	92.25	0	50.621	27	1
sp|Q99460|PSMD1_HUMAN	1	26	26	21.6	105.84	0	226.1	111	1
sp|Q99470|SDF2_HUMAN	1	2	2	11.4	23.026	0	30.542	6	1
sp|Q99471|PFD5_HUMAN	1	4	4	42.9	17.328	0	114.19	100	1
sp|Q99497|PARK7_HUMAN	1	7	7	28.6	19.891	0	121.51	59	1
sp|Q99519|NEUR1_HUMAN	1	5	5	6	45.467	0	20.532	38	1
sp|Q99523|SORT_HUMAN	1	2	2	3.2	92.067	0	14.067	6	1
sp|Q99536|VAT1_HUMAN	1	10	10	14	41.92	0	81.726	53	1
sp|Q99538|LGMN_HUMAN	1	2	2	3.9	49.411	0	12.713	8	1
sp|Q99567|NUP88_HUMAN	1	8	8	9.3	83.541	0	61.727	18	1
sp|Q99613|EIF3C_HUMAN;sp|B5ME19|EIFCL_HUMAN	2	10;10	10;10	9.5	105.34	0	107.98	47	1
sp|Q99615|DNJC7_HUMAN	1	2	2	3.6	56.44	0	11.938	4	1
sp|Q99622|C10_HUMAN	1	2	2	11.9	13.178	0	14.707	10	1
sp|Q99623|PHB2_HUMAN	1	10	10	22.4	33.296	0	217.1	125	1
sp|Q99627|CSN8_HUMAN	1	3	3	6.7	23.225	0	8.8535	10	1
sp|Q99653|CHP1_HUMAN	1	5	5	11.3	22.456	0	18.633	13	1
sp|Q99666|RGPD5_HUMAN;sp|O14715|RGPD8_HUMAN	2	6;6	1;1	0.7	198.92	0.0013175	2.8586	1	1
sp|Q99700|ATX2_HUMAN	1	3	3	0.8	140.28	0	5.4093	7	1
sp|Q99714|HCD2_HUMAN	1	13	13	60.5	26.923	0	162.06	130	1
sp|Q99720|SGMR1_HUMAN	1	2	2	5.4	25.127	0	3.983	6	1
sp|Q99733|NP1L4_HUMAN	1	5	5	12.3	42.823	0	42.224	23	1
sp|Q99747|SNAG_HUMAN	1	4	4	3.2	34.746	0	16.97	21	1
sp|Q99798|ACON_HUMAN	1	25	25	26.5	85.424	0	323.31	245	1
sp|Q99816|TS101_HUMAN	1	5	5	7.9	43.944	0	45.547	19	1
sp|Q99828|CIB1_HUMAN	1	3	3	6.8	21.703	0	9.1009	11	1
sp|Q99829|CPNE1_HUMAN	1	7	7	7.4	59.058	0	60.037	35	1
sp|Q99832|TCPH_HUMAN	1	19	19	36.3	59.366	0	248.28	121	1
sp|Q99873|ANM1_HUMAN	1	15	12	23.5	41.515	0	116.12	63	1
sp|Q99878|H2A1J_HUMAN;sp|Q96KK5|H2A1H_HUMAN;sp|Q9BTM1|H2AJ_HUMAN;sp|Q16777|H2A2C_HUMAN;sp|Q6FI13|H2A2A_HUMAN;sp|P20671|H2A1D_HUMAN;sp|P0C0S8|H2A1_HUMAN;sp|Q96QV6|H2A1A_HUMAN;sp|P16104|H2AX_HUMAN;sp|Q8IUE6|H2A2B_HUMAN	10	6;6;6;6;6;6;6;3;3;1	2;2;2;2;2;2;2;0;0;0	28.9	13.936	0	143.87	194	1
sp|Q99880|H2B1L_HUMAN;sp|Q99879|H2B1M_HUMAN;sp|Q99877|H2B1N_HUMAN;sp|Q93079|H2B1H_HUMAN;sp|Q5QNW6|H2B2F_HUMAN;sp|P62807|H2B1C_HUMAN;sp|P58876|H2B1D_HUMAN;sp|P57053|H2BFS_HUMAN;sp|O60814|H2B1K_HUMAN;sp|Q96A08|H2B1A_HUMAN	10	5;5;5;5;5;5;5;5;5;3	1;1;1;1;1;1;1;1;1;0	19	13.952	0.0070721	1.6459	1	1
sp|Q99961|SH3G1_HUMAN;sp|Q99962|SH3G2_HUMAN	2	5;2	5;2	10.1	41.489	0	19.432	10	1
sp|Q99996|AKAP9_HUMAN	1	8	8	0.8	453.66	0	10.257	9	1
sp|Q9BPW8|NIPS1_HUMAN	1	4	4	4.9	33.31	0	10.745	9	1
sp|Q9BPX5|ARP5L_HUMAN	1	3	3	8.5	16.941	0	111.88	18	1
sp|Q9BQ67|GRWD1_HUMAN	1	5	5	9.2	49.419	0	24.102	15	1
sp|Q9BQ95|ECSIT_HUMAN	1	6	6	3.5	49.148	0	15.26	9	1
sp|Q9BQA1|MEP50_HUMAN	1	6	6	25.7	36.724	0	76.032	32	1
sp|Q9BQC3|DPH2_HUMAN	1	2	2	3.9	52.082	0	10.594	5	1
sp|Q9BQE3|TBA1C_HUMAN	1	18	4	51	49.895	0	260.1	77	1
sp|Q9BQE5|APOL2_HUMAN	1	2	2	3.3	37.092	0	6.7054	2	1
sp|Q9BQI0|AIF1L_HUMAN	1	1	1	10.7	17.068	0	8.5384	3	1
sp|Q9BQS8|FYCO1_HUMAN	1	8	8	1.3	166.98	0	13.788	8	1
sp|Q9BR76|COR1B_HUMAN	1	4	4	7.6	54.234	0	11.211	11	1
sp|Q9BRA2|TXD17_HUMAN	1	2	2	11.4	13.941	0	14.261	6	1
sp|Q9BRJ2|RM45_HUMAN	1	5	5	12.1	35.351	0	20.876	28	1
sp|Q9BRJ6|CG050_HUMAN	1	3	3	10.8	22.083	0	11.524	12	1
sp|Q9BRK5|CAB45_HUMAN	1	5	5	11.3	41.806	0	13.807	19	1
sp|Q9BRR6|ADPGK_HUMAN	1	2	2	3.2	54.088	0	9.1915	2	1
sp|Q9BRT3|MIEN1_HUMAN	1	1	1	9.6	12.403	0.00079936	2.9498	1	1
sp|Q9BRX8|F213A_HUMAN	1	3	3	5.2	25.764	0	8.3078	6	1
sp|Q9BRZ2|TRI56_HUMAN	1	5	5	1.9	81.487	0	25.36	7	1
sp|Q9BS26|ERP44_HUMAN	1	8	8	14.3	46.971	0	61.335	37	1
sp|Q9BSH4|TACO1_HUMAN	1	5	5	13.8	32.477	0	107.94	22	1
sp|Q9BSJ8|ESYT1_HUMAN	1	14	14	6.2	122.85	0	101.14	91	1
sp|Q9BSY4|CHCH5_HUMAN	1	5	5	60.9	12.395	0	21.994	16	1
sp|Q9BT78|CSN4_HUMAN	1	11	11	3	46.268	0	161.4	32	1
sp|Q9BTD8|RBM42_HUMAN	1	5	5	10.2	50.413	0	40.319	24	1
sp|Q9BTT0|AN32E_HUMAN	1	5	5	15.3	30.692	0	175.7	42	1
sp|Q9BTT6|LRRC1_HUMAN	1	8	6	7.3	59.241	0	13.239	10	1
sp|Q9BTW9|TBCD_HUMAN	1	8	8	1.8	132.6	0	47.72	16	1
sp|Q9BTY7|HGH1_HUMAN	1	5	5	6.2	42.129	0	15.782	6	1
sp|Q9BUB7|TMM70_HUMAN	1	1	1	4.6	28.969	0.001294	2.6904	3	1
sp|Q9BUF5|TBB6_HUMAN	1	11	4	24.4	49.857	0	15.894	16	1
sp|Q9BUJ2|HNRL1_HUMAN	1	12	12	6.3	95.737	0	99.043	44	1
sp|Q9BUL8|PDC10_HUMAN	1	3	3	4.7	24.701	0	10.823	4	1
sp|Q9BUR5|MIC26_HUMAN	1	2	2	5.6	22.284	0	6.8281	7	1
sp|Q9BV20|MTNA_HUMAN	1	3	3	3.5	39.149	0	9.2646	4	1
sp|Q9BV38|WDR18_HUMAN	1	5	5	8.6	47.405	0	10.295	7	1
sp|Q9BVA1|TBB2B_HUMAN;sp|Q13885|TBB2A_HUMAN;sp|A6NNZ2|TBB8L_HUMAN;sp|Q9H4B7|TBB1_HUMAN;CON__ENSEMBL:ENSBTAP00000025008	5	13;13;3;2;2	2;2;0;0;0	29.9	49.953	0	16.271	14	1
sp|Q9BVC6|TM109_HUMAN	1	1	1	4.9	26.21	0	19.283	3	1
sp|Q9BVK6|TMED9_HUMAN	1	4	3	11.1	27.277	0	63.772	22	1
sp|Q9BVL4|SELO_HUMAN	1	4	4	4.8	73.488	0	27.414	16	1
sp|Q9BVS5|TR61B_HUMAN	1	1	1	2.5	52.965	0.0017866	2.5583	1	1
sp|Q9BW27|NUP85_HUMAN	1	5	5	4.7	75.019	0	26.539	10	1
sp|Q9BW60|ELOV1_HUMAN	1	2	2	4.7	32.662	0	6.5457	4	1
sp|Q9BW92|SYTM_HUMAN	1	3	3	1.3	81.035	0	25.417	4	1
sp|Q9BWD1|THIC_HUMAN	1	4	4	8.6	41.35	0	25.107	19	1
sp|Q9BWF3|RBM4_HUMAN	1	5	3	7.7	40.313	0	42.905	27	1
sp|Q9BWJ5|SF3B5_HUMAN	1	1	1	17.4	10.135	0	4.4926	3	1
sp|Q9BWM7|SFXN3_HUMAN	1	9	8	13.2	35.978	0	58.138	60	1
sp|Q9BWS9|CHID1_HUMAN	1	2	2	6.6	44.94	0	10.659	10	1
sp|Q9BX68|HINT2_HUMAN	1	3	3	9.2	17.162	0	16.536	18	1
sp|Q9BXB4|OSB11_HUMAN;sp|Q9BXB5|OSB10_HUMAN	2	6;1	6;1	1.3	83.642	0	10.083	8	1
sp|Q9BXJ9|NAA15_HUMAN	1	8	7	2.4	101.27	0	9.5745	15	1
sp|Q9BXP5|SRRT_HUMAN	1	8	8	7.1	100.67	0	25.11	37	1
sp|Q9BXS5|AP1M1_HUMAN	1	10	8	18.4	48.586	0	47.529	51	1
sp|Q9BY44|EIF2A_HUMAN	1	8	8	2.7	64.989	0	30.347	15	1
sp|Q9BY77|PDIP3_HUMAN	1	9	9	5.7	46.089	0	51.461	19	1
sp|Q9BYD2|RM09_HUMAN	1	5	5	4.5	30.243	0	17.038	15	1
sp|Q9BYD6|RM01_HUMAN	1	5	5	16.9	36.908	0	53.937	54	1
sp|Q9BYM8|HOIL1_HUMAN	1	6	6	2.2	57.571	0	16.386	29	1
sp|Q9BYT8|NEUL_HUMAN	1	11	11	5.4	80.651	0	36.205	40	1
sp|Q9BZE1|RM37_HUMAN	1	3	3	3.8	48.117	0	6.6544	5	1
sp|Q9BZF9|UACA_HUMAN	1	17	17	6.6	162.5	0	93.53	69	1
sp|Q9BZJ0|CRNL1_HUMAN	1	8	8	3.4	100.45	0	15.846	7	1
sp|Q9BZK7|TBL1R_HUMAN	1	11	10	15.6	55.594	0	180.29	61	1
sp|Q9BZZ5|API5_HUMAN	1	11	11	16.4	59.004	0	45.09	47	1
sp|Q9C005|DPY30_HUMAN	1	3	3	11.1	11.25	0	18.437	2	1
sp|Q9C0C2|TB182_HUMAN	1	26	26	13.2	181.79	0	127.42	78	1
sp|Q9C0H2|TTYH3_HUMAN	1	1	1	2.7	57.544	0	4.4301	5	1
sp|Q9GZL7|WDR12_HUMAN	1	8	8	15.4	47.707	0	90.798	56	1
sp|Q9GZS1|RPA49_HUMAN	1	2	2	2.9	53.961	0	11.133	7	1
sp|Q9GZS3|WDR61_HUMAN	1	6	6	17.7	33.58	0	51.01	29	1
sp|Q9GZT3|SLIRP_HUMAN	1	6	6	44	12.349	0	19.407	27	1
sp|Q9GZY8|MFF_HUMAN	1	2	2	10.8	38.464	0	3.6706	5	1
sp|Q9GZZ1|NAA50_HUMAN	1	5	5	7.7	19.398	0	12.626	10	1
sp|Q9H074|PAIP1_HUMAN	1	6	6	10.9	53.524	0	38.513	30	1
sp|Q9H078|CLPB_HUMAN	1	6	6	2.7	78.728	0	34.618	12	1
sp|Q9H0B6|KLC2_HUMAN	1	6	4	4.2	68.934	0	17.25	9	1
sp|Q9H0D6|XRN2_HUMAN	1	7	7	2.3	108.58	0	23.708	11	1
sp|Q9H0E2|TOLIP_HUMAN	1	5	5	15.7	30.281	0	29.839	10	1
sp|Q9H0F6|SHRPN_HUMAN	1	4	4	3.1	39.949	0	7.3946	4	1
sp|Q9H0L4|CSTFT_HUMAN	1	7	4	10.9	64.436	0	80.028	26	1
sp|Q9H0N0|RAB6C_HUMAN	1	1	1	8.7	28.355	0	5.3678	3	1
sp|Q9H0P0|5NT3A_HUMAN	1	2	2	4.8	37.948	0	11.011	6	1
sp|Q9H0S4|DDX47_HUMAN	1	4	4	4	50.646	0	7.9136	6	1
sp|Q9H0U4|RAB1B_HUMAN;sp|Q92928|RAB1C_HUMAN	2	6;3	3;1	25.9	22.171	0	173.06	118	1
sp|Q9H223|EHD4_HUMAN	1	13	12	8.3	61.174	0	90.252	35	1
sp|Q9H2U2|IPYR2_HUMAN	1	8	8	15.3	37.92	0	71.214	36	1
sp|Q9H2W6|RM46_HUMAN	1	3	3	9.7	31.705	0	10.812	10	1
sp|Q9H307|PININ_HUMAN	1	4	4	2.2	81.613	0	19.899	6	1
sp|Q9H3N1|TMX1_HUMAN	1	4	4	15.7	31.791	0	125.16	30	1
sp|Q9H3P2|NELFA_HUMAN	1	4	4	2.7	57.276	0	9.1398	5	1
sp|Q9H3P7|GCP60_HUMAN	1	9	9	9.1	60.593	0	33.289	12	1
sp|Q9H3Q1|BORG4_HUMAN	1	5	5	9.8	37.979	0	43.895	9	1
sp|Q9H3S7|PTN23_HUMAN	1	13	13	1	178.97	0	47.623	31	1
sp|Q9H3Z4|DNJC5_HUMAN	1	2	2	12.6	22.149	0	26.904	8	1
sp|Q9H444|CHM4B_HUMAN	1	3	3	13.4	24.95	0	7.2916	5	1
sp|Q9H488|OFUT1_HUMAN	1	7	7	5.4	43.955	0	72.192	30	1
sp|Q9H4A3|WNK1_HUMAN;sp|Q96J92|WNK4_HUMAN;sp|Q9BYP7|WNK3_HUMAN	3	7;1;1	5;0;0	1	250.79	0	12.275	13	1
sp|Q9H4L5|OSBL3_HUMAN	1	10	9	3.8	101.22	0	28.624	19	1
sp|Q9H4M9|EHD1_HUMAN	1	12	9	9.2	60.626	0	124.05	42	1
sp|Q9H583|HEAT1_HUMAN	1	11	11	0.5	242.37	0	28.298	19	1
sp|Q9H5V8|CDCP1_HUMAN	1	10	10	4.2	92.931	0	26.876	30	1
sp|Q9H6T3|RPAP3_HUMAN	1	10	10	1.7	75.718	0	34.079	17	1
sp|Q9H6V9|LDAH_HUMAN	1	3	3	4.3	37.318	0	5.926	9	1
sp|Q9H773|DCTP1_HUMAN	1	3	3	5.9	18.681	0	7.5019	5	1
sp|Q9H7E9|CH033_HUMAN	1	1	1	7	24.992	0	6.5149	1	1
sp|Q9H7F0|AT133_HUMAN	1	10	10	1.1	138.04	0	25.858	13	1
sp|Q9H845|ACAD9_HUMAN	1	4	4	4	68.76	0	15.27	12	1
sp|Q9H871|RMD5A_HUMAN	1	3	3	3.3	43.992	0	5.738	4	1
sp|Q9H8H0|NOL11_HUMAN	1	9	9	7.9	81.123	0	42.053	17	1
sp|Q9H8S9|MOB1A_HUMAN;sp|Q7L9L4|MOB1B_HUMAN	2	2;2	2;2	3.2	25.079	0	12.888	4	1
sp|Q9H8Y8|GORS2_HUMAN	1	5	5	14.6	47.145	0	60.464	64	1
sp|Q9H910|HN1L_HUMAN	1	4	4	7.4	20.063	0	19.785	25	1
sp|Q9H936|GHC1_HUMAN;sp|Q9H1K4|GHC2_HUMAN	2	7;2	7;2	13.3	34.47	0	27.772	33	1
sp|Q9H993|ARMT1_HUMAN	1	3	3	6.1	51.172	0	11.439	4	1
sp|Q9H9B1|EHMT1_HUMAN	1	3	3	1.2	141.46	0	8.6126	4	1
sp|Q9H9B4|SFXN1_HUMAN	1	8	7	38.8	35.619	0	179.65	77	1
sp|Q9H9E3|COG4_HUMAN	1	10	10	1.8	89.082	0	71.738	12	1
sp|Q9H9H4|VP37B_HUMAN	1	7	7	12.3	31.307	0	121.69	21	1
sp|Q9H9J2|RM44_HUMAN	1	6	6	25.6	37.535	0	93.209	25	1
sp|Q9HA77|SYCM_HUMAN	1	4	4	3.2	62.223	0	15.57	15	1
sp|Q9HAV4|XPO5_HUMAN	1	6	6	0.6	136.31	0	16.616	10	1
sp|Q9HAV7|GRPE1_HUMAN	1	5	5	16.1	24.279	0	10.537	12	1
sp|Q9HB09|B2L12_HUMAN	1	1	1	2.4	36.821	0.009206	1.4294	2	1
sp|Q9HB40|RISC_HUMAN	1	5	5	6.9	50.83	0	61.217	12	1
sp|Q9HB71|CYBP_HUMAN	1	7	7	22.8	26.21	0	255.11	21	1
sp|Q9HBM1|SPC25_HUMAN	1	1	1	4.9	26.152	0	3.4664	3	1
sp|Q9HC35|EMAL4_HUMAN	1	10	10	1.7	108.91	0	16.566	22	1
sp|Q9HC36|MRM3_HUMAN	1	3	3	2.9	47.019	0	11.405	6	1
sp|Q9HCC0|MCCB_HUMAN	1	10	10	11.7	61.332	0	96.119	34	1
sp|Q9HCS7|SYF1_HUMAN	1	10	10	11	100.01	0	40.095	23	1
sp|Q9HCY8|S10AE_HUMAN	1	1	1	14.4	11.662	0	19.265	1	1
sp|Q9HD42|CHM1A_HUMAN	1	1	1	4.6	21.703	0	3.2349	6	1
sp|Q9HD45|TM9S3_HUMAN	1	3	3	3.1	67.887	0	17.118	20	1
sp|Q9HDC9|APMAP_HUMAN	1	9	9	24.8	46.48	0	52.012	60	1
sp|Q9NNW7|TRXR2_HUMAN	1	4	3	6.3	56.506	0	10.892	4	1
sp|Q9NP66|HM20A_HUMAN	1	3	3	3.5	40.143	0	6.7685	4	1
sp|Q9NP81|SYSM_HUMAN	1	10	10	6	58.282	0	47.529	28	1
sp|Q9NP97|DLRB1_HUMAN;sp|Q8TF09|DLRB2_HUMAN	2	3;1	3;1	12.5	10.921	0	17.269	13	1
sp|Q9NPF5|DMAP1_HUMAN	1	3	3	2.1	52.992	0	3.6758	2	1
sp|Q9NPH2|INO1_HUMAN	1	8	8	9	61.067	0	39.05	21	1
sp|Q9NPI6|DCP1A_HUMAN	1	3	3	2.6	63.309	0	3.2734	4	1
[truncated: 287 more rows]

## Sheet: MaxQuant-Results
Protein IDs	Majority protein IDs	Peptide counts (all)	Peptide counts (razor+unique)	Peptide counts (unique)	Fasta headers	Number of proteins	Peptides	Razor + unique peptides	Unique peptides	Peptides IEF	Peptides Unfractionated	Razor + unique peptides IEF	Razor + unique peptides Unfractionated	Unique peptides IEF	Unique peptides Unfractionated	Sequence coverage [%]	Unique + razor sequence coverage [%]	Unique sequence coverage [%]	Mol. weight [kDa]	Sequence length	Sequence lengths	Fraction average	Fraction 1	Fraction 2	Fraction 3	Fraction 4	Fraction 5	Fraction 6	Fraction 7	Fraction 8	Fraction 9	Fraction 10	Fraction 11	Fraction 12	Fraction 13	Fraction 14	Fraction 15	Fraction 16	Fraction 17	Fraction 18	Fraction 19	Fraction 20	Q-value	Score	Sequence coverage IEF [%]	Sequence coverage Unfractionated [%]	Intensity	Intensity IEF	Intensity Unfractionated
CON__ENSEMBL:ENSBTAP00000007350;CON__P01030	CON__ENSEMBL:ENSBTAP00000007350;CON__P01030	4;3	4;3	4;3	>ENSEMBL:ENSBTAP00000007350 (Bos taurus) similar to Complement C4-A precursor;>P01030 SWISS-PROT:P01030 (Bos taurus) similar to Complement C4-A precursor	2	4	4	4	4	0	4	0	4	0	3	3	3	192.99	1742	1742;1741	14.6									1					2				2			0	7.2585	3	0	104100	104100	0
CON__Q3MHN5;CON__ENSEMBL:ENSBTAP00000018229	CON__Q3MHN5;CON__ENSEMBL:ENSBTAP00000018229	2;2	2;2	1;1	>Q3MHN5 SWISS-PROT:Q3MHN5 (Bos taurus) Vitamin D-binding protein precursor;>ENSEMBL:ENSBTAP00000018229 (Bos taurus) 54 kDa protein	2	2	2	1	2	0	2	0	1	0	9.9	9.9	5.3	53.341	474	474;475	9.5									1	1											0	15.928	9.9	0	255240	255240	0
CON__ENSEMBL:ENSBTAP00000024146	CON__ENSEMBL:ENSBTAP00000024146	5	4	4	>ENSEMBL:ENSBTAP00000024146 (Bos taurus) similar to alpha-2-macroglobulin isoform 1	1	5	4	4	5	0	4	0	4	0	6.4	5.8	5.8	164.34	1477	1477	13.5										1		1		1				1			0	7.7759	6.4	0	429480	429480	0
CON__ENSEMBL:ENSBTAP00000032840	CON__ENSEMBL:ENSBTAP00000032840	5	5	5	>ENSEMBL:ENSBTAP00000032840 (Bos taurus) similar to apolipoprotein B, partial	1	5	5	5	5	0	5	0	5	0	8.1	8.1	8.1	92.273	825	825	11.8							1					2		2							0	9.2821	8.1	0	346980	346980	0
CON__ENSEMBL:ENSBTAP00000037665	CON__ENSEMBL:ENSBTAP00000037665	1	1	1	>ENSEMBL:ENSBTAP00000037665 (Bos taurus) similar to Pregnancy zone protein, partial	1	1	1	1	1	0	1	0	1	0	3.8	3.8	3.8	65.19	578	578	12.5												1	1								0	7.1113	3.8	0	90321	90321	0
CON__ENSEMBL:ENSBTAP00000038329;CON__REFSEQ:XP_001252647	CON__ENSEMBL:ENSBTAP00000038329;CON__REFSEQ:XP_001252647	1;1	1;1	1;1	>ENSEMBL:ENSBTAP00000038329 (Bos taurus) 9 kDa protein;>REFSEQ:XP_001252647 (Bos taurus) similar to endopin 2B	2	1	1	1	1	0	1	0	1	0	12.5	12.5	12.5	8.5787	80	80;417	11											1										0.0027268	2.2222	12.5	0	29525	29525	0
CON__ENSEMBL:ENSP00000377550;sp|P13646|K1C13_HUMAN;CON__P13646-1;CON__P02535-1	CON__ENSEMBL:ENSP00000377550;sp|P13646|K1C13_HUMAN;CON__P13646-1	4;4;4;1	2;2;2;1	2;2;2;1	>ENSEMBL:ENSP00000377550 Tax_Id=9606 Gene_Symbol=KRT13 46 kDa protein;>sp|P13646|K1C13_HUMAN Keratin, type I cytoskeletal 13 OS=Homo sapiens GN=KRT13 PE=1 SV=4;>P13646-1 SWISS-PROT:P13646-1 Tax_Id=9606 Gene_Symbol=KRT13 Isoform 1 of Keratin, type I cytoske	4	4	2	2	4	2	2	0	2	0	13.6	7.6	7.6	45.771	420	420;458;458;570	13								1										1			0	4.122	13.6	6	65734	65734	0
CON__P00761	CON__P00761	5	5	5	>P00761 SWISS-PROT:P00761|TRYP_PIG Trypsin - Sus scrofa (Pig).	1	5	5	5	5	4	5	4	5	4	33.3	33.3	33.3	24.409	231	231	10.1		3	2	3	3	1	3	2	5	2	6	4	4	2	1		2	1	3	1	0	293.31	33.3	27.3	76129000	70548000	5581900
CON__P01966	CON__P01966	5	5	3	>P01966 SWISS-PROT:P01966 (Bos taurus) Hemoglobin subunit alpha	1	5	5	3	4	2	4	2	2	1	52.1	52.1	34.5	15.184	142	142	15							1	1	1	1	1		1	2	4	3	3	2	2	2	0	29.306	41.5	16.9	4597000	3199800	1397300
sp|P48668|K2C6C_HUMAN;sp|P04259|K2C6B_HUMAN;sp|P02538|K2C6A_HUMAN;CON__P48668;CON__P04259;CON__P02538;sp|O95678|K2C75_HUMAN;CON__O95678;sp|P13647|K2C5_HUMAN;CON__P13647	sp|P48668|K2C6C_HUMAN;sp|P04259|K2C6B_HUMAN;sp|P02538|K2C6A_HUMAN;CON__P48668;CON__P04259;CON__P02538;sp|O95678|K2C75_HUMAN;CON__O95678;sp|P13647|K2C5_HUMAN;CON__P13647	5;5;5;5;5;5;3;3;3;3	2;2;2;2;2;2;1;1;1;1	1;1;1;1;1;1;0;0;0;0	>sp|P48668|K2C6C_HUMAN Keratin, type II cytoskeletal 6C OS=Homo sapiens GN=KRT6C PE=1 SV=3;>sp|P04259|K2C6B_HUMAN Keratin, type II cytoskeletal 6B OS=Homo sapiens GN=KRT6B PE=1 SV=5;>sp|P02538|K2C6A_HUMAN Keratin, type II cytoskeletal 6A OS=Homo sapiens GN	10	5	2	1	4	3	1	1	1	0	8.3	5.1	3	60.024	564	564;564;564;564;564;564;551;551;590;590	17.5																	1	1			0.0022664	2.3641	6.2	5	81317	17697	63620
sp|P02768|ALBU_HUMAN;CON__P02768-1	sp|P02768|ALBU_HUMAN;CON__P02768-1	38;38	38;38	35;35	>sp|P02768|ALBU_HUMAN Serum albumin OS=Homo sapiens GN=ALB PE=1 SV=2;>P02768-1 SWISS-PROT:P02768-1 Tax_Id=9606 Gene_Symbol=ALB Isoform 1 of Serum albumin precursor	2	38	38	35	38	18	38	18	35	18	59.4	59.4	57	69.366	609	609;609	11.5	28	54	52	40	48	28	62	76	70	66	99	65	71	64	77	86	55	64	64	82	0	323.31	59.4	38.4	541600000	518760000	22838000
120059;120060;120061;120062;120063;120064;120065;120066;120067;120068;120069;120070;120071;120072;120073;120074;120075;120076;120077;120078;120079;120080;120081;120082;120083;120084;120085;120086;120087;120088;120089;120090;120091;120092;121802;121803;121804;121805;121806;121807;121808;121809;121810;121811;121812;121813;121814;121815;121816;121817;121818;121819;121820;121821;121822;121823;121824;…	8899;9372;14666;25125;28964;29109;37817;39341;51058;51179;51285;64433;80321;81164;81719;81797;81950;85645;88075;92776;93981;95812;95846;96469;97611;97801;97897;98162;98256;98433;98448;101435;102912;108482;119985;121875;126509;133468	3;4;5;6;7	147;322;353;470;572
CON__P02769	CON__P02769	28	25	25	>P02769 SWISS-PROT:P02769 (Bos taurus) Bovine serum albumin precursor	1	28	25	25	21	12	18	12	18	12	54.2	50.6	50.6	69.293	607	607	8.51	5	7	3	4	5	8	7	11	14	10	8	7	6	4	1		1	1	2	1	0	323.31	40.2	24.4	63255000	51543000	11712000
CON__P02777	CON__P02777	1	1	1	>P02777 SWISS-PROT:P02777 (Bos taurus) similar to Platelet factor 4	1	1	1	1	1	0	1	0	1	0	4.8	4.8	4.8	24.241	230	230	12											1		1								0.0017894	2.5728	4.8	0	106850	106850	0
sp|P04264|K2C1_HUMAN;CON__P04264	sp|P04264|K2C1_HUMAN;CON__P04264	4;4	2;2	2;2	>sp|P04264|K2C1_HUMAN Keratin, type II cytoskeletal 1 OS=Homo sapiens GN=KRT1 PE=1 SV=6;>P04264 SWISS-PROT:P04264 Tax_Id=9606 Gene_Symbol=KRT1 Keratin, type II cytoskeletal 1	2	4	2	2	4	0	2	0	2	0	9.5	5.7	5.7	66.038	644	644;644	11.8							1		1					2	1						0	24.275	9.5	0	899520	899520	0
CON__P05784	CON__P05784	6	1	1	>P05784 SWISS-PROT:P05784 Tax_Id=10090 Gene_Symbol=Krt18 Keratin, type I cytoskeletal 18	1	6	1	1	4	5	0	1	0	1	14.7	4.7	4.7	47.538	423	423	NaN																					0	4.3131	7.6	14.7	137560	0	137560
sp|P05787|K2C8_HUMAN;CON__P05787;CON__H-INV:HIT000292931;CON__Q9H552;CON__H-INV:HIT000016045;CON__REFSEQ:XP_092267;sp|Q3SY84|K2C71_HUMAN;CON__Q3SY84;CON__P07744;sp|Q86Y46|K2C73_HUMAN;CON__Q32MB2;sp|Q9NSB2|KRT84_HUMAN;CON__Q9NSB2;CON__Q6ISB0;sp|P12035|K2C3_HUMAN;CON__P12035;sp|Q01546|K22O_HUMAN;CON__Q01546;CON__Q3TTY5	sp|P05787|K2C8_HUMAN;CON__P05787;CON__H-INV:HIT000292931	23;23;12;3;2;2;2;2;2;2;2;2;2;2;2;2;2;2;2	23;23;12;3;2;2;2;2;2;2;2;2;2;2;2;2;2;2;2	20;20;11;2;2;2;0;0;0;0;0;0;0;0;0;0;0;0;0	>sp|P05787|K2C8_HUMAN Keratin, type II cytoskeletal 8 OS=Homo sapiens GN=KRT8 PE=1 SV=7;>P05787 SWISS-PROT:P05787 Tax_Id=9606 Gene_Symbol=KRT8 Keratin, type II cytoskeletal 8;>H-INV:HIT000292931 Tax_Id=9606 Gene_Symbol=- Similar to Keratin, type II cytoske	19	23	23	20	23	17	23	17	20	15	59.4	59.4	55.7	53.704	483	483;483;443;499;99;213;523;523;525;540;540;600;600;600;628;629;638;638;707	7.13	11	13	12	12	24	33	33	26	21	6	3	3	2	3	3		1	4	4	4	0	323.31	59.4	53.4	447290000	320120000	127170000
CON__P08730-1	CON__P08730-1	3	1	1	>P08730-1 SWISS-PROT:P08730-1 Tax_Id=10090 Gene_Symbol=Krt13 Isoform 1 of Keratin, type I cytoskeletal 13	1	3	1	1	3	2	1	0	1	0	8.5	2.7	2.7	47.754	437	437	8								1													0.0029666	2.1885	8.5	5.7	139810	139810	0
CON__P12763	CON__P12763	5	5	5	>P12763 SWISS-PROT:P12763 (Bos taurus) Alpha-2-HS-glycoprotein precursor	1	5	5	5	4	4	4	4	4	4	24.5	24.5	24.5	38.418	359	359	9.63	4	4		2	3	2		2	5	2	2	3	4	1		2	2	1	2	2	0	323.31	19.8	21.4	30953000	26162000	4791100
sp|P13645|K1C10_HUMAN;CON__P13645	sp|P13645|K1C10_HUMAN;CON__P13645	3;3	3;3	3;3	>sp|P13645|K1C10_HUMAN Keratin, type I cytoskeletal 10 OS=Homo sapiens GN=KRT10 PE=1 SV=6;>P13645 SWISS-PROT:P13645 Tax_Id=9606 Gene_Symbol=KRT10 Keratin, type I cytoskeletal 10	2	3	3	3	3	0	3	0	3	0	9.4	9.4	9.4	58.826	584	584;593	15.4						1											2	1	1		0	3.4781	9.4	0	264040	264040	0
CON__P15497	CON__P15497	3	3	3	>P15497 SWISS-PROT:P15497 (Bos taurus) Apolipoprotein A-I precursor	1	3	3	3	2	3	2	3	2	3	13.6	13.6	13.6	30.276	265	265	7.57						1	2	3	1												0	27.292	10.2	13.6	3015400	1994700	1020700
CON__P34955	CON__P34955	4	4	4	>P34955 SWISS-PROT:P34955 (Bos taurus) Alpha-1-antiproteinase precursor	1	4	4	4	4	2	4	2	4	2	12	12	12	46.103	416	416	5.5	2	2	2	2	1	1	2	2	2	2											0	33.683	12	4.8	11564000	10052000	1511900
sp|P35900|K1C20_HUMAN;CON__P35900;CON__Q61782;sp|Q8N1A0|KT222_HUMAN;CON__Q8N1A0;CON__Q9D312;CON__Q9Z2K1;CON__Q3ZAW8	sp|P35900|K1C20_HUMAN;CON__P35900	10;10;1;1;1;1;1;1	9;9;0;0;0;0;0;0	9;9;0;0;0;0;0;0	>sp|P35900|K1C20_HUMAN Keratin, type I cytoskeletal 20 OS=Homo sapiens GN=KRT20 PE=1 SV=1;>P35900 SWISS-PROT:P35900 Tax_Id=9606 Gene_Symbol=KRT20 Keratin, type I cytoskeletal 20	8	10	9	9	7	8	6	7	6	7	33.3	31.1	31.1	48.486	424	424;424;93;295;295;431;469;474	10	2	3		1	1	3	2	4	2	4		1				2	2	2	2	2	0	210.9	25	26.4	14130000	10045000	4084900
CON__Q8BGZ7;CON__P50446;CON__Q5XQN5	CON__Q8BGZ7;CON__P50446;CON__Q5XQN5	4;4;3	1;1;1	0;0;0	>Q8BGZ7 TREMBL:Q8BGZ7;Q99MH7 Tax_Id=10090 Gene_Symbol=Krt75 10 days neonate skin cDNA, RIKEN full-length enriched library, clone:4732475I03 product:CYTOKERATIN homolog;>P50446 SWISS-PROT:P50446 Tax_Id=10090 Gene_Symbol=Krt6a Keratin, type II cytoskeletal 6	3	4	1	0	4	2	1	0	0	0	5.4	2.2	0	59.74	551	551;553;601	7							1														0	15.464	5.4	2.9	0	0	0
sp|P78386|KRT85_HUMAN;CON__P78386	sp|P78386|KRT85_HUMAN;CON__P78386	1;1	1;1	1;1	>sp|P78386|KRT85_HUMAN Keratin, type II cuticular Hb5 OS=Homo sapiens GN=KRT85 PE=1 SV=1;>P78386 SWISS-PROT:P78386 Keratin, type II cuticular Hb5 (Hair keratin, type II Hb5) - Homo sapiens (Human).	2	1	1	1	1	0	1	0	1	0	2.2	2.2	2.2	55.802	507	507;507	1	1																				0.0020361	2.5163	2.2	0	252870	252870	0
CON__P81644	CON__P81644	2	2	2	>P81644 SWISS-PROT:P81644 (Bos taurus) Apolipoprotein A-II precursor	1	2	2	2	1	2	1	2	1	2	26	26	26	11.202	100	100	5.86	1	1				1	1	2	1												0	23.177	10	26	3341100	2771300	569850
CON__Q29443;CON__Q0IIK2;sp|P02788|TRFL_HUMAN	CON__Q29443;CON__Q0IIK2	14;14;1	14;14;1	14;14;1	>Q29443 SWISS-PROT:Q29443 Serotransferrin - Bos taurus (Bovine).;>Q0IIK2 TREMBL:Q0IIK2 (Bos taurus) Transferrin	3	14	14	14	12	4	12	4	12	4	31.7	31.7	31.7	75.829	685	685;704;710	10.6					1	1	3	5	3	3	5	4	3	4			1	1			0	149.83	27.9	8.9	11267000	9923400	1343500
CON__Q2KJF1	CON__Q2KJF1	3	3	3	>Q2KJF1 TREMBL:Q2KJF1 (Bos taurus) Alpha-1-B glycoprotein	1	3	3	3	3	0	3	0	3	0	7.6	7.6	7.6	53.553	503	503	11.5								1	1	1									1		0	6.7981	7.6	0	200910	200910	0
CON__Q2UVX4	CON__Q2UVX4	3	2	2	>Q2UVX4 SWISS-PROT:Q2UVX4 (Bos taurus) Complement C3 precursor	1	3	2	2	3	0	2	0	2	0	3	2.3	2.3	187.37	1662	1662	12.2										1	1			2							0	5.5932	3	0	176030	176030	0
sp|P05156|CFAI_HUMAN;CON__Q32PI4	sp|P05156|CFAI_HUMAN;CON__Q32PI4	1;1	1;1	1;1	>sp|P05156|CFAI_HUMAN Complement factor I OS=Homo sapiens GN=CFI PE=1 SV=2;>Q32PI4 TREMBL:Q32PI4 (Bos taurus) Similar to complement factor I	2	1	1	1	1	0	1	0	1	0	2.2	2.2	2.2	65.75	583	583;618	9									1												0.00079851	2.9401	2.2	0	103360	103360	0
sp|P08729|K2C7_HUMAN;CON__Q3KNV1;CON__P08729;CON__Q9DCV7;sp|Q14CN4|K2C72_HUMAN;CON__Q14CN4-1;CON__Q6IME9;sp|P19013|K2C4_HUMAN;CON__P19013	sp|P08729|K2C7_HUMAN;CON__Q3KNV1;CON__P08729	22;22;20;4;3;3;3;2;2	20;20;18;2;1;1;1;1;1	20;20;18;2;1;1;1;1;1	>sp|P08729|K2C7_HUMAN Keratin, type II cytoskeletal 7 OS=Homo sapiens GN=KRT7 PE=1 SV=5;>Q3KNV1 TREMBL:Q3KNV1;Q96GE1 Tax_Id=9606 Gene_Symbol=KRT7 keratin 7;>P08729 SWISS-PROT:P08729 Tax_Id=9606 Gene_Symbol=KRT7 Keratin, type II cytoskeletal 7	9	22	20	20	18	15	16	14	16	14	56.9	55	55	51.385	469	469;469;469;457;511;511;520;534;594	7.28	9	9	8	5	9	8	11	9	9	1	2	3	2	4	3	3	2	1	1	1	0	323.31	50.7	47.8	98884000	69775000	29109000
CON__Q3SX09;CON__P02070;sp|P69892|HBG2_HUMAN;sp|P69891|HBG1_HUMAN;sp|P02100|HBE_HUMAN	CON__Q3SX09	5;1;1;1;1	5;1;1;1;1	4;0;0;0;0	>Q3SX09 TREMBL:Q3SX09 (Bos taurus) similar to HBG protein	5	5	5	4	4	2	4	2	3	2	32.8	32.8	27.9	22.06	201	201;145;147;147;147	9.32	1	2		1	2	4	3	4	2			1	1	1		1	1	2	1	1	0	30.895	26.9	15.4	6510900	5873700	637140
CON__Q3SZ57	CON__Q3SZ57	5	5	5	>Q3SZ57 SWISS-PROT:Q3SZ57 (Bos taurus) Alpha-fetoprotein precursor	1	5	5	5	5	0	5	0	5	0	11.1	11.1	11.1	68.587	610	610	14.7											1	1	1			1		2			0	12.112	11.1	0	285940	285940	0
CON__Q3SZV7	CON__Q3SZV7	1	1	1	>Q3SZV7 TREMBL:Q3SZV7 (Bos taurus) Similar to hemopexin	1	1	1	1	1	0	1	0	1	0	3.5	3.5	3.5	52.295	460	460	12												1									0	3.7804	3.5	0	65613	65613	0
CON__Q3ZBS7;sp|P04004|VTNC_HUMAN	CON__Q3ZBS7	5;1	5;1	5;1	>Q3ZBS7 TREMBL:Q3ZBS7 (Bos taurus) Vitronectin	2	5	5	5	4	1	4	1	4	1	13.4	13.4	13.4	54.099	484	484;478	8.43	1	1			1	1								1	1	1					0	19.69	10.3	3.1	535550	450180	85361
CON__Q58D62	CON__Q58D62	3	3	3	>Q58D62 SWISS-PROT:Q58D62 (Bos taurus) Fetuin-B precursor	1	3	3	3	3	0	3	0	3	0	15	15	15	42.663	387	387	15.7									1	2							1	2	1	2	0	7.9234	15	0	1051800	1051800	0
CON__Q8VED5;sp|Q5XKE5|K2C79_HUMAN;CON__Q5XKE5	CON__Q8VED5;sp|Q5XKE5|K2C79_HUMAN;CON__Q5XKE5	4;4;4	1;1;1	1;1;1	>Q8VED5 TREMBL:Q8VED5 Tax_Id=10090 Gene_Symbol=Krt79 Keratin 79;>sp|Q5XKE5|K2C79_HUMAN Keratin, type II cytoskeletal 79 OS=Homo sapiens GN=KRT79 PE=1 SV=2;>Q5XKE5 SWISS-PROT:Q5XKE5 Tax_Id=9606 Gene_Symbol=KRT79 Keratin, type II cytoskeletal 79	3	4	1	1	3	3	1	1	1	1	5.8	1.9	1.9	57.552	531	531;535;535	6.67					1	1			1												0.0013158	2.8431	3.6	5.5	593640	487120	106520
sp|Q6KB66|K2C80_HUMAN;CON__Q6KB66-1;CON__Q0VBK2	sp|Q6KB66|K2C80_HUMAN;CON__Q6KB66-1	7;7;1	7;7;1	7;7;1	>sp|Q6KB66|K2C80_HUMAN Keratin, type II cytoskeletal 80 OS=Homo sapiens GN=KRT80 PE=1 SV=2;>Q6KB66-1 SWISS-PROT:Q6KB66-1 Tax_Id=9606 Gene_Symbol=KRT80 Isoform 1 of Keratin, type II cytoskeletal 80	3	7	7	7	6	2	6	2	6	2	20.1	20.1	20.1	50.525	452	452;452;452	12.7									2	1	1	2	3	2			1	1			0	21.49	17	6.2	2742400	2410200	332140
sp|Q9C075|K1C23_HUMAN;CON__Q9C075;CON__Q99PS0	sp|Q9C075|K1C23_HUMAN;CON__Q9C075	6;6;1	6;6;1	6;6;1	>sp|Q9C075|K1C23_HUMAN Keratin, type I cytoskeletal 23 OS=Homo sapiens GN=KRT23 PE=1 SV=2;>Q9C075 SWISS-PROT:Q9C075 Tax_Id=9606 Gene_Symbol=KRT23 Keratin, type I cytoskeletal 23	3	6	6	6	4	3	4	3	4	3	18.5	18.5	18.5	48.131	422	422;422;422	10.8							1	1	1		2	3	2								0	27.002	12.3	8.8	2399500	2090000	309430
CON__Q9TRI1	CON__Q9TRI1	3	3	2	>Q9TRI1 TREMBL:Q9TRI1 (Bos taurus) similar to inter-alpha-trypsin inhibitor heavy chain2	1	3	3	2	2	1	2	1	1	1	4.9	4.9	3.3	106.19	946	946	14													1		1						0	16.907	3.6	1.3	217550	217550	0
REV__CON__Q7Z3Y8	REV__CON__Q7Z3Y8	1	1	1	>Q7Z3Y8 SWISS-PROT:Q7Z3Y8 Tax_Id=9606 Gene_Symbol=KRT27 Keratin, type I cytoskeletal 27	1	1	1	1	1	0	1	0	1	0	0	0	0	49.823	459	459	11.2									1		1	1	1								0.0092208	1.4478	0	0	520470	520470	0
REV__sp|A6NNT2|CP096_HUMAN	REV__sp|A6NNT2|CP096_HUMAN	2	2	2	>sp|A6NNT2|CP096_HUMAN Uncharacterized protein C16orf96 OS=Homo sapiens GN=C16orf96 PE=4 SV=3	1	2	2	2	2	1	2	1	2	1	0	0	0	125.04	1141	1141	5.4	1		1			1	1			1											0.0036973	2.143	0	0	2822600	2611400	211200
REV__sp|O00203|AP3B1_HUMAN	REV__sp|O00203|AP3B1_HUMAN	1	1	1	>sp|O00203|AP3B1_HUMAN AP-3 complex subunit beta-1 OS=Homo sapiens GN=AP3B1 PE=1 SV=3	1	1	1	1	1	0	1	0	1	0	0	0	0	121.32	1094	1094	18																		1			0.0022768	2.4441	0	0	144230	144230	0
REV__sp|O00429|DNM1L_HUMAN	REV__sp|O00429|DNM1L_HUMAN	1	1	1	>sp|O00429|DNM1L_HUMAN Dynamin-1-like protein OS=Homo sapiens GN=DNM1L PE=1 SV=2	1	1	1	1	1	0	1	0	1	0	0	0	0	81.876	736	736	7							1														0.0041222	1.9844	0	0	998070	998070	0
REV__sp|O00522|KRIT1_HUMAN	REV__sp|O00522|KRIT1_HUMAN	1	1	1	>sp|O00522|KRIT1_HUMAN Krev interaction trapped protein 1 OS=Homo sapiens GN=KRIT1 PE=1 SV=2	1	1	1	1	1	0	1	0	1	0	0	0	0	84.347	736	736	16.5																1	1				0.0077374	1.5899	0	0	163010	163010	0
REV__sp|O14594|NCAN_HUMAN	REV__sp|O14594|NCAN_HUMAN	1	1	1	>sp|O14594|NCAN_HUMAN Neurocan core protein OS=Homo sapiens GN=NCAN PE=1 SV=3	1	1	1	1	1	0	1	0	1	0	0	0	0	143.09	1321	1321	8								2													0.0013207	2.8775	0	0	3755800	3755800	0
REV__sp|O15041|SEM3E_HUMAN	REV__sp|O15041|SEM3E_HUMAN	1	1	1	>sp|O15041|SEM3E_HUMAN Semaphorin-3E OS=Homo sapiens GN=SEMA3E PE=1 SV=1	1	1	1	1	1	0	1	0	1	0	0	0	0	89.227	775	775	5					1																0.0072873	1.6263	0	0	48668	48668	0
REV__sp|O43903|GAS2_HUMAN	REV__sp|O43903|GAS2_HUMAN	1	1	1	>sp|O43903|GAS2_HUMAN Growth arrest-specific protein 2 OS=Homo sapiens GN=GAS2 PE=1 SV=1	1	1	1	1	1	0	1	0	1	0	0	0	0	34.945	313	313	9									1												0.0063905	1.7024	0	0	2379600	2379600	0
REV__sp|O95171|SCEL_HUMAN	REV__sp|O95171|SCEL_HUMAN	1	1	1	>sp|O95171|SCEL_HUMAN Sciellin OS=Homo sapiens GN=SCEL PE=1 SV=2	1	1	1	1	1	0	1	0	1	0	0	0	0	77.551	688	688	12.3												2	1								0.0045761	1.9055	0	0	2235200	2235200	0
REV__sp|O95825|QORL1_HUMAN	REV__sp|O95825|QORL1_HUMAN	2	2	2	>sp|O95825|QORL1_HUMAN Quinone oxidoreductase-like protein 1 OS=Homo sapiens GN=CRYZL1 PE=1 SV=2	1	2	2	2	1	1	1	1	1	1	0	0	0	38.696	349	349	1	1																				0.005509	1.8241	0	0	1205500	497180	708280
REV__sp|P11047|LAMC1_HUMAN	REV__sp|P11047|LAMC1_HUMAN	1	1	1	>sp|P11047|LAMC1_HUMAN Laminin subunit gamma-1 OS=Homo sapiens GN=LAMC1 PE=1 SV=3	1	1	1	1	1	0	1	0	1	0	0	0	0	177.6	1609	1609	10										1											0.0018051	2.6545	0	0	36676	36676	0
REV__sp|P14867|GBRA1_HUMAN	REV__sp|P14867|GBRA1_HUMAN	1	1	1	>sp|P14867|GBRA1_HUMAN Gamma-aminobutyric acid receptor subunit alpha-1 OS=Homo sapiens GN=GABRA1 PE=1 SV=3	1	1	1	1	1	0	1	0	1	0	0	0	0	51.801	456	456	8								1													0.0050481	1.8757	0	0	42223	42223	0
REV__sp|P19022|CADH2_HUMAN	REV__sp|P19022|CADH2_HUMAN	1	1	1	>sp|P19022|CADH2_HUMAN Cadherin-2 OS=Homo sapiens GN=CDH2 PE=1 SV=4	1	1	1	1	1	0	1	0	1	0	0	0	0	99.808	906	906	4.5		1					1														0.0034551	2.159	0	0	2025600	2025600	0
REV__sp|P31153|METK2_HUMAN	REV__sp|P31153|METK2_HUMAN	1	1	1	>sp|P31153|METK2_HUMAN S-adenosylmethionine synthase isoform type-2 OS=Homo sapiens GN=MAT2A PE=1 SV=1	1	1	1	1	1	0	1	0	1	0	0	0	0	43.66	395	395	13													1								0.0094296	1.4213	0	0	1189800	1189800	0
REV__sp|P37173|TGFR2_HUMAN	REV__sp|P37173|TGFR2_HUMAN	1	1	1	>sp|P37173|TGFR2_HUMAN TGF-beta receptor type-2 OS=Homo sapiens GN=TGFBR2 PE=1 SV=2	1	1	1	1	1	0	1	0	1	0	0	0	0	64.567	567	567	7							1														0.0059382	1.7314	0	0	89213	89213	0
REV__sp|P41252|SYIC_HUMAN	REV__sp|P41252|SYIC_HUMAN	1	1	1	>sp|P41252|SYIC_HUMAN Isoleucine--tRNA ligase, cytoplasmic OS=Homo sapiens GN=IARS PE=1 SV=2	1	1	1	1	1	0	1	0	1	0	0	0	0	144.5	1262	1262	19																			1		0.0084014	1.5578	0	0	52708	52708	0
REV__sp|P48357|LEPR_HUMAN	REV__sp|P48357|LEPR_HUMAN	1	1	1	>sp|P48357|LEPR_HUMAN Leptin receptor OS=Homo sapiens GN=LEPR PE=1 SV=2	1	1	1	1	1	0	1	0	1	0	0	0	0	132.49	1165	1165	13													1								0.0075223	1.623	0	0	39030	39030	0
REV__sp|P57075|UBS3A_HUMAN	REV__sp|P57075|UBS3A_HUMAN	1	1	1	>sp|P57075|UBS3A_HUMAN Ubiquitin-associated and SH3 domain-containing protein A OS=Homo sapiens GN=UBASH3A PE=1 SV=1	1	1	1	1	1	0	1	0	1	0	0	0	0	74.122	661	661	15															1						0.000803	2.9891	0	0	2919100	2919100	0
REV__sp|Q00872|MYPC1_HUMAN	REV__sp|Q00872|MYPC1_HUMAN	1	1	1	>sp|Q00872|MYPC1_HUMAN Myosin-binding protein C, slow-type OS=Homo sapiens GN=MYBPC1 PE=1 SV=2	1	1	1	1	1	1	1	1	1	1	0	0	0	128.29	1141	1141	8								1													0.0027336	2.2473	0	0	1961700	1441600	520160
REV__sp|Q12802|AKP13_HUMAN	REV__sp|Q12802|AKP13_HUMAN	1	1	1	>sp|Q12802|AKP13_HUMAN A-kinase anchor protein 13 OS=Homo sapiens GN=AKAP13 PE=1 SV=2	1	1	1	1	1	0	1	0	1	0	0	0	0	307.55	2813	2813	8								1													0.0070822	1.6664	0	0	135230	135230	0
REV__sp|Q15833|STXB2_HUMAN	REV__sp|Q15833|STXB2_HUMAN	2	2	2	>sp|Q15833|STXB2_HUMAN Syntaxin-binding protein 2 OS=Homo sapiens GN=STXBP2 PE=1 SV=2	1	2	2	2	1	1	1	1	1	1	0	0	0	66.452	593	593	8								1													0.0057403	1.8141	0	0	4576200	4506300	69914
REV__sp|Q2M2H8|MGAL_HUMAN	REV__sp|Q2M2H8|MGAL_HUMAN	1	1	1	>sp|Q2M2H8|MGAL_HUMAN Probable maltase-glucoamylase 2 OS=Homo sapiens GN=MGAM2 PE=2 SV=3	1	1	1	1	1	0	1	0	1	0	0	0	0	277.99	2515	2515	8								1													0.0038901	2.0211	0	0	780990	780990	0
REV__sp|Q494X3|ZN404_HUMAN	REV__sp|Q494X3|ZN404_HUMAN	1	1	1	>sp|Q494X3|ZN404_HUMAN Zinc finger protein 404 OS=Homo sapiens GN=ZNF404 PE=1 SV=2	1	1	1	1	1	0	1	0	1	0	0	0	0	65.424	552	552	9									1												0.0098241	1.3604	0	0	128810	128810	0
REV__sp|Q5JSL3|DOC11_HUMAN	REV__sp|Q5JSL3|DOC11_HUMAN	1	1	1	>sp|Q5JSL3|DOC11_HUMAN Dedicator of cytokinesis protein 11 OS=Homo sapiens GN=DOCK11 PE=1 SV=2	1	1	1	1	1	0	1	0	1	0	0	0	0	237.67	2073	2073	5				1	2	1															0.00054098	3.0868	0	0	688350	688350	0
REV__sp|Q6UW60|PCSK4_HUMAN	REV__sp|Q6UW60|PCSK4_HUMAN	1	1	1	>sp|Q6UW60|PCSK4_HUMAN Proprotein convertase subtilisin/kexin type 4 OS=Homo sapiens GN=PCSK4 PE=2 SV=2	1	1	1	1	1	0	1	0	1	0	0	0	0	82.794	755	755	7							1														0.0096242	1.3925	0	0	218120	218120	0
REV__sp|Q6ZSS7|MFSD6_HUMAN	REV__sp|Q6ZSS7|MFSD6_HUMAN	1	1	1	>sp|Q6ZSS7|MFSD6_HUMAN Major facilitator superfamily domain-containing protein 6 OS=Homo sapiens GN=MFSD6 PE=1 SV=2	1	1	1	1	1	0	1	0	1	0	0	0	0	88.087	791	791	8								1													0.0090028	1.4645	0	0	275700	275700	0
REV__sp|Q7Z460|CLAP1_HUMAN	REV__sp|Q7Z460|CLAP1_HUMAN	1	1	1	>sp|Q7Z460|CLAP1_HUMAN CLIP-associating protein 1 OS=Homo sapiens GN=CLASP1 PE=1 SV=1	1	1	1	1	0	1	0	1	0	1	0	0	0	169.45	1538	1538	NaN																					0.0081699	1.5604	0	0	669350	0	669350
REV__sp|Q7Z745|MRO2B_HUMAN	REV__sp|Q7Z745|MRO2B_HUMAN	1	1	1	>sp|Q7Z745|MRO2B_HUMAN Maestro heat-like repeat-containing protein family member 2B OS=Homo sapiens GN=MROH2B PE=2 SV=3	1	1	1	1	1	1	1	1	1	1	0	0	0	180.78	1585	1585	5.67		1					1	1													0.00797	1.5886	0	0	4411600	3437800	973860
REV__sp|Q7Z7A1|CNTRL_HUMAN	REV__sp|Q7Z7A1|CNTRL_HUMAN	2	2	2	>sp|Q7Z7A1|CNTRL_HUMAN Centriolin OS=Homo sapiens GN=CNTRL PE=1 SV=2	1	2	2	2	2	0	2	0	2	0	0	0	0	268.88	2325	2325	9.5								1			1										0.0024956	2.2887	0	0	431630	431630	0
REV__sp|Q86VF7|NRAP_HUMAN	REV__sp|Q86VF7|NRAP_HUMAN	1	1	1	>sp|Q86VF7|NRAP_HUMAN Nebulin-related-anchoring protein OS=Homo sapiens GN=NRAP PE=2 SV=2	1	1	1	1	1	0	1	0	1	0	0	0	0	197.07	1730	1730	5		1			1			1													0.0010633	2.9342	0	0	1648600	1648600	0
REV__sp|Q86YF9|DZIP1_HUMAN	REV__sp|Q86YF9|DZIP1_HUMAN	1	1	1	>sp|Q86YF9|DZIP1_HUMAN Zinc finger protein DZIP1 OS=Homo sapiens GN=DZIP1 PE=1 SV=1	1	1	1	1	1	0	1	0	1	0	0	0	0	98.663	867	867	6.25	1						1	1	1												0.0048088	1.8785	0	0	20081000	20081000	0
REV__sp|Q86YM7|HOME1_HUMAN	REV__sp|Q86YM7|HOME1_HUMAN	1	1	1	>sp|Q86YM7|HOME1_HUMAN Homer protein homolog 1 OS=Homo sapiens GN=HOMER1 PE=1 SV=2	1	1	1	1	0	1	0	1	0	1	0	0	0	40.276	354	354	NaN																					0.0052885	1.8719	0	0	38380	0	38380
REV__sp|Q8N4C7|STX19_HUMAN	REV__sp|Q8N4C7|STX19_HUMAN	1	1	1	>sp|Q8N4C7|STX19_HUMAN Syntaxin-19 OS=Homo sapiens GN=STX19 PE=1 SV=1	1	1	1	1	1	0	1	0	1	0	0	0	0	34.324	294	294	14														1							0.0061699	1.7203	0	0	113080	113080	0
REV__sp|Q8N608|DPP10_HUMAN	REV__sp|Q8N608|DPP10_HUMAN	1	1	1	>sp|Q8N608|DPP10_HUMAN Inactive dipeptidyl peptidase 10 OS=Homo sapiens GN=DPP10 PE=1 SV=2	1	1	1	1	1	0	1	0	1	0	0	0	0	90.887	796	796	2		1																			0.0066272	1.7006	0	0	116110	116110	0
REV__sp|Q8NF64|ZMIZ2_HUMAN	REV__sp|Q8NF64|ZMIZ2_HUMAN	1	1	1	>sp|Q8NF64|ZMIZ2_HUMAN Zinc finger MIZ domain-containing protein 2 OS=Homo sapiens GN=ZMIZ2 PE=1 SV=2	1	1	1	1	1	0	1	0	1	0	0	0	0	96.536	920	920	19																			1		0.0015512	2.6805	0	0	64607	64607	0
REV__sp|Q8TDM6|DLG5_HUMAN	REV__sp|Q8TDM6|DLG5_HUMAN	2	2	2	>sp|Q8TDM6|DLG5_HUMAN Disks large homolog 5 OS=Homo sapiens GN=DLG5 PE=1 SV=4	1	2	2	2	2	0	2	0	2	0	0	0	0	213.87	1919	1919	10						1					1		1								0.0086007	1.5257	0	0	1339200	1339200	0
REV__sp|Q92541|RTF1_HUMAN	REV__sp|Q92541|RTF1_HUMAN	1	1	1	>sp|Q92541|RTF1_HUMAN RNA polymerase-associated protein RTF1 homolog OS=Homo sapiens GN=RTF1 PE=1 SV=4	1	1	1	1	0	1	0	1	0	1	0	0	0	80.313	710	710	NaN																					0.0020387	2.5293	0	0	162710	0	162710
REV__sp|Q96JM2|ZN462_HUMAN	REV__sp|Q96JM2|ZN462_HUMAN	2	2	2	>sp|Q96JM2|ZN462_HUMAN Zinc finger protein 462 OS=Homo sapiens GN=ZNF462 PE=1 SV=3	1	2	2	2	2	0	2	0	2	0	0	0	0	284.68	2506	2506	7.5							1	1													0.0043373	1.9095	0	0	2669100	2669100	0
REV__sp|Q96LD4|TRI47_HUMAN	REV__sp|Q96LD4|TRI47_HUMAN	1	1	1	>sp|Q96LD4|TRI47_HUMAN Tripartite motif-containing protein 47 OS=Homo sapiens GN=TRIM47 PE=1 SV=2	1	1	1	1	0	1	0	1	0	1	0	0	0	69.531	638	638	NaN																					0.00027093	3.1075	0	0	428590	0	428590
REV__sp|Q96T88|UHRF1_HUMAN	REV__sp|Q96T88|UHRF1_HUMAN	1	1	1	>sp|Q96T88|UHRF1_HUMAN E3 ubiquitin-protein ligase UHRF1 OS=Homo sapiens GN=UHRF1 PE=1 SV=1	1	1	1	1	1	0	1	0	1	0	0	0	0	89.813	793	793	15															2						0.0029747	2.2222	0	0	292880	292880	0
REV__sp|Q9HAU0|PKHA5_HUMAN	REV__sp|Q9HAU0|PKHA5_HUMAN	1	1	1	>sp|Q9HAU0|PKHA5_HUMAN Pleckstrin homology domain-containing family A member 5 OS=Homo sapiens GN=PLEKHA5 PE=1 SV=1	1	1	1	1	1	0	1	0	1	0	0	0	0	127.46	1116	1116	14														1							0.0032083	2.1606	0	0	69838	69838	0
REV__sp|Q9P1Z2|CACO1_HUMAN	REV__sp|Q9P1Z2|CACO1_HUMAN	1	1	1	>sp|Q9P1Z2|CACO1_HUMAN Calcium-binding and coiled-coil domain-containing protein 1 OS=Homo sapiens GN=CALCOCO1 PE=1 SV=2	1	1	1	1	1	0	1	0	1	0	0	0	0	77.335	691	691	12												1									0.008831	1.5191	0	0	423220	423220	0
REV__sp|Q9Y2R2|PTN22_HUMAN	REV__sp|Q9Y2R2|PTN22_HUMAN	1	1	1	>sp|Q9Y2R2|PTN22_HUMAN Tyrosine-protein phosphatase non-receptor type 22 OS=Homo sapiens GN=PTPN22 PE=1 SV=2	1	1	1	1	1	0	1	0	1	0	0	0	0	91.704	807	807	18																		1			0.0068623	1.6891	0	0	59820	59820	0
sp|A0AV96|RBM47_HUMAN	sp|A0AV96|RBM47_HUMAN	4	4	4	>sp|A0AV96|RBM47_HUMAN RNA-binding protein 47 OS=Homo sapiens GN=RBM47 PE=1 SV=2	1	4	4	4	4	2	4	2	4	2	12.6	12.6	12.6	64.098	593	593	10.4					1	2			1			1					1	1			0	25.873	12.6	6.1	760010	653440	106570
sp|A0AVT1|UBA6_HUMAN	sp|A0AVT1|UBA6_HUMAN	6	6	6	>sp|A0AVT1|UBA6_HUMAN Ubiquitin-like modifier-activating enzyme 6 OS=Homo sapiens GN=UBA6 PE=1 SV=1	1	6	6	6	6	0	6	0	6	0	7.4	7.4	7.4	117.97	1052	1052	12							1	1				1	2		1	1					0	20.255	7.4	0	670570	670570	0
sp|A0FGR8|ESYT2_HUMAN	sp|A0FGR8|ESYT2_HUMAN	6	6	6	>sp|A0FGR8|ESYT2_HUMAN Extended synaptotagmin-2 OS=Homo sapiens GN=ESYT2 PE=1 SV=1	1	6	6	6	6	0	6	0	6	0	12.2	12.2	12.2	102.36	921	921	10.6								1	2		1	2	1								0	8.4177	12.2	0	434630	434630	0
sp|A0MZ66|SHOT1_HUMAN	sp|A0MZ66|SHOT1_HUMAN	4	4	4	>sp|A0MZ66|SHOT1_HUMAN Shootin-1 OS=Homo sapiens GN=SHTN1 PE=1 SV=4	1	4	4	4	4	0	4	0	4	0	9.5	9.5	9.5	71.639	631	631	11.7							1	1	1	1							1		1		0	8.3587	9.5	0	297800	297800	0
sp|A1L0T0|ILVBL_HUMAN	sp|A1L0T0|ILVBL_HUMAN	6	6	6	>sp|A1L0T0|ILVBL_HUMAN Acetolactate synthase-like protein OS=Homo sapiens GN=ILVBL PE=1 SV=2	1	6	6	6	6	0	6	0	6	0	19.5	19.5	19.5	67.867	632	632	16.1												1	1	1		1	1	1	1	1	0	28.216	19.5	0	574920	574920	0
sp|A2RRP1|NBAS_HUMAN	sp|A2RRP1|NBAS_HUMAN	8	8	8	>sp|A2RRP1|NBAS_HUMAN Neuroblastoma-amplified sequence OS=Homo sapiens GN=NBAS PE=1 SV=2	1	8	8	8	8	0	8	0	8	0	4.8	4.8	4.8	268.57	2371	2371	12.4							1		1		1	1	1	2	1		1				0	18.834	4.8	0	512700	512700	0
sp|A3KMH1|VWA8_HUMAN	sp|A3KMH1|VWA8_HUMAN	5	5	5	>sp|A3KMH1|VWA8_HUMAN von Willebrand factor A domain-containing protein 8 OS=Homo sapiens GN=VWA8 PE=1 SV=2	1	5	5	5	5	0	5	0	5	0	3.7	3.7	3.7	214.82	1905	1905	13.4											1	2	1						1		0	11.382	3.7	0	339070	339070	0
sp|A3KN83|SBNO1_HUMAN;sp|Q9Y2G9|SBNO2_HUMAN	sp|A3KN83|SBNO1_HUMAN	5;2	5;2	5;2	>sp|A3KN83|SBNO1_HUMAN Protein strawberry notch homolog 1 OS=Homo sapiens GN=SBNO1 PE=1 SV=1	2	5	5	5	5	0	5	0	5	0	5	5	5	154.31	1393	1393;1366	14													3	1			1				0	5.8144	5	0	280640	280640	0
sp|A4D1E9|GTPBA_HUMAN	sp|A4D1E9|GTPBA_HUMAN	5	5	5	>sp|A4D1E9|GTPBA_HUMAN GTP-binding protein 10 OS=Homo sapiens GN=GTPBP10 PE=1 SV=1	1	5	5	5	4	1	4	1	4	1	17.6	17.6	17.6	42.932	387	387	14.8									1			1		1			1	1	1		0	5.9476	14.7	2.8	626810	501680	125130
sp|A5D8V6|VP37C_HUMAN	sp|A5D8V6|VP37C_HUMAN	1	1	1	>sp|A5D8V6|VP37C_HUMAN Vacuolar protein sorting-associated protein 37C OS=Homo sapiens GN=VPS37C PE=1 SV=2	1	1	1	1	1	0	1	0	1	0	5.6	5.6	5.6	38.658	355	355	9									1												0.0040993	1.9163	5.6	0	32373	32373	0
sp|A5PLN9|TPC13_HUMAN	sp|A5PLN9|TPC13_HUMAN	2	2	2	>sp|A5PLN9|TPC13_HUMAN Trafficking protein particle complex subunit 13 OS=Homo sapiens GN=TRAPPC13 PE=1 SV=2	1	2	2	2	2	0	2	0	2	0	9.6	9.6	9.6	46.523	417	417	11.7								1	1									1			0	7.8332	9.6	0	183000	183000	0
sp|A5YKK6|CNOT1_HUMAN	sp|A5YKK6|CNOT1_HUMAN	20	20	20	>sp|A5YKK6|CNOT1_HUMAN CCR4-NOT transcription complex subunit 1 OS=Homo sapiens GN=CNOT1 PE=1 SV=2	1	20	20	20	18	2	18	2	18	2	12.8	12.8	12.8	266.94	2376	2376	11					2		2	1	3	1	3	5	3	1		1	2				0	47.852	11.8	1	2359400	2254400	104910
sp|A6NDG6|PGP_HUMAN	sp|A6NDG6|PGP_HUMAN	3	3	3	>sp|A6NDG6|PGP_HUMAN Phosphoglycolate phosphatase OS=Homo sapiens GN=PGP PE=1 SV=1	1	3	3	3	3	0	3	0	3	0	15	15	15	34.006	321	321	10.8								1			1	2									0	7.7827	15	0	283110	283110	0
sp|P30046|DOPD_HUMAN;sp|A6NHG4|DDTL_HUMAN	sp|P30046|DOPD_HUMAN;sp|A6NHG4|DDTL_HUMAN	1;1	1;1	1;1	>sp|P30046|DOPD_HUMAN D-dopachrome decarboxylase OS=Homo sapiens GN=DDT PE=1 SV=3;>sp|A6NHG4|DDTL_HUMAN D-dopachrome decarboxylase-like protein OS=Homo sapiens GN=DDTL PE=2 SV=1	2	1	1	1	0	1	0	1	0	1	11	11	11	12.712	118	118;134	NaN																					0.0024913	2.267	0	11	126170	0	126170
sp|A6NHL2|TBAL3_HUMAN	sp|A6NHL2|TBAL3_HUMAN	2	1	1	>sp|A6NHL2|TBAL3_HUMAN Tubulin alpha chain-like 3 OS=Homo sapiens GN=TUBAL3 PE=1 SV=2	1	2	1	1	2	1	1	0	1	0	5.8	3.8	3.8	49.908	446	446	12												1									1	-2	5.8	2	41723	41723	0
sp|A6NHR9|SMHD1_HUMAN	sp|A6NHR9|SMHD1_HUMAN	8	8	8	>sp|A6NHR9|SMHD1_HUMAN Structural maintenance of chromosomes flexible hinge domain-containing protein 1 OS=Homo sapiens GN=SMCHD1 PE=1 SV=2	1	8	8	8	8	0	8	0	8	0	5.4	5.4	5.4	226.37	2005	2005	12.6						1	1	1	1	1	1			1				2	2		0	13.802	5.4	0	730420	730420	0
sp|A6NJ78|MET15_HUMAN;sp|P0C7V9|ME15P_HUMAN	sp|A6NJ78|MET15_HUMAN	4;1	4;1	4;1	>sp|A6NJ78|MET15_HUMAN Probable methyltransferase-like protein 15 OS=Homo sapiens GN=METTL15 PE=1 SV=1	2	4	4	4	2	2	2	2	2	2	15.7	15.7	15.7	46.121	407	407;234	15												1				1	1				0	5.3477	8.6	7.1	142430	89855	52577
sp|A6NKT7|RGPD3_HUMAN;sp|Q7Z3J3|RGPD4_HUMAN	sp|A6NKT7|RGPD3_HUMAN;sp|Q7Z3J3|RGPD4_HUMAN	8;7	1;1	1;1	>sp|A6NKT7|RGPD3_HUMAN RanBP2-like and GRIP domain-containing protein 3 OS=Homo sapiens GN=RGPD3 PE=3 SV=2;>sp|Q7Z3J3|RGPD4_HUMAN RanBP2-like and GRIP domain-containing protein 4 OS=Homo sapiens GN=RGPD4 PE=2 SV=3	2	8	1	1	8	1	1	0	1	0	5.6	0.7	0.7	197.48	1758	1758;1758	4.75	1				1	1	1														0	3.1295	5.6	0.7	798380	798380	0
sp|Q0D2H9|GOG8D_HUMAN;sp|Q08AF8|GOG8F_HUMAN;sp|A6NN73|GOG8C_HUMAN	sp|Q0D2H9|GOG8D_HUMAN;sp|Q08AF8|GOG8F_HUMAN;sp|A6NN73|GOG8C_HUMAN	1;1;1	1;1;1	1;1;1	>sp|Q0D2H9|GOG8D_HUMAN Putative golgin subfamily A member 8D OS=Homo sapiens GN=GOLGA8DP PE=5 SV=1;>sp|Q08AF8|GOG8F_HUMAN Putative golgin subfamily A member 8F/8G OS=Homo sapiens GN=GOLGA8F PE=5 SV=1;>sp|A6NN73|GOG8C_HUMAN Golgin subfamily A member 8C OS=H	3	1	1	1	0	1	0	1	0	1	2.3	2.3	2.3	48.422	430	430;430;597	NaN																					0.0092081	1.4339	0	2.3	114310	0	114310
sp|P62308|RUXG_HUMAN;sp|A8MWD9|RUXGL_HUMAN	sp|P62308|RUXG_HUMAN;sp|A8MWD9|RUXGL_HUMAN	2;2	2;2	2;2	>sp|P62308|RUXG_HUMAN Small nuclear ribonucleoprotein G OS=Homo sapiens GN=SNRPG PE=1 SV=1;>sp|A8MWD9|RUXGL_HUMAN Putative small nuclear ribonucleoprotein G-like protein 15 OS=Homo sapiens GN=SNRPGP15 PE=5 SV=2	2	2	2	2	1	2	1	2	1	2	17.1	17.1	17.1	8.496	76	76;76	8.5								1	1												0	8.3622	17.1	17.1	604410	141500	462910
sp|A8MXV4|NUD19_HUMAN	sp|A8MXV4|NUD19_HUMAN	2	2	2	>sp|A8MXV4|NUD19_HUMAN Nucleoside diphosphate-linked moiety X motif 19, mitochondrial OS=Homo sapiens GN=NUDT19 PE=1 SV=1	1	2	2	2	2	0	2	0	2	0	5.9	5.9	5.9	42.233	375	375	16.5															1	1	1	1			0	6.0192	5.9	0	635050	635050	0
sp|Q99613|EIF3C_HUMAN;sp|B5ME19|EIFCL_HUMAN	sp|Q99613|EIF3C_HUMAN;sp|B5ME19|EIFCL_HUMAN	10;10	10;10	10;10	>sp|Q99613|EIF3C_HUMAN Eukaryotic translation initiation factor 3 subunit C OS=Homo sapiens GN=EIF3C PE=1 SV=1;>sp|B5ME19|EIFCL_HUMAN Eukaryotic translation initiation factor 3 subunit C-like protein OS=Homo sapiens GN=EIF3CL PE=3 SV=1	2	10	10	10	8	7	8	7	8	7	12	12	12	105.34	913	913;914	8.19	3	2				2	3	4	3	1	2	3	2	2							0	107.98	9.4	9.5	8515200	6507400	2007800
sp|P0CG06|LAC3_HUMAN;sp|P0CG05|LAC2_HUMAN;sp|P0CG04|LAC1_HUMAN;sp|B9A064|IGLL5_HUMAN;sp|P0CF74|LAC6_HUMAN;sp|A0M8Q6|LAC7_HUMAN	sp|P0CG06|LAC3_HUMAN;sp|P0CG05|LAC2_HUMAN;sp|P0CG04|LAC1_HUMAN;sp|B9A064|IGLL5_HUMAN;sp|P0CF74|LAC6_HUMAN;sp|A0M8Q6|LAC7_HUMAN	2;2;2;2;1;1	2;2;2;2;1;1	2;2;2;2;1;1	>sp|P0CG06|LAC3_HUMAN Ig lambda-3 chain C regions OS=Homo sapiens GN=IGLC3 PE=1 SV=1;>sp|P0CG05|LAC2_HUMAN Ig lambda-2 chain C regions OS=Homo sapiens GN=IGLC2 PE=1 SV=1;>sp|P0CG04|LAC1_HUMAN Ig lambda-1 chain C regions OS=Homo sapiens GN=IGLC1 PE=1 SV=1;>	6	2	2	2	2	1	2	1	2	1	33	33	33	11.237	106	106;106;106;214;106;106	11.3	1	1	1	3	2	2	1	2	3	2	1	2	1	2	3	2	2	2	2	3	0	37.595	33	18.9	7608000	7056900	551140
sp|C4AMC7|WASH3_HUMAN;sp|Q6VEQ5|WASH2_HUMAN;sp|Q9NQA3|WASH6_HUMAN;sp|A8K0Z3|WASH1_HUMAN;sp|A8MWX3|WASH4_HUMAN	sp|C4AMC7|WASH3_HUMAN;sp|Q6VEQ5|WASH2_HUMAN;sp|Q9NQA3|WASH6_HUMAN;sp|A8K0Z3|WASH1_HUMAN;sp|A8MWX3|WASH4_HUMAN	4;4;3;3;2	4;4;3;3;2	4;4;3;3;2	>sp|C4AMC7|WASH3_HUMAN Putative WAS protein family homolog 3 OS=Homo sapiens GN=WASH3P PE=1 SV=2;>sp|Q6VEQ5|WASH2_HUMAN WAS protein family homolog 2 OS=Homo sapiens GN=WASH2P PE=2 SV=2;>sp|Q9NQA3|WASH6_HUMAN WAS protein family homolog 6 OS=Homo sapiens GN=	5	4	4	4	4	0	4	0	4	0	13.2	13.2	13.2	49.994	463	463;465;447;465;477	11.8								1			1	1	2	1							0	26.521	13.2	0	977930	977930	0
sp|C9JLW8|F195B_HUMAN	sp|C9JLW8|F195B_HUMAN	4	4	4	>sp|C9JLW8|F195B_HUMAN Protein FAM195B OS=Homo sapiens GN=FAM195B PE=1 SV=1	1	4	4	4	4	0	4	0	4	0	57.7	57.7	57.7	10.92	97	97	10.4									1	2	1	1									0	5.1666	57.7	0	565290	565290	0
sp|E9PAV3|NACAM_HUMAN;sp|Q13765|NACA_HUMAN	sp|E9PAV3|NACAM_HUMAN;sp|Q13765|NACA_HUMAN	6;5	6;5	6;5	>sp|E9PAV3|NACAM_HUMAN Nascent polypeptide-associated complex subunit alpha, muscle-specific form OS=Homo sapiens GN=NACA PE=1 SV=1;>sp|Q13765|NACA_HUMAN Nascent polypeptide-associated complex subunit alpha OS=Homo sapiens GN=NACA PE=1 SV=1	2	6	6	6	6	4	6	4	6	4	5.1	5.1	5.1	205.42	2078	2078;215	5.83	2	4	3	3	4	7	8	7	1			1	1								0	195.83	5.1	2.7	16871000	14700000	2171000
sp|O00115|DNS2A_HUMAN	sp|O00115|DNS2A_HUMAN	2	2	2	>sp|O00115|DNS2A_HUMAN Deoxyribonuclease-2-alpha OS=Homo sapiens GN=DNASE2 PE=1 SV=2	1	2	2	2	1	1	1	1	1	1	7.2	7.2	7.2	39.58	360	360	17.5																	2	2			0	10.303	3.9	3.3	672540	426770	245770
sp|O00116|ADAS_HUMAN	sp|O00116|ADAS_HUMAN	12	12	12	>sp|O00116|ADAS_HUMAN Alkyldihydroxyacetonephosphate synthase, peroxisomal OS=Homo sapiens GN=AGPS PE=1 SV=1	1	12	12	12	11	7	11	7	11	7	28.4	28.4	28.4	72.911	658	658	9.12	2	3		1	2	4	4	5	3	1	5	3	3	2			1	1	1	1	0	180.46	28.3	17.9	10479000	9111800	1367200
sp|O00139|KIF2A_HUMAN	sp|O00139|KIF2A_HUMAN	3	3	3	>sp|O00139|KIF2A_HUMAN Kinesin-like protein KIF2A OS=Homo sapiens GN=KIF2A PE=1 SV=3	1	3	3	3	3	0	3	0	3	0	4.7	4.7	4.7	79.954	706	706	9.67								1		1	1										0	5.712	4.7	0	302280	302280	0
sp|O00148|DX39A_HUMAN	sp|O00148|DX39A_HUMAN	8	2	1	>sp|O00148|DX39A_HUMAN ATP-dependent RNA helicase DDX39A OS=Homo sapiens GN=DDX39A PE=1 SV=2	1	8	2	1	5	5	1	1	1	1	22.7	7.3	7	49.129	427	427	12.5												1	1								0	15.317	17.8	17.3	742620	579200	163420
sp|O00151|PDLI1_HUMAN	sp|O00151|PDLI1_HUMAN	13	13	13	>sp|O00151|PDLI1_HUMAN PDZ and LIM domain protein 1 OS=Homo sapiens GN=PDLIM1 PE=1 SV=4	1	13	13	13	11	6	11	6	11	6	66	66	66	36.071	329	329	10.2		2	1		2	2	2	4	5	3	2	1	1	2		3	1	1	1	1	0	150.37	56.5	35	13746000	11223000	2523400
sp|O00154|BACH_HUMAN	sp|O00154|BACH_HUMAN	7	7	7	>sp|O00154|BACH_HUMAN Cytosolic acyl coenzyme A thioester hydrolase OS=Homo sapiens GN=ACOT7 PE=1 SV=3	1	7	7	7	7	1	7	1	7	1	26.1	26.1	26.1	41.796	380	380	11.9		1			1				1	2	2	1		1	3			1	1		0	24.841	26.1	3.2	3257900	3072900	185030
sp|O00159|MYO1C_HUMAN	sp|O00159|MYO1C_HUMAN	13	13	13	>sp|O00159|MYO1C_HUMAN Unconventional myosin-Ic OS=Homo sapiens GN=MYO1C PE=1 SV=4	1	13	13	13	11	3	11	3	11	3	15.6	15.6	15.6	121.68	1063	1063	12.5	1			1	1	1	1	1	1	1		2	3	2		3	3	3	1		0	71.057	14.1	2.4	2466200	2397300	68933
sp|O00160|MYO1F_HUMAN;sp|Q12965|MYO1E_HUMAN	sp|O00160|MYO1F_HUMAN;sp|Q12965|MYO1E_HUMAN	1;1	1;1	1;1	>sp|O00160|MYO1F_HUMAN Unconventional myosin-If OS=Homo sapiens GN=MYO1F PE=1 SV=3;>sp|Q12965|MYO1E_HUMAN Unconventional myosin-Ie OS=Homo sapiens GN=MYO1E PE=1 SV=2	2	1	1	1	1	0	1	0	1	0	1.5	1.5	1.5	124.84	1098	1098;1108	8								1													0.0013196	2.8703	1.5	0	65244	65244	0
sp|O00161|SNP23_HUMAN	sp|O00161|SNP23_HUMAN	7	7	7	>sp|O00161|SNP23_HUMAN Synaptosomal-associated protein 23 OS=Homo sapiens GN=SNAP23 PE=1 SV=1	1	7	7	7	5	3	5	3	5	3	54	54	54	23.354	211	211	10.9						1	3	2	2							1	1	1	1		0	74.642	41.2	21.3	3160200	2580600	579620
sp|O00165|HAX1_HUMAN	sp|O00165|HAX1_HUMAN	2	2	2	>sp|O00165|HAX1_HUMAN HCLS1-associated protein X-1 OS=Homo sapiens GN=HAX1 PE=1 SV=2	1	2	2	2	2	0	2	0	2	0	6.5	6.5	6.5	31.62	279	279	8							1		1												0	4.8185	6.5	0	158690	158690	0
sp|O00170|AIP_HUMAN	sp|O00170|AIP_HUMAN	5	5	5	>sp|O00170|AIP_HUMAN AH receptor-interacting protein OS=Homo sapiens GN=AIP PE=1 SV=2	1	5	5	5	3	2	3	2	3	2	20.3	20.3	20.3	37.636	330	330	7.83	1				1			1	1			2									0	19.221	12.1	8.2	809950	726240	83714
sp|O00182|LEG9_HUMAN	sp|O00182|LEG9_HUMAN	1	1	1	>sp|O00182|LEG9_HUMAN Galectin-9 OS=Homo sapiens GN=LGALS9 PE=1 SV=2	1	1	1	1	1	0	1	0	1	0	3.9	3.9	3.9	39.518	355	355	17																	1				0	4.8207	3.9	0	22279	22279	0
sp|O00193|SMAP_HUMAN	sp|O00193|SMAP_HUMAN	2	2	2	>sp|O00193|SMAP_HUMAN Small acidic protein OS=Homo sapiens GN=SMAP PE=1 SV=1	1	2	2	2	2	1	2	1	2	1	21.3	21.3	21.3	20.332	183	183	6.6						2	3														0	15.139	21.3	8.7	922900	825690	97212
sp|O00203|AP3B1_HUMAN;sp|Q13367|AP3B2_HUMAN	sp|O00203|AP3B1_HUMAN	12;1	12;1	12;1	>sp|O00203|AP3B1_HUMAN AP-3 complex subunit beta-1 OS=Homo sapiens GN=AP3B1 PE=1 SV=3	2	12	12	12	11	2	11	2	11	2	17.8	17.8	17.8	121.32	1094	1094;1082	13.7	1					1	1	1	2	1	1			1	4	2	2	1	3	2	0	45.651	16.6	3.4	2399000	2231600	167440
sp|O00214|LEG8_HUMAN	sp|O00214|LEG8_HUMAN	2	2	2	>sp|O00214|LEG8_HUMAN Galectin-8 OS=Homo sapiens GN=LGALS8 PE=1 SV=4	1	2	2	2	2	0	2	0	2	0	7.3	7.3	7.3	35.808	317	317	12.5											1			1							0.00053562	2.9929	7.3	0	60545	60545	0
sp|O00217|NDUS8_HUMAN	sp|O00217|NDUS8_HUMAN	3	3	3	>sp|O00217|NDUS8_HUMAN NADH dehydrogenase [ubiquinone] iron-sulfur protein 8, mitochondrial OS=Homo sapiens GN=NDUFS8 PE=1 SV=1	1	3	3	3	2	3	2	3	2	3	19.5	19.5	19.5	23.705	210	210	7			1			1	3	1	2												0	26.892	13.8	19.5	2627300	2454800	172460
sp|O00221|IKBE_HUMAN	sp|O00221|IKBE_HUMAN	2	2	2	>sp|O00221|IKBE_HUMAN NF-kappa-B inhibitor epsilon OS=Homo sapiens GN=NFKBIE PE=1 SV=3	1	2	2	2	2	0	2	0	2	0	7	7	7	52.863	500	500	10.7						1	1												1		0	3.5849	7	0	169870	169870	0
sp|O00231|PSD11_HUMAN	sp|O00231|PSD11_HUMAN	15	15	15	>sp|O00231|PSD11_HUMAN 26S proteasome non-ATPase regulatory subunit 11 OS=Homo sapiens GN=PSMD11 PE=1 SV=3	1	15	15	15	11	10	11	10	11	10	41.7	41.7	41.7	47.463	422	422	7.94	5	3	2	2	3	4	3	6	7	2	4	5	1	3	2	1					0	220.76	33.4	27.3	23267000	18957000	4310100
sp|O00232|PSD12_HUMAN	sp|O00232|PSD12_HUMAN	13	13	13	>sp|O00232|PSD12_HUMAN 26S proteasome non-ATPase regulatory subunit 12 OS=Homo sapiens GN=PSMD12 PE=1 SV=3	1	13	13	13	13	8	13	8	13	8	37.9	37.9	37.9	52.904	456	456	7.39	2	1		2	4	5	8	9	10			1				1	1				0	314.65	37.9	25.7	16805000	13745000	3059700
sp|O00233|PSMD9_HUMAN	sp|O00233|PSMD9_HUMAN	2	2	2	>sp|O00233|PSMD9_HUMAN 26S proteasome non-ATPase regulatory subunit 9 OS=Homo sapiens GN=PSMD9 PE=1 SV=3	1	2	2	2	2	1	2	1	2	1	12.6	12.6	12.6	24.682	223	223	14.8							1	1									1	1	1	1	0	22.896	12.6	5.4	692940	583530	109400
sp|O00244|ATOX1_HUMAN	sp|O00244|ATOX1_HUMAN	1	1	1	>sp|O00244|ATOX1_HUMAN Copper transport protein ATOX1 OS=Homo sapiens GN=ATOX1 PE=1 SV=1	1	1	1	1	1	0	1	0	1	0	26.5	26.5	26.5	7.4016	68	68	9									1												0	9.7557	26.5	0	155040	155040	0
sp|O00255|MEN1_HUMAN	sp|O00255|MEN1_HUMAN	2	2	2	>sp|O00255|MEN1_HUMAN Menin OS=Homo sapiens GN=MEN1 PE=1 SV=4	1	2	2	2	2	0	2	0	2	0	3.9	3.9	3.9	68.023	615	615	13													2								0.0094231	1.414	3.9	0	87177	87177	0
sp|O00264|PGRC1_HUMAN	sp|O00264|PGRC1_HUMAN	4	4	4	>sp|O00264|PGRC1_HUMAN Membrane-associated progesterone receptor component 1 OS=Homo sapiens GN=PGRMC1 PE=1 SV=3	1	4	4	4	4	2	4	2	4	2	30.8	30.8	30.8	21.671	195	195	7.77		1			1	2	4	2			1		1	1							0	54.699	30.8	17.4	2930300	1957300	973050
sp|O00267|SPT5H_HUMAN	sp|O00267|SPT5H_HUMAN	13	13	13	>sp|O00267|SPT5H_HUMAN Transcription elongation factor SPT5 OS=Homo sapiens GN=SUPT5H PE=1 SV=1	1	13	13	13	11	2	11	2	11	2	18.4	18.4	18.4	121	1087	1087	10.7		1			1	1	3	2	1		3	4	3	1			1	1	1		0	102.26	15.5	2.9	4664900	4475900	189070
sp|O00268|TAF4_HUMAN	sp|O00268|TAF4_HUMAN	5	5	5	>sp|O00268|TAF4_HUMAN Transcription initiation factor TFIID subunit 4 OS=Homo sapiens GN=TAF4 PE=1 SV=2	1	5	5	5	5	0	5	0	5	0	9.7	9.7	9.7	110.11	1085	1085	12.3							1	1				1	1				2				0	28.719	9.7	0	308800	308800	0
sp|O00273|DFFA_HUMAN	sp|O00273|DFFA_HUMAN	6	6	6	>sp|O00273|DFFA_HUMAN DNA fragmentation factor subunit alpha OS=Homo sapiens GN=DFFA PE=1 SV=1	1	6	6	6	5	2	5	2	5	2	26.3	26.3	26.3	36.521	331	331	7.17	1	2		2	1		1	1	1					1	2						0	37.942	23.6	6.3	1448600	893480	555160
sp|O00287|RFXAP_HUMAN	sp|O00287|RFXAP_HUMAN	1	1	1	>sp|O00287|RFXAP_HUMAN Regulatory factor X-associated protein OS=Homo sapiens GN=RFXAP PE=1 SV=1	1	1	1	1	1	0	1	0	1	0	4.8	4.8	4.8	28.232	272	272	12												2									0.0041112	1.9539	4.8	0	44518	44518	0
sp|O00291|HIP1_HUMAN	sp|O00291|HIP1_HUMAN	3	3	3	>sp|O00291|HIP1_HUMAN Huntingtin-interacting protein 1 OS=Homo sapiens GN=HIP1 PE=1 SV=5	1	3	3	3	3	0	3	0	3	0	3.9	3.9	3.9	116.22	1037	1037	15.2									1			1					1	1		1	0	4.4606	3.9	0	223900	223900	0
sp|O00299|CLIC1_HUMAN	sp|O00299|CLIC1_HUMAN	10	10	10	>sp|O00299|CLIC1_HUMAN Chloride intracellular channel protein 1 OS=Homo sapiens GN=CLIC1 PE=1 SV=4	1	10	10	10	9	7	9	7	9	7	61.8	61.8	61.8	26.922	241	241	6.03	6	5	5	3	7	9	9	5	4		3	3		2							0	309.37	58.1	47.3	36772000	31063000	5708900
sp|O00303|EIF3F_HUMAN	sp|O00303|EIF3F_HUMAN	7	7	7	>sp|O00303|EIF3F_HUMAN Eukaryotic translation initiation factor 3 subunit F OS=Homo sapiens GN=EIF3F PE=1 SV=1	1	7	7	7	7	3	7	3	7	3	24.9	24.9	24.9	37.563	357	357	11.8	3	3		2		1			1	2	6	5	4	1		2	3	5	3	1	0	89.184	24.9	12	15380000	14102000	1278300
sp|O00330|ODPX_HUMAN	sp|O00330|ODPX_HUMAN	4	4	4	>sp|O00330|ODPX_HUMAN Pyruvate dehydrogenase protein X component, mitochondrial OS=Homo sapiens GN=PDHX PE=1 SV=3	1	4	4	4	3	3	3	3	3	3	10.6	10.6	10.6	54.122	501	501	14.3											2	1	1	1					1	1	0	19.987	7.2	8.8	2228100	1865400	362740
sp|O00399|DCTN6_HUMAN	sp|O00399|DCTN6_HUMAN	1	1	1	>sp|O00399|DCTN6_HUMAN Dynactin subunit 6 OS=Homo sapiens GN=DCTN6 PE=1 SV=1	1	1	1	1	1	0	1	0	1	0	7.4	7.4	7.4	20.747	190	190	9.5									1	1											0	3.5074	7.4	0	210360	210360	0
sp|O00401|WASL_HUMAN	sp|O00401|WASL_HUMAN	2	2	2	>sp|O00401|WASL_HUMAN Neural Wiskott-Aldrich syndrome protein OS=Homo sapiens GN=WASL PE=1 SV=2	1	2	2	2	2	1	2	1	2	1	6.1	6.1	6.1	54.826	505	505	8.5							1			1											0	23.713	6.1	4.6	416280	329510	86771
sp|O00410|IPO5_HUMAN	sp|O00410|IPO5_HUMAN	26	26	24	>sp|O00410|IPO5_HUMAN Importin-5 OS=Homo sapiens GN=IPO5 PE=1 SV=4	1	26	26	24	22	14	22	14	20	14	37.3	37.3	35.6	123.63	1097	1097	10.2	2	3		1	3	4	5	10	5	3	7	9	8	2	3	1	2	3	2		0	323.31	32.2	20.8	23007000	18883000	4124300
sp|O00411|RPOM_HUMAN	sp|O00411|RPOM_HUMAN	3	3	3	>sp|O00411|RPOM_HUMAN DNA-directed RNA polymerase, mitochondrial OS=Homo sapiens GN=POLRMT PE=1 SV=2	1	3	3	3	3	0	3	0	3	0	4.7	4.7	4.7	138.62	1230	1230	14							1					1						1	1		0	4.8391	4.7	0	145860	145860	0
sp|O00423|EMAL1_HUMAN	sp|O00423|EMAL1_HUMAN	1	1	1	>sp|O00423|EMAL1_HUMAN Echinoderm microtubule-associated protein-like 1 OS=Homo sapiens GN=EML1 PE=1 SV=3	1	1	1	1	1	1	1	1	1	1	2.1	2.1	2.1	89.86	815	815	7							1														0.0052707	1.8274	2.1	2.1	231590	110940	120650
sp|O00425|IF2B3_HUMAN	sp|O00425|IF2B3_HUMAN	9	8	8	>sp|O00425|IF2B3_HUMAN Insulin-like growth factor 2 mRNA-binding protein 3 OS=Homo sapiens GN=IGF2BP3 PE=1 SV=2	1	9	8	8	8	2	7	2	7	2	21.2	19	19	63.704	579	579	12.5	2	1					1	2	5				1				2	4	3	2	0	88.587	19	5	4881200	4537500	343750
sp|O00429|DNM1L_HUMAN	sp|O00429|DNM1L_HUMAN	18	18	18	>sp|O00429|DNM1L_HUMAN Dynamin-1-like protein OS=Homo sapiens GN=DNM1L PE=1 SV=2	1	18	18	18	16	8	16	8	16	8	40.9	40.9	40.9	81.876	736	736	10	1				1	4	8	8	4		3	2	2	2	3	1	1	1	1	1	0	309.97	37.2	17.1	7598700	6657700	940990
sp|O00442|RTCA_HUMAN	sp|O00442|RTCA_HUMAN	2	2	2	>sp|O00442|RTCA_HUMAN RNA 3-terminal phosphate cyclase OS=Homo sapiens GN=RTCA PE=1 SV=1	1	2	2	2	2	0	2	0	2	0	5.5	5.5	5.5	39.336	366	366	17												1							1	1	0.003655	2.0417	5.5	0	124190	124190	0
sp|O00443|P3C2A_HUMAN	sp|O00443|P3C2A_HUMAN	3	3	3	>sp|O00443|P3C2A_HUMAN Phosphatidylinositol 4-phosphate 3-kinase C2 domain-containing subunit alpha OS=Homo sapiens GN=PIK3C2A PE=1 SV=2	1	3	3	3	3	0	3	0	3	0	2.1	2.1	2.1	190.68	1686	1686	15.7													1				2				0	4.3395	2.1	0	107420	107420	0
sp|O00461|GOLI4_HUMAN	sp|O00461|GOLI4_HUMAN	5	5	5	>sp|O00461|GOLI4_HUMAN Golgi integral membrane protein 4 OS=Homo sapiens GN=GOLIM4 PE=1 SV=1	1	5	5	5	3	2	3	2	3	2	13.4	13.4	13.4	81.879	696	696	6.33	2	2			1	1		1	2	2			1								0	50.433	9.3	4	2523200	2233700	289420
sp|O00468|AGRIN_HUMAN	sp|O00468|AGRIN_HUMAN	14	14	14	>sp|O00468|AGRIN_HUMAN Agrin OS=Homo sapiens GN=AGRN PE=1 SV=5	1	14	14	14	13	1	13	1	13	1	11.3	11.3	11.3	217.23	2067	2067	11.1						1		3	1	3		2		4			1				0	47.761	10.6	0.7	1025100	987600	37544
sp|O00469|PLOD2_HUMAN	sp|O00469|PLOD2_HUMAN	5	5	5	>sp|O00469|PLOD2_HUMAN Procollagen-lysine,2-oxoglutarate 5-dioxygenase 2 OS=Homo sapiens GN=PLOD2 PE=1 SV=2	1	5	5	5	4	1	4	1	4	1	9.9	9.9	9.9	84.685	737	737	12.8									1		2	1					2				0	10.571	8	1.9	543200	497130	46073
sp|O00471|EXOC5_HUMAN	sp|O00471|EXOC5_HUMAN	6	6	6	>sp|O00471|EXOC5_HUMAN Exocyst complex component 5 OS=Homo sapiens GN=EXOC5 PE=1 SV=1	1	6	6	6	6	2	6	2	6	2	11.3	11.3	11.3	81.852	708	708	10.2					1	1		1		1	1	2	1		1						0	29.436	11.3	4.8	1015900	894990	120950
sp|O00483|NDUA4_HUMAN	sp|O00483|NDUA4_HUMAN	2	2	2	>sp|O00483|NDUA4_HUMAN Cytochrome c oxidase subunit NDUFA4 OS=Homo sapiens GN=NDUFA4 PE=1 SV=1	1	2	2	2	2	1	2	1	2	1	27.2	27.2	27.2	9.3697	81	81	9.5						1			1		1	1									0	5.8626	27.2	14.8	2301700	1458500	843290
sp|O00487|PSDE_HUMAN	sp|O00487|PSDE_HUMAN	5	5	5	>sp|O00487|PSDE_HUMAN 26S proteasome non-ATPase regulatory subunit 14 OS=Homo sapiens GN=PSMD14 PE=1 SV=1	1	5	5	5	4	3	4	3	4	3	30.3	30.3	30.3	34.577	310	310	9.52	1	1				1	4	3	1	1	2	1	1	2	3						0	47.921	28.1	17.4	7204100	6390800	813260
sp|O00505|IMA4_HUMAN	sp|O00505|IMA4_HUMAN	8	5	5	>sp|O00505|IMA4_HUMAN Importin subunit alpha-4 OS=Homo sapiens GN=KPNA3 PE=1 SV=2	1	8	5	5	8	2	5	2	5	2	22.3	16.7	16.7	57.81	521	521	9.85	1					1	2	3	3								1		1	1	0	53.805	22.3	6.9	2534900	2371900	162990
sp|O00515|LAD1_HUMAN	sp|O00515|LAD1_HUMAN	1	1	1	>sp|O00515|LAD1_HUMAN Ladinin-1 OS=Homo sapiens GN=LAD1 PE=1 SV=2	1	1	1	1	1	0	1	0	1	0	3.3	3.3	3.3	57.13	517	517	14														1							0.0012943	2.6909	3.3	0	73879	73879	0
sp|O00541|PESC_HUMAN	sp|O00541|PESC_HUMAN	7	7	7	>sp|O00541|PESC_HUMAN Pescadillo homolog OS=Homo sapiens GN=PES1 PE=1 SV=1	1	7	7	7	6	2	6	2	6	2	17.2	17.2	17.2	68.002	588	588	11.9								1			2	1	3	1							0	19.684	14.5	4.3	1060300	1019400	40959
sp|O00560|SDCB1_HUMAN	sp|O00560|SDCB1_HUMAN	6	6	6	>sp|O00560|SDCB1_HUMAN Syntenin-1 OS=Homo sapiens GN=SDCBP PE=1 SV=1	1	6	6	6	6	2	6	2	6	2	42.6	42.6	42.6	32.444	298	298	9.65					1	1	2	2	1	2	3	4	1								0	110.52	42.6	18.1	4547300	4080900	466400
sp|O00566|MPP10_HUMAN	sp|O00566|MPP10_HUMAN	6	6	6	>sp|O00566|MPP10_HUMAN U3 small nucleolar ribonucleoprotein protein MPP10 OS=Homo sapiens GN=MPHOSPH10 PE=1 SV=2	1	6	6	6	6	1	6	1	6	1	14.1	14.1	14.1	78.863	681	681	10.1						1		2	2		1	1	1		1						0	19.218	14.1	2.9	1728800	1506200	222540
sp|O00567|NOP56_HUMAN	sp|O00567|NOP56_HUMAN	15	15	15	>sp|O00567|NOP56_HUMAN Nucleolar protein 56 OS=Homo sapiens GN=NOP56 PE=1 SV=4	1	15	15	15	13	9	13	9	13	9	41.8	41.8	41.8	66.049	594	594	9.15		1		2	5	4	6	6	8	4	2	5	4	1	2			1	1		0	219.26	37.4	25.8	14294000	11987000	2307200
sp|O00571|DDX3X_HUMAN;sp|O15523|DDX3Y_HUMAN	sp|O00571|DDX3X_HUMAN;sp|O15523|DDX3Y_HUMAN	12;9	11;8	11;8	>sp|O00571|DDX3X_HUMAN ATP-dependent RNA helicase DDX3X OS=Homo sapiens GN=DDX3X PE=1 SV=3;>sp|O15523|DDX3Y_HUMAN ATP-dependent RNA helicase DDX3Y OS=Homo sapiens GN=DDX3Y PE=1 SV=2	2	12	11	11	9	6	8	6	8	6	23.6	21.9	21.9	73.243	662	662;660	11.5	1	1			1	3	2	3	1	1	1	2	2	1		3	2	2	2	1	0	114.17	17.5	11.9	5567100	5004500	562620
sp|O00584|RNT2_HUMAN	sp|O00584|RNT2_HUMAN	2	2	2	>sp|O00584|RNT2_HUMAN Ribonuclease T2 OS=Homo sapiens GN=RNASET2 PE=1 SV=2	1	2	2	2	2	0	2	0	2	0	10.2	10.2	10.2	29.48	256	256	12.5								1									1				0	12.31	10.2	0	532990	532990	0
sp|O00592|PODXL_HUMAN	sp|O00592|PODXL_HUMAN	4	4	4	>sp|O00592|PODXL_HUMAN Podocalyxin OS=Homo sapiens GN=PODXL PE=1 SV=2	1	4	4	4	4	1	4	1	4	1	12.7	12.7	12.7	58.635	558	558	11.6	2	1					1	3									2	2	2	1	0	17.683	12.7	2.3	2524900	1384300	1140600
sp|O00622|CYR61_HUMAN	sp|O00622|CYR61_HUMAN	2	2	2	>sp|O00622|CYR61_HUMAN Protein CYR61 OS=Homo sapiens GN=CYR61 PE=1 SV=1	1	2	2	2	2	0	2	0	2	0	7.9	7.9	7.9	42.026	381	381	15.2												1		1			1	1			0	4.9444	7.9	0	149340	149340	0
sp|O00625|PIR_HUMAN	sp|O00625|PIR_HUMAN	1	1	1	>sp|O00625|PIR_HUMAN Pirin OS=Homo sapiens GN=PIR PE=1 SV=1	1	1	1	1	1	0	1	0	1	0	5.5	5.5	5.5	32.113	290	290	8								1													0	4.9672	5.5	0	95705	95705	0
sp|O00629|IMA3_HUMAN	sp|O00629|IMA3_HUMAN	11	11	8	>sp|O00629|IMA3_HUMAN Importin subunit alpha-3 OS=Homo sapiens GN=KPNA4 PE=1 SV=1	1	11	11	8	9	2	9	2	6	2	35.3	35.3	29.8	57.886	521	521	9.21		1			1	2	1	2	1		2	1	1	1			1				0	50.52	29.4	6	3303900	2710400	593490
sp|O00743|PPP6_HUMAN	sp|O00743|PPP6_HUMAN	5	5	5	>sp|O00743|PPP6_HUMAN Serine/threonine-protein phosphatase 6 catalytic subunit OS=Homo sapiens GN=PPP6C PE=1 SV=1	1	5	5	5	4	1	4	1	4	1	20	20	20	35.144	305	305	13.8									2							1	1	1			0	17.198	17	3	378890	338620	40269
sp|O00754|MA2B1_HUMAN	sp|O00754|MA2B1_HUMAN	8	8	8	>sp|O00754|MA2B1_HUMAN Lysosomal alpha-mannosidase OS=Homo sapiens GN=MAN2B1 PE=1 SV=3	1	8	8	8	8	1	8	1	8	1	11.9	11.9	11.9	113.74	1011	1011	12.9								3	1		1	2	2	3	2		1	1	1		0	55.141	11.9	1.2	1860400	1573200	287240
sp|O00762|UBE2C_HUMAN	sp|O00762|UBE2C_HUMAN	1	1	1	>sp|O00762|UBE2C_HUMAN Ubiquitin-conjugating enzyme E2 C OS=Homo sapiens GN=UBE2C PE=1 SV=1	1	1	1	1	1	0	1	0	1	0	7.3	7.3	7.3	19.652	179	179	9									1												0	3.1405	7.3	0	285120	285120	0
sp|O00764|PDXK_HUMAN	sp|O00764|PDXK_HUMAN	7	7	7	>sp|O00764|PDXK_HUMAN Pyridoxal kinase OS=Homo sapiens GN=PDXK PE=1 SV=1	1	7	7	7	6	4	6	4	6	4	32.4	32.4	32.4	35.102	312	312	8.08					2	2	1	5	1				1	1							0	34.487	29.2	17.6	3061500	2469300	592200
sp|O00767|ACOD_HUMAN	sp|O00767|ACOD_HUMAN	2	2	2	>sp|O00767|ACOD_HUMAN Acyl-CoA desaturase OS=Homo sapiens GN=SCD PE=1 SV=2	1	2	2	2	2	0	2	0	2	0	10.6	10.6	10.6	41.522	359	359	7.25	1				1						1	1									0	9.8617	10.6	0	229650	229650	0
sp|O14493|CLD4_HUMAN;sp|O95484|CLD9_HUMAN;sp|P56747|CLD6_HUMAN;sp|O15551|CLD3_HUMAN	sp|O14493|CLD4_HUMAN;sp|O95484|CLD9_HUMAN;sp|P56747|CLD6_HUMAN;sp|O15551|CLD3_HUMAN	1;1;1;1	1;1;1;1	1;1;1;1	>sp|O14493|CLD4_HUMAN Claudin-4 OS=Homo sapiens GN=CLDN4 PE=1 SV=1;>sp|O95484|CLD9_HUMAN Claudin-9 OS=Homo sapiens GN=CLDN9 PE=1 SV=1;>sp|P56747|CLD6_HUMAN Claudin-6 OS=Homo sapiens GN=CLDN6 PE=1 SV=2;>sp|O15551|CLD3_HUMAN Claudin-3 OS=Homo sapiens GN=CLDN	4	1	1	1	1	1	1	1	1	1	7.7	7.7	7.7	22.077	209	209;217;220;220	5.12		2			2	2	1	1													0	7.4618	7.7	7.7	1934700	1559000	375730
sp|O14497|ARI1A_HUMAN;sp|Q8NFD5|ARI1B_HUMAN	sp|O14497|ARI1A_HUMAN	11;2	11;2	11;2	>sp|O14497|ARI1A_HUMAN AT-rich interactive domain-containing protein 1A OS=Homo sapiens GN=ARID1A PE=1 SV=3	2	11	11	11	11	0	11	0	11	0	9.2	9.2	9.2	242.04	2285	2285;2236	14.1							2		3				2	1	1		4	2	1	1	0	37.414	9.2	0	1139600	1139600	0
sp|O14544|SOCS6_HUMAN	sp|O14544|SOCS6_HUMAN	1	1	1	>sp|O14544|SOCS6_HUMAN Suppressor of cytokine signaling 6 OS=Homo sapiens GN=SOCS6 PE=1 SV=2	1	1	1	1	1	0	1	0	1	0	3.2	3.2	3.2	59.527	535	535	20																				1	0.0036487	2.0236	3.2	0	43799	43799	0
sp|O14548|COX7R_HUMAN	sp|O14548|COX7R_HUMAN	3	3	3	>sp|O14548|COX7R_HUMAN Cytochrome c oxidase subunit 7A-related protein, mitochondrial OS=Homo sapiens GN=COX7A2L PE=1 SV=2	1	3	3	3	2	1	2	1	2	1	48.2	48.2	48.2	12.615	114	114	13											1	1	2	3							0	10.136	36.8	11.4	927520	706060	221460
sp|O14558|HSPB6_HUMAN	sp|O14558|HSPB6_HUMAN	1	1	1	>sp|O14558|HSPB6_HUMAN Heat shock protein beta-6 OS=Homo sapiens GN=HSPB6 PE=1 SV=2	1	1	1	1	1	0	1	0	1	0	8.1	8.1	8.1	17.135	160	160	19																		1	1	1	0	3.1997	8.1	0	130580	130580	0
sp|O14561|ACPM_HUMAN	sp|O14561|ACPM_HUMAN	2	2	2	>sp|O14561|ACPM_HUMAN Acyl carrier protein, mitochondrial OS=Homo sapiens GN=NDUFAB1 PE=1 SV=3	1	2	2	2	1	2	1	2	1	2	9.6	9.6	9.6	17.417	156	156	8.6							1	1	2	1											0	6.1059	9.6	9.6	2439700	1614600	825000
sp|O14562|UBFD1_HUMAN	sp|O14562|UBFD1_HUMAN	3	3	3	>sp|O14562|UBFD1_HUMAN Ubiquitin domain-containing protein UBFD1 OS=Homo sapiens GN=UBFD1 PE=1 SV=2	1	3	3	3	3	0	3	0	3	0	20.1	20.1	20.1	33.382	309	309	13								1				1	1						1		0	10.073	20.1	0	189120	189120	0
sp|O14579|COPE_HUMAN	sp|O14579|COPE_HUMAN	6	6	6	>sp|O14579|COPE_HUMAN Coatomer subunit epsilon OS=Homo sapiens GN=COPE PE=1 SV=3	1	6	6	6	5	2	5	2	5	2	38.6	38.6	38.6	34.482	308	308	11.9					1	1		4			2	1				1	1	1	1	1	0	110.76	30.2	15.6	1974500	1854500	119960
sp|P47813|IF1AX_HUMAN;sp|O14602|IF1AY_HUMAN	sp|P47813|IF1AX_HUMAN;sp|O14602|IF1AY_HUMAN	2;2	2;2	2;2	>sp|P47813|IF1AX_HUMAN Eukaryotic translation initiation factor 1A, X-chromosomal OS=Homo sapiens GN=EIF1AX PE=1 SV=2;>sp|O14602|IF1AY_HUMAN Eukaryotic translation initiation factor 1A, Y-chromosomal OS=Homo sapiens GN=EIF1AY PE=1 SV=4	2	2	2	2	2	1	2	1	2	1	31.9	31.9	31.9	16.46	144	144;144	11								1						1							0	18.148	31.9	20.8	934210	780270	153940
sp|O14617|AP3D1_HUMAN	sp|O14617|AP3D1_HUMAN	12	12	12	>sp|O14617|AP3D1_HUMAN AP-3 complex subunit delta-1 OS=Homo sapiens GN=AP3D1 PE=1 SV=1	1	12	12	12	11	3	11	3	11	3	16.1	16.1	16.1	130.16	1153	1153	12.1	1					1	4		1				1	1	1	1	1	2	2		0	41.862	15	4	1607700	1326600	281160
sp|O14618|CCS_HUMAN	sp|O14618|CCS_HUMAN	1	1	1	>sp|O14618|CCS_HUMAN Copper chaperone for superoxide dismutase OS=Homo sapiens GN=CCS PE=1 SV=1	1	1	1	1	1	0	1	0	1	0	4.7	4.7	4.7	29.04	274	274	6.5						1	1														0.0022472	2.2922	4.7	0	401870	401870	0
sp|O14657|TOR1B_HUMAN	sp|O14657|TOR1B_HUMAN	4	4	4	>sp|O14657|TOR1B_HUMAN Torsin-1B OS=Homo sapiens GN=TOR1B PE=1 SV=2	1	4	4	4	3	1	3	1	3	1	13.7	13.7	13.7	37.978	336	336	8.83					1	1		2				1		1							0	21.83	10.4	3.3	1325000	1088200	236820
sp|O14662|STX16_HUMAN	sp|O14662|STX16_HUMAN	4	4	4	>sp|O14662|STX16_HUMAN Syntaxin-16 OS=Homo sapiens GN=STX16 PE=1 SV=3	1	4	4	4	4	0	4	0	4	0	20.3	20.3	20.3	37.031	325	325	9					1		1		3						1						0	13.075	20.3	0	461940	461940	0
sp|O14672|ADA10_HUMAN	sp|O14672|ADA10_HUMAN	8	8	8	>sp|O14672|ADA10_HUMAN Disintegrin and metalloproteinase domain-containing protein 10 OS=Homo sapiens GN=ADAM10 PE=1 SV=1	1	8	8	8	5	6	5	6	5	6	14.2	14.2	14.2	84.141	748	748	12						1	1	2		2	2	2	3			1	1	1	1		0	75.063	9.9	10.3	3928600	3017500	911060
sp|Q99666|RGPD5_HUMAN;sp|O14715|RGPD8_HUMAN	sp|Q99666|RGPD5_HUMAN;sp|O14715|RGPD8_HUMAN	6;6	1;1	1;1	>sp|Q99666|RGPD5_HUMAN RANBP2-like and GRIP domain-containing protein 5/6 OS=Homo sapiens GN=RGPD5 PE=1 SV=3;>sp|O14715|RGPD8_HUMAN RANBP2-like and GRIP domain-containing protein 8 OS=Homo sapiens GN=RGPD8 PE=1 SV=2	2	6	1	1	6	1	1	0	1	0	4	0.7	0.7	198.92	1765	1765;1765	7							1														0.0013175	2.8586	4	0.7	77266	77266	0
sp|O14734|ACOT8_HUMAN	sp|O14734|ACOT8_HUMAN	3	3	3	>sp|O14734|ACOT8_HUMAN Acyl-coenzyme A thioesterase 8 OS=Homo sapiens GN=ACOT8 PE=1 SV=1	1	3	3	3	3	1	3	1	3	1	17.2	17.2	17.2	35.914	319	319	13								2						1			1	1			0	13.264	17.2	5	522430	474860	47569
sp|O14737|PDCD5_HUMAN	sp|O14737|PDCD5_HUMAN	6	6	6	>sp|O14737|PDCD5_HUMAN Programmed cell death protein 5 OS=Homo sapiens GN=PDCD5 PE=1 SV=3	1	6	6	6	5	3	5	3	5	3	45.6	45.6	45.6	14.285	125	125	10.2		1			1	1			1	1	2	2	1	3							0	48.199	36.8	27.2	2953100	2425500	527640
sp|O14744|ANM5_HUMAN	sp|O14744|ANM5_HUMAN	4	4	4	>sp|O14744|ANM5_HUMAN Protein arginine N-methyltransferase 5 OS=Homo sapiens GN=PRMT5 PE=1 SV=4	1	4	4	4	4	2	4	2	4	2	9.3	9.3	9.3	72.683	637	637	11.8					1	1	2				1	1	1					1	1	1	0	24.052	9.3	3.5	2617000	2327900	289100
sp|O14745|NHRF1_HUMAN	sp|O14745|NHRF1_HUMAN	8	8	8	>sp|O14745|NHRF1_HUMAN Na(+)/H(+) exchange regulatory cofactor NHE-RF1 OS=Homo sapiens GN=SLC9A3R1 PE=1 SV=4	1	8	8	8	6	4	6	4	6	4	38.5	38.5	38.5	38.868	358	358	5.69	2	4	2	2	2	3	4	2		3	2										0	125.38	31.3	18.4	7749800	6745000	1004800
sp|O14763|TR10B_HUMAN	sp|O14763|TR10B_HUMAN	2	2	2	>sp|O14763|TR10B_HUMAN Tumor necrosis factor receptor superfamily member 10B OS=Homo sapiens GN=TNFRSF10B PE=1 SV=2	1	2	2	2	2	0	2	0	2	0	5.5	5.5	5.5	47.878	440	440	10.5								1					1								0	3.6827	5.5	0	282030	282030	0
sp|O14773|TPP1_HUMAN	sp|O14773|TPP1_HUMAN	3	3	3	>sp|O14773|TPP1_HUMAN Tripeptidyl-peptidase 1 OS=Homo sapiens GN=TPP1 PE=1 SV=2	1	3	3	3	3	3	3	3	3	3	8.2	8.2	8.2	61.247	563	563	11.3	1	1			1	1	2	1						1	2	1	1	2		1	0	32.381	8.2	8.2	4878200	3421400	1456800
sp|O14776|TCRG1_HUMAN	sp|O14776|TCRG1_HUMAN	9	9	9	>sp|O14776|TCRG1_HUMAN Transcription elongation regulator 1 OS=Homo sapiens GN=TCERG1 PE=1 SV=2	1	9	9	9	7	4	7	4	7	4	12.8	12.8	12.8	123.9	1098	1098	9.1	1						2	1	1	1	1	2		1							0	18.645	11.5	3.6	3564200	2791300	772870
sp|O14777|NDC80_HUMAN	sp|O14777|NDC80_HUMAN	5	5	5	>sp|O14777|NDC80_HUMAN Kinetochore protein NDC80 homolog OS=Homo sapiens GN=NDC80 PE=1 SV=1	1	5	5	5	5	0	5	0	5	0	10.7	10.7	10.7	73.912	642	642	9.6							1	2				1	1								0	7.2577	10.7	0	425380	425380	0
sp|O14787|TNPO2_HUMAN	sp|O14787|TNPO2_HUMAN	7	5	5	>sp|O14787|TNPO2_HUMAN Transportin-2 OS=Homo sapiens GN=TNPO2 PE=1 SV=3	1	7	5	5	7	3	5	3	5	3	13.9	11.7	11.7	101.39	897	897	8.56	1	1			2	1	3	3						2	3						0	44.917	13.9	6.5	3008700	2538900	469780
sp|O14802|RPC1_HUMAN	sp|O14802|RPC1_HUMAN	1	1	1	>sp|O14802|RPC1_HUMAN DNA-directed RNA polymerase III subunit RPC1 OS=Homo sapiens GN=POLR3A PE=1 SV=2	1	1	1	1	1	0	1	0	1	0	1.3	1.3	1.3	155.64	1390	1390	15															1						0.0068509	1.6736	1.3	0	63980	63980	0
sp|O14818|PSA7_HUMAN;sp|Q8TAA3|PSA7L_HUMAN	sp|O14818|PSA7_HUMAN	7;3	7;3	7;3	>sp|O14818|PSA7_HUMAN Proteasome subunit alpha type-7 OS=Homo sapiens GN=PSMA7 PE=1 SV=1	2	7	7	7	6	5	6	5	6	5	37.1	37.1	37.1	27.887	248	248;256	5.94	1	2	2	2	5	6	7	5							1						0	323.31	33.5	27.8	20090000	15690000	4400700
sp|O14828|SCAM3_HUMAN	sp|O14828|SCAM3_HUMAN	7	7	7	>sp|O14828|SCAM3_HUMAN Secretory carrier-associated membrane protein 3 OS=Homo sapiens GN=SCAMP3 PE=1 SV=3	1	7	7	7	6	2	6	2	6	2	34.9	34.9	34.9	38.287	347	347	9.73	2								3		2	1		2		1					0	36.419	30.8	9.8	1972300	1775800	196580
sp|O14841|OPLA_HUMAN	sp|O14841|OPLA_HUMAN	3	3	3	>sp|O14841|OPLA_HUMAN 5-oxoprolinase OS=Homo sapiens GN=OPLAH PE=1 SV=3	1	3	3	3	3	0	3	0	3	0	4.3	4.3	4.3	137.46	1288	1288	12							1							1	1						0	8.5135	4.3	0	236120	236120	0
sp|O14867|BACH1_HUMAN	sp|O14867|BACH1_HUMAN	3	3	3	>sp|O14867|BACH1_HUMAN Transcription regulator protein BACH1 OS=Homo sapiens GN=BACH1 PE=1 SV=2	1	3	3	3	3	0	3	0	3	0	5.4	5.4	5.4	81.957	736	736	9.75						1			1	1				1							0	7.89	5.4	0	173550	173550	0
sp|O14874|BCKD_HUMAN	sp|O14874|BCKD_HUMAN	2	2	2	>sp|O14874|BCKD_HUMAN [3-methyl-2-oxobutanoate dehydrogenase [lipoamide]] kinase, mitochondrial OS=Homo sapiens GN=BCKDK PE=1 SV=2	1	2	2	2	2	0	2	0	2	0	7.8	7.8	7.8	46.36	412	412	12.5												1	1								0	4.7879	7.8	0	194370	194370	0
sp|O14879|IFIT3_HUMAN	sp|O14879|IFIT3_HUMAN	1	1	1	>sp|O14879|IFIT3_HUMAN Interferon-induced protein with tetratricopeptide repeats 3 OS=Homo sapiens GN=IFIT3 PE=1 SV=1	1	1	1	1	1	0	1	0	1	0	4.1	4.1	4.1	55.984	490	490	15															1						0	6.5477	4.1	0	196790	196790	0
sp|O14908|GIPC1_HUMAN;sp|Q8TF64|GIPC3_HUMAN	sp|O14908|GIPC1_HUMAN	7;1	7;1	7;1	>sp|O14908|GIPC1_HUMAN PDZ domain-containing protein GIPC1 OS=Homo sapiens GN=GIPC1 PE=1 SV=2	2	7	7	7	5	3	5	3	5	3	26.7	26.7	26.7	36.049	333	333;312	9.6					1		3	2	1	1							1	1			0	36.297	22.2	9	1478600	1319500	159150
sp|O14925|TIM23_HUMAN;sp|Q5SRD1|TI23B_HUMAN	sp|O14925|TIM23_HUMAN;sp|Q5SRD1|TI23B_HUMAN	2;2	2;2	2;2	>sp|O14925|TIM23_HUMAN Mitochondrial import inner membrane translocase subunit Tim23 OS=Homo sapiens GN=TIMM23 PE=1 SV=1;>sp|Q5SRD1|TI23B_HUMAN Putative mitochondrial import inner membrane translocase subunit Tim23B OS=Homo sapiens GN=TIMM23B PE=5 SV=2	2	2	2	2	2	2	2	2	2	2	17.7	17.7	17.7	21.943	209	209;257	6.67					1	1	3	1													0	54.16	17.7	17.7	1505400	1293300	212090
sp|O14929|HAT1_HUMAN	sp|O14929|HAT1_HUMAN	7	7	7	>sp|O14929|HAT1_HUMAN Histone acetyltransferase type B catalytic subunit OS=Homo sapiens GN=HAT1 PE=1 SV=1	1	7	7	7	6	2	6	2	6	2	24.6	24.6	24.6	49.512	419	419	8.7						1	4	1		2	1			1							0	24.385	21.5	6.9	1169500	965310	204170
sp|O14933|UB2L6_HUMAN	sp|O14933|UB2L6_HUMAN	1	1	1	>sp|O14933|UB2L6_HUMAN Ubiquitin/ISG15-conjugating enzyme E2 L6 OS=Homo sapiens GN=UBE2L6 PE=1 SV=4	1	1	1	1	1	0	1	0	1	0	9.8	9.8	9.8	17.769	153	153	7							2														0	4.4008	9.8	0	165370	165370	0
sp|O14936|CSKP_HUMAN	sp|O14936|CSKP_HUMAN	10	10	10	>sp|O14936|CSKP_HUMAN Peripheral plasma membrane protein CASK OS=Homo sapiens GN=CASK PE=1 SV=3	1	10	10	10	9	2	9	2	9	2	13.8	13.8	13.8	105.12	926	926	11.5									4		1	3	1		2						0	24.117	13.1	1.5	1684000	1355700	328370
sp|O14949|QCR8_HUMAN	sp|O14949|QCR8_HUMAN	2	2	2	>sp|O14949|QCR8_HUMAN Cytochrome b-c1 complex subunit 8 OS=Homo sapiens GN=UQCRQ PE=1 SV=4	1	2	2	2	1	1	1	1	1	1	24.4	24.4	24.4	9.9062	82	82	13.7													1	2							0	4.3295	15.9	8.5	549520	328400	221120
sp|P19105|ML12A_HUMAN;sp|O14950|ML12B_HUMAN;sp|P24844|MYL9_HUMAN	sp|P19105|ML12A_HUMAN;sp|O14950|ML12B_HUMAN;sp|P24844|MYL9_HUMAN	7;7;4	7;7;4	7;7;4	>sp|P19105|ML12A_HUMAN Myosin regulatory light chain 12A OS=Homo sapiens GN=MYL12A PE=1 SV=2;>sp|O14950|ML12B_HUMAN Myosin regulatory light chain 12B OS=Homo sapiens GN=MYL12B PE=1 SV=2;>sp|P24844|MYL9_HUMAN Myosin regulatory light polypeptide 9 OS=Homo sa	3	7	7	7	6	5	6	5	6	5	56.7	56.7	56.7	19.794	171	171;172;172	6.6	1	2	3	2	4	7	7	7	4			1	1	1							0	323.31	51.5	39.8	29754000	22367000	7386600
sp|O14964|HGS_HUMAN	sp|O14964|HGS_HUMAN	2	2	2	>sp|O14964|HGS_HUMAN Hepatocyte growth factor-regulated tyrosine kinase substrate OS=Homo sapiens GN=HGS PE=1 SV=1	1	2	2	2	2	0	2	0	2	0	6.3	6.3	6.3	86.191	777	777	14	1						1											1	2	1	0	43.045	6.3	0	1410100	1410100	0
sp|O14965|AURKA_HUMAN	sp|O14965|AURKA_HUMAN	2	2	2	>sp|O14965|AURKA_HUMAN Aurora kinase A OS=Homo sapiens GN=AURKA PE=1 SV=2	1	2	2	2	2	0	2	0	2	0	8.4	8.4	8.4	45.809	403	403	12.5										1					1						0	3.7976	8.4	0	78227	78227	0
sp|O14966|RAB7L_HUMAN;sp|P57729|RAB38_HUMAN;sp|Q13637|RAB32_HUMAN	sp|O14966|RAB7L_HUMAN;sp|P57729|RAB38_HUMAN;sp|Q13637|RAB32_HUMAN	1;1;1	1;1;1	1;1;1	>sp|O14966|RAB7L_HUMAN Ras-related protein Rab-7L1 OS=Homo sapiens GN=RAB29 PE=1 SV=1;>sp|P57729|RAB38_HUMAN Ras-related protein Rab-38 OS=Homo sapiens GN=RAB38 PE=1 SV=1;>sp|Q13637|RAB32_HUMAN Ras-related protein Rab-32 OS=Homo sapiens GN=RAB32 PE=1 SV=3	3	1	1	1	1	0	1	0	1	0	5.4	5.4	5.4	23.155	203	203;211;225	9									1												0.0013021	2.743	5.4	0	0	0	0
sp|O14974|MYPT1_HUMAN	sp|O14974|MYPT1_HUMAN	7	7	7	>sp|O14974|MYPT1_HUMAN Protein phosphatase 1 regulatory subunit 12A OS=Homo sapiens GN=PPP1R12A PE=1 SV=1	1	7	7	7	6	1	6	1	6	1	10.1	10.1	10.1	115.28	1030	1030	12.1						1		2	1		1		1				1	1	1		0	12.987	8.7	1.4	1335100	1226700	108420
sp|O14976|GAK_HUMAN	sp|O14976|GAK_HUMAN	10	10	10	>sp|O14976|GAK_HUMAN Cyclin-G-associated kinase OS=Homo sapiens GN=GAK PE=1 SV=2	1	10	10	10	10	0	10	0	10	0	10.1	10.1	10.1	143.19	1311	1311	9.17						3	1	2	3					3							0	27.871	10.1	0	891150	891150	0
sp|O14979|HNRDL_HUMAN	sp|O14979|HNRDL_HUMAN	3	3	3	>sp|O14979|HNRDL_HUMAN Heterogeneous nuclear ribonucleoprotein D-like OS=Homo sapiens GN=HNRNPDL PE=1 SV=3	1	3	3	3	3	1	3	1	3	1	9.3	9.3	9.3	46.437	420	420	6.12		1	1		1	1	1	2		1											0	17.821	9.3	1.9	3714700	3288800	425870
sp|O14980|XPO1_HUMAN	sp|O14980|XPO1_HUMAN	29	29	29	>sp|O14980|XPO1_HUMAN Exportin-1 OS=Homo sapiens GN=XPO1 PE=1 SV=1	1	29	29	29	25	15	25	15	25	15	36.2	36.2	36.2	123.38	1071	1071	10.8	3	4		1	4	4	6	10	10	4	6	8	6	1		2	5	7	5	3	0	323.31	32.6	19.1	22206000	17564000	4641800
sp|O14981|BTAF1_HUMAN	sp|O14981|BTAF1_HUMAN	1	1	1	>sp|O14981|BTAF1_HUMAN TATA-binding protein-associated factor 172 OS=Homo sapiens GN=BTAF1 PE=1 SV=2	1	1	1	1	1	0	1	0	1	0	0.6	0.6	0.6	206.89	1849	1849	13													1								0.0096154	1.3766	0.6	0	52613	52613	0
sp|O15020|SPTN2_HUMAN	sp|O15020|SPTN2_HUMAN	14	10	10	>sp|O15020|SPTN2_HUMAN Spectrin beta chain, non-erythrocytic 2 OS=Homo sapiens GN=SPTBN2 PE=1 SV=3	1	14	10	10	14	1	10	0	10	0	8.4	6.9	6.9	271.32	2390	2390	9.91					1		2	2	1	1		1	1		2						0	41.949	8.4	0.6	1655300	1655300	0
sp|O15027|SC16A_HUMAN	sp|O15027|SC16A_HUMAN	3	3	3	>sp|O15027|SC16A_HUMAN Protein transport protein Sec16A OS=Homo sapiens GN=SEC16A PE=1 SV=3	1	3	3	3	3	0	3	0	3	0	3	3	3	233.51	2179	2179	14.2							1								1		1	1			0	20.612	3	0	317750	317750	0
sp|O15031|PLXB2_HUMAN	sp|O15031|PLXB2_HUMAN	22	22	22	>sp|O15031|PLXB2_HUMAN Plexin-B2 OS=Homo sapiens GN=PLXNB2 PE=1 SV=3	1	22	22	22	18	9	18	9	18	9	18.2	18.2	18.2	205.12	1838	1838	11.8	1	1			2	3	3	7	4		4	8	4	4	1	2	3	3	3	3	0	125.77	15.3	7.7	10456000	8988900	1467500
sp|O15042|SR140_HUMAN	sp|O15042|SR140_HUMAN	6	6	6	>sp|O15042|SR140_HUMAN U2 snRNP-associated SURP motif-containing protein OS=Homo sapiens GN=U2SURP PE=1 SV=2	1	6	6	6	6	0	6	0	6	0	8.4	8.4	8.4	118.29	1029	1029	8.8					2	1	2			1	2		2								0	29.046	8.4	0	1218300	1218300	0
sp|O15061|SYNEM_HUMAN	sp|O15061|SYNEM_HUMAN	2	2	2	>sp|O15061|SYNEM_HUMAN Synemin OS=Homo sapiens GN=SYNM PE=1 SV=2	1	2	2	2	2	0	2	0	2	0	2	2	2	172.77	1565	1565	12										1				1							0	5.1722	2	0	172870	172870	0
sp|O15067|PUR4_HUMAN	sp|O15067|PUR4_HUMAN	9	9	9	>sp|O15067|PUR4_HUMAN Phosphoribosylformylglycinamidine synthase OS=Homo sapiens GN=PFAS PE=1 SV=4	1	9	9	9	9	1	9	1	9	1	10.5	10.5	10.5	144.73	1338	1338	13.4							2	3	1		2	2	1				2	2	2	2	0	21.325	10.5	2.1	1639900	1572000	67877
sp|O15084|ANR28_HUMAN	sp|O15084|ANR28_HUMAN	5	5	5	>sp|O15084|ANR28_HUMAN Serine/threonine-protein phosphatase 6 regulatory ankyrin repeat subunit A OS=Homo sapiens GN=ANKRD28 PE=1 SV=5	1	5	5	5	5	0	5	0	5	0	6.9	6.9	6.9	112.96	1053	1053	12.5									2	2	1	3				1	1			1	0	24.61	6.9	0	729840	729840	0
sp|O15091|MRRP3_HUMAN	sp|O15091|MRRP3_HUMAN	2	2	2	>sp|O15091|MRRP3_HUMAN Mitochondrial ribonuclease P protein 3 OS=Homo sapiens GN=KIAA0391 PE=1 SV=2	1	2	2	2	2	0	2	0	2	0	5.1	5.1	5.1	67.315	583	583	10.5								1					1								0	8.7423	5.1	0	127680	127680	0
sp|O15116|LSM1_HUMAN	sp|O15116|LSM1_HUMAN	1	1	1	>sp|O15116|LSM1_HUMAN U6 snRNA-associated Sm-like protein LSm1 OS=Homo sapiens GN=LSM1 PE=1 SV=1	1	1	1	1	1	0	1	0	1	0	12	12	12	15.179	133	133	11.5											1	1									0	3.753	12	0	195940	195940	0
sp|O15118|NPC1_HUMAN	sp|O15118|NPC1_HUMAN	2	2	2	>sp|O15118|NPC1_HUMAN Niemann-Pick C1 protein OS=Homo sapiens GN=NPC1 PE=1 SV=2	1	2	2	2	2	0	2	0	2	0	2	2	2	142.17	1278	1278	12											1	2	1								0	4.7188	2	0	325510	325510	0
sp|O15126|SCAM1_HUMAN	sp|O15126|SCAM1_HUMAN	2	2	2	>sp|O15126|SCAM1_HUMAN Secretory carrier-associated membrane protein 1 OS=Homo sapiens GN=SCAMP1 PE=1 SV=2	1	2	2	2	2	0	2	0	2	0	14.5	14.5	14.5	37.92	338	338	17.4															1	1	1		1	1	0	38.581	14.5	0	900010	900010	0
sp|O15127|SCAM2_HUMAN	sp|O15127|SCAM2_HUMAN	2	2	2	>sp|O15127|SCAM2_HUMAN Secretory carrier-associated membrane protein 2 OS=Homo sapiens GN=SCAMP2 PE=1 SV=2	1	2	2	2	2	2	2	2	2	2	9.7	9.7	9.7	36.648	329	329	5.8	1	1						1	2												0	16.499	9.7	9.7	1007000	703860	303170
sp|O15143|ARC1B_HUMAN	sp|O15143|ARC1B_HUMAN	4	4	3	>sp|O15143|ARC1B_HUMAN Actin-related protein 2/3 complex subunit 1B OS=Homo sapiens GN=ARPC1B PE=1 SV=3	1	4	4	3	3	1	3	1	2	1	17.5	17.5	11.3	40.949	372	372	13.3												1		2							0	24.408	15.3	2.2	728050	587350	140700
sp|O15144|ARPC2_HUMAN	sp|O15144|ARPC2_HUMAN	4	4	4	>sp|O15144|ARPC2_HUMAN Actin-related protein 2/3 complex subunit 2 OS=Homo sapiens GN=ARPC2 PE=1 SV=1	1	4	4	4	3	1	3	1	3	1	18.3	18.3	18.3	34.333	300	300	8.31	1	1	1				2	2	2	1				1	2						0	10.695	16	2.3	5045600	4823100	222500
sp|O15145|ARPC3_HUMAN	sp|O15145|ARPC3_HUMAN	2	2	2	>sp|O15145|ARPC3_HUMAN Actin-related protein 2/3 complex subunit 3 OS=Homo sapiens GN=ARPC3 PE=1 SV=3	1	2	2	2	2	1	2	1	2	1	13.5	13.5	13.5	20.546	178	178	12.2					1	2	1										1	1	1	1	0	8.7806	13.5	6.2	767160	612240	154930
sp|O15155|BET1_HUMAN	sp|O15155|BET1_HUMAN	1	1	1	>sp|O15155|BET1_HUMAN BET1 homolog OS=Homo sapiens GN=BET1 PE=1 SV=1	1	1	1	1	1	1	1	1	1	1	15.3	15.3	15.3	13.289	118	118	7							2														0	10.153	15.3	15.3	467210	329490	137720
sp|O15156|ZBT7B_HUMAN	sp|O15156|ZBT7B_HUMAN	1	1	1	>sp|O15156|ZBT7B_HUMAN Zinc finger and BTB domain-containing protein 7B OS=Homo sapiens GN=ZBTB7B PE=1 SV=2	1	1	1	1	1	0	1	0	1	0	2	2	2	58.026	539	539	14														1							0.0036702	2.0781	2	0	40443	40443	0
sp|O15160|RPAC1_HUMAN	sp|O15160|RPAC1_HUMAN	7	7	7	>sp|O15160|RPAC1_HUMAN DNA-directed RNA polymerases I and III subunit RPAC1 OS=Homo sapiens GN=POLR1C PE=1 SV=1	1	7	7	7	7	2	7	2	7	2	28.6	28.6	28.6	39.249	346	346	9						4	2		1			2	1		1						0	29.959	28.6	10.7	2307200	2020600	286590
sp|O15164|TIF1A_HUMAN	sp|O15164|TIF1A_HUMAN	3	3	3	>sp|O15164|TIF1A_HUMAN Transcription intermediary factor 1-alpha OS=Homo sapiens GN=TRIM24 PE=1 SV=3	1	3	3	3	3	0	3	0	3	0	3.6	3.6	3.6	116.83	1050	1050	11.3						1							1		1						0	8.9219	3.6	0	244080	244080	0
sp|O15173|PGRC2_HUMAN	sp|O15173|PGRC2_HUMAN	5	5	5	>sp|O15173|PGRC2_HUMAN Membrane-associated progesterone receptor component 2 OS=Homo sapiens GN=PGRMC2 PE=1 SV=1	1	5	5	5	5	3	5	3	5	3	32.3	32.3	32.3	23.818	223	223	7.32	3	2		1	1	3	4	3		1				1		1	1	1			0	44.154	32.3	18.4	5847500	4961300	886240
sp|P84022|SMAD3_HUMAN;sp|Q15796|SMAD2_HUMAN;sp|O15198|SMAD9_HUMAN;sp|Q99717|SMAD5_HUMAN;sp|Q15797|SMAD1_HUMAN	sp|P84022|SMAD3_HUMAN;sp|Q15796|SMAD2_HUMAN;sp|O15198|SMAD9_HUMAN;sp|Q99717|SMAD5_HUMAN;sp|Q15797|SMAD1_HUMAN	2;2;2;1;1	2;2;2;1;1	2;2;2;1;1	>sp|P84022|SMAD3_HUMAN Mothers against decapentaplegic homolog 3 OS=Homo sapiens GN=SMAD3 PE=1 SV=1;>sp|Q15796|SMAD2_HUMAN Mothers against decapentaplegic homolog 2 OS=Homo sapiens GN=SMAD2 PE=1 SV=1;>sp|O15198|SMAD9_HUMAN Mothers against decapentaplegic h	5	2	2	2	2	0	2	0	2	0	5.6	5.6	5.6	48.08	425	425;467;467;465;465	14											1			2			1				0	5.7102	5.6	0	204630	204630	0
sp|O15212|PFD6_HUMAN	sp|O15212|PFD6_HUMAN	2	2	2	>sp|O15212|PFD6_HUMAN Prefoldin subunit 6 OS=Homo sapiens GN=PFDN6 PE=1 SV=1	1	2	2	2	2	1	2	1	2	1	15.5	15.5	15.5	14.582	129	129	9.71	2					2	2	2	2								1	1	1	1	0	21.532	15.5	9.3	3348400	3166100	182340
sp|O15213|WDR46_HUMAN	sp|O15213|WDR46_HUMAN	1	1	1	>sp|O15213|WDR46_HUMAN WD repeat-containing protein 46 OS=Homo sapiens GN=WDR46 PE=1 SV=3	1	1	1	1	1	0	1	0	1	0	2.5	2.5	2.5	68.07	610	610	10										1											0.0013028	2.7458	2.5	0	85632	85632	0
sp|O15230|LAMA5_HUMAN	sp|O15230|LAMA5_HUMAN	8	8	8	>sp|O15230|LAMA5_HUMAN Laminin subunit alpha-5 OS=Homo sapiens GN=LAMA5 PE=1 SV=8	1	8	8	8	8	0	8	0	8	0	3.5	3.5	3.5	399.73	3695	3695	14.1								1		1		1	1	2	1			2	1		0	12.874	3.5	0	779510	779510	0
sp|O15231|ZN185_HUMAN	sp|O15231|ZN185_HUMAN	3	3	3	>sp|O15231|ZN185_HUMAN Zinc finger protein 185 OS=Homo sapiens GN=ZNF185 PE=1 SV=3	1	3	3	3	2	1	2	1	2	1	9.7	9.7	9.7	73.525	689	689	15									1								1		1		0	5.1215	7.3	2.5	215020	215020	0
sp|O15234|CASC3_HUMAN	sp|O15234|CASC3_HUMAN	1	1	1	>sp|O15234|CASC3_HUMAN Protein CASC3 OS=Homo sapiens GN=CASC3 PE=1 SV=2	1	1	1	1	1	0	1	0	1	0	2.4	2.4	2.4	76.277	703	703	18																	1		1		0	7.6093	2.4	0	116310	116310	0
sp|O15258|RER1_HUMAN	sp|O15258|RER1_HUMAN	2	2	2	>sp|O15258|RER1_HUMAN Protein RER1 OS=Homo sapiens GN=RER1 PE=1 SV=1	1	2	2	2	2	1	2	1	2	1	14.8	14.8	14.8	22.958	196	196	8.33						1	1					1									0	9.097	14.8	5.6	355340	239630	115710
sp|O15260|SURF4_HUMAN	sp|O15260|SURF4_HUMAN	3	3	3	>sp|O15260|SURF4_HUMAN Surfeit locus protein 4 OS=Homo sapiens GN=SURF4 PE=1 SV=3	1	3	3	3	3	1	3	1	3	1	15.2	15.2	15.2	30.394	269	269	10.9						1	3		2							1	1			1	0	46.469	15.2	6.7	1395900	1038300	357560
sp|O15269|SPTC1_HUMAN	sp|O15269|SPTC1_HUMAN	2	2	2	>sp|O15269|SPTC1_HUMAN Serine palmitoyltransferase 1 OS=Homo sapiens GN=SPTLC1 PE=1 SV=1	1	2	2	2	2	1	2	1	2	1	6.6	6.6	6.6	52.743	473	473	10.6	1					1		2							2	2					0	30.614	6.6	3	1235900	953390	282540
sp|O15270|SPTC2_HUMAN	sp|O15270|SPTC2_HUMAN	8	8	8	>sp|O15270|SPTC2_HUMAN Serine palmitoyltransferase 2 OS=Homo sapiens GN=SPTLC2 PE=1 SV=1	1	8	8	8	7	2	7	2	7	2	20.1	20.1	20.1	62.924	562	562	12.9						2					1	2		1			1	1		1	0	13.103	17.8	3.6	676200	497640	178560
sp|O15294|OGT1_HUMAN	sp|O15294|OGT1_HUMAN	12	12	12	>sp|O15294|OGT1_HUMAN UDP-N-acetylglucosamine--peptide N-acetylglucosaminyltransferase 110 kDa subunit OS=Homo sapiens GN=OGT PE=1 SV=3	1	12	12	12	11	1	11	1	11	1	18.5	18.5	18.5	116.92	1046	1046	12.8						1	1	2			3	4	4	2	1	2		1	1	1	0	51.448	17	1.5	2611400	2544800	66626
sp|O15305|PMM2_HUMAN	sp|O15305|PMM2_HUMAN	3	3	3	>sp|O15305|PMM2_HUMAN Phosphomannomutase 2 OS=Homo sapiens GN=PMM2 PE=1 SV=1	1	3	3	3	2	2	2	2	2	2	17.5	17.5	17.5	28.082	246	246	10.2						2	1									2					0	15.377	12.6	13	518730	389330	129400
sp|O15320|CTGE5_HUMAN	sp|O15320|CTGE5_HUMAN	4	4	4	>sp|O15320|CTGE5_HUMAN cTAGE family member 5 OS=Homo sapiens GN=CTAGE5 PE=1 SV=4	1	4	4	4	2	2	2	2	2	2	9	9	9	90.995	804	804	12										1				1							0	28.681	4	5	3859200	97623	3761600
sp|O15321|TM9S1_HUMAN	sp|O15321|TM9S1_HUMAN	4	4	4	>sp|O15321|TM9S1_HUMAN Transmembrane 9 superfamily member 1 OS=Homo sapiens GN=TM9SF1 PE=2 SV=2	1	4	4	4	4	0	4	0	4	0	10.4	10.4	10.4	68.86	606	606	10.6						1		1			1			2							0	13.81	10.4	0	482290	482290	0
sp|O15327|INP4B_HUMAN	sp|O15327|INP4B_HUMAN	11	11	11	>sp|O15327|INP4B_HUMAN Type II inositol 3,4-bisphosphate 4-phosphatase OS=Homo sapiens GN=INPP4B PE=2 SV=4	1	11	11	11	11	1	11	1	11	1	17.6	17.6	17.6	104.74	924	924	11.5						1	1	1			3	3	1	1	1		1				0	40.974	17.6	1.4	1371100	1238000	133050
sp|O15344|TRI18_HUMAN	sp|O15344|TRI18_HUMAN	1	1	1	>sp|O15344|TRI18_HUMAN E3 ubiquitin-protein ligase Midline-1 OS=Homo sapiens GN=MID1 PE=1 SV=1	1	1	1	1	1	0	1	0	1	0	1.6	1.6	1.6	75.25	667	667	12												1									0	3.3923	1.6	0	37449	37449	0
sp|O15347|HMGB3_HUMAN	sp|O15347|HMGB3_HUMAN	3	3	3	>sp|O15347|HMGB3_HUMAN High mobility group protein B3 OS=Homo sapiens GN=HMGB3 PE=1 SV=4	1	3	3	3	3	2	3	2	3	2	13.5	13.5	13.5	22.98	200	200	7.2	2								1			1	1								0	4.7066	13.5	13.5	1246200	742100	504100
sp|O15355|PPM1G_HUMAN	sp|O15355|PPM1G_HUMAN	8	8	8	>sp|O15355|PPM1G_HUMAN Protein phosphatase 1G OS=Homo sapiens GN=PPM1G PE=1 SV=1	1	8	8	8	7	7	7	7	7	7	21.1	21.1	21.1	59.271	546	546	7	1	2			3	3	5	5	2			1						1			0	71.384	17.6	18.9	6901200	6067300	833960
sp|O15357|SHIP2_HUMAN	sp|O15357|SHIP2_HUMAN	6	6	6	>sp|O15357|SHIP2_HUMAN Phosphatidylinositol 3,4,5-trisphosphate 5-phosphatase 2 OS=Homo sapiens GN=INPPL1 PE=1 SV=2	1	6	6	6	6	0	6	0	6	0	6.9	6.9	6.9	138.6	1258	1258	10.3								1	2		1	1	1								0	8.4208	6.9	0	270630	270630	0
sp|O15371|EIF3D_HUMAN	sp|O15371|EIF3D_HUMAN	8	8	8	>sp|O15371|EIF3D_HUMAN Eukaryotic translation initiation factor 3 subunit D OS=Homo sapiens GN=EIF3D PE=1 SV=1	1	8	8	8	8	1	8	1	8	1	25.7	25.7	25.7	63.972	548	548	9.25	1	1			2	2	2	1	2	2	3	5		2		1					0	131.38	25.7	2.6	5051200	4746900	304230
sp|O15372|EIF3H_HUMAN	sp|O15372|EIF3H_HUMAN	6	6	6	>sp|O15372|EIF3H_HUMAN Eukaryotic translation initiation factor 3 subunit H OS=Homo sapiens GN=EIF3H PE=1 SV=1	1	6	6	6	4	3	4	3	4	3	23.6	23.6	23.6	39.93	352	352	11.7							1	1			2	2	2		2						0	26.989	17.3	9.4	2794800	2690800	104010
sp|O15379|HDAC3_HUMAN	sp|O15379|HDAC3_HUMAN	1	1	1	>sp|O15379|HDAC3_HUMAN Histone deacetylase 3 OS=Homo sapiens GN=HDAC3 PE=1 SV=2	1	1	1	1	0	1	0	1	0	1	3.5	3.5	3.5	48.847	428	428	NaN																					0	7.9416	0	3.5	0	0	0
sp|O15382|BCAT2_HUMAN	sp|O15382|BCAT2_HUMAN	9	9	9	>sp|O15382|BCAT2_HUMAN Branched-chain-amino-acid aminotransferase, mitochondrial OS=Homo sapiens GN=BCAT2 PE=1 SV=2	1	9	9	9	6	6	6	6	6	6	35.2	35.2	35.2	44.287	392	392	12.2									3		2	2	2	1	2	1					0	126.81	27.6	19.4	6488100	4071700	2416300
sp|O15397|IPO8_HUMAN	sp|O15397|IPO8_HUMAN	4	4	4	>sp|O15397|IPO8_HUMAN Importin-8 OS=Homo sapiens GN=IPO8 PE=1 SV=2	1	4	4	4	4	0	4	0	4	0	4.8	4.8	4.8	119.94	1037	1037	15.2												1		1			1	1			0	7.032	4.8	0	189780	189780	0
sp|O15400|STX7_HUMAN	sp|O15400|STX7_HUMAN	4	4	4	>sp|O15400|STX7_HUMAN Syntaxin-7 OS=Homo sapiens GN=STX7 PE=1 SV=4	1	4	4	4	4	1	4	1	4	1	27.2	27.2	27.2	29.815	261	261	8.57						1	2	1	2					1							0	16.304	27.2	5.7	1331000	1253000	78045
sp|O15427|MOT4_HUMAN	sp|O15427|MOT4_HUMAN	1	1	1	>sp|O15427|MOT4_HUMAN Monocarboxylate transporter 4 OS=Homo sapiens GN=SLC16A3 PE=1 SV=1	1	1	1	1	1	1	1	1	1	1	1.7	1.7	1.7	49.469	465	465	12											1	1	1								0.0024863	2.2552	1.7	1.7	406900	301330	105580
sp|O15438|MRP3_HUMAN	sp|O15438|MRP3_HUMAN	3	3	3	>sp|O15438|MRP3_HUMAN Canalicular multispecific organic anion transporter 2 OS=Homo sapiens GN=ABCC3 PE=1 SV=3	1	3	3	3	3	0	3	0	3	0	2.8	2.8	2.8	169.34	1527	1527	15													1	1				1			0	4.2428	2.8	0	118600	118600	0
sp|O15439|MRP4_HUMAN	sp|O15439|MRP4_HUMAN	2	2	2	>sp|O15439|MRP4_HUMAN Multidrug resistance-associated protein 4 OS=Homo sapiens GN=ABCC4 PE=1 SV=3	1	2	2	2	2	0	2	0	2	0	1.8	1.8	1.8	149.52	1325	1325	11										1		1									0.0057238	1.791	1.8	0	145600	145600	0
sp|O15446|RPA34_HUMAN	sp|O15446|RPA34_HUMAN	8	8	8	>sp|O15446|RPA34_HUMAN DNA-directed RNA polymerase I subunit RPA34 OS=Homo sapiens GN=CD3EAP PE=1 SV=1	1	8	8	8	7	2	7	2	7	2	33.9	33.9	33.9	54.985	510	510	11.8							2	1	3	2							2		2		0	49.143	31.6	7.1	1216500	1122300	94214
sp|O15479|MAGB2_HUMAN	sp|O15479|MAGB2_HUMAN	2	2	2	>sp|O15479|MAGB2_HUMAN Melanoma-associated antigen B2 OS=Homo sapiens GN=MAGEB2 PE=1 SV=3	1	2	2	2	1	1	1	1	1	1	10.3	10.3	10.3	35.277	319	319	10										1											0	4.4537	6.9	3.4	626110	544990	81118
sp|O15498|YKT6_HUMAN	sp|O15498|YKT6_HUMAN	3	3	3	>sp|O15498|YKT6_HUMAN Synaptobrevin homolog YKT6 OS=Homo sapiens GN=YKT6 PE=1 SV=1	1	3	3	3	3	0	3	0	3	0	17.2	17.2	17.2	22.417	198	198	10.5						1	1						1			1					0	8.9282	17.2	0	667160	667160	0
sp|O15511|ARPC5_HUMAN	sp|O15511|ARPC5_HUMAN	4	4	4	>sp|O15511|ARPC5_HUMAN Actin-related protein 2/3 complex subunit 5 OS=Homo sapiens GN=ARPC5 PE=1 SV=3	1	4	4	4	3	1	3	1	3	1	39.7	39.7	39.7	16.32	151	151	15.7												2	2			1	2	1	1	1	0	21.568	31.8	7.9	1614500	1073200	541230
sp|O15514|RPB4_HUMAN	sp|O15514|RPB4_HUMAN	2	2	2	>sp|O15514|RPB4_HUMAN DNA-directed RNA polymerase II subunit RPB4 OS=Homo sapiens GN=POLR2D PE=1 SV=1	1	2	2	2	2	1	2	1	2	1	17.6	17.6	17.6	16.311	142	142	10.5							1							1							0	9.5945	17.6	11.3	253840	193170	60669
sp|O15525|MAFG_HUMAN	sp|O15525|MAFG_HUMAN	2	2	2	>sp|O15525|MAFG_HUMAN Transcription factor MafG OS=Homo sapiens GN=MAFG PE=1 SV=1	1	2	2	2	2	0	2	0	2	0	15.4	15.4	15.4	17.849	162	162	19																		1	1	1	0	4.8709	15.4	0	108820	108820	0
sp|O15533|TPSN_HUMAN	sp|O15533|TPSN_HUMAN	1	1	1	>sp|O15533|TPSN_HUMAN Tapasin OS=Homo sapiens GN=TAPBP PE=1 SV=1	1	1	1	1	1	0	1	0	1	0	2.2	2.2	2.2	47.625	448	448	19																		1		1	0.0013154	2.8431	2.2	0	120820	120820	0
sp|O15541|R113A_HUMAN	sp|O15541|R113A_HUMAN	1	1	1	>sp|O15541|R113A_HUMAN RING finger protein 113A OS=Homo sapiens GN=RNF113A PE=1 SV=1	1	1	1	1	1	0	1	0	1	0	4.7	4.7	4.7	38.787	343	343	11											2										0.0029725	2.212	4.7	0	51667	51667	0
sp|O43143|DHX15_HUMAN	sp|O43143|DHX15_HUMAN	9	9	9	>sp|O43143|DHX15_HUMAN Pre-mRNA-splicing factor ATP-dependent RNA helicase DHX15 OS=Homo sapiens GN=DHX15 PE=1 SV=2	1	9	9	9	9	1	9	1	9	1	14.1	14.1	14.1	90.932	795	795	13		1			1	1	1			1	2	5	3			1	1	2	2	2	0	31.358	14.1	1.5	4248000	3889600	358380
sp|O43148|MCES_HUMAN	sp|O43148|MCES_HUMAN	8	8	8	>sp|O43148|MCES_HUMAN mRNA cap guanine-N7 methyltransferase OS=Homo sapiens GN=RNMT PE=1 SV=1	1	8	8	8	7	4	7	4	7	4	26.9	26.9	26.9	54.843	476	476	9.57					1	2	2	2		1	1	1	2	2							0	42.867	25.2	13.7	3210900	2765400	445430
sp|O43150|ASAP2_HUMAN	sp|O43150|ASAP2_HUMAN	3	2	2	>sp|O43150|ASAP2_HUMAN Arf-GAP with SH3 domain, ANK repeat and PH domain-containing protein 2 OS=Homo sapiens GN=ASAP2 PE=1 SV=3	1	3	2	2	3	0	2	0	2	0	4.6	3.6	3.6	111.65	1006	1006	9.5							1					1									0	12.4	4.6	0	216290	216290	0
sp|O43156|TTI1_HUMAN	sp|O43156|TTI1_HUMAN	1	1	1	>sp|O43156|TTI1_HUMAN TELO2-interacting protein 1 homolog OS=Homo sapiens GN=TTI1 PE=1 SV=3	1	1	1	1	1	0	1	0	1	0	1.3	1.3	1.3	122.07	1089	1089	18																	1	1	1		0	3.4771	1.3	0	115340	115340	0
sp|O43157|PLXB1_HUMAN	sp|O43157|PLXB1_HUMAN	3	3	3	>sp|O43157|PLXB1_HUMAN Plexin-B1 OS=Homo sapiens GN=PLXNB1 PE=1 SV=3	1	3	3	3	3	0	3	0	3	0	3	3	3	232.3	2135	2135	13.7										1					1	1					0	6.7092	3	0	152270	152270	0
sp|O43169|CYB5B_HUMAN	sp|O43169|CYB5B_HUMAN	4	4	4	>sp|O43169|CYB5B_HUMAN Cytochrome b5 type B OS=Homo sapiens GN=CYB5B PE=1 SV=2	1	4	4	4	3	1	3	1	3	1	52.1	52.1	52.1	16.332	146	146	8.25		1				1	2			1	2	1									0	20.581	52.1	8.2	1566300	1276800	289530
sp|O43172|PRP4_HUMAN	sp|O43172|PRP4_HUMAN	6	6	6	>sp|O43172|PRP4_HUMAN U4/U6 small nuclear ribonucleoprotein Prp4 OS=Homo sapiens GN=PRPF4 PE=1 SV=2	1	6	6	6	6	1	6	1	6	1	13.2	13.2	13.2	58.449	522	522	13.3							1		1		1	1			1	2	2				0	33.516	13.2	3.1	1453500	1373300	80152
sp|O43175|SERA_HUMAN	sp|O43175|SERA_HUMAN	16	16	16	>sp|O43175|SERA_HUMAN D-3-phosphoglycerate dehydrogenase OS=Homo sapiens GN=PHGDH PE=1 SV=4	1	16	16	16	15	7	15	7	15	7	38.3	38.3	38.3	56.65	533	533	10.6	6	3	2	3	6	6	6	9	7		1	2	3	4	3	8	5	5	5	5	0	323.31	36.2	18.2	35967000	30873000	5093600
sp|O43181|NDUS4_HUMAN	sp|O43181|NDUS4_HUMAN	1	1	1	>sp|O43181|NDUS4_HUMAN NADH dehydrogenase [ubiquinone] iron-sulfur protein 4, mitochondrial OS=Homo sapiens GN=NDUFS4 PE=1 SV=1	1	1	1	1	1	0	1	0	1	0	8.6	8.6	8.6	20.108	175	175	6.67	1								1	1											0	4.494	8.6	0	441430	441430	0
sp|O43237|DC1L2_HUMAN	sp|O43237|DC1L2_HUMAN	7	7	7	>sp|O43237|DC1L2_HUMAN Cytoplasmic dynein 1 light intermediate chain 2 OS=Homo sapiens GN=DYNC1LI2 PE=1 SV=1	1	7	7	7	6	1	6	1	6	1	20.5	20.5	20.5	54.099	492	492	8	1						3	2	4					1							0	99.08	20.5	2.6	1579100	1506900	72166
sp|O43242|PSMD3_HUMAN	sp|O43242|PSMD3_HUMAN	9	9	9	>sp|O43242|PSMD3_HUMAN 26S proteasome non-ATPase regulatory subunit 3 OS=Homo sapiens GN=PSMD3 PE=1 SV=2	1	9	9	9	7	3	7	3	7	3	23.2	23.2	23.2	60.977	534	534	7.12	1	1				2	5	2	5	1											0	42.269	19.5	5.4	2908000	2409200	498720
sp|O43251|RFOX2_HUMAN	sp|O43251|RFOX2_HUMAN	1	1	1	>sp|O43251|RFOX2_HUMAN RNA binding protein fox-1 homolog 2 OS=Homo sapiens GN=RBFOX2 PE=1 SV=3	1	1	1	1	1	0	1	0	1	0	6.7	6.7	6.7	41.373	390	390	11											1										0	19.079	6.7	0	136860	136860	0
sp|O43252|PAPS1_HUMAN;sp|O95340|PAPS2_HUMAN	sp|O43252|PAPS1_HUMAN	4;1	4;1	4;1	>sp|O43252|PAPS1_HUMAN Bifunctional 3-phosphoadenosine 5-phosphosulfate synthase 1 OS=Homo sapiens GN=PAPSS1 PE=1 SV=2	2	4	4	4	4	0	4	0	4	0	8.8	8.8	8.8	70.832	624	624;614	12.5						2	2										1	1	1	1	0	24.799	8.8	0	924010	924010	0
sp|O43264|ZW10_HUMAN	sp|O43264|ZW10_HUMAN	14	14	14	>sp|O43264|ZW10_HUMAN Centromere/kinetochore protein zw10 homolog OS=Homo sapiens GN=ZW10 PE=1 SV=3	1	14	14	14	13	4	13	4	13	4	27.5	27.5	27.5	88.828	779	779	9.18	1						6	3	4	1	1	2	2	2							0	101.31	26.3	6.8	3365300	2932300	433010
sp|O43278|SPIT1_HUMAN	sp|O43278|SPIT1_HUMAN	1	1	1	>sp|O43278|SPIT1_HUMAN Kunitz-type protease inhibitor 1 OS=Homo sapiens GN=SPINT1 PE=1 SV=2	1	1	1	1	1	0	1	0	1	0	1.7	1.7	1.7	58.397	529	529	13													1								0.0022613	2.3517	1.7	0	121390	121390	0
sp|O43286|B4GT5_HUMAN	sp|O43286|B4GT5_HUMAN	1	1	1	>sp|O43286|B4GT5_HUMAN Beta-1,4-galactosyltransferase 5 OS=Homo sapiens GN=B4GALT5 PE=2 SV=1	1	1	1	1	1	0	1	0	1	0	3.1	3.1	3.1	45.118	388	388	12												1									0.0094015	1.3977	3.1	0	97868	97868	0
sp|O43290|SNUT1_HUMAN	sp|O43290|SNUT1_HUMAN	11	11	11	>sp|O43290|SNUT1_HUMAN U4/U6.U5 tri-snRNP-associated protein 1 OS=Homo sapiens GN=SART1 PE=1 SV=1	1	11	11	11	8	3	8	3	8	3	21	21	21	90.254	800	800	10					1	3	3	3				1	1					1	1	1	0	51.677	16.4	4.6	2179100	1824800	354330
sp|O43291|SPIT2_HUMAN	sp|O43291|SPIT2_HUMAN	1	1	1	>sp|O43291|SPIT2_HUMAN Kunitz-type protease inhibitor 2 OS=Homo sapiens GN=SPINT2 PE=1 SV=2	1	1	1	1	0	1	0	1	0	1	6.3	6.3	6.3	28.228	252	252	NaN																					0	4.6323	0	6.3	39019	0	39019
sp|O43292|GPAA1_HUMAN	sp|O43292|GPAA1_HUMAN	1	1	1	>sp|O43292|GPAA1_HUMAN Glycosylphosphatidylinositol anchor attachment 1 protein OS=Homo sapiens GN=GPAA1 PE=1 SV=3	1	1	1	1	1	0	1	0	1	0	1.8	1.8	1.8	67.622	621	621	12												1									0.009795	1.3361	1.8	0	65268	65268	0
sp|O43293|DAPK3_HUMAN	sp|O43293|DAPK3_HUMAN	2	2	2	>sp|O43293|DAPK3_HUMAN Death-associated protein kinase 3 OS=Homo sapiens GN=DAPK3 PE=1 SV=1	1	2	2	2	2	0	2	0	2	0	5.7	5.7	5.7	52.535	454	454	7.4							3	2													0	9.6656	5.7	0	472780	472780	0
sp|O43324|MCA3_HUMAN	sp|O43324|MCA3_HUMAN	3	3	3	>sp|O43324|MCA3_HUMAN Eukaryotic translation elongation factor 1 epsilon-1 OS=Homo sapiens GN=EEF1E1 PE=1 SV=1	1	3	3	3	3	0	3	0	3	0	26.4	26.4	26.4	19.81	174	174	14.8							1							1		1	1			1	0	41.293	26.4	0	2067400	2067400	0
sp|O43390|HNRPR_HUMAN	sp|O43390|HNRPR_HUMAN	8	5	5	>sp|O43390|HNRPR_HUMAN Heterogeneous nuclear ribonucleoprotein R OS=Homo sapiens GN=HNRNPR PE=1 SV=1	1	8	5	5	7	5	5	3	5	3	15	10.6	10.6	70.942	633	633	7.67				1	1	3	3	3	2			1	1								0	41.472	13.1	9.6	3084100	2501800	582340
sp|O43395|PRPF3_HUMAN	sp|O43395|PRPF3_HUMAN	6	6	6	>sp|O43395|PRPF3_HUMAN U4/U6 small nuclear ribonucleoprotein Prp3 OS=Homo sapiens GN=PRPF3 PE=1 SV=2	1	6	6	6	6	0	6	0	6	0	14.8	14.8	14.8	77.528	683	683	10.1	1						2	1	1			1	1	2		1					0	14.664	14.8	0	880120	880120	0
sp|O43396|TXNL1_HUMAN	sp|O43396|TXNL1_HUMAN	4	4	4	>sp|O43396|TXNL1_HUMAN Thioredoxin-like protein 1 OS=Homo sapiens GN=TXNL1 PE=1 SV=3	1	4	4	4	4	0	4	0	4	0	21.8	21.8	21.8	32.251	289	289	10.1						2	2	1	1	1								1		1	0	23.961	21.8	0	1383000	1383000	0
sp|O43399|TPD54_HUMAN	sp|O43399|TPD54_HUMAN	9	9	9	>sp|O43399|TPD54_HUMAN Tumor protein D54 OS=Homo sapiens GN=TPD52L2 PE=1 SV=2	1	9	9	9	8	4	8	4	8	4	58.7	58.7	58.7	22.237	206	206	8.38	3	2	3	1	4	3	6	3	2	1	1	1	1	1		1	2	2	1	1	0	88.188	52.4	34.5	14895000	12884000	2010900
sp|O43402|EMC8_HUMAN	sp|O43402|EMC8_HUMAN	2	2	2	>sp|O43402|EMC8_HUMAN ER membrane protein complex subunit 8 OS=Homo sapiens GN=EMC8 PE=1 SV=1	1	2	2	2	2	0	2	0	2	0	14.3	14.3	14.3	23.773	210	210	12.3								1						1	1						0	9.802	14.3	0	340300	340300	0
sp|O43414|ERI3_HUMAN	sp|O43414|ERI3_HUMAN	1	1	1	>sp|O43414|ERI3_HUMAN ERI1 exoribonuclease 3 OS=Homo sapiens GN=ERI3 PE=1 SV=2	1	1	1	1	1	0	1	0	1	0	3.3	3.3	3.3	37.238	337	337	18																		1			0.0075117	1.6089	3.3	0	30115	30115	0
sp|O43427|FIBP_HUMAN	sp|O43427|FIBP_HUMAN	2	2	2	>sp|O43427|FIBP_HUMAN Acidic fibroblast growth factor intracellular-binding protein OS=Homo sapiens GN=FIBP PE=1 SV=3	1	2	2	2	2	0	2	0	2	0	9.6	9.6	9.6	41.878	364	364	9									2												0	3.251	9.6	0	164930	164930	0
sp|O43432|IF4G3_HUMAN	sp|O43432|IF4G3_HUMAN	4	1	1	>sp|O43432|IF4G3_HUMAN Eukaryotic translation initiation factor 4 gamma 3 OS=Homo sapiens GN=EIF4G3 PE=1 SV=2	1	4	1	1	3	2	1	0	1	0	3.1	1.1	1.1	176.65	1585	1585	6.5						1	1														0	7.5485	2.3	1.2	192950	192950	0
sp|O43447|PPIH_HUMAN	sp|O43447|PPIH_HUMAN	4	4	4	>sp|O43447|PPIH_HUMAN Peptidyl-prolyl cis-trans isomerase H OS=Homo sapiens GN=PPIH PE=1 SV=1	1	4	4	4	4	1	4	1	4	1	47.5	47.5	47.5	19.208	177	177	7.75					1	3	2	1									1				0	32.385	47.5	5.6	1020500	872910	147550
sp|O43464|HTRA2_HUMAN;sp|P83110|HTRA3_HUMAN	sp|O43464|HTRA2_HUMAN	6;1	6;1	6;1	>sp|O43464|HTRA2_HUMAN Serine protease HTRA2, mitochondrial OS=Homo sapiens GN=HTRA2 PE=1 SV=2	2	6	6	6	6	0	6	0	6	0	19	19	19	48.84	458	458;453	9.67				1	1	1	2		2				1	4							0	32.908	19	0	1907200	1907200	0
sp|O43474|KLF4_HUMAN	sp|O43474|KLF4_HUMAN	2	2	2	>sp|O43474|KLF4_HUMAN Krueppel-like factor 4 OS=Homo sapiens GN=KLF4 PE=1 SV=3	1	2	2	2	2	0	2	0	2	0	7.8	7.8	7.8	54.67	513	513	14.5														1	1						0.0036937	2.1369	7.8	0	25509	25509	0
sp|O43488|ARK72_HUMAN;sp|Q8NHP1|ARK74_HUMAN	sp|O43488|ARK72_HUMAN	4;1	4;1	4;1	>sp|O43488|ARK72_HUMAN Aflatoxin B1 aldehyde reductase member 2 OS=Homo sapiens GN=AKR7A2 PE=1 SV=3	2	4	4	4	4	2	4	2	4	2	18.1	18.1	18.1	39.589	359	359;331	17.2													1			2	4	4	2		0	20.857	18.1	9.5	1482400	1334600	147830
sp|O43491|E41L2_HUMAN;sp|Q9Y2J2|E41L3_HUMAN	sp|O43491|E41L2_HUMAN	16;1	16;1	16;1	>sp|O43491|E41L2_HUMAN Band 4.1-like protein 2 OS=Homo sapiens GN=EPB41L2 PE=1 SV=1	2	16	16	16	9	8	9	8	9	8	25.6	25.6	25.6	112.59	1005	1005;1087	9.16	1				2	3	4	2	2	1							1	1	2		0	153.12	17.1	12.5	5939500	4688300	1251300
sp|O43504|LTOR5_HUMAN	sp|O43504|LTOR5_HUMAN	4	4	4	>sp|O43504|LTOR5_HUMAN Ragulator complex protein LAMTOR5 OS=Homo sapiens GN=LAMTOR5 PE=1 SV=1	1	4	4	4	4	1	4	1	4	1	85.7	85.7	85.7	9.6138	91	91	7.88	1	1					2				2	2									0	63.012	85.7	22	2516500	2282500	234060
sp|O43505|B4GA1_HUMAN	sp|O43505|B4GA1_HUMAN	1	1	1	>sp|O43505|B4GA1_HUMAN Beta-1,4-glucuronyltransferase 1 OS=Homo sapiens GN=B4GAT1 PE=1 SV=1	1	1	1	1	1	0	1	0	1	0	3.9	3.9	3.9	47.119	415	415	8								1													0	9.0889	3.9	0	164470	164470	0
sp|O43570|CAH12_HUMAN	sp|O43570|CAH12_HUMAN	1	1	1	>sp|O43570|CAH12_HUMAN Carbonic anhydrase 12 OS=Homo sapiens GN=CA12 PE=1 SV=1	1	1	1	1	1	0	1	0	1	0	4.2	4.2	4.2	39.45	354	354	15															1						0	3.3683	4.2	0	124650	124650	0
sp|O43583|DENR_HUMAN	sp|O43583|DENR_HUMAN	2	2	2	>sp|O43583|DENR_HUMAN Density-regulated protein OS=Homo sapiens GN=DENR PE=1 SV=2	1	2	2	2	2	1	2	1	2	1	19.7	19.7	19.7	22.092	198	198	7.33						1		2													0	7.1319	19.7	11.1	663270	552080	111180
sp|O43592|XPOT_HUMAN	sp|O43592|XPOT_HUMAN	15	15	15	>sp|O43592|XPOT_HUMAN Exportin-T OS=Homo sapiens GN=XPOT PE=1 SV=2	1	15	15	15	14	3	14	3	14	3	22	22	22	109.96	962	962	11.2					2	4	2	4	4	1	2	3	5	2	2		3	1	1	1	0	149.74	20.8	4.7	5624200	5237600	386610
sp|O43598|DNPH1_HUMAN	sp|O43598|DNPH1_HUMAN	2	2	2	>sp|O43598|DNPH1_HUMAN 2-deoxynucleoside 5-phosphate N-hydrolase 1 OS=Homo sapiens GN=DNPH1 PE=1 SV=1	1	2	2	2	2	0	2	0	2	0	20.1	20.1	20.1	19.108	174	174	9.67						1					1	1									0	13.222	20.1	0	479230	479230	0
sp|O43615|TIM44_HUMAN	sp|O43615|TIM44_HUMAN	9	9	9	>sp|O43615|TIM44_HUMAN Mitochondrial import inner membrane translocase subunit TIM44 OS=Homo sapiens GN=TIMM44 PE=1 SV=2	1	9	9	9	7	5	7	5	7	5	22.3	22.3	22.3	51.355	452	452	6.2	2	2		1	3	5	6	1	2	1	2										0	137.09	17.3	13.1	9958200	8523200	1435000
sp|O43617|TPPC3_HUMAN	sp|O43617|TPPC3_HUMAN	4	4	4	>sp|O43617|TPPC3_HUMAN Trafficking protein particle complex subunit 3 OS=Homo sapiens GN=TRAPPC3 PE=1 SV=1	1	4	4	4	3	1	3	1	3	1	26.1	26.1	26.1	20.274	180	180	7.3		1			1	2		1	4	1											0	18.43	20	6.1	2257900	2035400	222500
sp|O43653|PSCA_HUMAN	sp|O43653|PSCA_HUMAN	2	2	2	>sp|O43653|PSCA_HUMAN Prostate stem cell antigen OS=Homo sapiens GN=PSCA PE=1 SV=1	1	2	2	2	2	0	2	0	2	0	22	22	22	12.912	123	123	12.5						1	1											1	1		0	11.214	22	0	643520	643520	0
sp|O43660|PLRG1_HUMAN	sp|O43660|PLRG1_HUMAN	4	4	4	>sp|O43660|PLRG1_HUMAN Pleiotropic regulator 1 OS=Homo sapiens GN=PLRG1 PE=1 SV=1	1	4	4	4	4	0	4	0	4	0	14	14	14	57.193	514	514	11.7									1		2	1	3								0	41.973	14	0	817230	817230	0
sp|O43670|ZN207_HUMAN	sp|O43670|ZN207_HUMAN	3	3	3	>sp|O43670|ZN207_HUMAN BUB3-interacting and GLEBS motif-containing protein ZNF207 OS=Homo sapiens GN=ZNF207 PE=1 SV=1	1	3	3	3	3	1	3	1	3	1	8.8	8.8	8.8	50.75	478	478	6.89	2	2	1		1	4	2	3	2									1	1		0	32.441	8.8	2.7	6919800	6412200	507550
sp|O43674|NDUB5_HUMAN	sp|O43674|NDUB5_HUMAN	1	1	1	>sp|O43674|NDUB5_HUMAN NADH dehydrogenase [ubiquinone] 1 beta subcomplex subunit 5, mitochondrial OS=Homo sapiens GN=NDUFB5 PE=1 SV=1	1	1	1	1	1	0	1	0	1	0	7.9	7.9	7.9	21.75	189	189	10										1											0.0018023	2.6383	7.9	0	111440	111440	0
sp|O43678|NDUA2_HUMAN	sp|O43678|NDUA2_HUMAN	2	2	2	>sp|O43678|NDUA2_HUMAN NADH dehydrogenase [ubiquinone] 1 alpha subcomplex subunit 2 OS=Homo sapiens GN=NDUFA2 PE=1 SV=3	1	2	2	2	2	1	2	1	2	1	31.3	31.3	31.3	10.921	99	99	9.67						1		1	1	1		1	1								0	22.141	31.3	21.2	2157000	1631000	525960
sp|O43681|ASNA_HUMAN	sp|O43681|ASNA_HUMAN	5	5	5	>sp|O43681|ASNA_HUMAN ATPase ASNA1 OS=Homo sapiens GN=ASNA1 PE=1 SV=2	1	5	5	5	4	1	4	1	4	1	24.1	24.1	24.1	38.792	348	348	11.1						1		1	1			1	2				1				0	11.758	20.4	3.7	1597500	1459500	137940
sp|O43684|BUB3_HUMAN	sp|O43684|BUB3_HUMAN	6	6	6	>sp|O43684|BUB3_HUMAN Mitotic checkpoint protein BUB3 OS=Homo sapiens GN=BUB3 PE=1 SV=1	1	6	6	6	4	4	4	4	4	4	19.8	19.8	19.8	37.154	328	328	8.73		1				1		2	2	3	1		1								0	30.598	12.8	13.4	2653800	1973900	679960
sp|O43707|ACTN4_HUMAN;sp|Q08043|ACTN3_HUMAN	sp|O43707|ACTN4_HUMAN	41;5	41;5	29;0	>sp|O43707|ACTN4_HUMAN Alpha-actinin-4 OS=Homo sapiens GN=ACTN4 PE=1 SV=2	2	41	41	29	38	28	38	28	27	20	54.8	54.8	39.2	104.85	911	911;901	7.77	14	19	14	15	34	30	37	35	28	16	7	10	3	2	4	8	5	6	6	5	0	323.31	52.3	40.9	278930000	235080000	43851000
sp|O43708|MAAI_HUMAN	sp|O43708|MAAI_HUMAN	2	2	2	>sp|O43708|MAAI_HUMAN Maleylacetoacetate isomerase OS=Homo sapiens GN=GSTZ1 PE=1 SV=3	1	2	2	2	2	0	2	0	2	0	15.7	15.7	15.7	24.212	216	216	11.7										2	3	1	2	1							0	14.644	15.7	0	574860	574860	0
sp|O43719|HTSF1_HUMAN	sp|O43719|HTSF1_HUMAN	4	4	4	>sp|O43719|HTSF1_HUMAN HIV Tat-specific factor 1 OS=Homo sapiens GN=HTATSF1 PE=1 SV=1	1	4	4	4	4	0	4	0	4	0	8.3	8.3	8.3	85.852	755	755	6.57					3	1		2	1												0	74.788	8.3	0	752990	752990	0
sp|O43739|CYH3_HUMAN	sp|O43739|CYH3_HUMAN	2	2	1	>sp|O43739|CYH3_HUMAN Cytohesin-3 OS=Homo sapiens GN=CYTH3 PE=1 SV=2	1	2	2	1	2	0	2	0	1	0	5.2	5.2	2.5	46.348	400	400	11.3								1				1		1							0.0036801	2.0957	5.2	0	416680	416680	0
sp|Q9Y478|AAKB1_HUMAN;sp|O43741|AAKB2_HUMAN	sp|Q9Y478|AAKB1_HUMAN;sp|O43741|AAKB2_HUMAN	1;1	1;1	1;1	>sp|Q9Y478|AAKB1_HUMAN 5-AMP-activated protein kinase subunit beta-1 OS=Homo sapiens GN=PRKAB1 PE=1 SV=4;>sp|O43741|AAKB2_HUMAN 5-AMP-activated protein kinase subunit beta-2 OS=Homo sapiens GN=PRKAB2 PE=1 SV=1	2	1	1	1	1	0	1	0	1	0	3.7	3.7	3.7	30.382	270	270;272	17																	1				0.0022461	2.2891	3.7	0	240660	240660	0
sp|O43747|AP1G1_HUMAN	sp|O43747|AP1G1_HUMAN	8	8	8	>sp|O43747|AP1G1_HUMAN AP-1 complex subunit gamma-1 OS=Homo sapiens GN=AP1G1 PE=1 SV=5	1	8	8	8	7	2	7	2	7	2	16.1	16.1	16.1	91.35	822	822	14.7						1		1			1				1	1	3	2	1		0	49.498	14.8	2.3	1949800	1707400	242440
sp|O43752|STX6_HUMAN	sp|O43752|STX6_HUMAN	2	2	2	>sp|O43752|STX6_HUMAN Syntaxin-6 OS=Homo sapiens GN=STX6 PE=1 SV=1	1	2	2	2	2	0	2	0	2	0	12.5	12.5	12.5	29.176	255	255	7.67							1	2													0	21.113	12.5	0	390770	390770	0
sp|O43760|SNG2_HUMAN	sp|O43760|SNG2_HUMAN	1	1	1	>sp|O43760|SNG2_HUMAN Synaptogyrin-2 OS=Homo sapiens GN=SYNGR2 PE=1 SV=1	1	1	1	1	1	1	1	1	1	1	4.5	4.5	4.5	24.81	224	224	13	1															1	1	1			0	10.317	4.5	4.5	737270	236800	500470
sp|O43766|LIAS_HUMAN	sp|O43766|LIAS_HUMAN	1	1	1	>sp|O43766|LIAS_HUMAN Lipoyl synthase, mitochondrial OS=Homo sapiens GN=LIAS PE=1 SV=3	1	1	1	1	1	0	1	0	1	0	4.6	4.6	4.6	41.911	372	372	15															1						0	6.9139	4.6	0	134590	134590	0
sp|O43768|ENSA_HUMAN	sp|O43768|ENSA_HUMAN	2	2	2	>sp|O43768|ENSA_HUMAN Alpha-endosulfine OS=Homo sapiens GN=ENSA PE=1 SV=1	1	2	2	2	2	0	2	0	2	0	14.9	14.9	14.9	13.389	121	121	12.5											1			1							0.0097928	1.3261	14.9	0	305790	305790	0
sp|O43772|MCAT_HUMAN	sp|O43772|MCAT_HUMAN	3	3	3	>sp|O43772|MCAT_HUMAN Mitochondrial carnitine/acylcarnitine carrier protein OS=Homo sapiens GN=SLC25A20 PE=1 SV=1	1	3	3	3	3	1	3	1	3	1	15	15	15	32.943	301	301	11.8									1		1	2	1	1							0	6.0395	15	3	719940	668290	51653
sp|O43776|SYNC_HUMAN	sp|O43776|SYNC_HUMAN	6	6	6	>sp|O43776|SYNC_HUMAN Asparagine--tRNA ligase, cytoplasmic OS=Homo sapiens GN=NARS PE=1 SV=1	1	6	6	6	6	1	6	1	6	1	15.7	15.7	15.7	62.942	548	548	8.75						1	2	2	1	1					1						0	32.592	15.7	2.2	1052100	919690	132390
sp|O43795|MYO1B_HUMAN;sp|Q9UBC5|MYO1A_HUMAN	sp|O43795|MYO1B_HUMAN	4;1	4;1	4;1	>sp|O43795|MYO1B_HUMAN Unconventional myosin-Ib OS=Homo sapiens GN=MYO1B PE=1 SV=3	2	4	4	4	4	0	4	0	4	0	5.5	5.5	5.5	131.98	1136	1136;1043	13.8									1				1		1			1			0	8.5872	5.5	0	166610	166610	0
sp|O43805|SSNA1_HUMAN	sp|O43805|SSNA1_HUMAN	1	1	1	>sp|O43805|SSNA1_HUMAN Sjoegren syndrome nuclear autoantigen 1 OS=Homo sapiens GN=SSNA1 PE=1 SV=2	1	1	1	1	1	0	1	0	1	0	10.9	10.9	10.9	13.596	119	119	13												1	1	1							0.0018027	2.6386	10.9	0	27818	27818	0
sp|O43809|CPSF5_HUMAN	sp|O43809|CPSF5_HUMAN	6	6	6	>sp|O43809|CPSF5_HUMAN Cleavage and polyadenylation specificity factor subunit 5 OS=Homo sapiens GN=NUDT21 PE=1 SV=1	1	6	6	6	5	3	5	3	5	3	25.1	25.1	25.1	26.227	227	227	10.9	2			1		2	1	2	1			2	3	1		2	2	2			0	183.3	22	14.1	7375300	6663500	711860
sp|O43813|LANC1_HUMAN	sp|O43813|LANC1_HUMAN	2	2	2	>sp|O43813|LANC1_HUMAN LanC-like protein 1 OS=Homo sapiens GN=LANCL1 PE=1 SV=1	1	2	2	2	2	0	2	0	2	0	8.8	8.8	8.8	45.283	399	399	12												2									0	21.869	8.8	0	197700	197700	0
sp|O43815|STRN_HUMAN	sp|O43815|STRN_HUMAN	12	12	12	>sp|O43815|STRN_HUMAN Striatin OS=Homo sapiens GN=STRN PE=1 SV=4	1	12	12	12	12	1	12	1	12	1	25.9	25.9	25.9	86.131	780	780	9.72					1	1	1	4	4	1	1	1		4							0	66.214	25.9	2.8	2652100	2593500	58598
sp|O43818|U3IP2_HUMAN	sp|O43818|U3IP2_HUMAN	2	2	2	>sp|O43818|U3IP2_HUMAN U3 small nucleolar RNA-interacting protein 2 OS=Homo sapiens GN=RRP9 PE=1 SV=1	1	2	2	2	2	0	2	0	2	0	5.5	5.5	5.5	51.84	475	475	14.2											1	1				3					0	3.9915	5.5	0	163540	163540	0
sp|O43823|AKAP8_HUMAN	sp|O43823|AKAP8_HUMAN	3	3	3	>sp|O43823|AKAP8_HUMAN A-kinase anchor protein 8 OS=Homo sapiens GN=AKAP8 PE=1 SV=1	1	3	3	3	3	0	3	0	3	0	8.8	8.8	8.8	76.107	692	692	9.5						1			1		1	1									0	3.1546	8.8	0	350800	350800	0
sp|O43824|GTPB6_HUMAN	sp|O43824|GTPB6_HUMAN	2	2	2	>sp|O43824|GTPB6_HUMAN Putative GTP-binding protein 6 OS=Homo sapiens GN=GTPBP6 PE=2 SV=3	1	2	2	2	2	0	2	0	2	0	5.6	5.6	5.6	56.883	516	516	15												1						1			0.0017857	2.5529	5.6	0	77191	77191	0
sp|O43837|IDH3B_HUMAN	sp|O43837|IDH3B_HUMAN	5	5	5	>sp|O43837|IDH3B_HUMAN Isocitrate dehydrogenase [NAD] subunit beta, mitochondrial OS=Homo sapiens GN=IDH3B PE=1 SV=2	1	5	5	5	5	1	5	1	5	1	21.8	21.8	21.8	42.183	385	385	13.3					1		1	2	2						1	2	2		1	2	0	32.734	21.8	4.4	2640100	2472300	167840
sp|O43847|NRDC_HUMAN	sp|O43847|NRDC_HUMAN	8	8	8	>sp|O43847|NRDC_HUMAN Nardilysin OS=Homo sapiens GN=NRD1 PE=1 SV=2	1	8	8	8	7	1	7	1	7	1	8.7	8.7	8.7	131.57	1150	1150	14								1			2	2				1		1	2		0	22.356	7.7	1	432870	432870	0
sp|O43852|CALU_HUMAN	sp|O43852|CALU_HUMAN	8	8	8	>sp|O43852|CALU_HUMAN Calumenin OS=Homo sapiens GN=CALU PE=1 SV=2	1	8	8	8	7	3	7	3	7	3	38.4	38.4	38.4	37.106	315	315	6.47					4	3	5	3													0	53.393	36.2	12.1	8510000	6423500	2086500
sp|O43865|SAHH2_HUMAN	sp|O43865|SAHH2_HUMAN	3	3	1	>sp|O43865|SAHH2_HUMAN Adenosylhomocysteinase 2 OS=Homo sapiens GN=AHCYL1 PE=1 SV=2	1	3	3	1	2	1	2	1	1	0	8.9	8.9	4	58.951	530	530	12											1	1	1								0	9.074	6.6	2.3	363320	253030	110290
sp|O43916|CHST1_HUMAN	sp|O43916|CHST1_HUMAN	1	1	1	>sp|O43916|CHST1_HUMAN Carbohydrate sulfotransferase 1 OS=Homo sapiens GN=CHST1 PE=1 SV=1	1	1	1	1	1	0	1	0	1	0	3.6	3.6	3.6	46.714	411	411	18.5																		1	1		0.0092166	1.4438	3.6	0	413120	413120	0
sp|O43920|NDUS5_HUMAN	sp|O43920|NDUS5_HUMAN	3	3	3	>sp|O43920|NDUS5_HUMAN NADH dehydrogenase [ubiquinone] iron-sulfur protein 5 OS=Homo sapiens GN=NDUFS5 PE=1 SV=3	1	3	3	3	2	1	2	1	2	1	29.2	29.2	29.2	12.517	106	106	8.67							1	1			1										0	6.4007	22.6	6.6	941240	592360	348880
sp|O43924|PDE6D_HUMAN	sp|O43924|PDE6D_HUMAN	1	1	1	>sp|O43924|PDE6D_HUMAN Retinal rod rhodopsin-sensitive cGMP 3,5-cyclic phosphodiesterase subunit delta OS=Homo sapiens GN=PDE6D PE=1 SV=1	1	1	1	1	1	0	1	0	1	0	8	8	8	17.42	150	150	7							1														0	7.3499	8	0	173640	173640	0
sp|O43929|ORC4_HUMAN;CON__Q2YDI2	sp|O43929|ORC4_HUMAN;CON__Q2YDI2	2;1	2;1	2;1	>sp|O43929|ORC4_HUMAN Origin recognition complex subunit 4 OS=Homo sapiens GN=ORC4 PE=1 SV=2;>Q2YDI2 SWISS-PROT:Q2YDI2 (Bos taurus) Origin recognition complex subunit 4	2	2	2	2	2	0	2	0	2	0	6	6	6	50.377	436	436;436	8.5								1	1												0.0010574	2.8911	6	0	98148	98148	0
sp|O60216|RAD21_HUMAN	sp|O60216|RAD21_HUMAN	12	12	12	>sp|O60216|RAD21_HUMAN Double-strand-break repair protein rad21 homolog OS=Homo sapiens GN=RAD21 PE=1 SV=2	1	12	12	12	11	4	11	4	11	4	27.3	27.3	27.3	71.689	631	631	9.56	1	1		1	1	3	4	2	6	1		1				1	1	2	1	1	0	106.87	25.2	11.4	4789900	4254700	535260
sp|O60218|AK1BA_HUMAN	sp|O60218|AK1BA_HUMAN	2	2	2	>sp|O60218|AK1BA_HUMAN Aldo-keto reductase family 1 member B10 OS=Homo sapiens GN=AKR1B10 PE=1 SV=2	1	2	2	2	2	0	2	0	2	0	7.6	7.6	7.6	36.019	316	316	16															1		1				0.00080235	2.9778	7.6	0	62101	62101	0
sp|O60220|TIM8A_HUMAN	sp|O60220|TIM8A_HUMAN	2	2	2	>sp|O60220|TIM8A_HUMAN Mitochondrial import inner membrane translocase subunit Tim8 A OS=Homo sapiens GN=TIMM8A PE=1 SV=1	1	2	2	2	1	2	1	2	1	2	41.2	41.2	41.2	10.998	97	97	11									1		1	2									0	159.07	11.3	41.2	2638700	1844800	793920
sp|O60232|SSA27_HUMAN	sp|O60232|SSA27_HUMAN	5	5	5	>sp|O60232|SSA27_HUMAN Sjoegren syndrome/scleroderma autoantigen 1 OS=Homo sapiens GN=SSSCA1 PE=1 SV=1	1	5	5	5	5	2	5	2	5	2	51.8	51.8	51.8	21.474	199	199	9.2						1	3	2			2		1	1							0	76.079	51.8	23.6	3024000	2760000	263950
sp|O60245|PCDH7_HUMAN	sp|O60245|PCDH7_HUMAN	1	1	1	>sp|O60245|PCDH7_HUMAN Protocadherin-7 OS=Homo sapiens GN=PCDH7 PE=1 SV=2	1	1	1	1	1	0	1	0	1	0	1.5	1.5	1.5	116.07	1069	1069	8								1													0	7.2039	1.5	0	54082	54082	0
sp|O60256|KPRB_HUMAN	sp|O60256|KPRB_HUMAN	2	2	2	>sp|O60256|KPRB_HUMAN Phosphoribosyl pyrophosphate synthase-associated protein 2 OS=Homo sapiens GN=PRPSAP2 PE=1 SV=1	1	2	2	2	2	0	2	0	2	0	8.1	8.1	8.1	40.925	369	369	15.5														1			1				0	5.6241	8.1	0	115530	115530	0
sp|O60262|GBG7_HUMAN	sp|O60262|GBG7_HUMAN	1	1	1	>sp|O60262|GBG7_HUMAN Guanine nucleotide-binding protein G(I)/G(S)/G(O) subunit gamma-7 OS=Homo sapiens GN=GNG7 PE=1 SV=1	1	1	1	1	1	0	1	0	1	0	23.5	23.5	23.5	7.5217	68	68	8								1													0	7.174	23.5	0	242850	242850	0
sp|O60264|SMCA5_HUMAN	sp|O60264|SMCA5_HUMAN	14	14	11	>sp|O60264|SMCA5_HUMAN SWI/SNF-related matrix-associated actin-dependent regulator of chromatin subfamily A member 5 OS=Homo sapiens GN=SMARCA5 PE=1 SV=1	1	14	14	11	11	4	11	4	8	4	17.9	17.9	15.6	121.9	1052	1052	10.8					1	2	3	2	1	2	1	1		2			2	1	1		0	43.537	13.9	5.4	2421400	1926500	494860
sp|O60271|JIP4_HUMAN	sp|O60271|JIP4_HUMAN	6	6	6	>sp|O60271|JIP4_HUMAN C-Jun-amino-terminal kinase-interacting protein 4 OS=Homo sapiens GN=SPAG9 PE=1 SV=4	1	6	6	6	6	1	6	1	6	1	8.5	8.5	8.5	146.2	1321	1321	11.9							1	3	1				1				1	1	1		0	23.857	8.5	1.2	883380	818240	65147
sp|O60306|AQR_HUMAN	sp|O60306|AQR_HUMAN	8	8	8	>sp|O60306|AQR_HUMAN Intron-binding protein aquarius OS=Homo sapiens GN=AQR PE=1 SV=4	1	8	8	8	8	0	8	0	8	0	7.2	7.2	7.2	171.29	1485	1485	12							1	2		1		2	2	5	1						0	35.772	7.2	0	1739100	1739100	0
sp|O60313|OPA1_HUMAN	sp|O60313|OPA1_HUMAN	22	22	22	>sp|O60313|OPA1_HUMAN Dynamin-like 120 kDa protein, mitochondrial OS=Homo sapiens GN=OPA1 PE=1 SV=3	1	22	22	22	22	5	22	5	22	5	31.4	31.4	31.4	111.63	960	960	8.38	5	2	1	1	6	6	7	8	6	4	5	4			1	2	2	2	1		0	209.43	31.4	7.6	15251000	14036000	1214500
sp|O60341|KDM1A_HUMAN	sp|O60341|KDM1A_HUMAN	11	11	11	>sp|O60341|KDM1A_HUMAN Lysine-specific histone demethylase 1A OS=Homo sapiens GN=KDM1A PE=1 SV=2	1	11	11	11	11	0	11	0	11	0	22.1	22.1	22.1	92.902	852	852	14.3						1	1	2	2		1	1	1	2	1	1	1	4	3	2	0	25.167	22.1	0	1836100	1836100	0
sp|O60344|ECE2_HUMAN	sp|O60344|ECE2_HUMAN	1	1	1	>sp|O60344|ECE2_HUMAN Endothelin-converting enzyme 2 OS=Homo sapiens GN=ECE2 PE=1 SV=4	1	1	1	1	1	0	1	0	1	0	1.4	1.4	1.4	99.772	883	883	8.5								1	1												0.0008	2.9564	1.4	0	119730	119730	0
sp|O60353|FZD6_HUMAN	sp|O60353|FZD6_HUMAN	3	3	3	>sp|O60353|FZD6_HUMAN Frizzled-6 OS=Homo sapiens GN=FZD6 PE=1 SV=2	1	3	3	3	3	0	3	0	3	0	6.9	6.9	6.9	79.291	706	706	15.7													1		1				1		0	5.1437	6.9	0	292560	292560	0
sp|O60437|PEPL_HUMAN	sp|O60437|PEPL_HUMAN	30	30	30	>sp|O60437|PEPL_HUMAN Periplakin OS=Homo sapiens GN=PPL PE=1 SV=4	1	30	30	30	24	14	24	14	24	14	23.5	23.5	23.5	204.74	1756	1756	8.07	3	2			3	7	7	17	13					2			1	1	1	1	0	190.28	19.5	10.1	10489000	9126000	1362700
sp|O60449|LY75_HUMAN	sp|O60449|LY75_HUMAN	4	4	4	>sp|O60449|LY75_HUMAN Lymphocyte antigen 75 OS=Homo sapiens GN=LY75 PE=1 SV=3	1	4	4	4	4	0	4	0	4	0	3.9	3.9	3.9	198.31	1722	1722	11						1			1					1	1						0	4.6049	3.9	0	325050	325050	0
sp|O60476|MA1A2_HUMAN	sp|O60476|MA1A2_HUMAN	1	1	1	>sp|O60476|MA1A2_HUMAN Mannosyl-oligosaccharide 1,2-alpha-mannosidase IB OS=Homo sapiens GN=MAN1A2 PE=1 SV=1	1	1	1	1	1	0	1	0	1	0	1.7	1.7	1.7	73.003	641	641	7							1														0.0036568	2.0419	1.7	0	123970	123970	0
sp|O60488|ACSL4_HUMAN	sp|O60488|ACSL4_HUMAN	5	3	3	>sp|O60488|ACSL4_HUMAN Long-chain-fatty-acid--CoA ligase 4 OS=Homo sapiens GN=ACSL4 PE=1 SV=2	1	5	3	3	4	2	3	0	3	0	9.6	5.5	5.5	79.187	711	711	12.4										1	1	1	2	2							0	5.197	8	4.1	598860	598860	0
sp|O60493|SNX3_HUMAN	sp|O60493|SNX3_HUMAN	1	1	1	>sp|O60493|SNX3_HUMAN Sorting nexin-3 OS=Homo sapiens GN=SNX3 PE=1 SV=3	1	1	1	1	1	0	1	0	1	0	8.6	8.6	8.6	18.762	162	162	5					1																0.0010585	2.908	8.6	0	60475	60475	0
sp|O60499|STX10_HUMAN	sp|O60499|STX10_HUMAN	1	1	1	>sp|O60499|STX10_HUMAN Syntaxin-10 OS=Homo sapiens GN=STX10 PE=1 SV=1	1	1	1	1	1	0	1	0	1	0	4	4	4	28.114	249	249	6					1	1	1														0.0010576	2.8914	4	0	348610	348610	0
sp|O60502|OGA_HUMAN	sp|O60502|OGA_HUMAN	5	5	5	>sp|O60502|OGA_HUMAN Protein O-GlcNAcase OS=Homo sapiens GN=MGEA5 PE=1 SV=2	1	5	5	5	5	1	5	1	5	1	10.9	10.9	10.9	102.91	916	916	8	1					1	2		1				2								0	17.157	10.9	2.4	1257400	1182000	75462
sp|O60506|HNRPQ_HUMAN	sp|O60506|HNRPQ_HUMAN	12	12	9	>sp|O60506|HNRPQ_HUMAN Heterogeneous nuclear ribonucleoprotein Q OS=Homo sapiens GN=SYNCRIP PE=1 SV=2	1	12	12	9	10	6	10	6	8	4	28.1	28.1	23.6	69.602	623	623	9.14		2		1	2	3	5	3	3		1	1	2	2	2			2			0	100.54	23.8	15.6	10096000	8101700	1993800
sp|O60508|PRP17_HUMAN	sp|O60508|PRP17_HUMAN	3	3	3	>sp|O60508|PRP17_HUMAN Pre-mRNA-processing factor 17 OS=Homo sapiens GN=CDC40 PE=1 SV=1	1	3	3	3	3	0	3	0	3	0	7.4	7.4	7.4	65.521	579	579	11.7								1					1	1							0	6.1931	7.4	0	333870	333870	0
sp|O60512|B4GT3_HUMAN	sp|O60512|B4GT3_HUMAN	1	1	1	>sp|O60512|B4GT3_HUMAN Beta-1,4-galactosyltransferase 3 OS=Homo sapiens GN=B4GALT3 PE=1 SV=2	1	1	1	1	1	0	1	0	1	0	6.1	6.1	6.1	43.927	393	393	10										1											0	4.9926	6.1	0	60966	60966	0
sp|O60518|RNBP6_HUMAN	sp|O60518|RNBP6_HUMAN	6	4	4	>sp|O60518|RNBP6_HUMAN Ran-binding protein 6 OS=Homo sapiens GN=RANBP6 PE=1 SV=2	1	6	4	4	6	0	4	0	4	0	7.5	5.8	5.8	124.71	1105	1105	9						1		2			1	1									0	5.753	7.5	0	254720	254720	0
sp|O60547|GMDS_HUMAN	sp|O60547|GMDS_HUMAN	2	2	2	>sp|O60547|GMDS_HUMAN GDP-mannose 4,6 dehydratase OS=Homo sapiens GN=GMDS PE=1 SV=1	1	2	2	2	2	0	2	0	2	0	9.1	9.1	9.1	41.949	372	372	13											1				1						0	5.8212	9.1	0	239020	239020	0
sp|O60568|PLOD3_HUMAN	sp|O60568|PLOD3_HUMAN	11	11	11	>sp|O60568|PLOD3_HUMAN Procollagen-lysine,2-oxoglutarate 5-dioxygenase 3 OS=Homo sapiens GN=PLOD3 PE=1 SV=1	1	11	11	11	10	4	10	4	10	4	22.2	22.2	22.2	84.784	738	738	8	1	1	1		3	3		6	5	1	1	1		2	1						0	62.011	20.1	10	5167000	4292400	874600
sp|O60573|IF4E2_HUMAN	sp|O60573|IF4E2_HUMAN	1	1	1	>sp|O60573|IF4E2_HUMAN Eukaryotic translation initiation factor 4E type 2 OS=Homo sapiens GN=EIF4E2 PE=1 SV=1	1	1	1	1	1	0	1	0	1	0	5.3	5.3	5.3	28.362	245	245	12.5												1	1								0.0017885	2.563	5.3	0	186870	186870	0
sp|O60610|DIAP1_HUMAN	sp|O60610|DIAP1_HUMAN	19	19	19	>sp|O60610|DIAP1_HUMAN Protein diaphanous homolog 1 OS=Homo sapiens GN=DIAPH1 PE=1 SV=2	1	19	19	19	18	5	18	5	18	5	21.3	21.3	21.3	141.35	1272	1272	8.87	1	1			4	7	7	9	7		3	6	4	3	1	1					0	125.62	20.6	4.7	11041000	10082000	958580
sp|O60613|SEP15_HUMAN	sp|O60613|SEP15_HUMAN	3	3	3	>sp|O60613|SEP15_HUMAN 15 kDa selenoprotein OS=Homo sapiens GN=SEP15 PE=1 SV=3	1	3	3	3	3	1	3	1	3	1	23.5	23.5	23.5	17.79	162	162	8.33					1	2	1	1										1			0	9.0469	23.5	9.9	995240	827810	167430
sp|O60645|EXOC3_HUMAN	sp|O60645|EXOC3_HUMAN	7	7	7	>sp|O60645|EXOC3_HUMAN Exocyst complex component 3 OS=Homo sapiens GN=EXOC3 PE=1 SV=2	1	7	7	7	5	2	5	2	5	2	11.9	11.9	11.9	86.844	756	756	11.4									1	1		2		1							0	12.024	9.7	2.2	408360	346470	61889
sp|O60664|PLIN3_HUMAN	sp|O60664|PLIN3_HUMAN	15	15	15	>sp|O60664|PLIN3_HUMAN Perilipin-3 OS=Homo sapiens GN=PLIN3 PE=1 SV=3	1	15	15	15	14	10	14	10	14	10	58.3	58.3	58.3	47.074	434	434	9.57	8	9	7	8	4	7	7	8	5		5	6	6	8	1	2	14	4	3	4	0	323.31	54.1	40.6	63651000	52427000	11224000
sp|O60678|ANM3_HUMAN	sp|O60678|ANM3_HUMAN	2	2	2	>sp|O60678|ANM3_HUMAN Protein arginine N-methyltransferase 3 OS=Homo sapiens GN=PRMT3 PE=1 SV=3	1	2	2	2	2	0	2	0	2	0	4.7	4.7	4.7	59.875	531	531	11.5								1							1						0	6.0588	4.7	0	193100	193100	0
sp|O60684|IMA7_HUMAN;sp|O15131|IMA6_HUMAN	sp|O60684|IMA7_HUMAN;sp|O15131|IMA6_HUMAN	10;6	10;6	5;2	>sp|O60684|IMA7_HUMAN Importin subunit alpha-7 OS=Homo sapiens GN=KPNA6 PE=1 SV=1;>sp|O15131|IMA6_HUMAN Importin subunit alpha-6 OS=Homo sapiens GN=KPNA5 PE=1 SV=2	2	10	10	5	10	3	10	3	5	1	25.2	25.2	13.1	60.029	536	536;536	12.3		1			1	1	2	2	1	1	3	4	5	3		2	1	2	1	2	0	101.79	25.2	7.8	5693200	5108200	584940
sp|O60701|UGDH_HUMAN	sp|O60701|UGDH_HUMAN	4	4	4	>sp|O60701|UGDH_HUMAN UDP-glucose 6-dehydrogenase OS=Homo sapiens GN=UGDH PE=1 SV=1	1	4	4	4	4	0	4	0	4	0	14.4	14.4	14.4	55.023	494	494	11.4							2		1		1	3	3	2							0	8.8041	14.4	0	1099600	1099600	0
sp|O60716|CTND1_HUMAN	sp|O60716|CTND1_HUMAN	19	19	19	>sp|O60716|CTND1_HUMAN Catenin delta-1 OS=Homo sapiens GN=CTNND1 PE=1 SV=1	1	19	19	19	17	6	17	6	17	6	29.8	29.8	29.8	108.17	968	968	11.9	2					4	4	5	8	2	2	2	2	3	8	4	5	4	2		0	203.57	27.8	8.3	15262000	13927000	1335700
sp|O60725|ICMT_HUMAN	sp|O60725|ICMT_HUMAN	2	2	2	>sp|O60725|ICMT_HUMAN Protein-S-isoprenylcysteine O-methyltransferase OS=Homo sapiens GN=ICMT PE=1 SV=1	1	2	2	2	2	0	2	0	2	0	9.5	9.5	9.5	31.938	284	284	17.7															1			1		1	0	7.7179	9.5	0	286070	286070	0
sp|P41567|EIF1_HUMAN;sp|O60739|EIF1B_HUMAN	sp|P41567|EIF1_HUMAN;sp|O60739|EIF1B_HUMAN	2;2	2;2	2;2	>sp|P41567|EIF1_HUMAN Eukaryotic translation initiation factor 1 OS=Homo sapiens GN=EIF1 PE=1 SV=1;>sp|O60739|EIF1B_HUMAN Eukaryotic translation initiation factor 1b OS=Homo sapiens GN=EIF1B PE=1 SV=2	2	2	2	2	2	0	2	0	2	0	35.4	35.4	35.4	12.732	113	113;113	7.5						1			1												0	8.4104	35.4	0	264520	264520	0
sp|O60749|SNX2_HUMAN	sp|O60749|SNX2_HUMAN	10	10	8	>sp|O60749|SNX2_HUMAN Sorting nexin-2 OS=Homo sapiens GN=SNX2 PE=1 SV=2	1	10	10	8	6	6	6	6	5	4	22.5	22.5	18.5	58.47	519	519	11.2	2					1	2	2		1				2			1	2	1	1	0	65.459	13.1	14.1	4946600	3072300	1874300
sp|O60762|DPM1_HUMAN	sp|O60762|DPM1_HUMAN	4	4	4	>sp|O60762|DPM1_HUMAN Dolichol-phosphate mannosyltransferase subunit 1 OS=Homo sapiens GN=DPM1 PE=1 SV=1	1	4	4	4	4	1	4	1	4	1	16.5	16.5	16.5	29.634	260	260	14.6											1		1	1			1	1			0	7.9555	16.5	4.2	666360	480970	185390
sp|O60763|USO1_HUMAN	sp|O60763|USO1_HUMAN	17	17	17	>sp|O60763|USO1_HUMAN General vesicular transport factor p115 OS=Homo sapiens GN=USO1 PE=1 SV=2	1	17	17	17	14	5	14	5	14	5	29.8	29.8	29.8	107.89	962	962	8.94	1	1			2	4	5	5	3	1	1	1		4	1		2				0	125.15	24.4	8.2	6911500	6451400	460130
[truncated: 4,054 more rows]
[truncated: 13 more columns]
